# Supplementary material for: Manganese-catalysed benzylic C(sp3)–H amination for late-stage functionalization
Source: Springer Nature journal article supplement (doi:10.1038/s41557-018-0020-0), 2018-04-30
Supplement: 41557_2018_20_MOESM155_ESM.cif [file 41557_2018_20_MOESM155_ESM.cif]

 
data_dd59bsa 
 
_audit_creation_method            SHELXL-2014/6 
_audit_update_record 
; 
? 
; 
 
_chemical_name_systematic 
; 
? 
; 
 
_chemical_name_common            ? 
_chemical_melting_point          ? 
_chemical_formula_moiety         ' C17 H23 Cl3 N2 O3 S, H2 O  ' 
_chemical_formula_sum 
 'C17 H25 Cl3 N2 O4 S' 
_chemical_formula_structural     ? 
_chemical_formula_weight          459.80 
 
_chemical_absolute_configuration ? 
_chemical_formula_iupac          ? 
_chemical_formula_analytical     ? 
_chemical_compound_source        ? 
 
loop_ 
 _atom_type_symbol 
 _atom_type_description 
 _atom_type_scat_dispersion_real 
 _atom_type_scat_dispersion_imag 
 _atom_type_scat_source 
 'C'  'C'   0.0033   0.0016 
 'International Tables Vol C Tables 4.2.6.8 and 6.1.1.4' 
 'H'  'H'   0.0000   0.0000 
 'International Tables Vol C Tables 4.2.6.8 and 6.1.1.4' 
 'N'  'N'   0.0061   0.0033 
 'International Tables Vol C Tables 4.2.6.8 and 6.1.1.4' 
 'O'  'O'   0.0106   0.0060 
 'International Tables Vol C Tables 4.2.6.8 and 6.1.1.4' 
 'S'  'S'   0.1246   0.1234 
 'International Tables Vol C Tables 4.2.6.8 and 6.1.1.4' 
 'Cl'  'Cl'   0.1484   0.1585 
 'International Tables Vol C Tables 4.2.6.8 and 6.1.1.4' 
 
_space_group_crystal_system       orthorhombic 
_space_group_IT_number            61 
_space_group_name_H-M_alt         'P b c a' 
_space_group_name_Hall            '-P 2ac 2ab' 
 
_shelx_space_group_comment 
; 
The symmetry employed for this shelxl refinement is uniquely defined 
by the following loop, which should always be used as a source of 
symmetry information in preference to the above space-group names. 
They are only intended as comments. 
; 
 
loop_ 
 _space_group_symop_operation_xyz 
 'x, y, z' 
 '-x+1/2, -y, z+1/2' 
 '-x, y+1/2, -z+1/2' 
 'x+1/2, -y+1/2, -z' 
 '-x, -y, -z' 
 'x-1/2, y, -z-1/2' 
 'x, -y-1/2, z-1/2' 
 '-x-1/2, y-1/2, z' 
 
_cell_length_a                    13.2896(3) 
_cell_length_b                    17.4119(5) 
_cell_length_c                    17.5827(5) 
_cell_angle_alpha                 90 
_cell_angle_beta                  90 
_cell_angle_gamma                 90 
_cell_volume                      4068.59(19) 
_cell_formula_units_Z             8 
_cell_measurement_temperature    100(2) 
_cell_measurement_reflns_used      9646 
_cell_measurement_theta_min        2.34 
_cell_measurement_theta_max       28.33 
_exptl_crystal_description       'plate' 
_exptl_crystal_colour            'colourless' 
_exptl_crystal_density_meas      ? 
_exptl_crystal_density_method    'not measured' 
_exptl_crystal_density_diffrn     1.501 
_exptl_crystal_F_000              1920 
_exptl_transmission_factor_min    ? 
_exptl_transmission_factor_max    ? 
_exptl_crystal_size_max          0.474 
_exptl_crystal_size_mid          0.22 
_exptl_crystal_size_min          0.084 
_exptl_crystal_id                dd59bsa 
 
_exptl_crystal_preparation 
; 
The data crystal was mounted using oil (Parantone-N, Exxon) to a 
0.3 mm cryo-loop (Hampton Research) with the (4 1 1) scattering 
planes roughly normal to the spindle axis. 
; 
_exptl_absorpt_coefficient_mu     0.579 
_shelx_estimated_absorpt_T_min    0.771 
_shelx_estimated_absorpt_T_max    0.953 
_exptl_absorpt_correction_type   integration 
_exptl_absorpt_correction_T_min  0.82005 
_exptl_absorpt_correction_T_max  0.96329 
_exptl_absorpt_process_details   'SADABS V2014/5 (Bruker, 2014)' 
 
_exptl_absorpt_special_details    ? 
_exptl_special_details 
; 
One distinct cell was identified using APEX2 (Bruker, 2014). Four 
frame series were integrated and filtered for statistical outliers 
using SAINT (Bruker, 2014) then corrected for absorption by 
integration using SADABS v2014/5 (Bruker, 2014).  No decay 
correction was applied. 
; 
 
_diffrn_ambient_temperature      100(2) 
_diffrn_radiation_wavelength      0.71073 
_diffrn_radiation_wavelength_id  dd59bsa 
_diffrn_radiation_type           'MoK\a' 
_diffrn_radiation_source         'microfocus sealed tube' 
_diffrn_radiation_monochromator  'multilayer mirrors' 
_diffrn_source                    ? 
_diffrn_standards_number         ? 
_diffrn_standards_decay_%        ? 
_diffrn_standards_interval_time  ? 
 
_diffrn_measurement_device_type   ? 
_diffrn_measurement_device       'Bruker D8 Venture/Photon 100' 
_diffrn_measurement_method       'profile data from \f and \w scans' 
_diffrn_detector_area_resol_mean  ? 
_diffrn_reflns_number            46039 
 
_diffrn_reflns_av_unetI/netI      0.0240 
_diffrn_reflns_av_R_equivalents   0.0441 
_diffrn_reflns_limit_h_min        -17 
_diffrn_reflns_limit_h_max        17 
_diffrn_reflns_limit_k_min        -22 
_diffrn_reflns_limit_k_max        23 
_diffrn_reflns_limit_l_min        -23 
_diffrn_reflns_limit_l_max        23 
_diffrn_reflns_theta_min          2.317 
_diffrn_reflns_theta_max          28.347 
_diffrn_reflns_theta_full         25.242 
_diffrn_measured_fraction_theta_max   0.996 
_diffrn_measured_fraction_theta_full  0.999 
_diffrn_reflns_Laue_measured_fraction_max    0.996 
_diffrn_reflns_Laue_measured_fraction_full   0.999 
_diffrn_reflns_point_group_measured_fraction_max   0.996 
_diffrn_reflns_point_group_measured_fraction_full  0.999 
_reflns_number_total              5072 
_reflns_number_gt                 4694 
_reflns_threshold_expression      'I > 2\s(I)' 
_reflns_Friedel_coverage          0.000 
_reflns_Friedel_fraction_max      . 
_reflns_Friedel_fraction_full     . 
 
_reflns_special_details 
; 
 Reflections were merged by SHELXL according to the crystal 
 class for the calculation of statistics and refinement. 
 
 _reflns_Friedel_fraction is defined as the number of unique 
 Friedel pairs measured divided by the number that would be 
 possible theoretically, ignoring centric projections and 
 systematic absences. 
; 
 
_computing_data_collection       'APEX2 V2014.9-0 (Bruker, 2014)' 
 
_computing_cell_refinement       'SAINT V8.34A (Bruker, 2005)' 
_computing_data_reduction 
; 
SAINT V8.34A, XPREP v2014/2, SADABS V2014/5, 
(Bruker, 2012 & 2014) 
; 
_computing_structure_solution    'SHELX-2014-7 (Sheldrick, 2015)' 
_computing_structure_refinement  'SHELX-2014-7 (Sheldrick, 2015)' 
_computing_molecular_graphics 
; 
SHELXTL v2014-7 (Bruker, 2014), CrystalMaker v2.7.7 (CrystalMaker, 1994) 
; 
_computing_publication_material  'XCIF V2014-2 (Bruker, 2014)' 
 
_refine_special_details 
; 
Structure was phased by intrinsic phasing methods (Sheldrick, 
2015).  Systematic conditions suggested the unambiguous space group. 
The space group choice was confirmed by successful convergence of the 
full-matrix least-squares refinement on F^2^.  The final difference 
Fourier map had significant features.  A final analysis of 
variance between observed and calculated structure factors showed some 
dependence on amplitude and little dependence on resolution. 
; 
 
_refine_ls_structure_factor_coef  Fsqd 
_refine_ls_matrix_type            full 
_refine_ls_weighting_scheme       calc 
_refine_ls_weighting_details 
'w=1/[\s^2^(Fo^2^)+(0.0128P)^2^+6.4382P] where P=(Fo^2^+2Fc^2^)/3' 
_atom_sites_solution_primary      ? 
_atom_sites_solution_secondary    ? 
_atom_sites_solution_hydrogens    mixed 
_refine_ls_hydrogen_treatment     mixed 
_refine_ls_extinction_method      SHELXL 
_refine_ls_extinction_coef        0.0044(2) 
_refine_ls_extinction_expression 
 'Fc^*^=kFc[1+0.001xFc^2^\l^3^/sin(2\q)]^-1/4^' 
_refine_ls_number_reflns          5072 
_refine_ls_number_parameters      259 
_refine_ls_number_restraints      3 
_refine_ls_R_factor_all           0.0534 
_refine_ls_R_factor_gt            0.0476 
_refine_ls_wR_factor_ref          0.0944 
_refine_ls_wR_factor_gt           0.0924 
_refine_ls_goodness_of_fit_ref    1.255 
_refine_ls_restrained_S_all       1.255 
_refine_ls_shift/su_max           0.000 
_refine_ls_shift/su_mean          0.000 
 
_refine_ls_abs_structure_details ? 
loop_ 
 _atom_site_label 
 _atom_site_type_symbol 
 _atom_site_fract_x 
 _atom_site_fract_y 
 _atom_site_fract_z 
 _atom_site_U_iso_or_equiv 
 _atom_site_adp_type 
 _atom_site_occupancy 
 _atom_site_site_symmetry_order 
 _atom_site_calc_flag 
 _atom_site_refinement_flags_posn 
 _atom_site_refinement_flags_adp 
 _atom_site_refinement_flags_occupancy 
 _atom_site_disorder_assembly 
 _atom_site_disorder_group 
S1 S -0.00441(4) 0.47695(3) 0.26151(3) 0.01665(12) Uani 1 1 d . . . . . 
Cl1 Cl 0.17552(5) 0.50846(3) 0.52340(3) 0.02600(14) Uani 1 1 d . . . . . 
Cl2 Cl 0.11740(5) 0.36090(3) 0.46280(3) 0.02657(14) Uani 1 1 d . . . . . 
Cl3 Cl 0.28510(4) 0.44275(4) 0.39706(3) 0.02867(15) Uani 1 1 d . . . . . 
O1 O 0.08357(12) 0.45025(9) 0.31848(8) 0.0181(3) Uani 1 1 d . . . . . 
O2 O -0.09230(12) 0.48950(10) 0.30633(9) 0.0256(4) Uani 1 1 d . . . . . 
O3 O -0.00132(12) 0.41886(10) 0.20482(9) 0.0225(3) Uani 1 1 d . . . . . 
N1 N 0.28676(14) 0.71815(10) 0.24856(10) 0.0179(4) Uani 1 1 d . . . . . 
N2 N 0.02872(14) 0.55732(11) 0.22686(10) 0.0171(4) Uani 1 1 d . . . . . 
H2 H 0.010(2) 0.5977(16) 0.2516(17) 0.026 Uiso 1 1 d . U . . . 
C1 C 0.10886(15) 0.56435(12) 0.16859(11) 0.0138(4) Uani 1 1 d . . . . . 
H1A H 0.1244 0.5116 0.1494 0.017 Uiso 1 1 calc R U . . . 
C2 C 0.06775(15) 0.61078(12) 0.10236(11) 0.0141(4) Uani 1 1 d . . . . . 
C3 C -0.00930(16) 0.57807(13) 0.05944(12) 0.0180(4) Uani 1 1 d . . . . . 
H3A H -0.0340 0.5286 0.0726 0.022 Uiso 1 1 calc R U . . . 
C4 C -0.05044(17) 0.61655(14) -0.00207(12) 0.0219(5) Uani 1 1 d . . . . . 
H4A H -0.1028 0.5937 -0.0311 0.026 Uiso 1 1 calc R U . . . 
C5 C -0.01440(18) 0.68861(14) -0.02070(13) 0.0238(5) Uani 1 1 d . . . . . 
H5A H -0.0419 0.7155 -0.0629 0.029 Uiso 1 1 calc R U . . . 
C6 C 0.06178(17) 0.72174(13) 0.02196(12) 0.0196(4) Uani 1 1 d . . . . . 
H6A H 0.0857 0.7714 0.0086 0.023 Uiso 1 1 calc R U . . . 
C7 C 0.10438(15) 0.68350(12) 0.08448(11) 0.0152(4) Uani 1 1 d . . . . . 
C8 C 0.18966(16) 0.72050(12) 0.12939(12) 0.0151(4) Uani 1 1 d . . . . . 
H8A H 0.2537 0.7088 0.1019 0.018 Uiso 1 1 calc R U . . . 
C9 C 0.18055(18) 0.80806(13) 0.13418(14) 0.0225(5) Uani 1 1 d . . . . . 
H9A H 0.1815 0.8301 0.0823 0.027 Uiso 1 1 calc R U . . . 
H9B H 0.1157 0.8219 0.1583 0.027 Uiso 1 1 calc R U . . . 
C10 C 0.26716(18) 0.84135(13) 0.18051(14) 0.0244(5) Uani 1 1 d . . . . . 
H10A H 0.3311 0.8344 0.1524 0.029 Uiso 1 1 calc R U . . . 
H10B H 0.2564 0.8971 0.1880 0.029 Uiso 1 1 calc R U . . . 
C11 C 0.27429(18) 0.80196(13) 0.25710(13) 0.0227(5) Uani 1 1 d . . . . . 
H11A H 0.3322 0.8231 0.2857 0.027 Uiso 1 1 calc R U . . . 
H11B H 0.2125 0.8126 0.2867 0.027 Uiso 1 1 calc R U . . . 
C12 C 0.19824(15) 0.68498(12) 0.20935(11) 0.0150(4) Uani 1 1 d . . . . . 
H12A H 0.1363 0.6979 0.2390 0.018 Uiso 1 1 calc R U . . . 
C13 C 0.20557(15) 0.59791(12) 0.20148(11) 0.0151(4) Uani 1 1 d . . . . . 
H13A H 0.2186 0.5749 0.2520 0.018 Uiso 1 1 calc R U . . . 
H13B H 0.2628 0.5848 0.1678 0.018 Uiso 1 1 calc R U . . . 
C14 C 0.09282(17) 0.49464(13) 0.38711(12) 0.0196(4) Uani 1 1 d . . . . . 
H14A H 0.0264 0.5000 0.4120 0.024 Uiso 1 1 calc R U . . . 
H14B H 0.1187 0.5466 0.3753 0.024 Uiso 1 1 calc R U . . . 
C15 C 0.16553(16) 0.45260(13) 0.43924(12) 0.0174(4) Uani 1 1 d . . . . . 
C16 C 0.31001(16) 0.68326(14) 0.32361(12) 0.0206(4) Uani 1 1 d . . . . . 
H16A H 0.3732 0.7063 0.3428 0.025 Uiso 1 1 calc R U . . . 
H16B H 0.3227 0.6278 0.3159 0.025 Uiso 1 1 calc R U . . . 
C17 C 0.22920(18) 0.69205(14) 0.38503(13) 0.0247(5) Uani 1 1 d . . . . . 
H17A H 0.2489 0.6628 0.4303 0.037 Uiso 1 1 calc R U . . . 
H17B H 0.1649 0.6726 0.3658 0.037 Uiso 1 1 calc R U . . . 
H17C H 0.2221 0.7464 0.3984 0.037 Uiso 1 1 calc R U . . . 
O4 O -0.03381(16) 0.6850(2) 0.31798(15) 0.0538(8) Uani 1 1 d D . . . . 
H4B H -0.088(3) 0.695(2) 0.300(3) 0.081 Uiso 1 1 d D U . . . 
H4C H -0.049(6) 0.658(5) 0.356(4) 0.081 Uiso 0.43(6) 1 d D U P A 1 
H4D H -0.006(5) 0.7281(18) 0.322(5) 0.081 Uiso 0.57(6) 1 d D U P A 2 
 
loop_ 
 _atom_site_aniso_label 
 _atom_site_aniso_U_11 
 _atom_site_aniso_U_22 
 _atom_site_aniso_U_33 
 _atom_site_aniso_U_23 
 _atom_site_aniso_U_13 
 _atom_site_aniso_U_12 
S1 0.0142(2) 0.0232(3) 0.0126(2) 0.00281(19) 0.00042(18) -0.0019(2) 
Cl1 0.0339(3) 0.0303(3) 0.0138(2) -0.0058(2) -0.0033(2) 0.0013(2) 
Cl2 0.0382(3) 0.0211(3) 0.0203(3) 0.0073(2) -0.0013(2) -0.0052(2) 
Cl3 0.0174(2) 0.0399(3) 0.0287(3) -0.0128(3) 0.0011(2) -0.0049(2) 
O1 0.0233(8) 0.0201(8) 0.0109(7) -0.0003(6) -0.0036(6) 0.0042(6) 
O2 0.0168(8) 0.0396(10) 0.0205(8) 0.0046(7) 0.0060(6) -0.0018(7) 
O3 0.0228(8) 0.0274(9) 0.0171(7) -0.0009(6) -0.0023(6) -0.0060(7) 
N1 0.0193(8) 0.0198(9) 0.0147(8) -0.0010(7) -0.0025(7) -0.0004(7) 
N2 0.0196(9) 0.0180(9) 0.0138(8) 0.0018(7) 0.0055(7) 0.0044(7) 
C1 0.0148(9) 0.0151(9) 0.0114(9) 0.0006(7) 0.0031(7) 0.0029(8) 
C2 0.0145(9) 0.0168(10) 0.0109(9) -0.0007(7) 0.0030(7) 0.0042(8) 
C3 0.0195(10) 0.0190(10) 0.0156(10) -0.0005(8) 0.0027(8) -0.0007(8) 
C4 0.0207(11) 0.0290(12) 0.0160(10) -0.0025(9) -0.0027(8) 0.0001(9) 
C5 0.0284(12) 0.0290(12) 0.0139(10) 0.0039(9) -0.0047(9) 0.0033(10) 
C6 0.0227(11) 0.0203(11) 0.0158(10) 0.0033(8) 0.0019(8) 0.0015(9) 
C7 0.0159(9) 0.0177(10) 0.0122(9) -0.0009(8) 0.0019(7) 0.0039(8) 
C8 0.0169(10) 0.0146(10) 0.0138(9) 0.0017(8) 0.0007(7) 0.0016(8) 
C9 0.0265(11) 0.0155(10) 0.0254(12) 0.0025(9) -0.0041(9) 0.0019(9) 
C10 0.0275(12) 0.0163(11) 0.0295(12) -0.0002(9) -0.0036(10) -0.0025(9) 
C11 0.0262(12) 0.0184(11) 0.0235(11) -0.0059(9) -0.0019(9) -0.0021(9) 
C12 0.0146(9) 0.0170(10) 0.0133(9) -0.0015(8) 0.0005(7) 0.0010(8) 
C13 0.0154(9) 0.0170(10) 0.0131(9) 0.0010(8) 0.0000(7) 0.0037(8) 
C14 0.0275(11) 0.0182(10) 0.0132(9) -0.0013(8) -0.0026(8) 0.0022(9) 
C15 0.0190(10) 0.0199(10) 0.0134(9) -0.0013(8) 0.0001(8) -0.0037(8) 
C16 0.0187(10) 0.0268(12) 0.0164(10) 0.0007(9) -0.0040(8) -0.0019(9) 
C17 0.0274(12) 0.0300(13) 0.0167(10) -0.0007(9) 0.0003(9) -0.0044(10) 
O4 0.0170(9) 0.093(2) 0.0515(14) -0.0498(14) -0.0108(9) 0.0183(11) 
 
_geom_special_details 
; 
 All esds (except the esd in the dihedral angle between two l.s. planes) 
 are estimated using the full covariance matrix.  The cell esds are taken 
 into account individually in the estimation of esds in distances, angles 
 and torsion angles; correlations between esds in cell parameters are only 
 used when they are defined by crystal symmetry.  An approximate (isotropic) 
 treatment of cell esds is used for estimating esds involving l.s. planes. 
; 
 
loop_ 
 _geom_bond_atom_site_label_1 
 _geom_bond_atom_site_label_2 
 _geom_bond_distance 
 _geom_bond_site_symmetry_2 
 _geom_bond_publ_flag 
S1 O3 1.4207(17) . ? 
S1 O2 1.4258(16) . ? 
S1 N2 1.5885(19) . ? 
S1 O1 1.6084(15) . ? 
Cl1 C15 1.776(2) . ? 
Cl2 C15 1.769(2) . ? 
Cl3 C15 1.762(2) . ? 
O1 C14 1.438(2) . ? 
N1 C11 1.476(3) . ? 
N1 C12 1.481(3) . ? 
N1 C16 1.485(3) . ? 
N2 C1 1.483(3) . ? 
N2 H2 0.86(3) . ? 
C1 C2 1.519(3) . ? 
C1 C13 1.526(3) . ? 
C1 H1A 1.0000 . ? 
C2 C7 1.393(3) . ? 
C2 C3 1.394(3) . ? 
C3 C4 1.385(3) . ? 
C3 H3A 0.9500 . ? 
C4 C5 1.382(3) . ? 
C4 H4A 0.9500 . ? 
C5 C6 1.386(3) . ? 
C5 H5A 0.9500 . ? 
C6 C7 1.404(3) . ? 
C6 H6A 0.9500 . ? 
C7 C8 1.524(3) . ? 
C8 C9 1.532(3) . ? 
C8 C12 1.540(3) . ? 
C8 H8A 1.0000 . ? 
C9 C10 1.525(3) . ? 
C9 H9A 0.9900 . ? 
C9 H9B 0.9900 . ? 
C10 C11 1.514(3) . ? 
C10 H10A 0.9900 . ? 
C10 H10B 0.9900 . ? 
C11 H11A 0.9900 . ? 
C11 H11B 0.9900 . ? 
C12 C13 1.525(3) . ? 
C12 H12A 1.0000 . ? 
C13 H13A 0.9900 . ? 
C13 H13B 0.9900 . ? 
C14 C15 1.520(3) . ? 
C14 H14A 0.9900 . ? 
C14 H14B 0.9900 . ? 
C16 C17 1.531(3) . ? 
C16 H16A 0.9900 . ? 
C16 H16B 0.9900 . ? 
C17 H17A 0.9800 . ? 
C17 H17B 0.9800 . ? 
C17 H17C 0.9800 . ? 
O4 H4B 0.81(4) . ? 
O4 H4C 0.840(10) . ? 
O4 H4D 0.839(10) . ? 
 
loop_ 
 _geom_angle_atom_site_label_1 
 _geom_angle_atom_site_label_2 
 _geom_angle_atom_site_label_3 
 _geom_angle 
 _geom_angle_site_symmetry_1 
 _geom_angle_site_symmetry_3 
 _geom_angle_publ_flag 
O3 S1 O2 121.37(10) . . ? 
O3 S1 N2 110.49(10) . . ? 
O2 S1 N2 107.70(10) . . ? 
O3 S1 O1 102.13(9) . . ? 
O2 S1 O1 107.20(9) . . ? 
N2 S1 O1 106.98(9) . . ? 
C14 O1 S1 115.43(13) . . ? 
C11 N1 C12 110.10(17) . . ? 
C11 N1 C16 109.71(17) . . ? 
C12 N1 C16 114.79(17) . . ? 
C1 N2 S1 122.46(15) . . ? 
C1 N2 H2 119.4(19) . . ? 
S1 N2 H2 116.2(19) . . ? 
N2 C1 C2 108.37(16) . . ? 
N2 C1 C13 112.00(16) . . ? 
C2 C1 C13 112.93(17) . . ? 
N2 C1 H1A 107.8 . . ? 
C2 C1 H1A 107.8 . . ? 
C13 C1 H1A 107.8 . . ? 
C7 C2 C3 120.41(19) . . ? 
C7 C2 C1 122.09(18) . . ? 
C3 C2 C1 117.50(19) . . ? 
C4 C3 C2 121.0(2) . . ? 
C4 C3 H3A 119.5 . . ? 
C2 C3 H3A 119.5 . . ? 
C5 C4 C3 119.2(2) . . ? 
C5 C4 H4A 120.4 . . ? 
C3 C4 H4A 120.4 . . ? 
C4 C5 C6 120.2(2) . . ? 
C4 C5 H5A 119.9 . . ? 
C6 C5 H5A 119.9 . . ? 
C5 C6 C7 121.4(2) . . ? 
C5 C6 H6A 119.3 . . ? 
C7 C6 H6A 119.3 . . ? 
C2 C7 C6 117.8(2) . . ? 
C2 C7 C8 121.82(18) . . ? 
C6 C7 C8 120.33(19) . . ? 
C7 C8 C9 112.98(17) . . ? 
C7 C8 C12 111.00(17) . . ? 
C9 C8 C12 110.82(17) . . ? 
C7 C8 H8A 107.2 . . ? 
C9 C8 H8A 107.2 . . ? 
C12 C8 H8A 107.2 . . ? 
C10 C9 C8 110.37(18) . . ? 
C10 C9 H9A 109.6 . . ? 
C8 C9 H9A 109.6 . . ? 
C10 C9 H9B 109.6 . . ? 
C8 C9 H9B 109.6 . . ? 
H9A C9 H9B 108.1 . . ? 
C11 C10 C9 110.50(19) . . ? 
C11 C10 H10A 109.6 . . ? 
C9 C10 H10A 109.6 . . ? 
C11 C10 H10B 109.6 . . ? 
C9 C10 H10B 109.6 . . ? 
H10A C10 H10B 108.1 . . ? 
N1 C11 C10 111.36(18) . . ? 
N1 C11 H11A 109.4 . . ? 
C10 C11 H11A 109.4 . . ? 
N1 C11 H11B 109.4 . . ? 
C10 C11 H11B 109.4 . . ? 
H11A C11 H11B 108.0 . . ? 
N1 C12 C13 112.27(17) . . ? 
N1 C12 C8 109.10(17) . . ? 
C13 C12 C8 108.73(16) . . ? 
N1 C12 H12A 108.9 . . ? 
C13 C12 H12A 108.9 . . ? 
C8 C12 H12A 108.9 . . ? 
C12 C13 C1 111.18(17) . . ? 
C12 C13 H13A 109.4 . . ? 
C1 C13 H13A 109.4 . . ? 
C12 C13 H13B 109.4 . . ? 
C1 C13 H13B 109.4 . . ? 
H13A C13 H13B 108.0 . . ? 
O1 C14 C15 107.55(17) . . ? 
O1 C14 H14A 110.2 . . ? 
C15 C14 H14A 110.2 . . ? 
O1 C14 H14B 110.2 . . ? 
C15 C14 H14B 110.2 . . ? 
H14A C14 H14B 108.5 . . ? 
C14 C15 Cl3 111.50(15) . . ? 
C14 C15 Cl2 110.25(15) . . ? 
Cl3 C15 Cl2 109.68(12) . . ? 
C14 C15 Cl1 106.63(15) . . ? 
Cl3 C15 Cl1 109.67(11) . . ? 
Cl2 C15 Cl1 109.04(11) . . ? 
N1 C16 C17 116.11(19) . . ? 
N1 C16 H16A 108.3 . . ? 
C17 C16 H16A 108.3 . . ? 
N1 C16 H16B 108.3 . . ? 
C17 C16 H16B 108.3 . . ? 
H16A C16 H16B 107.4 . . ? 
C16 C17 H17A 109.5 . . ? 
C16 C17 H17B 109.5 . . ? 
H17A C17 H17B 109.5 . . ? 
C16 C17 H17C 109.5 . . ? 
H17A C17 H17C 109.5 . . ? 
H17B C17 H17C 109.5 . . ? 
H4B O4 H4C 103(5) . . ? 
H4B O4 H4D 103(4) . . ? 
 
loop_ 
 _geom_torsion_atom_site_label_1 
 _geom_torsion_atom_site_label_2 
 _geom_torsion_atom_site_label_3 
 _geom_torsion_atom_site_label_4 
 _geom_torsion 
 _geom_torsion_site_symmetry_1 
 _geom_torsion_site_symmetry_2 
 _geom_torsion_site_symmetry_3 
 _geom_torsion_site_symmetry_4 
 _geom_torsion_publ_flag 
O3 S1 O1 C14 -174.27(15) . . . . ? 
O2 S1 O1 C14 -45.67(17) . . . . ? 
N2 S1 O1 C14 69.62(16) . . . . ? 
O3 S1 N2 C1 -36.57(19) . . . . ? 
O2 S1 N2 C1 -171.21(16) . . . . ? 
O1 S1 N2 C1 73.84(18) . . . . ? 
S1 N2 C1 C2 128.08(16) . . . . ? 
S1 N2 C1 C13 -106.68(19) . . . . ? 
N2 C1 C2 C7 113.0(2) . . . . ? 
C13 C1 C2 C7 -11.7(3) . . . . ? 
N2 C1 C2 C3 -66.7(2) . . . . ? 
C13 C1 C2 C3 168.59(18) . . . . ? 
C7 C2 C3 C4 0.6(3) . . . . ? 
C1 C2 C3 C4 -179.66(19) . . . . ? 
C2 C3 C4 C5 -0.2(3) . . . . ? 
C3 C4 C5 C6 -0.2(3) . . . . ? 
C4 C5 C6 C7 0.2(3) . . . . ? 
C3 C2 C7 C6 -0.5(3) . . . . ? 
C1 C2 C7 C6 179.73(18) . . . . ? 
C3 C2 C7 C8 -179.03(19) . . . . ? 
C1 C2 C7 C8 1.2(3) . . . . ? 
C5 C6 C7 C2 0.1(3) . . . . ? 
C5 C6 C7 C8 178.7(2) . . . . ? 
C2 C7 C8 C9 -147.4(2) . . . . ? 
C6 C7 C8 C9 34.1(3) . . . . ? 
C2 C7 C8 C12 -22.2(3) . . . . ? 
C6 C7 C8 C12 159.30(19) . . . . ? 
C7 C8 C9 C10 179.31(18) . . . . ? 
C12 C8 C9 C10 54.0(2) . . . . ? 
C8 C9 C10 C11 -53.0(3) . . . . ? 
C12 N1 C11 C10 -61.9(2) . . . . ? 
C16 N1 C11 C10 170.86(18) . . . . ? 
C9 C10 C11 N1 57.2(3) . . . . ? 
C11 N1 C12 C13 -178.00(17) . . . . ? 
C16 N1 C12 C13 -53.6(2) . . . . ? 
C11 N1 C12 C8 61.4(2) . . . . ? 
C16 N1 C12 C8 -174.22(17) . . . . ? 
C7 C8 C12 N1 175.55(16) . . . . ? 
C9 C8 C12 N1 -58.1(2) . . . . ? 
C7 C8 C12 C13 52.8(2) . . . . ? 
C9 C8 C12 C13 179.19(17) . . . . ? 
N1 C12 C13 C1 174.00(16) . . . . ? 
C8 C12 C13 C1 -65.2(2) . . . . ? 
N2 C1 C13 C12 -79.2(2) . . . . ? 
C2 C1 C13 C12 43.5(2) . . . . ? 
S1 O1 C14 C15 169.86(14) . . . . ? 
O1 C14 C15 Cl3 60.4(2) . . . . ? 
O1 C14 C15 Cl2 -61.7(2) . . . . ? 
O1 C14 C15 Cl1 -179.96(14) . . . . ? 
C11 N1 C16 C17 61.9(2) . . . . ? 
C12 N1 C16 C17 -62.7(2) . . . . ? 
 
loop_ 
 _geom_hbond_atom_site_label_D 
 _geom_hbond_atom_site_label_H 
 _geom_hbond_atom_site_label_A 
 _geom_hbond_distance_DH 
 _geom_hbond_distance_HA 
 _geom_hbond_distance_DA 
 _geom_hbond_angle_DHA 
 _geom_hbond_site_symmetry_A 
N2 H2 O4  0.86(3) 2.00(3) 2.863(3) 175(3) . 
O4 H4B N1  0.81(4) 1.91(4) 2.718(3) 177(5) 6_556 
 
_refine_diff_density_max    0.466 
_refine_diff_density_min   -0.333 
_refine_diff_density_rms    0.070 
 
_shelxl_version_number 2014/6 
 
_shelx_res_file 
; 
TITL dd59bsa in Pbca 
CELL 0.71073  13.28960  17.41190  17.58270  90.0000  90.0000  90.0000 
ZERR    8.00   0.00030   0.00050   0.00050   0.0000   0.0000   0.0000 
LATT  1 
SYMM 0.5-X, -Y, 0.5+Z 
SYMM -X, 0.5+Y, 0.5-Z 
SYMM 0.5+X, 0.5-Y, -Z 
SFAC C H N O S CL 
UNIT 136 200 16 32 8 24 
TEMP -173.140 
SIZE 0.084 0.22 0.474 
L.S. 10 
BOND $H 
HTAB 
HTAB N2 O4 
 
EQIV $1 x-1/2, y, -z+1/2 
HTAB O4 N1_$1 
 
WPDB -2 
CONF 
ACTA 
FMAP 2 
PLAN 20 
sadi 0.01 h4b h4c h4b h4d 
DFIX 0.84 0.01 O4 H4c o4 h4d 
WGHT    0.012800    6.438200 
EXTI    0.004422 
FVAR       0.10312   0.43333 
S1    5   -0.004410    0.476950    0.261511    11.00000    0.01416    0.02318 = 
         0.01261    0.00281    0.00042   -0.00191 
CL1   6    0.175524    0.508462    0.523400    11.00000    0.03385    0.03034 = 
         0.01381   -0.00582   -0.00327    0.00127 
CL2   6    0.117404    0.360902    0.462805    11.00000    0.03824    0.02112 = 
         0.02035    0.00731   -0.00132   -0.00525 
CL3   6    0.285100    0.442746    0.397059    11.00000    0.01740    0.03990 = 
         0.02871   -0.01278    0.00110   -0.00494 
O1    4    0.083573    0.450249    0.318485    11.00000    0.02334    0.02010 = 
         0.01087   -0.00031   -0.00358    0.00418 
O2    4   -0.092301    0.489497    0.306325    11.00000    0.01681    0.03957 = 
         0.02049    0.00460    0.00603   -0.00180 
O3    4   -0.001318    0.418861    0.204816    11.00000    0.02285    0.02739 = 
         0.01711   -0.00090   -0.00231   -0.00603 
N1    3    0.286764    0.718153    0.248559    11.00000    0.01930    0.01980 = 
         0.01472   -0.00101   -0.00250   -0.00040 
N2    3    0.028723    0.557322    0.226864    11.00000    0.01964    0.01799 = 
         0.01379    0.00183    0.00552    0.00440 
H2    2    0.009680    0.597656    0.251617    11.00000   -1.50000 
C1    1    0.108861    0.564346    0.168589    11.00000    0.01478    0.01511 = 
         0.01140    0.00064    0.00315    0.00286 
AFIX  13 
H1A   2    0.124421    0.511584    0.149447    11.00000   -1.20000 
AFIX   0 
C2    1    0.067747    0.610780    0.102361    11.00000    0.01447    0.01684 = 
         0.01088   -0.00069    0.00296    0.00416 
C3    1   -0.009304    0.578071    0.059438    11.00000    0.01946    0.01902 = 
         0.01559   -0.00053    0.00270   -0.00065 
AFIX  43 
H3A   2   -0.033984    0.528616    0.072584    11.00000   -1.20000 
AFIX   0 
C4    1   -0.050436    0.616545   -0.002071    11.00000    0.02065    0.02904 = 
         0.01600   -0.00249   -0.00274    0.00007 
AFIX  43 
H4A   2   -0.102769    0.593705   -0.031108    11.00000   -1.20000 
AFIX   0 
C5    1   -0.014403    0.688608   -0.020703    11.00000    0.02837    0.02904 = 
         0.01394    0.00387   -0.00468    0.00333 
AFIX  43 
H5A   2   -0.041936    0.715488   -0.062865    11.00000   -1.20000 
AFIX   0 
C6    1    0.061782    0.721742    0.021963    11.00000    0.02268    0.02029 = 
         0.01576    0.00329    0.00190    0.00146 
AFIX  43 
H6A   2    0.085689    0.771369    0.008638    11.00000   -1.20000 
AFIX   0 
C7    1    0.104381    0.683502    0.084475    11.00000    0.01590    0.01765 = 
         0.01218   -0.00090    0.00190    0.00385 
C8    1    0.189657    0.720499    0.129392    11.00000    0.01691    0.01456 = 
         0.01383    0.00170    0.00065    0.00156 
AFIX  13 
H8A   2    0.253720    0.708806    0.101898    11.00000   -1.20000 
AFIX   0 
C9    1    0.180549    0.808055    0.134177    11.00000    0.02648    0.01555 = 
         0.02543    0.00249   -0.00410    0.00186 
AFIX  23 
H9A   2    0.181486    0.830144    0.082299    11.00000   -1.20000 
H9B   2    0.115740    0.821925    0.158304    11.00000   -1.20000 
AFIX   0 
C10   1    0.267161    0.841347    0.180509    11.00000    0.02751    0.01630 = 
         0.02951   -0.00022   -0.00363   -0.00254 
AFIX  23 
H10A  2    0.331076    0.834389    0.152418    11.00000   -1.20000 
H10B  2    0.256375    0.897093    0.188010    11.00000   -1.20000 
AFIX   0 
C11   1    0.274285    0.801958    0.257103    11.00000    0.02617    0.01844 = 
         0.02350   -0.00587   -0.00191   -0.00210 
AFIX  23 
H11A  2    0.332216    0.823080    0.285661    11.00000   -1.20000 
H11B  2    0.212486    0.812583    0.286730    11.00000   -1.20000 
AFIX   0 
C12   1    0.198240    0.684985    0.209347    11.00000    0.01462    0.01695 = 
         0.01330   -0.00151    0.00050    0.00099 
AFIX  13 
H12A  2    0.136279    0.697931    0.238962    11.00000   -1.20000 
AFIX   0 
C13   1    0.205573    0.597914    0.201482    11.00000    0.01536    0.01696 = 
         0.01308    0.00097    0.00004    0.00371 
AFIX  23 
H13A  2    0.218572    0.574895    0.252020    11.00000   -1.20000 
H13B  2    0.262781    0.584820    0.167830    11.00000   -1.20000 
AFIX   0 
C14   1    0.092823    0.494638    0.387109    11.00000    0.02752    0.01820 = 
         0.01316   -0.00133   -0.00258    0.00224 
AFIX  23 
H14A  2    0.026383    0.499963    0.412022    11.00000   -1.20000 
H14B  2    0.118728    0.546602    0.375327    11.00000   -1.20000 
AFIX   0 
C15   1    0.165533    0.452596    0.439239    11.00000    0.01901    0.01992 = 
         0.01340   -0.00127    0.00014   -0.00374 
C16   1    0.310009    0.683257    0.323609    11.00000    0.01865    0.02684 = 
         0.01644    0.00070   -0.00398   -0.00191 
AFIX  23 
H16A  2    0.373159    0.706350    0.342821    11.00000   -1.20000 
H16B  2    0.322682    0.627769    0.315921    11.00000   -1.20000 
AFIX   0 
C17   1    0.229203    0.692053    0.385034    11.00000    0.02735    0.03004 = 
         0.01667   -0.00069    0.00028   -0.00441 
AFIX 137 
H17A  2    0.248892    0.662806    0.430269    11.00000   -1.50000 
H17B  2    0.164892    0.672557    0.365772    11.00000   -1.50000 
H17C  2    0.222093    0.746427    0.398386    11.00000   -1.50000 
AFIX   0 
O4    4   -0.033806    0.684985    0.317981    11.00000    0.01703    0.09306 = 
         0.05145   -0.04976   -0.01081    0.01827 
H4B   2   -0.087962    0.695308    0.299861    11.00000   -1.50000 
part 1 21 
H4C   2   -0.049010    0.657677    0.355653    21.00000   -1.50000 
part 2 -21 
H4D   2   -0.006162    0.728119    0.322101   -21.00000   -1.50000 
 
HKLF 4 
 
REM  dd59bsa in Pbca 
REM R1 =  0.0476 for    4694 Fo > 4sig(Fo)  and  0.0534 for all    5072 data 
REM    259 parameters refined using      3 restraints 
 
END 
 
WGHT      0.0090      6.3546 
 
REM Instructions for potential hydrogen bonds 
HTAB N2 O4 
EQIV $2 -x+1/2, y+1/2, z 
HTAB C11 O1_$2 
HTAB C11 Cl3_$2 
EQIV $3 x+1/2, y, -z+1/2 
HTAB C13 O2_$3 
EQIV $4 -x, -y+1, -z+1 
HTAB C14 Cl1_$4 
HTAB O4 N1_$1 
 
REM Highest difference peak  0.466,  deepest hole -0.333,  1-sigma level  0.070 
Q1    1   0.2013  0.6417  0.2060  11.00000  0.05    0.47 
Q2    1   0.2212  0.8270  0.1584  11.00000  0.05    0.41 
Q3    1   0.1596  0.5863  0.1782  11.00000  0.05    0.37 
Q4    1   0.1440  0.7001  0.1036  11.00000  0.05    0.34 
Q5    1   0.0924  0.6948  0.0470  11.00000  0.05    0.33 
Q6    1   0.0999  0.6421  0.0832  11.00000  0.05    0.33 
Q7    1   0.0201  0.5203  0.2469  11.00000  0.05    0.32 
Q8    1  -0.0386  0.6989  0.2998  11.00000  0.05    0.32 
Q9    1   0.1288  0.4685  0.4116  11.00000  0.05    0.31 
Q10   1   0.2726  0.8220  0.2176  11.00000  0.05    0.30 
Q11   1   0.0815  0.5921  0.1371  11.00000  0.05    0.29 
Q12   1   0.1879  0.6978  0.1688  11.00000  0.05    0.29 
Q13   1  -0.0485  0.6630  0.3373  11.00000  0.05    0.29 
Q14   1   0.3271  0.7127  0.2180  11.00000  0.05    0.28 
Q15   1   0.0391  0.6996 -0.0118  11.00000  0.05    0.27 
Q16   1   0.0147  0.6036  0.0879  11.00000  0.05    0.27 
Q17   1   0.2397  0.7055  0.2405  11.00000  0.05    0.27 
Q18   1  -0.0476  0.6576 -0.0046  11.00000  0.05    0.27 
Q19   1  -0.0375  0.6006  0.0347  11.00000  0.05    0.27 
Q20   1   0.1428  0.4086  0.4438  11.00000  0.05    0.26 
; 
_shelx_res_checksum   50194 
 
_shelx_hkl_file 
; 
   2   0   0   -0.07    0.08 
  -2   0   0   -0.21    0.08 
  -3   0   0   -0.06    0.08 
   3   0   0   -0.08    0.07 
   4   0   0  346.95   11.14 
  -4   0   0  371.25   11.14 
  -5   0   0   -0.44    0.13 
   5   0   0   -0.51    0.12 
   6   0   0   51.13    1.96 
  -7   0   0    0.47    0.19 
   7   0   0    0.36    0.16 
   8   0   0    2.12    0.32 
  -8   0   0    1.64    0.30 
   9   0   0    0.75    0.24 
  -9   0   0    0.61    0.21 
  10   0   0  461.24   14.74 
 -10   0   0  463.88   14.74 
  11   0   0    0.63    0.32 
 -11   0   0    0.36    0.28 
 -12   0   0    4.20    0.49 
  12   0   0    4.36    0.31 
  13   0   0    0.02    0.40 
 -13   0   0    1.19    0.37 
 -14   0   0    8.04    0.75 
  14   0   0    6.66    1.36 
 -15   0   0   -0.04    0.40 
  15   0   0   -0.82    0.58 
  16   0   0    1.21    0.70 
 -16   0   0    1.82    0.48 
 -17   0   0    1.31    0.49 
  17   0   0    2.27    0.84 
  -2   1   0    0.49    0.06 
  -2  -1   0    0.53    0.08 
  -2   1   0    0.44    0.08 
  -2   1   0    0.41    0.05 
  -2   1   0    0.46    0.11 
   2  -1   0    0.35    0.08 
   2  -1   0    0.51    0.05 
   3  -1   0    0.72    0.14 
   3  -1   0    0.40    0.07 
  -3   1   0    0.44    0.12 
   3  -1   0    0.43    0.07 
  -3   1   0    0.56    0.15 
  -3  -1   0    0.63    0.11 
  -4  -1   0   65.14    2.18 
   4  -1   0   61.17    2.20 
  -4   1   0   65.12    2.18 
   4  -1   0   62.83    1.98 
   4  -1   0   64.01    2.00 
  -4   1   0   58.68    2.20 
  -5  -1   0   -0.11    0.13 
   5   1   0   -0.20    0.11 
  -5   1   0    0.00    0.14 
   5  -1   0   -0.10    0.04 
   5  -1   0   -0.20    0.05 
   5  -1   0   -0.14    0.10 
   6  -1   0   15.80    0.57 
   6   1   0   15.05    0.78 
   6  -1   0   14.69    0.80 
   6  -1   0   16.16    0.60 
  -6  -1   0   15.95    0.78 
  -6   1   0   15.87    0.79 
   7  -1   0    0.08    0.15 
   7   1   0    0.22    0.15 
   7  -1   0    0.13    0.06 
  -7  -1   0    0.38    0.16 
  -7   1   0    0.51    0.19 
   7  -1   0    0.00    0.08 
   8  -1   0   23.23    0.87 
   8  -1   0   23.59    0.84 
  -8   1   0   24.12    1.15 
  -8  -1   0   23.68    1.14 
   8  -1   0   23.53    1.16 
   8   1   0   22.84    1.15 
  -9   1   0    0.35    0.23 
   9  -1   0    0.83    0.16 
   9   1   0    0.65    0.22 
  -9  -1   0    0.67    0.23 
   9  -1   0    0.77    0.22 
   9  -1   0    0.50    0.10 
  10  -1   0   49.89    1.71 
 -10   1   0   50.59    2.15 
  10  -1   0   50.93    1.76 
  10   1   0   51.08    2.15 
 -10  -1   0   50.44    2.14 
  10  -1   0   50.70    2.15 
 -11   1   0    0.93    0.32 
 -11  -1   0    0.62    0.28 
  11  -1   0    2.11    0.44 
  11   1   0    1.06    0.31 
  11  -1   0    1.50    0.19 
  12   1   0   -0.38    0.35 
 -12  -1   0   -0.58    0.34 
  12  -1   0    0.06    0.45 
 -12   1   0    0.12    0.30 
  13   1   0   -0.01    0.43 
 -13  -1   0    0.34    0.36 
 -13   1   0    0.43    0.33 
  13  -1   0    0.65    0.42 
  14   1   0    1.32    0.49 
 -14  -1   0    2.84    0.51 
 -14   1   0    1.74    0.42 
  15   1   0    0.58    0.58 
 -15  -1   0    0.20    0.43 
  15  -1   0    0.89    0.59 
 -15   1   0   -0.34    0.39 
  16   1   0    3.58    0.77 
 -16   1   0    1.99    0.49 
  16  -1   0    3.76    0.80 
 -16  -1   0    2.51    0.55 
 -17  -1   0    0.29    0.48 
 -17   1   0    0.54    0.49 
  17   1   0    1.17    0.86 
  17  -1   0   -0.45    0.86 
   0   2   0  297.42    8.96 
   0   2   0  294.12    8.99 
   0  -2   0  317.89    8.95 
   0  -2   0  263.47    8.96 
   1   2   0    0.03    0.03 
  -1   2   0    0.04    0.04 
   1  -2   0    0.03    0.04 
  -1   2   0    0.02    0.03 
   1  -2   0    0.03    0.03 
  -1  -2   0    0.04    0.03 
  -2  -2   0  416.78   11.69 
   2   2   0  366.60   11.59 
  -2   2   0  355.01   11.64 
  -2   2   0  388.01   11.75 
   2  -2   0  383.79   11.73 
  -3   2   0   -0.13    0.10 
  -3  -2   0   -0.26    0.08 
  -3   2   0   -0.16    0.04 
   3  -2   0   -0.01    0.07 
  -3   2   0   -0.12    0.07 
  -4   2   0    0.77    0.08 
  -4  -2   0    0.74    0.15 
   4  -2   0    1.03    0.17 
   4  -2   0    1.05    0.11 
  -4   2   0    0.74    0.17 
  -4   2   0    0.87    0.17 
   5  -2   0    0.01    0.05 
  -5   2   0   -0.15    0.11 
  -5   2   0   -0.23    0.14 
   5  -2   0    0.07    0.10 
  -5  -2   0   -0.07    0.12 
   6  -2   0   80.52    2.58 
  -6   2   0   75.15    2.88 
  -6   2   0   83.75    2.86 
   6  -2   0   77.56    2.86 
  -6  -2   0   82.73    2.84 
   7  -2   0    0.03    0.15 
  -7  -2   0    0.16    0.17 
   7   2   0    0.16    0.16 
  -7   2   0    0.22    0.21 
   7  -2   0    0.32    0.08 
   8  -2   0   20.33    1.05 
   8  -2   0   20.04    0.78 
  -8   2   0   20.57    1.02 
  -8  -2   0   20.27    1.02 
   8   2   0   19.45    1.01 
   9   2   0    0.88    0.24 
   9  -2   0    0.93    0.24 
  -9  -2   0    1.32    0.29 
  -9   2   0    0.85    0.25 
   9  -2   0    0.84    0.16 
  10   2   0   92.91    3.49 
  10  -2   0   93.73    3.53 
  10  -2   0   91.62    3.06 
 -10  -2   0   96.08    3.52 
 -10   2   0   93.60    3.53 
  11  -2   0    2.34    0.24 
 -11   2   0    2.62    0.42 
 -11  -2   0    1.94    0.35 
 -12   2   0  112.88    4.30 
  12  -2   0  113.64    4.28 
 -12  -2   0  114.11    4.26 
  12   2   0  114.67    4.24 
 -13  -2   0   -0.26    0.31 
  13   2   0    0.45    0.41 
 -13   2   0   -0.40    0.40 
  13  -2   0   -0.37    0.43 
 -14   2   0   15.93    1.13 
  14  -2   0   18.21    1.22 
  14   2   0   17.58    1.15 
 -14  -2   0   17.78    1.12 
 -15  -2   0    0.10    0.42 
  15   2   0    0.32    0.61 
 -15   2   0   -0.20    0.46 
  15  -2   0    1.10    0.64 
 -16   2   0    1.69    0.50 
  16   2   0    1.58    0.71 
 -16  -2   0    2.07    0.46 
  16  -2   0    2.09    0.71 
  17  -2   0    2.02    0.96 
 -17  -2   0    0.36    0.48 
  17   2   0    1.97    0.87 
 -17   2   0   -0.08    0.48 
   0   3   0   -0.52    0.05 
   0   3   0   -0.56    0.05 
   0  -3   0   -0.48    0.05 
   1  -3   0   -0.06    0.05 
  -1   3   0   -0.08    0.06 
  -1  -3   0   -0.06    0.04 
  -1   3   0   -0.03    0.06 
   1   3   0    0.04    0.05 
   1  -3   0   -0.09    0.04 
  -2   3   0   10.02    0.52 
  -2  -3   0   10.89    0.45 
   2  -3   0   11.19    0.48 
  -2   3   0   11.10    0.48 
   2   3   0   10.21    0.45 
  -3   3   0    0.11    0.10 
   3   3   0    0.13    0.05 
   3  -3   0    0.33    0.11 
  -3   3   0    0.11    0.06 
  -3  -3   0    0.10    0.08 
   3  -3   0    0.14    0.06 
  -3   3   0    0.10    0.10 
   4  -3   0   76.36    2.74 
  -4   3   0   79.02    2.58 
   4  -3   0   79.73    2.61 
  -4  -3   0   82.53    2.74 
   4   3   0   77.95    2.49 
  -4   3   0   81.37    2.70 
  -4   3   0   81.72    2.57 
   5  -3   0    0.11    0.12 
  -5   3   0   -0.08    0.17 
   5  -3   0    0.08    0.08 
  -5   3   0    0.05    0.06 
  -5  -3   0    0.23    0.13 
  -5   3   0   -0.03    0.12 
  -5   3   0    0.02    0.07 
  -6  -3   0  144.94    6.02 
   6  -3   0  179.65    5.72 
  -6   3   0  187.80    5.70 
   6  -3   0  175.17    5.42 
  -7   3   0    0.13    0.21 
   7  -3   0    0.18    0.18 
  -7   3   0    0.22    0.17 
   7  -3   0    0.26    0.10 
  -7  -3   0    0.33    0.16 
   8  -3   0   25.56    1.26 
   8   3   0   25.10    1.20 
   8  -3   0   26.94    1.02 
  -8  -3   0   26.14    1.21 
  -8   3   0   26.51    1.24 
   9   3   0    0.14    0.22 
   9  -3   0    0.11    0.12 
   9  -3   0   -0.32    0.23 
  -9  -3   0   -0.01    0.19 
  -9   3   0    0.28    0.28 
  10  -3   0   73.59    2.90 
 -10  -3   0   72.91    2.84 
  10   3   0   72.63    2.84 
  10  -3   0   72.31    2.49 
 -10   3   0   73.95    2.90 
 -11   3   0    0.45    0.34 
  11  -3   0    0.33    0.17 
  11  -3   0    0.06    0.32 
  11   3   0   -0.11    0.32 
 -11  -3   0    0.13    0.28 
 -12  -3   0    0.83    0.29 
 -12   3   0    1.43    0.42 
  12   3   0    0.98    0.37 
  12  -3   0    1.09    0.20 
  12  -3   0    1.45    0.41 
 -13   3   0    0.03    0.36 
  13   3   0   -0.22    0.45 
 -13  -3   0    0.32    0.31 
  13  -3   0    0.18    0.43 
 -14  -3   0    3.00    0.50 
 -14   3   0    2.55    0.49 
  14  -3   0    4.22    0.69 
  14   3   0    2.84    0.55 
  15  -3   0   -0.21    0.68 
 -15   3   0   -0.01    0.42 
 -15  -3   0    0.49    0.40 
  15   3   0   -0.34    0.58 
  16  -3   0   10.93    1.17 
 -16   3   0   11.12    0.96 
  16   3   0   10.21    1.14 
 -16  -3   0    9.97    0.87 
  17  -3   0   -0.24    0.87 
 -17  -3   0    0.96    0.51 
 -17   3   0    0.58    0.54 
  17   3   0    1.30    0.90 
   0  -4   0  246.69    7.91 
   0   4   0  258.73    7.87 
   0  -4   0  263.83    7.86 
   0   4   0  251.98    7.92 
   1  -4   0   -0.03    0.06 
  -1   4   0   -0.05    0.06 
  -1  -4   0    0.08    0.07 
   1   4   0    0.03    0.08 
   2  -4   0    3.60    0.27 
  -2   4   0    3.77    0.27 
  -2   4   0    3.16    0.28 
   2   4   0    3.48    0.24 
   2  -4   0    3.86    0.27 
  -3   4   0    0.17    0.07 
   3  -4   0    0.27    0.10 
  -3   4   0    0.34    0.12 
   3  -4   0    0.17    0.07 
  -3  -4   0    0.20    0.08 
   3   4   0    0.23    0.06 
   4   4   0   18.48    0.69 
  -4  -4   0   19.06    0.79 
  -4   4   0   19.34    0.76 
  -4   4   0   17.84    0.89 
  -4   4   0   18.84    0.80 
   4  -4   0   19.46    0.79 
   4  -4   0   18.02    0.85 
  -5  -4   0    0.99    0.15 
   5   4   0    0.98    0.10 
   5  -4   0    1.29    0.18 
  -5   4   0    0.90    0.18 
  -5   4   0    1.02    0.20 
   5  -4   0    1.05    0.14 
  -6   4   0   88.33    2.84 
  -6   4   0   85.17    3.20 
  -6  -4   0   87.78    3.04 
  -6   4   0   91.19    2.83 
   6  -4   0   85.78    3.13 
   6   4   0   86.56    2.77 
   6  -4   0   89.65    2.93 
  -7   4   0   -0.08    0.20 
   7  -4   0   -0.11    0.10 
   7   4   0    0.22    0.07 
   7  -4   0    0.26    0.17 
  -7  -4   0    0.10    0.16 
  -7   4   0   -0.07    0.18 
  -8   4   0   35.77    1.53 
  -8   4   0   33.14    1.61 
   8  -4   0   33.99    1.54 
  -8  -4   0   33.97    1.48 
   8  -4   0   34.33    1.31 
   9  -4   0   -0.01    0.13 
   9  -4   0    0.25    0.22 
  -9  -4   0   -0.07    0.21 
  -9   4   0    0.25    0.27 
   9   4   0   -0.11    0.23 
  10   4   0   38.28    1.77 
 -10   4   0   40.48    1.84 
  10  -4   0   40.32    1.83 
  10  -4   0   41.34    1.53 
 -10  -4   0   40.88    1.79 
  11   4   0    0.40    0.33 
 -11  -4   0    0.95    0.31 
 -11   4   0    0.56    0.34 
  11  -4   0    0.83    0.42 
  11  -4   0    0.67    0.19 
 -12   4   0   98.42    3.88 
  12  -4   0   99.61    3.41 
  12   4   0  101.00    3.80 
 -12  -4   0  100.53    3.81 
  12  -4   0  101.45    3.86 
 -13   4   0    1.02    0.40 
  13  -4   0    1.22    0.49 
 -13  -4   0    0.87    0.32 
  14  -4   0    1.93    0.55 
 -14   4   0    2.01    0.52 
  14   4   0    2.21    0.54 
 -14  -4   0    2.30    0.45 
 -15   4   0    1.07    0.48 
 -15  -4   0    0.57    0.39 
  15  -4   0    0.48    0.66 
  15   4   0    0.52    0.64 
 -16   4   0    2.12    0.52 
 -16  -4   0    1.80    0.43 
  16  -4   0    0.96    0.73 
  16   4   0    1.73    0.75 
 -17   4   0    0.36    0.55 
 -17  -4   0    0.56    0.45 
  17   4   0    0.58    0.89 
   0  -5   0    0.33    0.10 
   0   5   0    0.58    0.13 
  -1   5   0    1.15    0.17 
  -1   5   0    1.00    0.14 
   1   5   0    0.92    0.14 
  -1  -5   0    1.01    0.13 
   1  -5   0    1.14    0.15 
  -2   5   0  258.41    8.12 
   2   5   0  255.45    8.02 
  -2   5   0  259.83    8.07 
   2  -5   0  258.89    8.06 
  -2  -5   0  258.10    8.00 
   2  -5   0  257.79    8.07 
   3  -5   0    0.41    0.14 
  -3   5   0    0.58    0.17 
  -3   5   0    0.30    0.10 
   3   5   0    0.24    0.08 
  -4   5   0    5.86    0.44 
  -4  -5   0    6.20    0.35 
   4  -5   0    5.38    0.39 
   4  -5   0    6.06    0.38 
   4   5   0    5.80    0.31 
  -4   5   0    5.70    0.35 
  -5   5   0    0.33    0.10 
   5  -5   0    0.34    0.13 
  -5   5   0    0.67    0.18 
   5   5   0    0.33    0.10 
  -5   5   0    0.42    0.17 
   5  -5   0    0.64    0.14 
   6   5   0   42.81    1.46 
  -6   5   0   43.77    1.70 
  -6   5   0   42.26    1.81 
  -6   5   0   44.10    1.53 
   6  -5   0   40.92    1.72 
   6  -5   0   42.88    1.59 
  -6  -5   0   43.15    1.65 
  -6   5   0   42.80    1.55 
  -7   5   0    0.31    0.12 
   7  -5   0    0.29    0.11 
   7   5   0    0.36    0.09 
  -7  -5   0    0.21    0.15 
  -7   5   0    0.19    0.19 
   7  -5   0    0.52    0.20 
  -7   5   0    0.13    0.22 
  -7   5   0    0.31    0.10 
   8  -5   0    6.80    0.45 
  -8   5   0    6.90    0.61 
  -8  -5   0    7.07    0.50 
  -8   5   0    6.84    0.53 
   8   5   0    7.12    0.34 
   8  -5   0    7.27    0.56 
   9  -5   0    0.33    0.16 
  -9  -5   0    0.46    0.19 
  -9   5   0    0.73    0.28 
   9  -5   0    0.63    0.27 
  -9   5   0    0.24    0.27 
   9   5   0    0.24    0.10 
 -10  -5   0  136.53    4.71 
  10  -5   0  131.90    4.43 
  10   5   0  131.86    4.23 
  10  -5   0  139.83    4.84 
 -10   5   0  132.70    4.81 
  10   5   0  129.87    4.70 
  11  -5   0    0.57    0.20 
 -11  -5   0    0.35    0.23 
  11   5   0    0.22    0.34 
  11  -5   0    0.31    0.33 
 -11   5   0    0.22    0.36 
  12   5   0    4.73    0.63 
 -12   5   0    6.10    0.60 
 -12  -5   0    5.46    0.55 
  12  -5   0    5.89    0.45 
  12  -5   0    5.78    0.68 
 -13   5   0    0.22    0.38 
  13  -5   0    0.52    0.43 
 -13  -5   0    0.56    0.30 
  14   5   0    4.30    0.77 
  14  -5   0    4.68    0.80 
 -14  -5   0    5.16    0.57 
 -14   5   0    5.36    0.68 
  15   5   0    1.22    0.76 
 -15   5   0    1.40    0.53 
 -15  -5   0    0.89    0.39 
  15  -5   0    2.08    0.67 
 -16  -5   0    2.12    0.41 
 -16   5   0    1.66    0.49 
  16  -5   0    2.03    0.80 
 -17  -5   0    0.50    0.66 
 -17   5   0   -0.05    0.58 
  17   5   0   -0.27    1.00 
   0   6   0  377.78   11.77 
   0  -6   0  392.82   11.66 
   0   6   0  381.73   11.69 
   0  -6   0  365.76   11.74 
   1  -6   0    0.18    0.08 
  -1  -6   0    0.09    0.07 
   1   6   0    0.00    0.07 
  -1   6   0    0.02    0.08 
   1   6   0    0.12    0.08 
   1  -6   0    0.01    0.07 
   2  -6   0   31.93    1.19 
  -2   6   0   30.43    1.24 
  -2   6   0   31.10    1.22 
   2  -6   0   31.08    1.22 
   2   6   0   29.84    1.18 
  -2  -6   0   30.27    1.16 
   3   6   0    0.07    0.08 
   3  -6   0   -0.14    0.08 
  -3   6   0    0.10    0.12 
   3  -6   0    0.01    0.11 
  -3   6   0   -0.13    0.09 
   4  -6   0  111.68    3.73 
  -4   6   0  114.88    3.73 
   4  -6   0  112.48    3.79 
   4   6   0  111.40    3.64 
  -4   6   0  110.61    3.88 
   5  -6   0    0.14    0.11 
   5   6   0    0.09    0.09 
   5  -6   0   -0.11    0.15 
  -5  -6   0    0.12    0.12 
  -5   6   0   -0.05    0.16 
  -5   6   0    0.06    0.11 
  -6   6   0   20.44    1.08 
   6  -6   0   20.13    0.91 
  -6   6   0   21.03    0.96 
  -6  -6   0   19.91    0.91 
   6   6   0   20.50    0.81 
   6  -6   0   20.09    0.99 
  -6   6   0   19.96    0.86 
  -7   6   0    0.16    0.12 
  -7   6   0    0.27    0.21 
   7  -6   0    0.01    0.13 
   7  -6   0    0.37    0.20 
  -7  -6   0    0.23    0.17 
  -7   6   0    0.40    0.16 
   7   6   0    0.22    0.10 
  -7   6   0    0.21    0.25 
   8   6   0    1.99    0.20 
  -8   6   0    2.09    0.32 
  -8   6   0    1.94    0.22 
   8  -6   0    1.95    0.26 
  -8  -6   0    1.76    0.26 
   8  -6   0    1.75    0.35 
  -8   6   0    1.88    0.19 
  -8   6   0    1.65    0.37 
   9  -6   0   -0.02    0.16 
  -9  -6   0   -0.02    0.21 
   9  -6   0    0.07    0.27 
  -9   6   0    0.27    0.28 
  -9   6   0    0.03    0.27 
   9   6   0    0.01    0.12 
 -10   6   0    5.23    0.51 
  10  -6   0    5.39    0.42 
 -10  -6   0    4.20    0.44 
  10   6   0    5.05    0.32 
 -11  -6   0   -0.33    0.26 
  11   6   0    0.03    0.16 
  11   6   0    0.54    0.34 
 -11   6   0    0.28    0.33 
  11  -6   0   -0.34    0.33 
  11  -6   0    0.44    0.22 
 -12  -6   0   34.21    1.68 
 -12   6   0   35.57    1.76 
  12  -6   0   36.50    1.53 
  12   6   0   35.15    1.65 
  12   6   0   34.21    1.30 
  13   6   0    0.09    0.53 
 -13  -6   0    0.11    0.29 
  13  -6   0    0.22    0.29 
 -13   6   0    0.86    0.46 
  13  -6   0    0.22    0.51 
 -14   6   0   46.34    2.30 
  14  -6   0   49.02    2.28 
  14   6   0   49.49    2.21 
 -14  -6   0   47.24    2.21 
 -15   6   0    0.17    0.51 
 -15  -6   0   -0.29    0.36 
  15   6   0    1.72    1.26 
  15  -6   0   -0.10    0.68 
 -16   6   0    5.37    0.73 
 -16  -6   0    3.58    0.57 
  16   6   0    5.41    0.85 
 -17  -6   0   -0.35    0.70 
  17   6   0    0.62    1.04 
 -17   6   0    0.37    0.55 
   0   7   0   -0.07    0.11 
   0  -7   0    0.26    0.08 
   0   7   0    0.06    0.09 
   0  -7   0    0.13    0.09 
   1  -7   0    0.49    0.13 
  -1  -7   0    0.37    0.11 
   1   7   0    0.48    0.13 
   1   7   0    0.66    0.15 
  -1   7   0    0.72    0.15 
   1  -7   0    0.63    0.13 
  -2   7   0   16.70    0.82 
   2  -7   0   18.88    0.80 
  -2  -7   0   17.71    0.78 
   2   7   0   17.29    0.80 
  -2   7   0   17.45    0.85 
   2   7   0   18.63    0.72 
   2  -7   0   17.89    0.83 
  -3   7   0   -0.09    0.10 
   3  -7   0   -0.09    0.10 
   3  -7   0   -0.08    0.09 
  -3   7   0   -0.05    0.13 
   3   7   0   -0.12    0.09 
   4  -7   0   31.54    1.37 
  -4   7   0   32.78    1.44 
  -4   7   0   33.75    1.33 
   4  -7   0   32.26    1.33 
   4   7   0   32.76    1.27 
   5  -7   0    0.79    0.17 
  -5   7   0    0.41    0.12 
   5   7   0    0.73    0.15 
  -5   7   0    0.76    0.22 
   5  -7   0    0.46    0.13 
   6  -7   0    1.07    0.21 
  -6   7   0    1.43    0.25 
   6   7   0    1.07    0.17 
  -6   7   0    1.41    0.27 
  -6  -7   0    0.99    0.18 
   6  -7   0    1.06    0.22 
  -6   7   0    1.12    0.24 
  -7   7   0    0.42    0.22 
   7   7   0    0.24    0.13 
  -7  -7   0    0.51    0.17 
  -7   7   0   -0.03    0.14 
  -7   7   0    0.27    0.17 
   7  -7   0    0.18    0.20 
  -7   7   0    0.15    0.24 
   7  -7   0    0.30    0.14 
   8  -7   0    6.38    0.53 
  -8  -7   0    6.64    0.48 
   8  -7   0    7.11    0.49 
  -8   7   0    7.07    0.42 
   8   7   0    6.63    0.40 
  -8   7   0    6.95    0.54 
  -8   7   0    6.42    0.40 
  -8   7   0    6.51    0.58 
  -9   7   0    0.14    0.31 
  -9  -7   0    0.03    0.20 
   9  -7   0    0.39    0.19 
  -9   7   0   -0.13    0.15 
  -9   7   0    0.03    0.14 
   9  -7   0    0.02    0.27 
  -9   7   0   -0.50    0.31 
 -10  -7   0   19.64    1.05 
  10  -7   0   20.23    0.97 
 -10   7   0   19.59    1.21 
 -10   7   0   19.05    1.12 
  10   7   0   19.29    0.84 
  10  -7   0   19.40    1.11 
 -11   7   0    0.31    0.34 
  11   7   0    0.23    0.18 
 -11  -7   0    0.25    0.26 
  11  -7   0    0.14    0.35 
  11  -7   0    0.24    0.24 
 -12  -7   0    9.72    0.73 
  12   7   0   10.05    0.80 
  12  -7   0   10.31    0.67 
  12  -7   0    8.78    0.83 
  12   7   0    8.70    0.52 
 -12   7   0    9.78    0.80 
  13   7   0   -0.08    0.49 
 -13  -7   0    0.30    0.29 
  13  -7   0    0.22    0.32 
  13  -7   0   -0.02    0.49 
  13   7   0    0.69    0.24 
 -13   7   0    0.18    0.44 
 -14  -7   0    0.29    0.35 
  14   7   0    0.51    0.30 
 -14   7   0    0.48    0.47 
  14   7   0    0.36    0.56 
  14  -7   0    0.46    0.65 
  15   7   0    0.82    0.35 
  15   7   0    1.84    1.26 
 -15  -7   0    0.68    0.40 
  15  -7   0    1.77    0.97 
 -15   7   0    1.08    0.47 
 -16  -7   0    1.70    0.44 
  16   7   0    2.23    0.84 
 -16   7   0    2.55    0.57 
   0  -8   0  237.22    7.92 
   0   8   0  260.32    7.88 
   0   8   0  242.21    7.96 
   0  -8   0  260.25    7.82 
  -1   8   0   -0.13    0.13 
   1   8   0   -0.05    0.11 
   1  -8   0    0.09    0.10 
   1   8   0   -0.10    0.11 
  -1   8   0    0.00    0.10 
  -1  -8   0    0.12    0.11 
   2   8   0   68.29    2.41 
   2  -8   0   68.89    2.36 
   2   8   0   67.34    2.26 
  -2  -8   0   66.59    2.37 
  -2   8   0   64.38    2.43 
  -2   8   0   68.11    2.46 
   2  -8   0   69.68    2.44 
   3  -8   0    0.12    0.11 
  -3   8   0   -0.05    0.12 
   3   8   0   -0.03    0.11 
   3  -8   0    0.13    0.13 
  -3   8   0    0.15    0.15 
   4   8   0  278.91    8.72 
  -4   8   0  279.12    8.96 
   4  -8   0  279.14    8.79 
   4  -8   0  268.54    8.78 
  -4   8   0  275.45    8.80 
   5   8   0    0.00    0.12 
  -5   8   0   -0.07    0.14 
   5  -8   0   -0.02    0.16 
  -5   8   0    0.29    0.22 
   5  -8   0    0.30    0.15 
  -6   8   0    0.79    0.22 
   6  -8   0    0.73    0.19 
   6   8   0    1.27    0.21 
   6  -8   0    0.96    0.18 
  -6   8   0    0.55    0.22 
  -6   8   0    1.18    0.21 
  -7  -8   0   -0.06    0.15 
  -7   8   0    0.08    0.16 
  -7   8   0   -0.04    0.25 
   7  -8   0    0.10    0.22 
  -7   8   0    0.68    0.28 
   7  -8   0    0.12    0.16 
   7   8   0   -0.09    0.14 
   8  -8   0    0.45    0.25 
   8   8   0    0.39    0.16 
   8  -8   0    0.29    0.18 
  -8   8   0    0.09    0.28 
  -8  -8   0    0.47    0.21 
  -8   8   0    0.68    0.31 
  -8   8   0    0.60    0.18 
  -8   8   0    0.53    0.22 
   9  -8   0    1.23    0.56 
  -9   8   0    0.67    0.32 
   9  -8   0    0.50    0.20 
  -9   8   0    0.59    0.32 
  -9   8   0    0.68    0.18 
  -9   8   0    0.35    0.21 
  -9  -8   0    0.58    0.21 
 -10  -8   0   11.87    0.75 
 -10   8   0   11.64    0.92 
  10  -8   0   11.93    0.86 
  10  -8   0   12.09    0.74 
 -10   8   0   12.61    0.86 
  10   8   0   12.19    0.63 
 -11  -8   0    0.29    0.26 
  11  -8   0    0.30    0.26 
  11   8   0    0.22    0.21 
 -11   8   0   -0.17    0.46 
 -11   8   0    0.63    0.41 
  11  -8   0    0.49    0.67 
  12  -8   0   30.12    1.38 
  12   8   0   28.59    1.21 
 -12  -8   0   28.71    1.45 
 -12   8   0   30.10    1.62 
  12  -8   0   29.41    1.54 
  12   8   0   29.48    1.47 
 -13  -8   0    0.71    0.32 
 -13   8   0    0.74    0.47 
  13  -8   0    0.25    0.34 
  13   8   0    0.46    0.51 
  13   8   0    0.13    0.27 
  13  -8   0    1.25    0.56 
  14  -8   0    8.75    0.99 
 -14  -8   0    6.77    0.64 
  14   8   0    7.67    0.55 
  14   8   0    6.03    0.89 
 -14   8   0    6.84    0.76 
 -15  -8   0    0.04    0.35 
  15   8   0    0.34    0.39 
  15   8   0    2.64    1.28 
  15  -8   0    0.70    0.74 
 -15   8   0    0.81    0.57 
  16   8   0   27.93    1.25 
  16   8   0   28.83    1.72 
 -16  -8   0   28.37    1.56 
 -16   8   0   27.10    1.69 
   0   9   0   -0.07    0.12 
   0   9   0    0.30    0.13 
   0  -9   0    0.13    0.11 
   0  -9   0    0.15    0.10 
   1  -9   0    0.20    0.11 
  -1  -9   0    0.01    0.12 
   1   9   0    0.09    0.11 
   1  -9   0    0.20    0.12 
  -1   9   0    0.21    0.16 
  -1   9   0    0.12    0.12 
   1   9   0   -0.16    0.13 
  -2   9   0   96.05    3.37 
   2  -9   0   97.96    3.25 
  -2  -9   0   95.64    3.29 
  -2   9   0   97.83    3.38 
   2   9   0   96.88    3.33 
   2  -9   0   92.12    3.33 
   2   9   0   96.35    3.16 
  -3   9   0    0.07    0.14 
   3  -9   0    0.54    0.17 
   3  -9   0    0.30    0.14 
  -3   9   0    0.07    0.16 
   3   9   0    0.06    0.14 
   4  -9   0    1.12    0.23 
  -4   9   0    1.21    0.26 
  -4   9   0    1.62    0.24 
   4   9   0    1.55    0.25 
   4  -9   0    1.03    0.24 
  -5   9   0    0.06    0.16 
   5  -9   0    0.00    0.14 
   5   9   0    0.08    0.15 
  -5   9   0   -0.22    0.22 
   5  -9   0    0.04    0.17 
  -6   9   0   54.41    2.06 
   6  -9   0   52.82    2.11 
  -6   9   0   53.51    2.29 
   6   9   0   53.11    1.98 
   6  -9   0   52.76    2.08 
  -7   9   0    0.14    0.28 
   7   9   0   -0.25    0.17 
   7  -9   0   -0.15    0.17 
  -7   9   0    0.23    0.26 
   7  -9   0   -0.11    0.25 
  -7   9   0   -0.27    0.18 
   8  -9   0   51.68    2.06 
   8   9   0   52.03    1.93 
  -8   9   0   51.93    2.00 
   8  -9   0   51.81    2.15 
  -8   9   0   51.64    2.16 
  -8   9   0   50.45    2.32 
  -8   9   0   53.05    1.98 
   9  -9   0    0.69    0.30 
   9  -9   0    0.61    0.23 
  -9   9   0    0.51    0.35 
  -9   9   0    0.29    0.34 
   9   9   0    0.00    0.19 
  -9  -9   0    0.30    0.20 
  -9   9   0    0.21    0.25 
  -9   9   0    0.54    0.21 
 -10   9   0    3.57    0.32 
 -10   9   0    3.03    0.70 
 -10   9   0    2.76    0.51 
 -10   9   0    2.66    0.36 
  10  -9   0    2.87    0.42 
  10   9   0    2.91    0.35 
 -10  -9   0    3.60    0.38 
 -11  -9   0    0.29    0.24 
  11  -9   0    0.32    0.40 
 -11   9   0    0.12    0.43 
 -11   9   0    0.36    0.51 
  11  -9   0    0.62    0.28 
  11   9   0    0.32    0.28 
  12  -9   0    0.62    0.31 
  12  -9   0    1.27    0.67 
  12   9   0    0.38    0.27 
 -12   9   0    1.20    0.48 
 -12  -9   0    0.49    0.25 
 -13   9   0    0.27    0.46 
  13   9   0    0.43    0.63 
 -13  -9   0    0.40    0.32 
  13  -9   0    0.73    0.38 
  14   9   0   25.78    1.17 
 -14   9   0   24.42    1.50 
  14   9   0   28.41    1.50 
 -14  -9   0   24.84    1.40 
  14  -9   0   26.52    1.50 
  15   9   0    1.33    1.33 
  15   9   0    0.84    0.44 
 -15   9   0   -0.19    0.58 
  15  -9   0    1.59    0.88 
 -15  -9   0    0.87    0.34 
 -16   9   0    8.59    0.89 
  16   9   0   11.34    0.84 
  16   9   0    7.35    1.32 
   0 -10   0   92.89    3.28 
   0  10   0   97.02    3.22 
   0  10   0   89.83    3.29 
  -1  10   0    0.13    0.17 
  -1 -10   0    0.09    0.13 
   1  10   0   -0.31    0.15 
   1 -10   0    0.19    0.12 
   1 -10   0    0.00    0.13 
  -1  10   0   -0.30    0.16 
   2 -10   0    0.02    0.13 
  -2  10   0    0.16    0.17 
   2 -10   0    0.20    0.14 
   2  10   0    0.09    0.12 
   2  10   0    0.05    0.15 
   3  10   0    0.53    0.17 
   3 -10   0    0.50    0.17 
  -3  10   0    0.33    0.15 
   3 -10   0    0.54    0.18 
  -3  10   0    0.26    0.20 
   4 -10   0   24.72    1.18 
   4  10   0   26.33    1.16 
   4 -10   0   26.28    1.15 
  -4  10   0   25.37    1.19 
  -4  10   0   24.82    1.25 
  -5  10   0    0.74    0.24 
  -5  10   0    0.33    0.18 
   5  10   0    0.64    0.18 
   6 -10   0   42.99    1.79 
  -6  10   0   43.15    1.98 
  -6  10   0   43.22    1.78 
   6  10   0   43.56    1.70 
   6 -10   0   43.07    1.80 
  -7  10   0    0.43    0.26 
   7  10   0    0.09    0.19 
   7 -10   0    0.16    0.20 
   7 -10   0    0.01    0.25 
  -7  10   0   -0.26    0.32 
   8  10   0   45.24    1.75 
  -8  10   0   42.80    1.91 
   8 -10   0   43.83    1.91 
  -8  10   0   44.39    1.78 
  -8  10   0   43.57    2.11 
   8 -10   0   44.78    1.85 
   9  10   0   -0.25    0.22 
   9 -10   0    0.53    0.24 
  -9  10   0   -0.03    0.25 
  -9  10   0    0.55    0.39 
  -9  10   0    0.17    0.29 
  -9  10   0    0.04    0.35 
  10 -10   0    5.02    0.49 
 -10  10   0    4.24    0.45 
  10  10   0    4.07    0.41 
 -10  10   0    2.98    0.67 
 -10  10   0    4.37    0.40 
 -10  10   0    4.17    0.55 
  11 -10   0    0.05    0.30 
  11  10   0   -0.10    0.28 
 -11  10   0    0.13    0.52 
 -11  10   0   -0.29    0.39 
  12  10   0   27.69    1.22 
  12 -10   0   26.51    1.46 
 -12 -10   0   27.58    1.38 
  12 -10   0   26.48    1.34 
 -12  10   0   25.43    1.48 
 -12  10   0   25.66    1.61 
 -13 -10   0    0.33    0.31 
 -13  10   0    0.44    0.52 
  13  10   0   -0.12    0.36 
  13 -10   0    1.02    0.59 
 -14 -10   0    2.95    0.44 
  14  10   0    2.88    0.70 
  14 -10   0    2.06    0.72 
 -14  10   0    3.76    0.61 
  14  10   0    3.44    0.58 
 -15  10   0    0.39    0.60 
  15  10   0   -0.60    1.42 
  15  10   0    0.90    0.51 
 -15 -10   0    0.46    0.35 
  16  10   0    7.35    1.38 
   0  11   0   -0.06    0.16 
   0  11   0    0.23    0.17 
   0 -11   0    0.33    0.15 
   1  11   0    0.73    0.19 
  -1 -11   0    0.60    0.17 
  -1  11   0    0.82    0.18 
   1  11   0    1.07    0.23 
  -1  11   0    0.83    0.19 
   1 -11   0    1.16    0.23 
  -2  11   0   13.92    0.81 
   2  11   0   13.71    0.77 
   2 -11   0   13.75    0.79 
  -2  11   0   14.37    0.82 
   2 -11   0   14.69    0.72 
   2  11   0   14.56    0.70 
   3  11   0    1.12    0.20 
  -3  11   0    0.95    0.22 
   3  11   0    0.47    0.20 
   3 -11   0    0.81    0.18 
   4 -11   0    1.10    0.21 
  -4  11   0    0.59    0.29 
   4  11   0    0.91    0.24 
   4 -11   0    1.06    0.26 
  -4  11   0    0.91    0.21 
  -5  11   0    0.08    0.21 
  -5  11   0    0.13    0.27 
   5 -11   0    0.13    0.19 
   5  11   0    0.03    0.19 
   5 -11   0    0.00    0.21 
   6 -11   0    4.81    0.45 
   6  11   0    4.85    0.42 
  -6  11   0    5.46    0.47 
  -6  11   0    4.20    0.55 
   6 -11   0    5.56    0.48 
   7 -11   0    0.09    0.22 
  -7  11   0   -0.01    0.28 
   7 -11   0    0.00    0.37 
   7  11   0    0.03    0.22 
  -7  11   0   -0.29    0.24 
   8  11   0    8.78    0.60 
   8 -11   0   10.76    0.75 
  -8  11   0    9.18    0.79 
   8 -11   0    9.40    0.66 
  -8  11   0    9.84    0.69 
  -8  11   0    9.09    0.62 
  -9  11   0    1.00    0.28 
  -9  11   0    1.01    0.38 
  -9  11   0    0.12    0.51 
  -9  11   0    0.90    0.33 
   9 -11   0    0.83    0.29 
   9  11   0    0.81    0.28 
  10  11   0   34.21    1.47 
 -10  11   0   34.47    1.42 
 -10  11   0   33.40    1.83 
 -10  11   0   36.33    1.45 
 -10  11   0   33.38    1.70 
  10 -11   0   33.98    1.58 
 -11  11   0   -0.56    0.59 
 -11  11   0    0.40    0.30 
 -11  11   0    0.61    0.44 
  11  11   0    0.21    0.31 
 -11  11   0    0.11    0.33 
  12 -11   0    2.87    0.59 
  12 -11   0    2.41    0.44 
 -12  11   0    2.28    0.61 
 -12  11   0    2.41    0.50 
  12  11   0    2.76    0.52 
  13 -11   0    0.49    0.68 
 -13  11   0   -0.44    0.51 
  13  11   0   -0.26    0.40 
  14  11   0    2.53    0.71 
 -14  11   0    0.69    0.55 
  14 -11   0    2.98    0.86 
  14  11   0    1.55    0.48 
  15  11   0   -0.91    1.58 
 -15  11   0    0.71    0.63 
  15  11   0    0.74    0.57 
   0 -12   0    3.84    0.37 
   0  12   0    4.12    0.40 
   0  12   0    3.63    0.36 
   1  12   0    0.00    0.17 
  -1  12   0   -0.28    0.20 
  -1 -12   0   -0.09    0.17 
   1 -12   0   -0.21    0.17 
   1 -12   0   -0.21    0.15 
  -1  12   0   -0.05    0.20 
   1  12   0   -0.07    0.20 
   2 -12   0    0.35    0.17 
  -2  12   0    0.26    0.22 
   2 -12   0    0.51    0.19 
  -2  12   0    0.33    0.23 
   2  12   0    0.39    0.21 
   2  12   0    0.47    0.22 
   3  12   0    0.13    0.21 
  -3  12   0   -0.11    0.21 
   3  12   0    0.07    0.17 
  -3  12   0   -0.32    0.24 
   3 -12   0    0.00    0.18 
   3 -12   0    0.38    0.18 
  -4  12   0    0.07    0.31 
   4  12   0    0.55    0.22 
  -4  12   0    0.44    0.23 
   4 -12   0    0.89    0.20 
   4 -12   0    0.52    0.21 
  -5  12   0    0.45    0.24 
   5  12   0   -0.05    0.23 
  -5  12   0    0.00    0.34 
   5 -12   0    0.16    0.22 
   5  12   0    0.49    0.18 
   6 -12   0   21.22    1.53 
   6  12   0   27.23    1.24 
  -6  12   0   26.03    1.41 
  -6  12   0   26.56    1.27 
   6 -12   0   26.65    1.30 
  -7  12   0    0.50    0.28 
   7 -12   0    0.96    0.29 
  -7  12   0   -0.23    0.38 
   7  12   0    0.56    0.26 
  -8  12   0    0.54    0.37 
  -8  12   0    0.09    0.30 
   8 -12   0    0.43    0.27 
   8  12   0   -0.13    0.27 
  -8  12   0   -0.03    0.53 
  -9  12   0    1.39    0.49 
  -9  12   0    0.78    0.37 
   9  12   0    0.90    0.31 
  -9  12   0    0.41    0.34 
   9 -12   0    1.46    0.36 
  -9  12   0    1.27    0.39 
 -10  12   0    2.94    0.60 
 -10  12   0    4.16    0.51 
  10 -12   0    4.63    0.51 
 -10  12   0    2.45    0.56 
  10  12   0    3.57    0.47 
 -10  12   0    3.21    0.58 
 -11  12   0    0.54    0.49 
  11  12   0    0.37    0.36 
 -11  12   0   -0.27    0.40 
 -11  12   0   -0.05    0.63 
 -11  12   0    0.44    0.37 
  11 -12   0    0.14    0.36 
  11 -12   0    0.93    0.57 
  12 -12   0   16.36    1.07 
 -12  12   0   16.04    1.26 
  12 -12   0   16.48    1.10 
  12  12   0   16.54    0.96 
 -12  12   0   15.66    1.12 
  13 -12   0    1.04    0.72 
 -13  12   0   -0.14    0.57 
  13  12   0   -0.70    0.47 
  14  12   0    6.06    0.79 
 -14  12   0    6.68    0.85 
  15  12   0    1.52    1.09 
  15  12   0    2.15    0.68 
 -15  12   0    0.70    0.63 
   0  13   0   -0.12    0.23 
   0  13   0    0.39    0.23 
   0 -13   0    0.21    0.19 
   1 -13   0    0.02    0.17 
   1  13   0   -0.02    0.23 
  -1  13   0   -0.32    0.23 
   1 -13   0    0.08    0.19 
  -1  13   0   -0.29    0.22 
  -2  13   0   62.78    2.52 
   2 -13   0   66.28    2.35 
   2  13   0   63.53    2.52 
  -2  13   0   63.76    2.55 
   2  13   0   66.06    2.35 
   2 -13   0   60.91    2.49 
  -3  13   0    0.32    0.26 
   3  13   0    0.49    0.18 
  -3  13   0   -0.18    0.26 
   3  13   0   -0.15    0.23 
   3 -13   0    0.61    0.21 
   3 -13   0    0.20    0.19 
  -4  13   0   -0.14    0.31 
   4  13   0    0.15    0.24 
   4 -13   0    0.60    0.24 
   4  13   0   -0.13    0.19 
  -4  13   0   -0.06    0.27 
  -5  13   0    0.51    0.37 
  -5  13   0    0.20    0.28 
   5  13   0    0.27    0.27 
   5 -13   0    0.58    0.32 
   5 -13   0    0.42    0.24 
   6  13   0   39.59    1.48 
   6  13   0   38.26    1.68 
  -6  13   0   38.01    1.74 
  -6  13   0   38.21    1.91 
   6 -13   0   38.78    1.66 
   6 -13   0   39.12    1.76 
   7 -13   0    0.61    0.29 
  -7  13   0    0.18    0.42 
   7 -13   0    0.37    0.31 
   8 -13   0    0.59    0.30 
   8  13   0    0.64    0.31 
  -8  13   0   -0.14    0.34 
  -8  13   0    0.49    0.39 
  -8  13   0    0.18    0.51 
   9  13   0    0.24    0.34 
  -9  13   0    0.03    0.54 
  -9  13   0    0.16    0.38 
 -10  13   0    5.06    0.88 
 -10  13   0    5.54    0.65 
  10  13   0    6.54    0.59 
 -10  13   0    6.28    0.65 
  10 -13   0    4.78    0.59 
  11 -13   0    1.07    0.57 
 -11  13   0    1.01    0.49 
 -11  13   0    1.40    0.50 
  11  13   0    1.00    0.43 
 -11  13   0    1.74    0.44 
 -11  13   0    0.48    0.75 
  12  13   0    8.38    0.79 
 -12  13   0    6.83    1.15 
 -12  13   0    9.09    0.69 
 -12  13   0    7.26    0.83 
  12 -13   0    7.85    0.98 
 -12  13   0    7.40    0.61 
 -13  13   0   -0.60    0.59 
  14  13   0    0.61    1.07 
   0 -14   0   48.99    2.06 
   0  14   0   48.72    1.99 
   0  14   0   48.87    2.09 
   1 -14   0    0.14    0.22 
  -1  14   0   -0.35    0.28 
  -1  14   0    0.13    0.27 
   1  14   0   -0.24    0.26 
   1  14   0    0.02    0.24 
   2 -14   0    7.77    0.49 
  -2  14   0    6.92    0.61 
   2  14   0    5.86    0.56 
   2  14   0    6.84    0.50 
   2 -14   0    7.35    0.60 
  -2  14   0    6.62    0.56 
  -3  14   0   -0.18    0.30 
   3  14   0    0.17    0.22 
  -3  14   0    0.02    0.30 
   3 -14   0   -0.05    0.22 
  -4  14   0   32.38    1.56 
   4 -14   0   30.39    1.68 
   4  14   0   33.81    1.33 
   4  14   0   31.61    1.50 
  -4  14   0   33.08    1.63 
   4 -14   0   31.80    1.53 
  -5  14   0    0.11    0.32 
  -5  14   0   -0.29    0.42 
   5  14   0   -0.35    0.30 
   5 -14   0    0.00    0.28 
   5  14   0   -0.11    0.24 
   6  14   0    0.17    0.31 
   6 -14   0    0.95    0.34 
  -6  14   0    0.46    0.34 
   6 -14   0    1.52    0.30 
  -6  14   0    0.80    0.47 
   7  14   0    0.19    0.26 
  -7  14   0   -0.39    0.37 
   7 -14   0    0.44    0.31 
   7  14   0   -0.38    0.34 
   8 -14   0    6.41    0.60 
  -8  14   0    6.43    0.81 
  -8  14   0    7.26    0.63 
   8  14   0    4.97    0.57 
  -8  14   0    4.40    0.59 
   8 -14   0    6.08    0.96 
   9 -14   0    0.66    0.35 
   9 -14   0    1.14    0.46 
  -9  14   0    0.55    0.58 
  -9  14   0    0.94    0.45 
  -9  14   0    0.63    0.44 
   9  14   0    0.38    0.39 
 -10  14   0    5.53    0.78 
 -10  14   0    5.99    0.72 
  10 -14   0    6.26    0.78 
 -10  14   0    6.05    0.70 
 -11  14   0    0.73    0.80 
 -11  14   0    0.16    0.57 
 -11  14   0    0.75    0.58 
 -11  14   0    0.63    0.51 
  11 -14   0    0.18    0.46 
  11  14   0    0.51    0.56 
  11 -14   0    1.38    0.61 
 -12  14   0    3.15    0.64 
  12 -14   0    5.24    1.02 
  12  14   0    3.62    0.76 
 -12  14   0    3.69    0.71 
 -12  14   0    4.27    0.77 
 -12  14   0    3.16    0.90 
 -13  14   0   -0.50    0.67 
 -13  14   0    0.61    1.02 
  13  14   0   -0.89    0.60 
  14  14   0    5.74    0.99 
  14  14   0    4.88    0.94 
 -14  14   0    3.87    0.68 
   0  15   0   -0.01    0.32 
   0  15   0   -0.34    0.29 
   1  15   0    0.54    0.27 
  -1  15   0    0.22    0.31 
   1  15   0   -0.45    0.36 
  -1  15   0    0.66    0.44 
   1 -15   0    0.74    0.25 
   2 -15   0    0.26    0.27 
   2  15   0   -0.02    0.26 
  -2  15   0   -0.12    0.31 
   2  15   0    0.32    0.38 
   2 -15   0    0.35    0.24 
   3  15   0   -0.30    0.53 
   3 -15   0    0.38    0.27 
  -3  15   0    0.83    0.35 
  -3  15   0    0.46    0.39 
   3  15   0    0.88    0.27 
  -4  15   0    1.29    0.39 
  -4  15   0    2.49    0.47 
   4 -15   0    2.11    0.39 
   4  15   0    1.60    0.44 
   4 -15   0    2.06    0.40 
   4  15   0    1.62    0.35 
   5 -15   0    1.05    0.30 
   5 -15   0    0.67    0.30 
  -5  15   0    0.21    0.37 
  -5  15   0    1.25    0.43 
   5  15   0    0.94    0.26 
   5  15   0    0.87    0.36 
   6 -15   0    2.41    0.47 
   6  15   0    1.95    0.42 
   6  15   0    2.33    0.44 
  -6  15   0    2.39    0.55 
   7 -15   0    1.25    0.35 
   7  15   0    2.01    0.44 
  -8  15   0   46.72    2.16 
   8  15   0   49.64    2.09 
  -8  15   0   50.05    2.42 
   8 -15   0   48.55    2.04 
   8 -15   0   44.28    2.09 
   8  15   0   49.24    1.81 
  -8  15   0   44.16    2.30 
   9 -15   0    0.09    0.50 
  -9  15   0   -0.01    0.69 
  -9  15   0    1.21    0.49 
   9 -15   0    1.26    0.41 
   9  15   0    0.11    0.45 
   9  15   0    0.59    0.37 
  -9  15   0    1.69    0.57 
  10 -15   0   62.43    2.54 
 -10  15   0   60.25    2.72 
  10 -15   0   55.89    2.55 
 -10  15   0   63.92    2.48 
 -10  15   0   57.81    2.48 
  10  15   0   63.16    2.50 
 -10  15   0   57.41    2.82 
 -11  15   0    1.38    0.60 
 -11  15   0   -0.11    0.55 
 -11  15   0    0.84    0.83 
  11  15   0    1.49    0.58 
  11 -15   0   -0.18    0.69 
 -11  15   0    0.80    0.69 
 -12  15   0    8.24    0.87 
 -12  15   0    7.65    0.96 
 -12  15   0    6.68    1.12 
  12  15   0    7.25    0.80 
 -13  15   0   -0.04    1.05 
 -13  15   0   -0.96    0.63 
  13  15   0   -0.40    1.31 
   0  16   0   73.00    2.84 
   1  16   0    0.35    0.36 
   1  16   0   -0.08    0.32 
  -1  16   0   -0.09    0.36 
  -2  16   0   12.05    0.86 
   2  16   0   11.84    0.73 
  -2  16   0   11.53    0.86 
   2 -16   0   12.60    0.83 
   2  16   0   12.46    0.86 
   3 -16   0    0.08    0.30 
  -3  16   0   -0.10    0.39 
   3  16   0    0.25    0.37 
  -3  16   0   -0.34    0.40 
   3  16   0    0.20    0.30 
   3 -16   0    0.24    0.28 
   4 -16   0   21.38    1.06 
  -4  16   0   21.63    1.24 
   4  16   0   19.72    1.19 
  -4  16   0   22.57    1.26 
   4  16   0   21.24    1.02 
   4 -16   0   21.70    1.21 
   5  16   0   -0.19    0.29 
   5  16   0    0.38    0.40 
  -5  16   0   -0.13    0.42 
  -5  16   0    0.12    0.48 
   5 -16   0    0.26    0.33 
   6  16   0    3.41    0.48 
  -6  16   0    3.60    0.59 
   6 -16   0    3.20    0.55 
   6  16   0    3.92    0.46 
  -6  16   0    3.43    0.64 
   7 -16   0   -0.39    0.43 
   7  16   0    0.97    0.45 
  -7  16   0   -0.31    0.47 
  -7  16   0    0.14    0.60 
   7 -16   0    0.18    0.38 
   8 -16   0    9.32    0.84 
   8  16   0   12.78    0.87 
  -8  16   0   11.04    1.12 
   8  16   0   13.28    0.76 
  -8  16   0   11.40    0.88 
  -8  16   0   11.54    0.86 
   8 -16   0   11.71    0.95 
   9 -16   0    1.02    0.57 
  -9  16   0    0.62    0.79 
   9 -16   0    0.52    0.46 
  -9  16   0    1.31    0.58 
  -9  16   0    0.66    0.50 
   9  16   0    0.64    0.53 
   9  16   0    1.03    0.43 
 -10  16   0    6.20    0.91 
 -10  16   0    3.66    0.81 
 -10  16   0    4.05    0.72 
 -10  16   0    4.22    0.96 
  10  16   0    4.49    0.66 
 -11  16   0    0.35    0.78 
  11  16   0   -0.28    0.66 
 -11  16   0    0.48    0.59 
 -11  16   0    1.84    0.73 
 -11  16   0    1.13    0.96 
  11  16   0    1.36    0.53 
 -12  16   0    4.91    0.75 
 -12  16   0    4.09    0.81 
 -12  16   0    3.03    1.04 
 -12  16   0    3.96    0.76 
   0  17   0   -0.45    0.39 
  -1  17   0   -0.19    0.39 
   2  17   0    2.51    0.39 
  -2  17   0    2.24    0.49 
   2  17   0    2.52    0.84 
   3  17   0   -0.01    0.35 
   3 -17   0    0.65    0.31 
  -3  17   0    0.33    0.52 
   3  17   0    0.03    0.79 
  -4  17   0   21.94    1.27 
   4 -17   0   19.82    1.17 
   4  17   0   20.16    1.03 
   5  17   0    0.50    0.55 
   5 -17   0   -0.16    0.38 
   6  17   0    1.48    0.36 
   6 -17   0    1.82    0.42 
   6  17   0    1.69    0.51 
   6 -17   0    1.33    0.42 
  -6  17   0    1.94    0.66 
  -7  17   0    1.32    0.70 
   7  17   0    1.27    0.52 
   7 -17   0    2.86    0.63 
   7  17   0    1.88    0.39 
   8 -17   0    1.36    0.53 
   8  17   0    0.40    0.43 
  -8  17   0    1.27    0.83 
   8  17   0    0.39    0.55 
  -9  17   0    1.05    0.57 
   9 -17   0    2.20    0.62 
   9  17   0    4.27    0.85 
   9  17   0    2.42    0.50 
  10  17   0   10.88    0.85 
  10 -17   0   11.87    1.59 
  10  17   0    8.77    1.04 
 -10  17   0    8.73    0.86 
 -10  17   0    9.91    1.37 
 -10  17   0    9.64    1.15 
 -11  17   0    2.00    0.83 
 -11  17   0    2.31    0.73 
  11  17   0    1.88    0.75 
 -11  17   0    3.27    1.14 
 -11  17   0    1.86    0.89 
 -12  17   0    1.49    1.15 
  12  17   0    0.93    0.65 
 -12  17   0    2.71    1.01 
 -12  17   0    1.89    0.74 
 -12  17   0   -1.01    1.21 
   0  18   0   -0.24    0.46 
   1  18   0   -0.37    0.49 
  -1  18   0   -0.78    0.47 
   2  18   0   27.71    1.45 
  -2  18   0   27.10    1.47 
  -2  18   0   23.94    1.83 
   2  18   0   28.31    1.35 
  -3  18   0    0.22    0.55 
   3  18   0    0.13    0.40 
   3  18   0    0.17    0.51 
   4  18   0    3.49    0.72 
   4 -18   0    2.14    0.45 
   4  18   0    1.80    0.40 
  -4  18   0    1.90    0.55 
   5  18   0   -0.14    0.41 
   5  18   0    0.44    0.54 
  -5  18   0    1.13    0.70 
  -5  18   0    0.20    0.56 
   6 -18   0   25.75    1.31 
  -6  18   0   27.26    1.50 
  -6  18   0   26.33    1.60 
   6  18   0   28.56    1.49 
   6  18   0   28.68    1.26 
   7  18   0    0.76    0.62 
  -7  18   0    0.79    0.64 
   7 -18   0    0.87    0.50 
   7  18   0    0.33    0.42 
  -7  18   0    1.30    0.84 
  -8  18   0  114.81    4.25 
   8 -18   0  105.46    4.04 
   8  18   0  111.32    3.85 
  -8  18   0  111.50    4.58 
   8  18   0  111.77    4.25 
  -9  18   0    1.12    0.59 
   9 -18   0    0.95    0.74 
  -9  18   0   -0.51    1.04 
  -9  18   0    1.07    0.77 
   9  18   0    0.54    0.50 
  10  18   0   13.42    1.30 
 -10  18   0   14.79    1.33 
 -10  18   0   16.27    1.38 
 -10  18   0   15.68    1.10 
  10  18   0   12.00    1.02 
 -10  18   0   14.97    1.59 
 -11  18   0    0.76    0.68 
  11  18   0   -0.85    0.87 
 -11  18   0    0.91    1.07 
 -11  18   0   -0.18    1.20 
  11  18   0    0.59    0.73 
   0  19   0    0.72    0.57 
   1  19   0    0.40    0.58 
  -1  19   0    0.91    0.58 
   1  19   0    1.13    0.49 
  -1  19   0    0.03    0.55 
   2  19   0   52.83    2.20 
  -2  19   0   52.29    2.35 
   2  19   0   52.33    2.36 
  -2  19   0   53.84    2.47 
  -3  19   0    2.24    0.63 
   3  19   0    2.46    0.49 
   3  19   0    1.67    0.60 
  -3  19   0    2.00    0.61 
   4  19   0    0.15    0.62 
   4  19   0   -0.24    0.46 
  -4  19   0    0.66    0.71 
  -4  19   0   -0.60    0.63 
   4 -19   0    0.21    0.47 
   5  19   0    2.60    0.71 
   5  19   0    2.88    0.62 
  -5  19   0    2.50    0.67 
   5 -19   0    3.35    0.68 
  -6  19   0    2.22    0.83 
   6  19   0    1.12    0.50 
  -6  19   0    0.90    0.71 
   6  19   0    0.94    0.66 
   7  19   0    4.24    0.56 
  -7  19   0    5.37    1.06 
   7 -19   0    3.66    0.62 
   7  19   0    4.80    1.01 
  -8  19   0    2.69    0.82 
  -8  19   0    1.96    0.98 
   8  19   0    2.10    0.76 
   9  19   0    0.90    0.58 
  -9  19   0    0.39    1.00 
   9  19   0    1.14    0.87 
  -9  19   0    1.30    0.61 
  -9  19   0    1.51    1.08 
 -10  19   0    2.59    1.09 
 -10  19   0    2.47    1.19 
  10  19   0   -0.40    0.64 
 -10  19   0    0.81    0.67 
  10  19   0    0.84    0.91 
 -10  19   0    1.56    1.03 
   0  20   0    2.52    0.61 
   0  20   0    3.60    0.68 
   1  20   0    0.19    0.65 
  -1  20   0    1.22    0.70 
   1  20   0   -0.92    0.57 
  -1  20   0    0.37    0.65 
   2  20   0   41.38    1.99 
  -2  20   0   37.41    1.89 
  -2  20   0   44.75    2.32 
   2  20   0   34.21    2.15 
   3  20   0   -0.71    0.64 
  -3  20   0    0.45    0.72 
   3  20   0   -0.60    0.69 
  -3  20   0   -0.19    0.70 
   4  20   0   10.94    1.11 
   4  20   0   10.38    0.85 
  -4  20   0   10.29    1.33 
  -4  20   0   12.20    1.14 
   5  20   0    2.14    0.75 
   5 -20   0    0.84    0.56 
  -5  20   0   -0.08    0.93 
  -6  20   0   14.68    1.23 
   6  20   0   11.55    0.90 
   6  20   0   14.46    1.22 
  -6  20   0   12.56    1.34 
   6 -20   0    9.91    1.01 
   7  20   0    1.73    0.85 
   7 -20   0   -0.20    0.75 
  -7  20   0   -1.26    1.02 
  -7  20   0    0.49    0.85 
   7  20   0    1.08    0.61 
  -8  20   0    9.82    1.33 
   8  20   0    9.37    1.42 
  -8  20   0    8.06    1.59 
   8  20   0    7.39    0.92 
  -9  20   0    0.90    1.08 
   9  20   0    0.60    0.97 
  -9  20   0   -0.37    1.25 
   0  21   0    1.10    0.83 
   0  21   0    0.92    0.72 
   1  21   0    1.45    0.67 
  -1  21   0    1.39    0.77 
   1  21   0    1.92    0.80 
  -1  21   0    0.75    0.81 
   2  21   0   13.70    1.03 
  -2  21   0   13.01    1.32 
  -2  21   0   14.94    1.22 
  -3  21   0    0.82    0.85 
  -3  21   0    1.31    0.89 
   3  21   0    0.99    0.81 
   3  21   0    0.32    0.67 
  -4  21   0    2.62    0.88 
   4  21   0    4.16    0.86 
   4  21   0    3.69    0.85 
  -5  21   0    1.79    0.92 
   5  21   0    2.14    0.91 
   5  21   0    2.28    0.70 
  -5  21   0    2.18    1.05 
   6  21   0    1.57    0.84 
   6  21   0    1.17    0.98 
  -6  21   0    1.07    1.10 
  -6  21   0    2.44    0.99 
  -7  21   0    3.05    1.16 
  -7  21   0    2.67    1.02 
   7  21   0    0.05    1.02 
   0  22   0   11.39    1.14 
   0  22   0   11.54    2.10 
  -1  22   0    0.71    0.88 
   1  22   0   -0.70    0.80 
   2  22   0   14.69    1.12 
  -2  22   0   10.86    1.30 
  -3  22   0    0.86    0.96 
   3  22   0    1.29    0.77 
  -4  22   0   41.51    2.18 
   4  22   0   39.08    1.83 
  -5  22   0    2.50    1.21 
   5  22   0   -0.78    0.82 
   0  23   0   -0.65    1.00 
   1  23   0    1.93    0.95 
  -1  23   0    3.19    1.03 
   2  23   0    3.05    0.92 
  -2  23   0    3.70    1.08 
  -2   0   1   -1.06    0.06 
  -2   0  -1   -0.96    0.05 
  -2   0   1   -1.01    0.03 
  -2   0   1   -0.95    0.02 
  -2   0  -1   -0.98    0.05 
   2   0   1   -0.99    0.04 
   3   0   1    0.00    0.07 
  -3   0  -1    0.13    0.08 
  -3   0  -1   -0.09    0.07 
  -3   0   1    0.03    0.09 
   4   0  -1   -0.11    0.04 
   4   0  -1    0.02    0.04 
  -4   0   1    0.02    0.12 
  -4   0  -1   -0.06    0.09 
   4   0   1   -0.08    0.08 
  -4   0  -1   -0.06    0.10 
   5   0   1   -0.08    0.11 
  -5   0   1   -0.02    0.13 
   5   0  -1   -0.19    0.10 
   5   0  -1   -0.02    0.04 
   6   0   1   -0.16    0.13 
  -6   0   1    0.25    0.16 
   6   0  -1    0.07    0.05 
  -6   0  -1    0.11    0.14 
   6   0  -1    0.13    0.14 
   7   0  -1   -0.10    0.17 
   7   0   1   -0.10    0.16 
  -7   0  -1   -0.29    0.17 
   7   0  -1   -0.01    0.08 
  -7   0   1    0.20    0.21 
  -8   0   1   -0.28    0.20 
   8   0  -1    0.00    0.09 
  -8   0  -1    0.02    0.20 
   8   0  -1    0.20    0.20 
   8   0   1   -0.18    0.18 
  -9   0   1    0.03    0.24 
   9   0  -1   -0.09    0.22 
   9   0   1   -0.23    0.22 
   9   0  -1    0.18    0.12 
  -9   0  -1   -0.01    0.23 
  10   0  -1    0.19    0.14 
  10   0  -1    0.28    0.26 
  10   0   1    0.34    0.25 
 -10   0  -1   -0.01    0.23 
 -10   0   1    0.10    0.27 
 -11   0  -1   -0.32    0.26 
 -11   0   1    0.42    0.28 
  11   0  -1    0.35    0.35 
  11   0  -1    0.27    0.17 
  11   0   1    0.06    0.29 
 -12   0   1   -0.29    0.33 
  12   0  -1   -0.07    0.20 
  12   0  -1    0.18    0.47 
 -12   0  -1    0.06    0.30 
  13   0   1    0.77    0.40 
 -13   0  -1    0.34    0.37 
  13   0  -1    0.13    0.23 
 -13   0   1    0.78    0.33 
  13   0  -1    0.51    0.41 
 -14   0   1    0.02    0.36 
  14   0   1    0.27    0.50 
  14   0  -1    0.48    0.50 
 -14   0  -1    0.20    0.36 
  15   0   1    0.35    0.56 
  15   0  -1    0.69    0.64 
 -15   0  -1    0.69    0.45 
 -15   0   1   -0.27    0.45 
  16   0  -1    1.82    0.79 
  16   0   1    1.07    0.68 
 -16   0  -1    0.02    0.42 
 -16   0   1   -0.02    0.45 
  17   0  -1    1.16    0.88 
  17   0   1    0.87    0.86 
 -17   0   1    0.37    0.45 
 -17   0  -1    0.28    0.52 
  -2   1   1   85.76    2.58 
  -2   1   1   80.12    2.52 
   2  -1   1   77.12    2.55 
  -2  -1  -1   82.09    2.52 
   2  -1   1   81.03    2.49 
   2   1  -1   77.55    2.47 
  -2   1   1   76.37    2.48 
  -2  -1   1   81.80    2.57 
  -2  -1   1   76.83    2.45 
  -2   1  -1   80.41    2.46 
  -2   1  -1   87.40    2.54 
   2   1   1   75.97    2.50 
   2  -1  -1   74.86    2.59 
  -2   1  -1   76.72    2.56 
   2  -1  -1   79.20    2.53 
   3  -1   1  326.71   10.42 
   3  -1   1  323.00   10.28 
  -3  -1  -1  362.67   10.42 
   3   1  -1  288.29   10.26 
  -3   1   1  341.29   10.31 
  -3   1   1  375.40   10.48 
  -3  -1   1  365.27   10.46 
   3  -1  -1  300.54   10.30 
   3  -1  -1  329.65   10.49 
  -3   1  -1  338.17   10.45 
   3  -1  -1  344.14   10.35 
   3   1   1  330.30   10.39 
  -3   1  -1  370.48   10.43 
   4  -1   1   44.13    1.62 
  -4  -1  -1   45.01    1.59 
  -4   1   1   46.32    1.64 
  -4  -1   1   45.79    1.64 
   4   1   1   43.71    1.59 
   4  -1  -1   46.10    1.51 
   4  -1  -1   41.38    1.65 
   4  -1  -1   43.93    1.46 
  -4   1  -1   45.87    1.60 
  -4   1  -1   41.49    1.63 
   5  -1   1   95.02    3.24 
  -5  -1  -1  101.09    3.23 
  -5   1   1   99.56    3.28 
   5  -1  -1   92.57    3.29 
  -5   1  -1   92.76    3.26 
   5  -1  -1   92.23    3.01 
   5  -1  -1   95.88    3.06 
  -5  -1   1   97.65    3.26 
   5   1   1   93.59    3.21 
  -6   1   1   22.07    0.99 
  -6  -1  -1   20.91    0.95 
   6  -1   1   20.42    0.97 
   6  -1  -1   21.48    0.81 
   6   1   1   19.41    0.93 
   6  -1  -1   21.14    0.76 
   6  -1  -1   19.95    1.00 
  -6   1  -1   21.50    0.95 
   7  -1   1   56.20    2.16 
  -7  -1  -1   56.84    2.13 
   7   1  -1   55.87    2.19 
  -7   1   1   57.93    2.19 
  -7   1  -1   55.51    2.30 
   7  -1  -1   55.87    1.91 
   7  -1  -1   55.75    2.21 
  -7  -1   1   56.68    2.17 
   7  -1  -1   55.83    1.85 
   7   1   1   55.73    2.13 
   8  -1   1    2.38    0.32 
  -8   1   1    2.59    0.32 
  -8  -1  -1    2.68    0.32 
   8   1  -1    2.33    0.17 
   8   1  -1    2.60    0.34 
   8  -1  -1    2.54    0.19 
   8  -1  -1    2.53    0.36 
   8  -1  -1    2.00    0.21 
  -8  -1   1    2.88    0.33 
  -8   1  -1    2.53    0.32 
   8   1   1    2.47    0.31 
   9   1  -1   56.33    2.35 
  -9   1   1   57.28    2.35 
  -9  -1  -1   56.99    2.29 
   9  -1   1   58.38    2.32 
  -9   1  -1   58.29    2.31 
  -9  -1   1   58.85    2.35 
   9   1   1   60.29    2.32 
   9  -1  -1   59.38    2.39 
   9  -1  -1   57.41    2.01 
  10   1  -1    2.11    0.43 
  10   1  -1    2.40    0.22 
 -10  -1  -1    2.23    0.36 
 -10   1   1    2.48    0.39 
  10  -1   1    2.71    0.41 
 -10   1  -1    2.45    0.38 
  10  -1  -1    3.44    0.45 
  10   1   1    2.60    0.40 
  10  -1  -1    2.36    0.26 
 -10  -1   1    2.92    0.39 
  11   1  -1   50.71    1.80 
 -11   1   1   50.83    2.25 
  11  -1   1   50.74    2.19 
 -11  -1  -1   52.37    2.23 
  11  -1   1   49.82    1.74 
  11   1  -1   51.25    2.25 
  11  -1  -1   53.75    1.87 
 -11  -1   1   52.49    2.25 
  11   1   1   51.72    2.18 
 -11   1  -1   52.50    2.22 
  11  -1  -1   50.70    2.25 
  12   1  -1    0.64    0.19 
  12  -1   1    0.37    0.41 
 -12  -1  -1    1.10    0.35 
 -12   1   1    0.56    0.35 
  12   1  -1    1.08    0.48 
  12  -1  -1    0.47    0.21 
  12   1   1    0.92    0.35 
  12  -1  -1    0.23    0.36 
 -12   1  -1   -0.15    0.31 
 -12  -1   1    0.63    0.31 
  13  -1   1    4.50    0.31 
  13   1  -1    3.90    0.36 
 -13   1   1    3.85    0.55 
 -13  -1  -1    3.73    0.52 
  13   1  -1    3.58    0.66 
  13  -1   1    4.12    0.63 
 -13  -1   1    4.41    0.52 
 -13   1  -1    4.64    0.53 
  13  -1  -1    3.72    0.65 
  13   1   1    4.51    0.63 
  14   1  -1    2.67    0.39 
 -14   1   1    4.09    0.54 
 -14  -1  -1    2.54    0.48 
  14   1  -1    2.80    0.97 
  14  -1   1    4.29    0.93 
 -14  -1   1    2.79    0.52 
 -14   1  -1    3.02    0.54 
  14  -1  -1    3.40    0.66 
  14   1   1    3.35    0.56 
  15   1  -1   18.23    1.37 
 -15   1   1   18.57    1.25 
  15   1  -1   19.69    0.90 
  15  -1   1   19.57    1.29 
 -15  -1  -1   17.53    1.18 
  15  -1  -1   20.03    1.35 
 -15   1  -1   16.83    1.16 
  15   1   1   20.34    1.29 
 -15  -1   1   17.96    1.22 
 -16   1   1    3.42    0.65 
  16  -1   1    5.72    0.99 
 -16  -1  -1    3.62    0.60 
  16   1  -1    5.13    0.75 
 -16  -1   1    4.11    0.61 
 -16   1  -1    3.86    0.63 
  16  -1  -1    4.87    1.07 
  16   1   1    4.95    0.77 
 -17  -1  -1    6.30    0.73 
  17  -1   1    8.52    1.25 
 -17   1   1    7.61    0.83 
  17   1  -1    9.23    1.36 
 -17  -1   1    7.78    0.79 
 -17   1  -1    7.24    0.80 
  17   1   1    7.92    1.25 
  17  -1  -1    8.83    1.30 
   0   2  -1    6.73    0.28 
   0   2   1    6.47    0.27 
   0  -2   1    7.47    0.32 
   0   2  -1    6.89    0.31 
   0  -2  -1    6.47    0.27 
   1   2  -1  160.40    5.07 
  -1   2   1  159.93    5.08 
   1  -2   1  164.90    5.07 
   1  -2   1  162.72    5.08 
  -1   2   1  159.81    5.11 
  -1  -2   1  175.73    5.06 
  -1   2  -1  164.86    5.09 
  -1  -2   1  163.72    5.06 
  -1   2  -1  168.42    5.09 
   1  -2  -1  157.22    5.10 
  -2   2   1    0.26    0.08 
  -2   2   1    0.37    0.07 
   2   2  -1    0.20    0.06 
   2  -2   1    0.15    0.06 
  -2   2   1    0.29    0.08 
   2  -2   1    0.35    0.10 
  -2  -2  -1    0.25    0.06 
  -2   2   1    0.11    0.07 
  -2   2  -1    0.16    0.09 
  -2   2  -1    0.24    0.07 
  -2   2  -1    0.21    0.07 
  -2  -2   1    0.32    0.06 
  -2  -2   1    0.12    0.06 
   2  -2  -1    0.12    0.07 
   2  -2  -1    0.18    0.07 
  -3   2   1  120.02    3.87 
  -3   2   1  123.59    3.91 
  -3   2   1  117.95    4.04 
  -3  -2  -1  127.98    3.94 
   3   2  -1  122.53    3.84 
  -3   2   1  128.62    3.99 
   3  -2   1  121.54    3.98 
   3  -2   1  124.18    3.88 
  -3   2  -1  132.89    3.97 
   3  -2  -1  121.15    3.89 
  -3   2  -1  121.16    4.01 
  -3   2  -1  126.16    3.86 
   4   2  -1    6.12    0.26 
  -4   2   1    5.66    0.41 
  -4  -2  -1    5.86    0.35 
  -4   2   1    5.85    0.28 
   4  -2   1    5.95    0.39 
  -4   2   1    5.88    0.30 
   4  -2   1    6.14    0.30 
  -4   2   1    6.27    0.38 
  -4   2  -1    6.02    0.41 
  -4  -2   1    5.53    0.41 
   4  -2  -1    6.03    0.31 
   4  -2  -1    5.90    0.41 
   4  -2  -1    5.62    0.31 
  -4   2  -1    6.07    0.36 
  -5  -2  -1   10.91    0.55 
   5  -2   1   10.69    0.59 
  -5   2   1   11.44    0.60 
   5  -2   1   11.00    0.45 
  -5   2  -1   10.96    0.64 
  -5  -2   1   10.43    0.57 
   5  -2  -1   10.19    0.48 
   5  -2  -1   10.56    0.46 
  -5   2  -1    9.60    0.60 
   5  -2  -1   10.00    0.60 
   5   2   1   10.96    0.56 
   6  -2   1    0.56    0.19 
  -6   2   1    0.06    0.17 
   6  -2   1    0.39    0.08 
  -6  -2  -1    0.44    0.15 
   6  -2  -1    0.44    0.17 
  -6   2  -1    0.47    0.16 
  -6   2  -1    0.25    0.15 
   6   2   1    0.13    0.12 
   6  -2  -1    0.62    0.11 
   6  -2  -1    0.33    0.10 
   7  -2   1   77.99    2.52 
  -7  -2  -1   80.34    2.80 
   7  -2   1   76.43    2.83 
  -7   2   1   79.17    2.86 
   7   2   1   76.47    2.78 
   7  -2  -1   76.09    2.55 
  -7   2  -1   73.32    2.86 
  -7   2  -1   81.64    2.87 
   7  -2  -1   77.09    2.89 
   7  -2  -1   79.17    2.61 
   8  -2   1   51.22    2.06 
   8  -2   1   51.44    1.73 
   8   2  -1   50.09    2.07 
  -8   2   1   52.38    2.09 
  -8  -2  -1   51.90    2.02 
   8   2   1   50.24    2.09 
  -8  -2   1   51.37    2.06 
  -8   2  -1   51.50    2.04 
   8  -2  -1   49.77    2.10 
   8  -2  -1   52.10    1.82 
   8  -2  -1   50.40    1.76 
   9  -2   1    9.07    0.42 
   9  -2   1    8.18    0.62 
  -9   2   1    8.47    0.64 
  -9  -2  -1    9.28    0.60 
   9   2  -1    8.33    0.63 
   9  -2  -1    9.08    0.45 
   9   2   1    9.00    0.62 
   9  -2  -1    8.88    0.48 
  -9  -2   1    8.79    0.62 
   9  -2  -1    8.62    0.64 
  -9   2  -1    9.40    0.63 
  10  -2   1    2.99    0.25 
 -10  -2  -1    3.54    0.41 
 -10   2   1    3.57    0.43 
  10  -2   1    3.09    0.43 
  10   2  -1    2.94    0.44 
 -10  -2   1    3.45    0.42 
 -10   2  -1    3.38    0.43 
  10  -2  -1    3.11    0.47 
  10   2   1    3.30    0.42 
  11   2  -1   26.78    1.40 
 -11  -2  -1   28.84    1.40 
  11  -2   1   27.09    1.05 
 -11   2   1   27.37    1.43 
  11  -2   1   26.95    1.39 
  11  -2  -1   25.97    1.42 
  11   2   1   28.28    1.38 
 -11   2  -1   26.67    1.37 
 -11  -2   1   27.92    1.43 
 -12   2   1   24.21    1.33 
  12  -2   1   24.10    0.97 
  12   2  -1   23.47    1.34 
  12  -2   1   23.78    1.36 
 -12  -2  -1   24.85    1.32 
  12   2  -1   23.90    0.96 
  12  -2  -1   24.80    1.36 
 -12  -2   1   24.81    1.38 
  12   2   1   25.67    1.31 
 -12   2  -1   23.92    1.32 
  13   2  -1   11.89    0.96 
  13  -2   1   12.46    0.60 
 -13   2   1   12.11    0.93 
  13  -2   1   11.95    0.90 
 -13  -2  -1   12.14    0.88 
 -13  -2   1   13.02    0.93 
  13  -2  -1   12.30    0.96 
 -13   2  -1   12.71    0.92 
 -14   2   1   14.80    1.05 
 -14  -2  -1   15.48    1.02 
  14   2  -1   16.46    1.34 
  14  -2   1   15.18    1.08 
  14   2  -1   14.47    0.71 
  14  -2  -1   15.58    1.16 
 -14  -2   1   13.72    1.01 
 -14   2  -1   14.07    0.99 
  14   2   1   12.89    1.04 
  15  -2   1    0.19    0.58 
 -15   2   1    0.65    0.42 
  15   2  -1    1.03    0.62 
 -15  -2  -1    0.45    0.38 
 -15  -2   1    0.10    0.36 
 -15   2  -1   -0.25    0.41 
  15   2   1    0.74    0.58 
  15  -2  -1   -0.62    0.63 
  16   2  -1    0.30    0.73 
  16   2  -1    1.09    0.39 
 -16  -2  -1    0.36    0.42 
  16  -2   1    1.21    0.74 
 -16   2   1    1.11    0.49 
  16   2   1    0.55    0.70 
 -16  -2   1    0.84    0.41 
 -16   2  -1    0.79    0.49 
  17  -2   1    5.58    1.25 
  17   2  -1    5.44    0.96 
 -17   2   1    3.40    0.57 
 -17  -2  -1    4.19    0.64 
  17  -2  -1    4.26    0.98 
 -17  -2   1    3.64    0.61 
 -17   2  -1    4.63    0.72 
   0   3  -1   -0.05    0.05 
   0  -3   1   -0.03    0.05 
   0   3  -1    0.03    0.06 
   0  -3  -1    0.03    0.05 
   0   3   1    0.07    0.05 
   0   3   1   -0.08    0.05 
  -1   3   1  144.21    4.61 
   1  -3   1  150.39    4.60 
   1   3  -1  144.96    4.61 
  -1   3   1  146.74    4.63 
   1  -3   1  149.12    4.62 
  -1   3  -1  144.80    4.62 
   1   3   1  151.81    4.51 
   1  -3  -1  145.97    4.62 
   1  -3  -1  144.05    4.61 
  -1   3  -1  150.81    4.62 
  -1  -3   1  147.89    4.60 
   2  -3   1   10.89    0.50 
   2  -3   1   11.36    0.49 
   2   3  -1   10.85    0.46 
  -2   3   1   10.76    0.48 
  -2   3   1   10.45    0.53 
  -2  -3   1   10.95    0.46 
  -2   3  -1   10.72    0.52 
   2  -3  -1   10.46    0.52 
   2  -3  -1   10.84    0.49 
  -2   3  -1   10.80    0.48 
  -2  -3   1   10.72    0.44 
   3   3  -1    6.72    0.32 
  -3   3   1    6.99    0.35 
  -3   3   1    6.67    0.42 
  -3  -3  -1    7.46    0.35 
  -3   3   1    6.54    0.36 
   3  -3   1    6.64    0.39 
   3  -3   1    7.16    0.36 
  -3   3  -1    6.54    0.41 
   3  -3  -1    7.01    0.36 
   3  -3  -1    6.34    0.40 
  -3  -3   1    7.27    0.28 
  -3   3  -1    6.89    0.34 
  -3   3  -1    6.84    0.34 
  -4   3   1   47.48    1.79 
  -4   3   1   46.42    1.55 
   4  -3   1   46.44    1.57 
  -4   3   1   45.61    1.58 
   4  -3   1   44.51    1.67 
   4   3  -1   45.94    1.50 
  -4   3   1   43.71    1.74 
   4  -3  -1   43.80    1.57 
  -4   3  -1   46.45    1.54 
   4  -3  -1   43.96    1.72 
  -4  -3   1   45.59    1.64 
  -4   3  -1   47.81    1.64 
  -4   3  -1   44.35    1.72 
  -5   3   1   30.27    1.04 
  -5   3   1   28.03    1.28 
  -5  -3  -1   30.33    1.17 
  -5   3   1   29.92    1.08 
   5   3  -1   29.61    1.01 
   5  -3   1   31.01    1.09 
   5  -3   1   29.24    1.23 
  -5   3   1   30.17    1.22 
   5  -3  -1   28.55    1.26 
   5  -3  -1   28.56    1.09 
  -5  -3   1   28.89    1.19 
  -5   3  -1   29.12    1.00 
  -5   3  -1   31.77    1.21 
  -6  -3  -1    1.49    0.28 
   6  -3   1    1.77    0.24 
   6   3  -1    1.54    0.12 
   6  -3   1    1.52    0.15 
  -6   3  -1    1.74    0.25 
  -6  -3   1    1.71    0.22 
   6  -3  -1    1.39    0.24 
   6  -3  -1    1.95    0.17 
  -6   3  -1    1.76    0.27 
   7   3  -1    4.34    0.22 
  -7   3   1    4.88    0.40 
  -7  -3  -1    4.11    0.35 
   7  -3   1    4.39    0.27 
   7  -3   1    4.16    0.38 
   7   3   1    4.00    0.36 
  -7   3  -1    3.53    0.35 
   7  -3  -1    4.00    0.39 
  -7  -3   1    3.85    0.35 
  -7   3  -1    4.05    0.39 
   7  -3  -1    4.41    0.28 
  -8   3   1   53.00    2.10 
   8  -3   1   51.15    2.06 
   8  -3   1   51.18    1.78 
  -8  -3  -1   50.40    2.00 
   8  -3  -1   50.45    2.11 
   8  -3  -1   51.31    1.80 
  -8  -3   1   52.97    2.07 
   8   3   1   50.54    2.00 
  -8   3  -1   51.94    2.04 
  -8   3  -1   47.37    2.10 
   9   3  -1   99.53    3.22 
   9  -3   1   99.65    3.31 
   9  -3   1  100.09    3.68 
  -9  -3  -1  102.84    3.63 
  -9   3   1  102.19    3.73 
  -9   3  -1  103.64    3.69 
  -9  -3   1   99.17    3.67 
   9   3   1  102.01    3.63 
   9  -3  -1  104.09    3.76 
   9  -3  -1   98.54    3.34 
 -10  -3  -1   11.81    0.78 
  10   3  -1   11.52    0.81 
  10  -3   1   12.07    0.82 
 -10   3   1   12.57    0.81 
  10  -3   1   12.42    0.59 
  10  -3  -1   12.12    0.61 
  10  -3  -1   12.54    0.84 
 -10  -3   1   12.86    0.81 
 -10   3  -1   12.46    0.81 
  10   3   1   12.39    0.78 
  11  -3   1   85.46    3.30 
  11  -3   1   84.34    2.86 
 -11   3   1   84.08    3.34 
  11   3  -1   83.41    3.30 
 -11  -3  -1   85.32    3.24 
 -11   3  -1   85.23    3.30 
 -11  -3   1   84.41    3.30 
  11   3   1   86.67    3.24 
  12   3  -1    3.13    0.53 
 -12   3   1    2.97    0.47 
  12  -3   1    2.49    0.54 
  12  -3   1    2.87    0.30 
 -12  -3  -1    2.55    0.46 
 -12  -3   1    2.98    0.43 
 -12   3  -1    3.33    0.49 
  12   3   1    2.22    0.41 
  12  -3  -1    2.99    0.47 
 -13  -3  -1    4.27    0.50 
  13  -3   1    5.12    0.39 
  13  -3   1    5.29    0.68 
  13   3  -1    4.15    0.64 
 -13   3   1    4.63    0.57 
 -13  -3   1    4.89    0.53 
  13   3   1    4.58    0.66 
 -13   3  -1    3.85    0.55 
  13  -3  -1    3.20    1.02 
  14   3  -1    5.52    0.79 
  14  -3   1    5.13    0.76 
 -14   3   1    2.96    0.58 
 -14  -3  -1    4.42    0.56 
  14  -3  -1    5.23    0.79 
  14   3   1    4.13    0.72 
 -14   3  -1    4.89    0.59 
 -14  -3   1    3.45    0.55 
 -15   3   1    0.86    0.46 
  15  -3   1    2.30    0.57 
 -15  -3  -1    1.38    0.41 
 -15  -3   1    1.28    0.37 
  15   3   1    1.66    1.05 
 -15   3  -1    1.38    0.47 
  16   3  -1   -0.12    0.75 
 -16  -3  -1    1.15    0.49 
 -16   3   1    1.16    0.56 
 -16   3  -1    2.01    0.47 
  16  -3  -1    1.68    0.83 
 -16  -3   1    1.52    0.48 
  16   3   1    1.59    0.73 
 -17  -3  -1    1.52    0.44 
  17  -3   1    0.83    0.87 
 -17   3   1    1.22    0.56 
  17   3  -1    1.26    0.93 
 -17  -3   1    1.90    0.53 
  17   3   1    2.53    0.87 
 -17   3  -1    1.20    0.52 
   0   4  -1  457.27   13.64 
   0  -4  -1  459.12   13.62 
   0   4  -1  428.34   13.70 
   0   4   1  474.10   13.65 
   0   4   1  424.68   13.68 
   0  -4   1  433.87   13.69 
  -1   4   1  148.95    4.69 
   1  -4   1  151.50    4.65 
   1   4  -1  148.37    4.67 
  -1   4   1  148.06    4.68 
   1  -4   1  147.27    4.68 
   1   4   1  144.76    4.65 
   1  -4  -1  144.09    4.68 
   1  -4  -1  148.46    4.65 
  -1   4  -1  151.13    4.67 
  -1   4  -1  142.04    4.68 
   1   4   1  151.97    4.57 
  -1  -4   1  148.06    4.66 
  -2   4   1    6.39    0.41 
   2  -4   1    6.83    0.38 
   2   4  -1    6.66    0.36 
  -2   4   1    7.13    0.38 
   2  -4   1    7.39    0.39 
   2  -4  -1    6.70    0.39 
  -2  -4   1    7.30    0.33 
   2  -4  -1    6.78    0.38 
  -2  -4   1    7.01    0.34 
  -2   4  -1    6.51    0.40 
  -2   4  -1    7.11    0.38 
   3  -4   1  171.91    5.53 
   3  -4   1  176.51    5.59 
  -3  -4  -1  187.40    5.51 
  -3   4   1  172.19    5.66 
  -3   4   1  178.66    5.53 
   3   4  -1  173.46    5.48 
   3  -4  -1  172.93    5.62 
  -3  -4   1  174.44    5.43 
  -3   4  -1  172.17    5.64 
  -3  -4   1  175.95    5.63 
  -3   4  -1  178.77    5.54 
   3  -4  -1  171.29    5.53 
  -4  -4  -1   70.49    2.27 
   4  -4   1   67.22    2.26 
   4   4  -1   65.76    2.19 
  -4   4   1   65.64    2.27 
  -4   4   1   67.42    2.32 
  -4   4   1   67.07    2.24 
  -4   4   1   65.09    2.43 
   4  -4   1   66.03    2.34 
  -4  -4   1   69.78    2.31 
   4  -4  -1   64.45    2.38 
   4  -4  -1   65.21    2.26 
  -4   4  -1   66.26    2.33 
  -4   4  -1   66.53    2.41 
  -4   4  -1   67.62    2.24 
  -5   4   1   12.46    0.56 
  -5  -4  -1   12.57    0.61 
   5   4  -1   12.76    0.52 
   5  -4   1   12.46    0.58 
  -5   4   1   11.94    0.57 
   5  -4   1   12.12    0.66 
  -5   4   1   11.74    0.63 
  -5   4   1   12.70    0.73 
  -5   4  -1   12.34    0.71 
   5  -4  -1   13.00    0.60 
  -5  -4   1   13.03    0.63 
   5  -4  -1   12.41    0.69 
  -5   4  -1   12.94    0.55 
  -5   4  -1   12.73    0.63 
  -6   4   1   14.12    0.59 
   6   4  -1   14.42    0.57 
  -6   4   1   13.18    0.80 
  -6   4   1   14.59    0.62 
   6  -4   1   14.92    0.66 
   6  -4   1   14.10    0.76 
  -6   4   1   14.38    0.76 
  -6  -4  -1   13.46    0.69 
   6  -4  -1   14.21    0.79 
  -6   4  -1   14.72    0.56 
  -6  -4   1   14.09    0.72 
  -6   4  -1   14.04    0.73 
  -6   4  -1   14.04    0.80 
   6  -4  -1   14.76    0.66 
  -6   4  -1   14.48    0.56 
   7  -4   1    1.04    0.16 
  -7   4   1    1.45    0.29 
   7   4  -1    0.87    0.13 
  -7   4   1    1.07    0.24 
   7  -4   1    0.88    0.26 
  -7  -4  -1    1.10    0.22 
  -7  -4   1    0.91    0.18 
   7  -4  -1    1.04    0.16 
   7  -4  -1    0.62    0.19 
  -7   4  -1    0.81    0.26 
  -7   4  -1    0.91    0.29 
   8  -4   1    2.30    0.32 
   8  -4   1    2.40    0.22 
  -8   4   1    2.66    0.35 
   8   4  -1    2.39    0.18 
  -8  -4  -1    1.98    0.29 
   8  -4  -1    2.61    0.24 
  -8   4  -1    2.18    0.33 
   8   4   1    2.07    0.32 
  -8   4  -1    1.53    0.34 
  -8  -4   1    2.50    0.30 
   8  -4  -1    1.57    0.33 
   9  -4   1    5.92    0.52 
   9   4  -1    6.13    0.33 
  -9   4   1    6.42    0.54 
   9  -4   1    6.71    0.40 
  -9  -4  -1    5.76    0.49 
   9   4   1    5.70    0.50 
   9  -4  -1    7.01    0.42 
   9  -4  -1    5.87    0.56 
  -9   4  -1    4.79    0.54 
  -9  -4   1    6.03    0.50 
  -9   4  -1    7.18    0.54 
 -10   4   1   69.80    2.79 
  10  -4   1   69.86    2.75 
  10   4  -1   67.12    2.73 
  10  -4   1   70.45    2.42 
 -10  -4  -1   68.83    2.68 
  10   4  -1   70.09    2.30 
 -10   4  -1   71.97    2.77 
  10  -4  -1   67.90    2.80 
  10  -4  -1   68.89    2.44 
 -10  -4   1   67.38    2.72 
  10   4   1   67.88    2.67 
  11   4  -1    1.56    0.21 
  11  -4   1    1.22    0.25 
  11   4  -1    0.87    0.34 
 -11  -4  -1    1.04    0.25 
 -11   4   1    1.08    0.34 
 -11  -4   1    0.85    0.31 
 -11   4  -1    1.52    0.32 
  11  -4  -1    1.29    0.34 
  11   4   1    0.73    0.31 
  12   4  -1    2.96    0.49 
  12  -4   1    2.48    0.46 
 -12   4   1    2.70    0.49 
  12  -4   1    2.08    0.32 
  12   4  -1    2.04    0.27 
 -12  -4  -1    2.94    0.41 
  12   4   1    2.34    0.52 
 -12   4  -1    3.29    0.48 
  12  -4  -1    2.75    0.57 
 -12  -4   1    2.76    0.54 
  13  -4   1    4.38    1.06 
 -13  -4  -1    5.70    0.54 
  13   4  -1    5.28    0.72 
 -13   4   1    4.87    0.58 
  13   4  -1    4.36    0.38 
 -13  -4   1    4.62    0.56 
 -13   4  -1    5.10    0.61 
  13  -4  -1    6.64    0.75 
  13   4   1    5.64    0.66 
  14   4  -1   28.51    1.57 
  14  -4   1   27.12    1.52 
 -14  -4  -1   29.62    1.53 
  14  -4   1   27.13    1.19 
 -14   4   1   28.27    1.61 
 -14   4  -1   27.50    1.55 
  14   4   1   27.90    1.49 
  14  -4  -1   26.08    1.57 
 -14  -4   1   27.68    1.54 
 -15   4   1   21.75    1.41 
  15  -4   1   19.52    1.37 
 -15  -4  -1   21.34    1.29 
  15   4  -1   22.61    1.42 
 -15  -4   1   21.82    1.33 
  15  -4  -1   21.47    1.42 
  15   4   1   22.61    1.60 
 -15   4  -1   20.79    1.32 
  16   4  -1    0.42    0.76 
 -16  -4  -1    0.27    0.39 
 -16   4   1    0.12    0.50 
  16  -4   1   -0.64    0.76 
 -16  -4   1    0.34    0.39 
  16   4   1    0.41    0.71 
 -16   4  -1   -0.14    0.48 
  16  -4  -1    0.45    0.82 
 -17  -4  -1    4.10    0.64 
  17  -4   1    7.42    1.61 
 -17   4   1    3.74    0.77 
  17   4  -1    5.02    0.95 
 -17   4  -1    5.17    0.74 
 -17  -4   1    3.58    0.65 
   0   5   1    0.13    0.06 
   0  -5  -1   -0.05    0.06 
   0   5  -1    0.04    0.07 
   0  -5   1    0.04    0.07 
   0   5  -1   -0.05    0.10 
   0   5   1    0.20    0.08 
   0  -5  -1    0.04    0.06 
  -1   5   1  108.09    3.58 
   1   5  -1  107.08    3.57 
   1  -5   1  107.09    3.58 
   1  -5   1  115.07    3.54 
  -1   5   1  112.72    3.59 
   1   5   1  109.39    3.56 
  -1  -5   1  107.48    3.55 
  -1   5  -1  115.08    3.58 
   1  -5  -1  107.03    3.58 
   1   5   1  114.40    3.46 
  -1   5  -1  105.96    3.59 
   1  -5  -1  110.97    3.53 
  -2   5   1   63.14    2.16 
   2   5  -1   63.06    2.13 
   2  -5   1   64.20    2.14 
   2  -5   1   61.87    2.15 
  -2   5   1   61.15    2.20 
   2   5   1   61.51    2.10 
   2  -5  -1   61.92    2.15 
  -2   5  -1   64.45    2.17 
   2  -5  -1   63.37    2.16 
  -2  -5   1   61.29    2.09 
  -3   5   1   31.05    1.19 
   3  -5   1   31.22    1.19 
  -3   5   1   30.23    1.28 
   3   5  -1   30.50    1.15 
   3  -5   1   30.76    1.21 
  -3  -5   1   31.41    1.11 
   3  -5  -1   30.29    1.23 
   3  -5  -1   31.51    1.20 
   3   5   1   31.04    1.13 
  -3   5  -1   31.96    1.20 
  -3  -5   1   31.84    1.15 
  -4  -5  -1   17.61    0.73 
  -4   5   1   18.04    0.76 
   4  -5   1   16.41    0.79 
  -4   5   1   17.10    0.88 
   4  -5   1   17.81    0.77 
   4   5  -1   17.62    0.72 
   4  -5  -1   17.54    0.77 
  -4   5  -1   16.87    0.86 
   4  -5  -1   16.89    0.83 
   4   5   1   16.85    0.71 
  -4  -5   1   17.25    0.75 
  -4   5  -1   17.52    0.76 
  -5   5   1   78.16    2.58 
  -5   5   1   77.31    2.62 
   5  -5   1   74.67    2.70 
   5  -5   1   77.07    2.60 
  -5   5   1   74.60    2.71 
   5   5  -1   78.00    2.52 
   5  -5  -1   73.45    2.74 
  -5   5  -1   79.70    2.58 
  -5   5  -1   77.96    2.65 
  -5  -5   1   70.81    2.75 
   5  -5  -1   75.27    2.60 
  -6   5   1   12.73    0.78 
  -6   5   1   12.74    0.61 
   6  -5   1   13.24    0.64 
  -6   5   1   12.98    0.59 
   6   5  -1   12.89    0.56 
  -6  -5  -1   13.24    0.66 
   6  -5   1   12.97    0.71 
  -6   5   1   12.63    0.70 
  -6   5  -1   12.12    0.56 
  -6   5  -1   13.04    0.58 
   6  -5  -1   12.32    0.73 
  -6  -5   1   12.44    0.66 
   6  -5  -1   12.84    0.64 
  -6   5  -1   12.29    0.77 
  -7   5   1    7.95    0.55 
   7  -5   1    7.81    0.45 
   7   5  -1    7.78    0.39 
  -7   5   1    7.61    0.40 
  -7  -5  -1    7.40    0.47 
  -7   5   1    6.71    0.56 
   7  -5   1    7.31    0.53 
  -7   5   1    7.78    0.39 
  -7  -5   1    7.02    0.48 
  -7   5  -1    7.86    0.59 
   7  -5  -1    7.17    0.53 
   7   5   1    7.79    0.34 
   7  -5  -1    7.80    0.45 
  -7   5  -1    7.64    0.36 
  -7   5  -1    7.11    0.51 
  -7   5  -1    7.81    0.36 
   8  -5   1    6.79    0.42 
  -8   5   1    5.48    0.54 
  -8   5   1    6.03    0.52 
   8   5  -1    6.17    0.34 
  -8  -5  -1    6.00    0.46 
   8  -5   1    6.38    0.51 
  -8   5  -1    5.43    0.55 
   8  -5  -1    6.27    0.41 
  -8  -5   1    5.84    0.47 
   8   5   1    6.01    0.28 
  -8   5  -1    5.85    0.49 
   8  -5  -1    6.70    0.52 
   9   5  -1   18.98    0.78 
   9  -5   1   19.33    0.87 
  -9  -5  -1   18.53    0.98 
  -9   5   1   20.66    1.08 
   9  -5   1   19.24    1.04 
  -9  -5   1   18.70    1.02 
  -9   5  -1   18.44    1.11 
   9   5   1   18.50    0.99 
  -9   5  -1   19.61    1.05 
   9  -5  -1   20.16    0.91 
   9  -5  -1   20.99    1.11 
  10   5  -1    0.47    0.14 
  10  -5   1    0.20    0.27 
 -10  -5  -1    0.22    0.22 
  10  -5   1    0.51    0.16 
 -10   5   1    1.06    0.36 
  10   5   1    0.65    0.30 
  10  -5  -1    0.66    0.30 
 -10   5  -1    0.60    0.30 
 -10   5  -1    0.74    0.30 
  10  -5  -1    0.13    0.18 
 -10  -5   1    0.73    0.23 
 -11   5   1    9.30    0.72 
 -11  -5  -1    8.48    0.65 
  11   5  -1    9.50    0.47 
  11  -5   1    8.70    0.54 
  11   5  -1    8.94    0.71 
  11  -5   1    9.03    0.71 
  11   5   1    9.50    0.71 
  11  -5  -1    7.89    0.69 
 -11  -5   1    9.27    0.69 
 -11   5  -1    8.99    0.70 
  12  -5   1   14.13    0.73 
 -12  -5  -1   12.95    0.86 
  12   5  -1   13.60    0.65 
  12  -5   1   14.00    0.94 
  12   5  -1   13.40    0.92 
 -12   5   1   13.90    0.98 
  12   5   1   13.19    0.90 
 -12  -5   1   14.27    0.93 
  12  -5  -1   13.75    1.00 
 -12   5  -1   13.32    0.92 
  13  -5   1    6.96    0.50 
  13   5  -1    5.31    0.71 
  13   5  -1    6.31    0.43 
 -13   5   1    4.67    0.59 
  13  -5   1    6.45    0.74 
 -13  -5  -1    5.17    0.52 
  13  -5  -1    4.90    0.78 
 -13  -5   1    5.29    0.57 
  13   5   1    6.93    0.71 
 -13   5  -1    5.77    0.65 
  14   5  -1   -0.37    0.28 
  14  -5   1   -0.02    0.30 
  14   5  -1   -0.29    0.54 
 -14  -5  -1    0.41    0.34 
 -14   5   1    0.20    0.41 
  14  -5   1    0.23    0.58 
 -14   5  -1   -0.09    0.43 
 -14  -5   1    0.21    0.36 
  14   5   1   -0.31    0.87 
  14  -5  -1    0.06    0.54 
 -15   5   1    3.68    0.71 
 -15  -5  -1    3.72    0.54 
  15   5  -1    3.26    0.46 
  15  -5   1    5.29    0.96 
  15   5  -1    5.29    0.93 
 -15   5  -1    3.46    0.68 
  15  -5  -1    5.43    0.97 
  15   5   1    3.24    0.67 
 -15  -5   1    4.11    0.54 
 -16  -5  -1    2.05    0.49 
 -16   5   1    2.03    0.56 
  16   5   1    2.87    0.74 
  16  -5  -1    2.12    0.78 
 -16  -5   1    1.93    0.50 
 -16   5  -1    2.14    0.51 
 -17  -5  -1    1.54    0.47 
  17   5  -1    1.25    0.93 
 -17   5   1    1.31    0.58 
 -17   5  -1    1.34    0.61 
  17   5   1    1.46    0.93 
   0   6  -1   15.05    0.66 
   0   6   1   15.56    0.66 
   0  -6  -1   15.05    0.70 
   0   6   1   15.69    0.71 
   0  -6  -1   16.05    0.63 
   0  -6   1   15.53    0.71 
   0   6  -1   14.83    0.71 
   1   6  -1    4.77    0.33 
  -1   6   1    4.84    0.32 
  -1   6   1    4.80    0.33 
   1  -6   1    4.75    0.33 
   1  -6   1    5.36    0.31 
   1   6  -1    4.75    0.28 
  -1   6  -1    4.93    0.33 
  -1  -6   1    4.51    0.32 
  -1   6  -1    4.92    0.34 
   1   6   1    4.91    0.28 
   1  -6  -1    5.31    0.31 
   1  -6  -1    4.65    0.33 
   1   6   1    4.70    0.32 
  -2   6   1   20.03    0.86 
   2  -6   1   19.85    0.86 
   2   6  -1   19.05    0.83 
   2  -6   1   20.31    0.83 
  -2   6   1   19.16    0.89 
   2   6   1   19.96    0.72 
  -2   6  -1   19.79    0.88 
   2  -6  -1   19.33    0.85 
   2  -6  -1   18.74    0.83 
   2   6   1   19.26    0.82 
  -2  -6   1   20.06    0.81 
  -2   6  -1   19.04    0.86 
  -3   6   1   19.45    0.85 
   3   6  -1   18.32    0.79 
  -3   6   1   18.14    0.90 
   3  -6   1   18.94    0.83 
   3  -6   1   18.55    0.84 
  -3  -6   1   18.76    0.76 
   3   6   1   17.90    0.77 
   3  -6  -1   18.25    0.84 
  -3   6  -1   19.22    0.85 
   3  -6  -1   18.57    0.84 
   4  -6   1   15.66    0.77 
  -4   6   1   16.39    0.75 
   4  -6   1   17.05    0.78 
  -4   6   1   15.81    0.86 
   4   6  -1   16.08    0.71 
   4  -6  -1   17.12    0.78 
  -4  -6   1   14.73    0.77 
   4   6   1   16.74    0.69 
  -4   6  -1   15.35    0.84 
   4  -6  -1   16.44    0.82 
  -4   6  -1   17.11    0.77 
  -5   6   1   56.70    2.11 
  -5   6   1   54.46    2.23 
   5   6  -1   56.93    1.98 
   5  -6   1   58.70    2.07 
  -5   6   1   58.68    2.05 
  -5  -6  -1   57.31    2.02 
   5  -6   1   57.18    2.13 
  -5   6  -1   57.80    2.04 
   5  -6  -1   57.15    2.06 
  -5   6  -1   57.39    2.24 
   5  -6  -1   55.50    2.15 
   5   6   1   55.58    1.93 
  -5  -6   1   56.71    2.05 
  -5   6  -1   56.40    2.06 
  -6   6   1    0.82    0.19 
   6   6  -1    0.91    0.15 
  -6   6   1    0.94    0.20 
  -6   6   1    0.84    0.21 
   6  -6   1    0.82    0.18 
   6  -6   1    0.79    0.17 
  -6  -6  -1    1.19    0.17 
  -6   6   1    0.90    0.17 
   6  -6  -1    1.16    0.24 
  -6   6  -1    0.92    0.24 
  -6   6  -1    0.90    0.21 
  -6  -6   1    0.73    0.15 
   6   6   1    0.79    0.14 
   6  -6  -1    1.00    0.18 
  -6   6  -1    0.84    0.16 
   7   6  -1   11.79    0.56 
  -7   6   1   11.45    0.78 
  -7   6   1   11.76    0.70 
  -7   6   1   12.57    0.60 
   7  -6   1   12.08    0.63 
  -7  -6  -1   11.19    0.63 
   7  -6   1   10.98    0.70 
  -7   6   1   11.58    0.57 
   7   6   1   11.87    0.51 
  -7   6  -1   12.18    0.56 
  -7  -6   1   11.36    0.65 
   7  -6  -1   12.17    0.64 
  -7   6  -1   10.82    0.67 
  -7   6  -1   12.59    0.56 
   7  -6  -1   11.30    0.72 
  -7   6  -1   11.17    0.76 
  -8   6   1    0.16    0.27 
   8   6  -1    0.94    0.17 
  -8  -6  -1    0.71    0.19 
   8  -6   1    0.85    0.18 
  -8   6   1    0.67    0.28 
  -8   6   1    0.77    0.13 
   8  -6   1    0.69    0.23 
  -8  -6   1    0.49    0.18 
   8  -6  -1    1.06    0.19 
  -8   6  -1    0.62    0.27 
   8  -6  -1    0.73    0.23 
  -8   6  -1    0.64    0.29 
   9  -6   1    6.06    0.54 
  -9  -6  -1    6.12    0.49 
   9   6  -1    6.53    0.38 
  -9   6   1    6.45    0.54 
   9  -6   1    7.04    0.47 
  -9  -6   1    5.98    0.50 
   9   6   1    7.05    0.35 
  -9   6  -1    5.99    0.61 
  -9   6  -1    6.43    0.56 
   9  -6  -1    7.07    0.59 
   9  -6  -1    6.68    0.46 
 -10   6   1   15.25    0.96 
  10   6  -1   15.23    0.70 
  10  -6   1   16.47    0.82 
 -10  -6  -1   16.12    0.90 
  10   6   1   16.29    0.65 
 -10   6  -1   14.24    1.02 
 -10  -6   1   16.01    0.93 
  10   6   1   16.76    0.92 
 -10   6  -1   16.13    0.97 
  10  -6  -1   16.19    1.17 
  10  -6  -1   16.61    0.83 
  11  -6   1    1.66    0.31 
  11  -6   1    0.89    0.35 
 -11   6   1    1.78    0.41 
 -11  -6  -1    1.06    0.28 
  11   6  -1    1.33    0.25 
 -11   6  -1    1.56    0.36 
  11  -6  -1    2.56    0.52 
 -11  -6   1    1.72    0.39 
  11   6   1    1.73    0.35 
  11  -6  -1    1.62    0.33 
  11   6   1    1.43    0.18 
  12  -6   1   44.88    1.76 
  12  -6   1   47.52    2.32 
 -12  -6  -1   43.62    1.95 
  12   6  -1   45.74    2.03 
  12   6  -1   43.74    1.63 
 -12   6   1   45.94    2.14 
  12  -6  -1   41.17    2.31 
 -12  -6   1   43.18    1.99 
  12   6   1   42.52    1.93 
 -12   6  -1   44.76    2.08 
  12   6   1   42.80    1.54 
  13  -6   1    9.80    0.63 
 -13   6   1    9.16    0.79 
  13   6  -1    8.61    0.81 
  13   6  -1    8.77    0.53 
  13  -6   1    9.26    0.84 
 -13  -6  -1    8.44    0.66 
 -13   6  -1    8.80    0.75 
  13  -6  -1    8.37    0.86 
  13   6   1   10.41    0.79 
 -13  -6   1    8.19    0.70 
  14   6  -1   47.88    1.82 
 -14  -6  -1   48.22    2.21 
  14   6  -1   47.42    2.24 
  14  -6   1   48.25    2.24 
 -14   6   1   49.42    2.38 
  14  -6   1   48.03    1.96 
 -14   6  -1   49.87    2.33 
 -14  -6   1   48.39    2.26 
  14   6   1   49.66    2.20 
  14  -6  -1   47.40    2.28 
 -15   6   1    7.46    0.79 
  15   6  -1    7.69    1.02 
  15   6  -1    6.34    0.57 
 -15  -6  -1    7.53    0.69 
 -15  -6   1    7.99    0.73 
  15   6   1    9.41    0.96 
 -15   6  -1    7.28    0.79 
 -16  -6  -1    0.46    0.37 
  16   6  -1    0.04    0.84 
 -16   6   1    1.14    0.59 
  16   6  -1    0.95    0.43 
  16  -6  -1   -0.30    0.94 
  16   6   1    0.12    0.75 
 -16   6  -1    1.29    0.59 
 -16  -6   1    0.49    0.39 
 -17   6   1    8.63    1.04 
  17   6  -1   11.96    1.43 
  17   6   1    7.08    1.34 
 -17  -6   1    8.47    0.76 
 -17   6  -1   10.37    0.89 
   0   7  -1    0.02    0.09 
   0   7   1   -0.06    0.09 
   0  -7  -1    0.02    0.07 
   0   7   1   -0.10    0.10 
   0  -7  -1    0.08    0.09 
   0   7  -1   -0.10    0.09 
   0  -7   1    0.04    0.09 
   1  -7   1  402.32   12.19 
  -1   7   1  383.61   12.29 
   1   7  -1  392.34   12.15 
   1  -7   1  387.33   12.28 
   1   7  -1  387.14   12.29 
  -1   7   1  397.17   12.27 
  -1   7  -1  406.65   12.26 
  -1  -7   1  393.25   12.25 
   1   7   1  403.70   12.14 
   1  -7  -1  404.43   12.19 
   1   7   1  391.87   12.27 
   1  -7  -1  386.48   12.28 
  -1   7  -1  396.79   12.32 
  -2   7   1   19.56    0.88 
   2   7  -1   18.31    0.85 
   2  -7   1   19.39    0.82 
   2  -7   1   18.64    0.87 
  -2   7   1   18.05    0.87 
   2  -7  -1   18.51    0.82 
   2  -7  -1   19.18    0.87 
   2   7   1   19.60    0.73 
  -2  -7   1   18.49    0.81 
  -2   7  -1   18.91    0.88 
  -2   7  -1   19.05    0.89 
   2   7   1   18.80    0.83 
   3  -7   1  108.46    3.67 
  -3   7   1  107.77    3.76 
  -3   7   1  109.97    3.67 
   3   7  -1  110.28    3.63 
   3  -7   1  109.19    3.67 
   3  -7  -1  108.79    3.67 
   3  -7  -1  106.68    3.65 
   3   7   1  110.34    3.60 
  -3  -7   1  107.58    3.56 
  -3   7  -1  107.83    3.74 
  -3   7  -1  110.12    3.68 
   4  -7   1   35.77    1.40 
   4   7  -1   34.46    1.34 
  -4   7   1   34.74    1.51 
   4  -7   1   33.67    1.38 
  -4   7   1   34.23    1.38 
  -4   7  -1   35.37    1.39 
  -4   7  -1   33.91    1.49 
   4  -7  -1   34.68    1.39 
   4  -7  -1   33.32    1.41 
   4   7   1   35.08    1.31 
   5  -7   1    9.18    0.55 
   5  -7   1    9.44    0.55 
   5   7  -1    9.40    0.50 
  -5   7   1    8.26    0.61 
  -5   7   1    8.53    0.52 
   5  -7  -1    9.48    0.55 
   5   7   1    9.53    0.47 
  -5  -7   1    8.97    0.50 
   5  -7  -1    8.29    0.56 
  -5   7  -1    8.95    0.62 
  -5   7  -1    9.42    0.53 
   6   7  -1    1.66    0.20 
   6  -7   1    1.38    0.26 
  -6   7   1    1.33    0.29 
  -6   7   1    1.90    0.29 
   6  -7   1    1.57    0.22 
  -6   7   1    1.34    0.21 
  -6   7  -1    1.83    0.22 
   6  -7  -1    1.66    0.28 
  -6  -7   1    1.77    0.21 
   6   7   1    2.16    0.19 
  -6   7  -1    2.17    0.28 
  -6   7  -1    1.47    0.31 
   6  -7  -1    1.71    0.24 
  -7   7   1   -0.01    0.19 
   7  -7   1    0.42    0.14 
  -7   7   1    0.18    0.22 
  -7   7   1    0.21    0.14 
   7   7  -1    0.20    0.13 
   7  -7   1    0.44    0.19 
  -7   7   1    0.21    0.24 
  -7  -7  -1    0.07    0.13 
   7  -7  -1    0.57    0.15 
  -7   7  -1    0.37    0.15 
  -7  -7   1    0.40    0.17 
  -7   7  -1    0.07    0.22 
   7   7   1    0.56    0.12 
   7  -7  -1    0.36    0.20 
  -7   7  -1    0.51    0.24 
   8   7  -1    5.52    0.37 
   8  -7   1    5.76    0.44 
  -8  -7  -1    5.37    0.41 
  -8   7   1    5.90    0.38 
  -8   7   1    6.00    0.40 
  -8   7   1    5.89    0.58 
   8  -7   1    6.13    0.50 
  -8   7   1    5.07    0.47 
  -8  -7   1    5.41    0.43 
  -8   7  -1    5.22    0.48 
   8  -7  -1    5.96    0.51 
   8  -7  -1    5.91    0.43 
   8   7   1    5.29    0.34 
  -8   7  -1    5.84    0.36 
  -8   7  -1    6.04    0.38 
  -8   7  -1    5.40    0.56 
  -9  -7  -1   39.25    1.64 
  -9   7   1   38.79    1.40 
  -9   7   1   37.16    1.74 
  -9   7   1   40.56    1.40 
   9  -7   1   38.78    1.56 
  -9   7   1   36.54    1.84 
   9  -7   1   38.99    1.73 
   9   7  -1   37.66    1.44 
  -9  -7   1   37.45    1.68 
  -9   7  -1   37.73    1.71 
   9  -7  -1   37.68    1.57 
   9  -7  -1   37.98    1.75 
  -9   7  -1   37.36    1.86 
   9   7   1   37.77    1.39 
  10  -7   1   10.33    0.62 
 -10   7   1    8.76    0.72 
  10  -7   1   10.83    0.76 
 -10  -7  -1    9.97    0.68 
  10   7  -1    9.64    0.55 
  10   7   1    9.62    0.50 
 -10   7  -1   10.12    0.76 
  10  -7  -1   10.19    0.63 
 -10   7  -1    9.52    0.80 
 -10  -7   1   10.16    0.68 
  10  -7  -1   10.00    0.78 
 -11   7   1   13.73    0.96 
 -11  -7  -1   14.49    0.88 
  11  -7   1   13.67    0.77 
  11  -7   1   14.18    0.92 
  11   7  -1   13.92    0.68 
 -11   7  -1   13.07    0.92 
  11  -7  -1   14.88    0.98 
 -11   7  -1   13.27    0.96 
  11  -7  -1   13.49    0.77 
 -11  -7   1   12.97    0.84 
  11   7   1   12.83    0.62 
  11   7   1   14.14    0.86 
  12  -7   1   11.35    0.87 
 -12   7   1    9.83    0.81 
  12   7  -1   10.50    0.59 
 -12  -7  -1   12.37    0.78 
  12  -7   1   10.80    0.68 
  12   7   1    9.95    0.53 
  12  -7  -1   10.37    0.85 
 -12   7  -1   10.93    0.82 
  12   7   1   10.39    0.77 
 -12  -7   1    9.23    0.74 
  13   7  -1   10.95    0.90 
 -13   7   1    9.30    0.81 
  13   7  -1    9.79    0.60 
  13  -7   1   10.75    0.70 
  13  -7   1   11.87    0.91 
 -13  -7  -1   10.10    0.74 
  13  -7  -1   11.14    0.91 
  13   7   1    9.69    0.54 
 -13  -7   1   10.75    0.77 
  13   7   1    8.89    0.81 
 -13   7  -1   10.41    0.83 
  14   7  -1    2.46    0.62 
  14   7  -1    3.81    0.47 
 -14   7   1    2.40    0.49 
 -14  -7  -1    2.77    0.46 
  14  -7   1    3.77    0.53 
  14   7   1    2.90    0.37 
  14  -7  -1    2.42    0.69 
 -14  -7   1    1.76    0.36 
 -14   7  -1    3.92    0.65 
  15   7  -1    0.82    0.40 
  15   7  -1    0.37    0.71 
 -15  -7  -1    0.43    0.35 
 -15   7   1    0.26    0.52 
  15  -7  -1    0.26    0.82 
 -15  -7   1    1.09    0.36 
  15   7   1    0.43    0.65 
 -15   7  -1    0.49    0.49 
  16   7  -1    0.12    0.46 
 -16   7   1    1.06    0.56 
  16   7  -1    0.50    0.88 
 -16  -7  -1    0.86    0.41 
 -16   7  -1    0.73    0.52 
  16   7   1    0.18    0.76 
 -16  -7   1    0.22    0.42 
   0  -8  -1  411.77   13.04 
   0   8  -1  423.99   12.96 
   0   8   1  410.81   13.05 
   0  -8  -1  432.82   12.89 
   0  -8   1  414.61   13.04 
   0   8  -1  409.63   13.07 
   0   8   1  426.09   12.97 
   1  -8   1    0.36    0.10 
   1  -8   1    0.26    0.11 
  -1   8   1    0.34    0.11 
   1   8  -1    0.30    0.13 
   1   8  -1    0.13    0.11 
   1   8   1    0.29    0.11 
   1  -8  -1    0.27    0.11 
  -1  -8   1    0.24    0.11 
  -1   8  -1    0.22    0.12 
  -1   8  -1    0.35    0.11 
   1   8   1    0.23    0.11 
   2   8  -1    4.77    0.31 
  -2   8   1    3.91    0.37 
  -2   8   1    4.16    0.35 
   2  -8   1    4.77    0.32 
   2  -8   1    4.55    0.36 
   2   8  -1    4.55    0.36 
   2   8   1    4.74    0.29 
   2   8   1    4.35    0.34 
  -2  -8   1    4.93    0.34 
   2  -8  -1    4.39    0.33 
  -2   8  -1    4.54    0.38 
  -2   8  -1    4.25    0.35 
   2  -8  -1    5.09    0.37 
  -3   8   1   24.88    1.14 
   3   8  -1   24.33    1.05 
   3  -8   1   23.94    1.03 
  -3   8   1   23.17    1.07 
   3  -8   1   24.62    1.09 
   3  -8  -1   23.82    1.08 
   3   8   1   24.57    0.91 
   3   8   1   24.67    1.04 
  -3   8  -1   24.85    1.14 
   3  -8  -1   22.99    1.03 
  -3  -8   1   24.70    1.01 
  -3   8  -1   23.66    1.08 
   4  -8   1   19.73    0.94 
   4  -8   1   19.36    0.91 
  -4   8   1   19.75    0.93 
   4   8  -1   18.88    0.88 
  -4   8   1   18.94    1.01 
   4   8   1   19.68    0.87 
   4  -8  -1   19.54    0.93 
  -4   8  -1   19.58    0.93 
  -4   8  -1   19.34    1.01 
   4  -8  -1   18.58    0.92 
  -5   8   1    3.20    0.38 
   5  -8   1    4.12    0.35 
   5  -8   1    3.25    0.33 
  -5   8   1    3.99    0.33 
   5   8  -1    3.30    0.29 
  -5   8  -1    3.71    0.39 
  -5   8  -1    3.16    0.32 
   5  -8  -1    4.03    0.36 
   5   8   1    3.77    0.30 
   6   8  -1    0.04    0.14 
  -6   8   1   -0.02    0.22 
  -6   8   1    0.30    0.21 
   6  -8   1    0.27    0.14 
  -6   8   1    0.10    0.15 
  -6   8  -1   -0.01    0.23 
  -6  -8   1    0.31    0.15 
   6  -8  -1    0.08    0.20 
  -6   8  -1    0.22    0.23 
   6  -8  -1    0.27    0.15 
   6   8   1    0.06    0.13 
  -6   8  -1    0.01    0.16 
   7  -8   1   30.58    1.33 
  -7   8   1   30.38    1.54 
  -7   8   1   29.75    1.30 
  -7   8   1   30.02    1.39 
   7   8  -1   30.90    1.25 
   7  -8   1   30.57    1.38 
  -7   8   1   30.39    1.28 
   7  -8  -1   31.10    1.42 
  -7  -8   1   31.35    1.32 
   7  -8  -1   29.81    1.33 
  -7   8  -1   31.49    1.28 
   7   8   1   30.80    1.21 
  -7   8  -1   30.43    1.54 
  -7   8  -1   30.97    1.37 
   8  -8   1    4.65    0.46 
   8   8  -1    3.66    0.34 
  -8   8   1    4.74    0.46 
  -8   8   1    4.40    0.35 
  -8   8   1    4.63    0.40 
   8  -8   1    5.52    0.42 
  -8  -8  -1    4.41    0.37 
  -8   8   1    4.29    0.53 
   8  -8  -1    3.96    0.43 
  -8   8  -1    3.48    0.35 
  -8  -8   1    4.74    0.39 
  -8   8  -1    4.13    0.44 
   8   8   1    4.74    0.32 
  -8   8  -1    5.04    0.35 
   8  -8  -1    5.12    0.41 
  -8   8  -1    4.15    0.51 
   9   8  -1   12.23    0.63 
  -9   8   1   12.01    0.81 
  -9   8   1   12.07    0.62 
   9  -8   1   12.33    0.71 
  -9  -8  -1   11.51    0.70 
  -9   8   1   12.02    0.60 
  -9   8   1   10.76    0.85 
  -9   8  -1   12.76    0.58 
  -9   8  -1   11.55    0.57 
   9   8   1   11.85    0.59 
   9  -8  -1   11.93    0.70 
   9  -8  -1   11.83    0.92 
  -9   8  -1   11.04    0.88 
  -9  -8   1   12.34    0.75 
  -9   8  -1   11.76    0.79 
  10  -8   1   44.67    1.81 
  10  -8   1   45.65    1.97 
  10   8  -1   44.42    1.68 
 -10  -8  -1   43.32    1.85 
 -10   8   1   42.31    2.01 
 -10   8  -1   45.61    2.01 
  10   8   1   44.24    1.63 
 -10   8  -1   42.70    2.13 
  10  -8  -1   42.93    1.80 
 -10  -8   1   42.65    1.87 
  10  -8  -1   43.52    1.98 
  11  -8   1   13.37    0.77 
  11  -8   1   13.86    1.10 
 -11   8   1   12.85    0.94 
 -11  -8  -1   12.72    0.81 
  11   8  -1   13.25    0.69 
  11  -8  -1   12.34    1.26 
 -11   8  -1   13.31    0.92 
  11   8   1   13.07    0.85 
 -11  -8   1   12.99    0.82 
  11  -8  -1   12.46    0.78 
  11   8   1   12.91    0.63 
 -11   8  -1   11.72    0.98 
  12   8  -1    5.82    0.46 
  12  -8   1    6.89    0.58 
  12  -8   1    7.25    0.72 
 -12  -8  -1    6.01    0.54 
 -12   8   1    5.83    0.65 
  12   8   1    5.66    0.43 
 -12   8  -1    5.22    0.65 
  12   8   1    5.01    0.64 
 -12  -8   1    6.63    0.56 
  12  -8  -1    5.91    0.73 
  13  -8   1    0.88    0.34 
 -13   8   1    0.04    0.45 
  13   8  -1    0.73    0.31 
 -13  -8  -1    0.41    0.30 
  13  -8   1    0.74    0.56 
  13   8  -1    1.28    0.61 
  13  -8  -1   -0.42    0.58 
 -13  -8   1    0.01    0.30 
 -13   8  -1    1.05    0.47 
  13   8   1    0.56    0.48 
  14  -8   1   21.38    1.12 
  14  -8   1   22.42    1.33 
  14   8  -1   22.10    1.04 
 -14  -8  -1   19.42    1.17 
  14   8  -1   19.31    1.32 
 -14   8   1   20.02    1.33 
 -14   8  -1   20.45    1.30 
  14   8   1   21.01    1.31 
  14   8   1   19.79    0.92 
  14  -8  -1   21.07    1.41 
 -14  -8   1   20.51    1.24 
 -15  -8  -1    1.12    0.34 
  15   8  -1    0.85    0.75 
 -15   8   1    0.27    0.51 
 -15   8  -1    1.19    0.55 
  15   8   1    1.16    0.70 
  15   8   1    1.81    0.37 
 -15  -8   1    1.03    0.35 
  15  -8  -1    1.40    0.85 
 -16  -8  -1    1.86    0.43 
  16   8  -1    0.89    0.90 
  16   8  -1    0.23    0.51 
 -16   8   1    1.85    0.58 
 -16   8  -1    1.29    0.54 
  16   8   1    2.48    0.82 
 -16  -8   1    1.24    0.41 
   0   9  -1   -0.03    0.12 
   0  -9  -1    0.13    0.12 
   0   9   1    0.10    0.13 
   0   9  -1    0.15    0.13 
   0  -9   1   -0.01    0.12 
   0  -9  -1    0.11    0.09 
   0   9   1    0.03    0.13 
  -1   9   1    2.25    0.27 
  -1   9   1    2.24    0.25 
   1   9  -1    2.90    0.26 
   1   9  -1    1.87    0.23 
   1  -9   1    2.54    0.25 
   1   9   1    2.31    0.25 
   1  -9  -1    1.97    0.24 
  -1  -9   1    2.37    0.24 
  -1   9  -1    2.22    0.25 
  -1   9  -1    1.91    0.24 
   1   9   1    2.63    0.23 
   1  -9  -1    2.93    0.24 
  -2   9   1   18.09    0.94 
   2   9  -1   18.81    0.92 
  -2   9   1   19.75    0.97 
   2  -9   1   18.44    0.92 
   2   9  -1   19.64    0.81 
   2  -9   1   19.35    0.86 
  -2   9  -1   19.40    0.93 
  -2  -9   1   19.10    0.88 
  -2   9  -1   18.74    0.94 
   2  -9  -1   20.36    0.87 
   2   9   1   19.47    0.80 
   2   9   1   19.06    0.91 
   2  -9  -1   18.47    0.93 
  -3   9   1   62.03    2.29 
  -3   9   1   59.54    2.38 
   3  -9   1   58.77    2.27 
   3   9  -1   59.71    2.25 
   3  -9   1   61.61    2.21 
   3  -9  -1   62.08    2.30 
   3   9   1   62.03    2.06 
   3   9   1   61.31    2.23 
  -3  -9   1   60.17    2.18 
   3  -9  -1   61.32    2.22 
  -3   9  -1   60.25    2.35 
  -3   9  -1   61.93    2.31 
   4  -9   1   20.13    0.98 
  -4   9   1   19.41    0.97 
  -4   9   1   20.42    1.06 
   4  -9   1   20.70    0.95 
   4   9  -1   19.73    0.94 
   4  -9  -1   21.16    0.99 
   4  -9  -1   19.86    0.95 
   4   9   1   20.24    0.93 
  -4   9  -1   18.82    1.04 
  -4   9  -1   20.88    0.99 
   5   9  -1   40.84    1.63 
  -5   9   1   39.93    1.81 
   5  -9   1   41.01    1.65 
   5  -9   1   40.88    1.68 
  -5   9   1   42.10    1.67 
  -5   9  -1   40.47    1.81 
   5  -9  -1   40.10    1.67 
  -5   9  -1   40.53    1.66 
   5   9   1   41.22    1.58 
   5  -9  -1   39.70    1.66 
  -6   9   1   15.25    0.79 
   6   9  -1   14.78    0.74 
   6  -9   1   14.86    0.81 
   6  -9   1   13.80    0.79 
  -6   9   1   13.97    0.91 
   6   9   1   14.73    0.72 
   6  -9  -1   14.96    0.81 
  -6   9  -1   14.79    0.92 
  -6   9  -1   14.29    0.77 
   6  -9  -1   15.34    0.84 
  -7   9   1    0.31    0.18 
   7   9  -1    0.44    0.18 
   7  -9   1    0.68    0.23 
  -7   9   1    0.53    0.31 
   7  -9   1    0.54    0.17 
   7  -9  -1    0.81    0.25 
   7   9   1    0.67    0.17 
  -7   9  -1    0.62    0.29 
   7  -9  -1    0.93    0.21 
  -7   9  -1    0.20    0.32 
  -7   9  -1    0.52    0.20 
   8  -9   1    0.36    0.27 
  -8   9   1   -0.01    0.32 
  -8   9   1    0.33    0.20 
  -8   9   1    0.15    0.25 
   8   9  -1    0.15    0.21 
   8  -9   1    0.34    0.20 
  -8   9   1    0.39    0.29 
  -8  -9   1    0.19    0.17 
   8  -9  -1    0.56    0.21 
  -8   9  -1    0.65    0.30 
   8   9   1    0.34    0.18 
   8  -9  -1    0.10    0.27 
  -8   9  -1   -0.02    0.32 
  -8   9  -1    0.08    0.21 
   9   9  -1   46.74    1.78 
   9  -9   1   45.98    1.89 
  -9   9   1   46.46    1.76 
  -9   9   1   47.34    2.05 
   9  -9   1   46.08    1.98 
  -9   9   1   42.02    2.14 
  -9   9   1   47.97    1.79 
  -9  -9   1   45.17    1.89 
   9  -9  -1   45.41    2.04 
   9   9   1   45.80    1.72 
  -9   9  -1   43.59    2.14 
  -9   9  -1   46.13    2.01 
  -9   9  -1   47.24    1.75 
   9  -9  -1   44.67    1.89 
  -9   9  -1   46.39    1.73 
  10  -9   1   -0.16    0.33 
 -10   9   1   -0.18    0.25 
  10   9  -1   -0.09    0.23 
 -10  -9  -1    0.19    0.22 
 -10   9   1    0.31    0.69 
 -10   9   1    0.19    0.36 
 -10   9   1   -0.16    0.22 
  10  -9   1    0.04    0.24 
  10   9   1   -0.06    0.21 
 -10   9  -1   -0.28    0.21 
  10  -9  -1    0.04    0.24 
 -10   9  -1   -0.35    0.48 
 -10   9  -1    0.25    0.21 
 -10  -9   1   -0.07    0.20 
 -10   9  -1   -0.25    0.40 
  11  -9   1    7.27    0.73 
  11  -9   1    8.77    0.64 
 -11  -9  -1    7.87    0.60 
  11   9  -1    7.55    0.54 
 -11   9   1    7.69    0.73 
  11   9   1    7.64    0.50 
 -11   9  -1    7.68    0.70 
 -11   9  -1    7.49    0.83 
  11  -9  -1    7.23    0.61 
 -11  -9   1    8.43    0.63 
  12   9  -1    5.47    0.48 
  12  -9   1    6.04    0.58 
  12  -9   1    4.80    0.71 
 -12   9   1    6.10    0.65 
 -12  -9  -1    5.60    0.50 
  12  -9  -1    6.36    0.79 
 -12   9  -1    5.75    0.64 
 -12   9  -1    5.91    0.82 
 -12  -9   1    5.58    0.50 
  12   9   1    5.63    0.46 
  12   9   1    6.54    0.68 
 -13  -9  -1   -0.10    0.29 
 -13   9   1    0.58    0.49 
  13   9  -1    0.67    0.35 
  13  -9   1   -0.08    0.58 
  13  -9   1    0.91    0.37 
  13   9   1    0.46    0.30 
  13   9   1    0.31    0.51 
 -13  -9   1    0.17    0.27 
  13  -9  -1    0.89    0.58 
 -13   9  -1    0.36    0.50 
  14   9  -1   13.32    0.79 
  14  -9   1   12.78    1.12 
  14  -9   1   11.92    1.21 
 -14   9   1   12.26    0.99 
 -14  -9  -1   11.98    0.84 
 -14   9  -1   13.34    0.99 
  14   9   1   11.13    1.04 
 -14  -9   1   12.43    0.88 
  14   9   1   11.72    0.72 
  15   9  -1    9.52    1.18 
 -15   9   1    7.94    0.86 
 -15  -9  -1    8.21    0.71 
  15  -9   1   10.87    1.24 
  15   9  -1   10.67    0.76 
 -15   9  -1    7.40    0.82 
  15   9   1    9.33    1.09 
 -15  -9   1    9.11    0.73 
  15   9   1   10.17    0.68 
 -16   9   1    0.48    0.64 
  16   9  -1    2.22    1.50 
  16   9  -1    0.43    0.96 
  16   9   1    1.81    0.49 
 -16   9  -1    0.89    0.58 
  16   9   1    1.93    0.86 
 -16  -9   1    1.20    0.41 
   0  10  -1   54.38    2.15 
   0 -10  -1   54.63    2.12 
   0  10   1   54.09    2.13 
   0  10   1   56.37    2.09 
   0 -10   1   54.46    2.11 
   0 -10  -1   57.44    1.96 
   0  10  -1   57.15    2.06 
   1 -10   1    0.50    0.14 
   1  10  -1    0.39    0.17 
  -1  10   1    0.35    0.16 
  -1  10   1    0.56    0.17 
   1 -10   1    0.19    0.13 
  -1 -10   1    0.57    0.15 
  -1  10  -1    0.39    0.19 
   1  10   1    0.39    0.16 
   1 -10  -1    0.65    0.15 
   1 -10  -1    0.84    0.17 
   1  10   1    0.42    0.14 
  -1  10  -1    0.59    0.21 
   2  10  -1   97.05    3.42 
  -2  10   1   95.40    3.44 
  -2  10   1   98.11    3.44 
   2  10  -1   98.23    3.24 
   2 -10   1   98.48    3.30 
   2 -10   1   95.04    3.42 
  -2  10  -1   97.01    3.44 
  -2  10  -1   97.66    3.46 
  -2 -10   1   99.76    3.36 
   2 -10  -1   93.29    3.41 
   2 -10  -1   97.71    3.29 
   2  10   1   94.73    3.39 
   2  10   1   97.81    3.22 
  -3  10   1    8.57    0.64 
   3 -10   1    9.67    0.61 
   3  10  -1    8.65    0.56 
   3 -10   1    9.74    0.55 
   3  10  -1   10.01    0.51 
  -3  10   1    8.87    0.59 
  -3  10  -1    8.96    0.59 
  -3  10  -1    9.73    0.62 
   3 -10  -1    9.34    0.54 
   3  10   1    9.48    0.58 
  -3 -10   1    8.63    0.53 
   3 -10  -1    9.55    0.60 
   3  10   1    9.81    0.49 
  -4  10   1    0.09    0.17 
   4 -10   1    0.28    0.16 
   4  10  -1   -0.01    0.17 
  -4  10   1    0.27    0.21 
  -4  10  -1   -0.01    0.20 
  -4  10  -1    0.07    0.18 
   4 -10  -1   -0.04    0.17 
   4  10   1   -0.18    0.16 
   4 -10  -1    0.32    0.16 
  -5  10   1   -0.10    0.18 
   5  10  -1    0.17    0.17 
   5 -10   1    0.48    0.18 
  -5  10   1    0.37    0.24 
   5 -10   1    0.62    0.21 
   5 -10  -1    0.20    0.19 
  -5  10  -1    0.09    0.20 
   5 -10  -1    0.39    0.17 
  -5  10  -1    0.22    0.25 
  -6  10   1    9.33    0.71 
   6  10  -1    9.01    0.58 
   6 -10   1   10.22    0.64 
   6 -10   1   10.01    0.65 
  -6  10   1    8.86    0.60 
  -6  10  -1    9.15    0.72 
   6 -10  -1    9.66    0.64 
   6  10   1    9.56    0.57 
  -6  10  -1    9.20    0.61 
   6 -10  -1    9.99    0.64 
   7 -10   1    7.95    0.59 
   7  10  -1    7.67    0.54 
  -7  10   1    7.86    0.56 
  -7  10   1    7.29    0.58 
   7 -10   1    8.34    0.59 
  -7  10   1    8.07    0.71 
   7 -10  -1    7.65    0.60 
   7 -10  -1    8.93    0.59 
   7  10   1    8.08    0.52 
  -7  10  -1    7.03    0.65 
  -7  10  -1    8.32    0.56 
  -7  10  -1    8.60    0.56 
  -8  10   1   23.91    1.24 
   8 -10   1   25.27    1.21 
   8  10  -1   23.93    1.12 
  -8  10   1   24.41    1.14 
  -8  10   1   23.41    1.39 
  -8  10   1   24.02    1.17 
   8 -10   1   24.06    1.20 
  -8  10  -1   23.80    1.36 
  -8  10  -1   25.91    1.14 
   8 -10  -1   23.63    1.25 
   8 -10  -1   23.72    1.18 
   8  10   1   24.73    1.09 
  -8  10  -1   24.34    1.23 
   9 -10   1    2.64    0.38 
  -9  10   1    2.16    0.44 
  -9  10   1    2.54    0.47 
  -9  10   1    2.77    0.56 
  -9  10   1    2.57    0.35 
   9  10  -1    2.44    0.35 
  -9  10  -1    2.43    0.46 
  -9  10  -1    3.23    0.38 
   9  10   1    1.92    0.34 
   9 -10  -1    2.56    0.39 
  -9  10  -1    2.79    0.48 
  -9  10  -1    2.35    0.46 
 -10  10   1   19.87    0.89 
 -10  10   1   20.31    1.18 
  10 -10   1   20.45    1.05 
  10  10  -1   19.73    0.97 
 -10  10   1   18.72    0.93 
 -10  10   1   17.50    1.22 
 -10  10  -1   19.12    1.13 
 -10 -10   1   20.00    1.05 
 -10  10  -1   19.62    0.87 
 -10  10  -1   20.52    0.88 
  10  10   1   18.28    0.90 
  10 -10  -1   17.68    1.02 
 -10  10  -1   18.28    1.27 
  11  10  -1   -0.36    0.29 
 -11  10   1   -0.02    0.51 
  11 -10   1    0.64    0.31 
 -11  10   1    0.57    0.40 
  11 -10   1    0.38    0.42 
 -11  10   1    0.30    0.27 
 -11  10  -1   -0.15    0.59 
 -11 -10   1   -0.08    0.22 
 -11  10  -1    0.31    0.45 
  11  10   1   -0.33    0.26 
  12 -10   1    9.21    0.73 
  12 -10   1   11.26    0.89 
 -12  10   1    8.48    0.85 
  12  10  -1    9.20    0.66 
 -12 -10   1    9.37    0.70 
 -12  10  -1    8.05    0.95 
  12 -10  -1   11.38    0.91 
  12  10   1   10.05    0.82 
  12  10   1    9.99    0.64 
 -12  10  -1   10.00    0.85 
 -13  10   1    0.71    0.52 
  13  10  -1    0.44    0.38 
  13 -10   1    1.41    0.60 
  13 -10   1    1.11    0.47 
 -13  10  -1    0.53    0.50 
  13 -10  -1    0.75    0.66 
 -13 -10   1    0.40    0.27 
  13  10   1    0.87    0.35 
  13  10   1    0.49    0.54 
 -14  10   1    1.55    0.58 
  14 -10   1    3.30    0.84 
  14 -10   1    2.47    0.49 
  14  10  -1    2.86    0.72 
  14  10  -1    2.45    0.48 
  14 -10  -1    3.05    0.79 
 -14  10  -1    2.88    0.59 
 -14 -10   1    2.23    0.43 
  14  10   1    1.98    0.78 
  15  10  -1    0.69    0.82 
  15  10  -1    1.69    0.54 
 -15  10   1    0.60    0.59 
  15  10   1    0.42    0.79 
 -15 -10   1    0.27    0.32 
  15  10   1    1.31    0.48 
 -15  10  -1    1.09    0.62 
  16  10   1    4.19    0.92 
   0  11  -1   -0.29    0.17 
   0  11   1   -0.13    0.17 
   0  11   1   -0.24    0.18 
   0 -11  -1    0.01    0.13 
   0 -11   1    0.10    0.16 
   1  11  -1   11.76    0.62 
   1 -11   1   11.77    0.70 
  -1  11   1   11.49    0.67 
   1  11  -1   10.70    0.68 
   1 -11   1   12.31    0.62 
  -1  11   1   10.66    0.68 
  -1  11  -1   11.37    0.69 
  -1  11  -1   11.49    0.70 
   1  11   1   11.02    0.68 
   1  11   1   11.93    0.62 
   1 -11  -1   11.01    0.69 
   1 -11  -1   12.16    0.59 
  -1 -11   1   11.16    0.65 
   2 -11   1   16.31    0.77 
  -2  11   1   14.71    0.85 
   2  11  -1   15.89    0.76 
   2  11  -1   16.38    0.88 
  -2  11   1   15.63    0.87 
   2 -11   1   16.41    0.88 
   2 -11  -1   16.49    0.78 
   2  11   1   16.09    0.85 
   2 -11  -1   15.12    0.85 
  -2  11  -1   16.48    0.90 
  -2 -11   1   16.41    0.84 
   2  11   1   16.06    0.75 
  -2  11  -1   16.07    0.89 
   3  11  -1   11.56    0.57 
   3 -11   1   10.08    0.66 
   3  11  -1   10.58    0.66 
   3 -11   1   10.91    0.61 
  -3  11   1   10.43    0.67 
  -3  11   1   10.07    0.70 
   3 -11  -1   10.04    0.65 
  -3 -11   1   10.48    0.62 
   3 -11  -1   10.63    0.60 
   3  11   1   10.58    0.64 
  -3  11  -1   10.56    0.68 
  -3  11  -1   10.63    0.71 
   3  11   1   10.27    0.54 
   4  11  -1   36.18    1.59 
  -4  11   1   37.94    1.64 
   4 -11   1   38.85    1.56 
   4 -11   1   36.93    1.63 
   4  11  -1   38.49    1.45 
  -4  11   1   37.76    1.73 
  -4  11  -1   37.88    1.71 
   4  11   1   37.53    1.39 
   4 -11  -1   38.80    1.56 
  -4  11  -1   37.41    1.64 
   4  11   1   38.18    1.58 
   4 -11  -1   38.10    1.65 
   5  11  -1   67.06    2.53 
   5 -11   1   67.82    2.51 
  -5  11   1   65.58    2.73 
   5 -11   1   65.97    2.58 
  -5  11   1   69.83    2.61 
  -5  11  -1   65.43    2.72 
   5 -11  -1   66.59    2.58 
   5  11   1   67.92    2.50 
   5  11   1   67.09    2.28 
   5 -11  -1   67.37    2.52 
  -5  11  -1   65.61    2.57 
  -6  11   1    9.28    0.63 
   6 -11   1    9.73    0.63 
  -6  11   1    9.30    0.71 
   6 -11   1    9.78    0.66 
   6  11  -1    9.61    0.62 
  -6  11  -1    9.36    0.76 
  -6  11  -1    9.43    0.63 
   6 -11  -1    9.99    0.65 
   6  11   1    9.13    0.60 
   6 -11  -1    9.22    0.62 
  -7  11   1   46.25    2.17 
   7  11  -1   47.94    1.90 
  -7  11   1   46.56    2.01 
   7 -11   1   45.24    2.05 
  -7  11   1   48.75    1.94 
   7 -11   1   45.05    1.94 
  -7  11  -1   47.23    1.92 
  -7  11  -1   44.70    1.94 
  -7  11  -1   45.59    2.16 
   7  11   1   47.61    1.85 
   7 -11  -1   45.56    1.95 
  -8  11   1   29.43    1.35 
   8 -11   1   29.13    1.40 
  -8  11   1   31.11    1.39 
  -8  11   1   28.85    1.62 
   8  11  -1   30.67    1.35 
  -8  11   1   29.41    1.46 
  -8  11  -1   30.73    1.45 
   8 -11  -1   29.89    1.41 
  -8  11  -1   27.11    1.57 
  -8  11  -1   31.28    1.36 
   8 -11  -1   29.54    1.44 
   8  11   1   30.08    1.30 
  -9  11   1   37.65    1.56 
   9 -11   1   37.00    1.66 
   9  11  -1   35.90    1.55 
  -9  11   1   35.90    1.76 
  -9  11   1   37.86    1.60 
  -9  11   1   32.62    2.44 
   9 -11  -1   37.14    1.69 
  -9  11  -1   37.78    1.75 
  -9  11  -1   37.96    1.54 
  -9  11  -1   38.76    1.58 
  -9  11  -1   33.50    2.11 
   9  11   1   36.53    1.51 
  10  11  -1   14.79    0.81 
  10 -11   1   14.89    0.89 
 -10  11   1   13.16    0.95 
 -10  11   1   16.10    0.83 
 -10  11   1   13.72    1.08 
 -10  11   1   14.53    0.75 
 -10  11  -1   14.05    0.93 
 -10  11  -1   13.10    1.02 
  10  11   1   13.47    0.76 
  10 -11  -1   12.66    0.88 
 -10  11  -1   14.67    0.79 
 -10  11  -1   15.37    0.77 
  11 -11   1    0.44    0.49 
  11  11  -1   -0.16    0.33 
 -11  11   1    0.43    0.43 
  11 -11   1    0.67    0.40 
 -11  11   1    0.70    0.56 
 -11  11   1   -0.01    0.34 
 -11  11  -1    0.35    0.59 
  11  11   1   -0.17    0.31 
 -11  11  -1    0.36    0.31 
 -11  11  -1   -0.07    0.44 
 -11  11  -1    0.54    0.28 
  12  11  -1   14.66    0.90 
  12 -11   1   15.48    1.08 
 -12  11   1   16.50    1.10 
  12 -11   1   16.29    0.99 
 -12  11  -1   15.68    1.10 
  12  11   1   17.32    0.89 
 -12  11  -1   15.07    1.27 
  12 -11  -1   16.79    1.12 
  13 -11   1    4.09    0.62 
 -13  11   1    1.93    0.59 
  13 -11   1    5.55    0.90 
  13  11  -1    3.83    0.60 
 -13  11  -1    2.91    0.79 
  13 -11  -1    3.89    0.67 
 -13  11  -1    2.50    0.58 
  13  11   1    3.26    0.57 
  14  11  -1    1.72    0.80 
  14 -11   1    1.63    0.83 
  14 -11   1    0.78    0.53 
 -14  11   1    0.62    0.53 
  14  11   1    0.93    0.75 
  14 -11  -1    1.25    0.95 
 -14  11  -1    0.64    0.57 
  15  11  -1    4.91    1.01 
 -15  11   1    2.74    0.61 
  15  11  -1    1.86    0.92 
 -15  11  -1    1.90    0.61 
  15  11   1    3.90    0.72 
  15  11   1    3.36    0.83 
   0  12   1    3.28    0.36 
   0  12  -1    3.65    0.35 
   0  12   1    3.32    0.35 
   0  12  -1    3.53    0.37 
   0 -12   1    3.96    0.38 
   1  12  -1  155.92    5.35 
   1 -12   1  151.85    5.29 
  -1  12   1  153.51    5.33 
  -1  12   1  158.89    5.29 
   1  12  -1  158.88    5.16 
   1 -12  -1  151.78    5.30 
   1 -12  -1  163.43    5.10 
  -1  12  -1  153.92    5.36 
   1  12   1  155.18    5.32 
  -1 -12   1  154.32    5.26 
  -1  12  -1  155.93    5.27 
   1  12   1  159.26    5.25 
  -2  12   1   71.12    2.72 
  -2  12   1   72.89    2.74 
   2  12  -1   70.79    2.72 
   2  12  -1   72.78    2.53 
   2 -12   1   69.37    2.69 
   2 -12   1   73.84    2.56 
  -2  12  -1   69.47    2.71 
  -2  12  -1   71.33    2.75 
   2 -12  -1   72.49    2.54 
   2  12   1   72.44    2.52 
  -2 -12   1   69.55    2.62 
   2 -12  -1   66.62    2.68 
   2  12   1   70.09    2.68 
   3 -12   1    0.92    0.19 
  -3  12   1    0.70    0.22 
   3 -12   1    0.68    0.19 
   3  12  -1    0.81    0.20 
  -3  12   1    0.09    0.27 
   3  12  -1    0.48    0.23 
   3 -12  -1    0.74    0.19 
  -3  12  -1    0.52    0.22 
  -3  12  -1    0.54    0.27 
   3 -12  -1    0.62    0.20 
   3  12   1    0.66    0.17 
  -4  12   1   11.13    0.80 
   4  12  -1   10.91    0.72 
   4  12  -1   12.49    0.62 
   4 -12   1   12.37    0.76 
   4 -12   1   12.22    0.67 
  -4  12   1   10.83    0.73 
  -4  12  -1   11.20    0.80 
   4 -12  -1   12.45    0.68 
   4 -12  -1   11.51    0.74 
   4  12   1   11.08    0.69 
   4  12   1   11.53    0.59 
  -4  12  -1   11.98    0.75 
  -5  12   1    5.54    0.58 
   5 -12   1    5.04    0.48 
   5  12  -1    5.90    0.38 
  -5  12   1    5.02    0.48 
   5  12  -1    4.66    0.45 
   5 -12   1    5.85    0.47 
   5 -12  -1    5.80    0.47 
  -5  12  -1    4.86    0.47 
   5  12   1    5.67    0.38 
   5 -12  -1    5.54    0.45 
   5  12   1    4.56    0.45 
  -5  12  -1    4.64    0.52 
  -6  12   1   35.72    1.61 
   6 -12   1   34.94    1.94 
   6 -12   1   35.88    1.63 
   6  12  -1   35.26    1.57 
  -6  12   1   33.50    1.73 
   6 -12  -1   35.36    1.76 
   6  12   1   36.95    1.36 
  -6  12  -1   35.36    1.60 
   6  12   1   37.33    1.55 
   6 -12  -1   37.48    1.66 
  -6  12  -1   34.25    1.76 
   7  12  -1    3.61    0.42 
  -7  12   1    4.50    0.46 
   7 -12   1    4.20    0.44 
   7 -12   1    3.87    0.47 
  -7  12   1    2.70    0.57 
  -7  12  -1    3.68    0.45 
   7 -12  -1    2.93    0.48 
   7  12   1    3.33    0.43 
  -7  12  -1    3.19    0.54 
   7 -12  -1    3.23    0.41 
   8  12  -1   29.52    1.32 
  -8  12   1   26.75    1.68 
  -8  12   1   28.03    1.32 
   8 -12   1   28.04    1.36 
  -8  12   1   27.66    1.41 
   8 -12  -1   28.87    1.39 
   8  12   1   29.15    1.29 
   8 -12  -1   27.39    1.38 
  -8  12  -1   28.71    1.33 
  -8  12  -1   26.74    1.38 
  -8  12  -1   24.45    2.05 
  -9  12   1    2.28    0.36 
  -9  12   1    0.93    0.49 
  -9  12   1    1.74    0.39 
   9  12  -1    1.82    0.33 
   9 -12   1    1.66    0.37 
   9  12   1    1.89    0.33 
  -9  12  -1    1.84    0.36 
  -9  12  -1    1.86    0.58 
  -9  12  -1    2.06    0.42 
 -10  12   1    6.45    0.68 
  10  12  -1    6.46    0.58 
 -10  12   1    5.35    0.85 
 -10  12   1    7.69    0.67 
 -10  12   1    6.94    0.55 
  10 -12   1    6.51    0.64 
  10  12   1    6.12    0.54 
 -10  12  -1    6.66    0.67 
 -10  12  -1    6.98    0.59 
 -10  12  -1    5.42    0.84 
  10 -12  -1    6.67    0.64 
 -10  12  -1    5.77    0.62 
  11 -12   1    9.56    0.86 
 -11  12   1   11.59    0.74 
  11 -12   1   12.05    0.82 
 -11  12   1   11.82    0.69 
 -11  12   1   10.58    0.88 
 -11  12   1    9.99    1.02 
  11  12  -1   11.37    0.78 
 -11  12  -1   11.35    0.68 
  11 -12  -1   11.26    0.96 
 -11  12  -1   10.74    0.84 
 -11  12  -1   12.35    1.05 
  11  12   1   10.40    0.72 
 -11  12  -1   10.94    0.66 
  12 -12   1   32.23    1.55 
  12  12  -1   30.47    1.44 
 -12  12   1   29.25    1.71 
  12 -12   1   31.09    1.63 
  12  12   1   31.43    1.42 
  12 -12  -1   32.67    1.65 
 -12  12  -1   28.71    1.80 
 -12  12  -1   32.17    1.74 
  13 -12   1    1.19    0.68 
  13 -12   1    0.31    0.47 
  13  12  -1    1.02    0.51 
  13 -12  -1    0.98    0.75 
  13  12   1    0.27    0.47 
 -13  12  -1    0.01    0.54 
 -13  12  -1    1.44    0.77 
  13  12   1    1.33    0.63 
 -14  12   1    0.50    0.60 
 -14  12  -1    0.82    0.63 
  14  12   1    1.46    0.78 
  15  12  -1    3.02    0.81 
 -15  12   1    1.19    0.65 
  15  12  -1    2.64    0.95 
  15  12   1    2.40    0.90 
  15  12   1    2.33    0.63 
 -15  12  -1    2.15    0.73 
   0  13  -1   -0.18    0.21 
   0  13  -1    0.25    0.23 
   0  13   1   -0.34    0.23 
   0  13   1   -0.01    0.23 
   0 -13   1    0.38    0.20 
   1  13  -1   14.26    0.84 
   1 -13   1   13.37    0.80 
  -1  13   1   13.59    0.81 
  -1  13   1   13.43    0.82 
   1  13  -1   13.87    0.75 
  -1  13  -1   13.63    0.79 
   1  13   1   14.26    0.75 
   1  13   1   13.32    0.80 
  -1 -13   1   13.55    0.79 
   1 -13  -1   14.81    0.70 
  -1  13  -1   12.42    0.80 
  -2  13   1    1.77    0.29 
   2 -13   1    1.91    0.28 
   2  13  -1    1.11    0.27 
   2  13  -1    1.06    0.23 
   2 -13   1    1.47    0.28 
  -2  13   1    0.98    0.29 
   2 -13  -1    1.43    0.25 
   2 -13  -1    1.74    0.27 
  -2  13  -1    1.05    0.34 
   2  13   1    1.37    0.28 
  -2 -13   1    1.35    0.29 
  -2  13  -1    1.71    0.36 
   2  13   1    1.67    0.30 
  -3  13   1   10.56    0.73 
   3  13  -1   11.52    0.62 
   3 -13   1   11.10    0.71 
   3 -13   1   11.82    0.65 
   3  13  -1   10.91    0.72 
  -3  13   1   10.56    0.76 
   3 -13  -1   10.37    0.70 
  -3  13  -1   10.41    0.78 
  -3  13  -1   10.11    0.70 
   3  13   1   11.87    0.60 
   3 -13  -1   11.19    0.64 
   3  13   1   10.23    0.70 
  -4  13   1    0.17    0.26 
   4 -13   1    0.34    0.22 
  -4  13   1    0.08    0.31 
   4  13  -1    0.55    0.21 
   4  13  -1    0.09    0.25 
   4 -13   1    0.76    0.23 
   4  13   1    0.29    0.19 
   4  13   1   -0.15    0.25 
   4 -13  -1    0.51    0.22 
  -4  13  -1    0.04    0.29 
   4 -13  -1    0.50    0.24 
  -4  13  -1    0.63    0.28 
   5 -13   1    7.75    0.57 
   5  13  -1    8.03    0.47 
   5  13  -1    6.64    0.57 
  -5  13   1    8.04    0.70 
  -5  13   1    6.38    0.57 
   5 -13   1    7.47    0.81 
   5 -13  -1    7.47    0.56 
   5 -13  -1    6.83    0.57 
  -5  13  -1    6.76    0.66 
   5  13   1    6.63    0.56 
  -5  13  -1    7.47    0.58 
   5  13   1    6.54    0.47 
  -6  13   1    1.37    0.43 
   6 -13   1    1.57    0.37 
   6 -13   1    1.11    0.32 
   6  13  -1    0.91    0.33 
  -6  13   1    0.77    0.30 
  -6  13  -1    0.70    0.30 
   6 -13  -1    1.40    0.35 
   6 -13  -1    1.36    0.29 
  -6  13  -1    1.04    0.41 
   6  13   1    1.38    0.29 
   7 -13   1    1.65    0.31 
   7 -13   1    1.26    0.34 
  -7  13   1    0.89    0.32 
  -7  13   1    1.51    0.42 
   7  13  -1    1.15    0.31 
   7 -13  -1    0.67    0.33 
   7 -13  -1    1.05    0.44 
   7  13   1    1.23    0.26 
  -7  13  -1    0.94    0.48 
  -7  13  -1    0.78    0.33 
   8 -13   1    5.99    0.58 
  -8  13   1    6.35    0.60 
  -8  13   1    4.23    0.56 
   8  13  -1    6.06    0.54 
  -8  13   1    4.75    0.73 
  -8  13  -1    5.61    0.56 
  -8  13  -1    6.61    0.57 
   8  13   1    5.60    0.52 
  -8  13  -1    4.77    0.72 
   8 -13  -1    4.81    0.58 
   9  13  -1    3.30    0.50 
  -9  13   1    2.09    0.40 
  -9  13   1    2.08    0.54 
  -9  13   1    1.83    0.46 
   9 -13  -1    2.40    0.51 
   9 -13  -1    2.82    0.48 
   9  13   1    2.84    0.43 
  -9  13  -1    3.18    0.55 
  -9  13  -1    2.10    0.56 
  -9  13  -1    3.70    0.55 
  10 -13   1    0.82    0.37 
 -10  13   1    0.37    0.44 
 -10  13   1    0.61    0.40 
  10  13  -1    0.60    0.40 
 -10  13   1    0.65    0.62 
 -10  13   1    0.34    0.49 
 -10  13  -1    0.58    0.59 
 -10  13  -1    0.32    0.42 
 -10  13  -1    0.05    0.45 
 -10  13  -1    1.36    0.47 
  10 -13  -1    0.60    0.49 
  11 -13   1    2.02    0.42 
  11 -13   1    2.08    0.55 
 -11  13   1    1.55    0.70 
 -11  13   1    1.79    0.53 
  11  13  -1    1.30    0.43 
 -11  13   1    2.35    0.50 
 -11  13  -1    0.88    0.68 
 -11  13  -1    2.18    0.43 
 -11  13  -1    3.21    0.66 
 -11  13  -1    1.32    0.50 
  11  13   1    1.51    0.42 
  12 -13   1    2.12    0.67 
 -12  13   1    3.76    0.58 
 -12  13   1    2.41    0.49 
 -12  13   1    1.66    0.85 
 -12  13   1    1.90    0.65 
  12  13  -1    3.16    0.55 
  12 -13   1    3.14    0.67 
  12  13   1    2.57    0.48 
 -12  13  -1    1.44    0.58 
  12 -13  -1    3.36    0.65 
 -12  13  -1    2.64    0.78 
  13 -13   1    4.18    0.59 
 -13  13   1    4.15    0.76 
 -13  13  -1    5.07    0.78 
  13  13   1    5.55    0.99 
 -13  13  -1    5.87    1.27 
  13  13   1    5.29    0.76 
 -14  13   1    1.44    0.63 
  14  13  -1    2.63    0.69 
  14  13   1    2.93    0.81 
  14  13   1    0.70    0.71 
 -14  13  -1    1.96    0.64 
   0  14  -1   19.01    0.99 
   0  14   1   19.33    1.03 
   0  14   1   20.04    1.07 
   0  14  -1   19.45    1.08 
   0 -14   1   19.52    1.06 
  -1  14   1   44.61    1.94 
   1  14  -1   46.13    2.01 
  -1  14   1   46.28    1.99 
   1  14  -1   45.72    1.85 
   1 -14   1   45.77    1.95 
  -1  14  -1   44.82    1.93 
   1  14   1   47.10    1.86 
  -1  14  -1   46.80    2.01 
   1 -14  -1   47.87    1.76 
  -1 -14   1   44.33    1.92 
   1  14   1   44.67    1.96 
   2  14  -1   87.86    3.07 
  -2  14   1   84.27    3.27 
  -2  14   1   85.12    3.27 
   2 -14   1   83.21    3.23 
   2 -14   1   89.23    3.06 
   2  14  -1   87.51    3.30 
  -2  14  -1   86.32    3.31 
  -2  14  -1   84.98    3.26 
   2  14   1   87.77    3.06 
   2  14   1   83.98    3.23 
   2 -14  -1   87.79    3.03 
  -2 -14   1   82.39    3.16 
   3 -14   1    0.48    0.24 
  -3  14   1   -0.48    0.35 
  -3  14   1   -0.04    0.29 
   3 -14   1    0.42    0.21 
   3  14  -1    0.15    0.29 
   3  14  -1    0.02    0.22 
   3  14   1   -0.40    0.28 
  -3  14  -1    0.10    0.29 
   3 -14  -1    0.33    0.23 
   3 -14  -1    0.41    0.24 
   3  14   1    0.04    0.24 
  -3  14  -1   -0.52    0.34 
   4  14  -1   15.56    0.92 
   4 -14   1   16.51    0.94 
   4  14  -1   13.71    0.77 
  -4  14   1   16.45    0.96 
  -4  14   1   15.56    0.98 
   4 -14   1   15.07    0.92 
   4  14   1   14.84    0.76 
   4 -14  -1   14.68    0.90 
   4 -14  -1   15.91    0.86 
   4  14   1   14.99    0.90 
  -4  14  -1   16.23    0.97 
  -4  14  -1   15.30    1.00 
  -5  14   1    3.59    0.49 
   5  14  -1    4.72    0.51 
   5  14  -1    5.49    0.44 
   5 -14   1    5.12    0.45 
  -5  14   1    3.62    0.60 
   5  14   1    4.67    0.39 
   5 -14  -1    4.66    0.46 
   5  14   1    3.85    0.49 
  -5  14  -1    4.69    0.54 
  -6  14   1   20.82    1.11 
  -6  14   1   19.10    1.25 
   6 -14   1   19.74    1.13 
   6  14  -1   20.26    1.11 
   6  14  -1   20.73    0.93 
   6 -14   1   19.65    1.04 
   6  14   1   18.70    1.04 
   6  14   1   21.75    0.94 
   6 -14  -1   20.99    1.06 
  -6  14  -1   19.61    1.10 
   6 -14  -1   19.22    1.12 
  -6  14  -1   20.26    1.26 
  -7  14   1    0.34    0.51 
  -7  14   1    0.47    0.37 
   7  14  -1    0.98    0.35 
   7 -14   1    1.03    0.31 
   7 -14  -1    0.99    0.32 
   7  14   1    0.68    0.35 
  -7  14  -1    0.59    0.36 
  -7  14  -1    0.64    0.52 
   8  14  -1   38.85    1.75 
   8 -14   1   40.25    1.83 
  -8  14   1   39.18    1.87 
   8 -14   1   37.27    1.85 
  -8  14   1   38.53    2.00 
  -8  14   1   38.59    1.76 
   8  14   1   38.91    1.72 
  -8  14  -1   36.70    2.03 
  -8  14  -1   39.01    1.83 
   8  14   1   39.12    1.49 
   8 -14  -1   40.48    1.84 
  -8  14  -1   40.10    1.78 
  -9  14   1    4.37    0.59 
   9 -14   1    4.02    0.65 
  -9  14   1    2.84    0.59 
   9  14  -1    2.42    0.52 
  -9  14   1    3.81    0.70 
  -9  14   1    2.33    0.63 
   9 -14   1    3.75    0.57 
   9 -14  -1    2.31    0.48 
   9  14   1    3.02    0.45 
  -9  14  -1    3.14    0.63 
  -9  14  -1    3.82    0.64 
  -9  14  -1    3.59    0.59 
 -10  14   1    6.65    0.68 
 -10  14   1    5.51    0.82 
  10  14  -1    5.89    0.90 
  10 -14   1    6.39    0.67 
  10 -14   1    5.96    0.79 
 -10  14   1    5.72    0.70 
 -10  14   1    6.35    0.98 
 -10  14  -1    6.95    0.96 
 -10  14  -1    7.00    0.74 
 -10  14  -1    5.13    0.75 
  10 -14  -1    6.18    0.80 
 -10  14  -1    5.80    0.70 
  10  14   1    4.46    0.64 
  11  14  -1    3.18    0.54 
 -11  14   1    2.82    0.77 
 -11  14   1    4.32    0.84 
  11 -14   1    3.54    0.65 
 -11  14   1    2.25    0.58 
 -11  14  -1    3.06    0.58 
 -11  14  -1    2.59    0.84 
 -11  14  -1    3.38    0.54 
 -11  14  -1    3.35    0.61 
  11 -14  -1    3.03    0.62 
  12  14  -1   14.22    1.07 
 -12  14   1   16.49    1.01 
 -12  14   1   16.05    1.43 
 -12  14   1   18.10    1.28 
 -12  14   1   17.91    0.97 
  12 -14   1   17.87    1.19 
  12 -14   1   16.42    1.13 
 -12  14  -1   16.05    0.89 
 -12  14  -1   20.08    0.96 
 -12  14  -1   19.32    1.53 
  12 -14  -1   15.81    1.23 
 -12  14  -1   17.48    1.21 
  12  14   1   17.13    1.07 
  13 -14   1    1.44    0.61 
  13  14  -1    2.22    0.65 
 -13  14   1    1.77    0.63 
 -13  14  -1    2.21    0.61 
 -13  14  -1    3.59    0.98 
  13  14   1    1.97    0.63 
 -14  14   1    0.85    0.65 
  14  14  -1    2.55    0.83 
  14  14   1    0.99    0.85 
 -14  14  -1    1.47    0.76 
   0  15  -1    0.17    0.28 
   0  15   1    0.26    0.32 
   0  15   1    0.09    0.29 
   0 -15   1    0.35    0.25 
   0  15  -1    0.25    0.35 
  -1  15   1   19.17    1.07 
   1  15  -1   18.76    1.19 
   1 -15   1   20.19    1.08 
   1  15  -1   21.48    1.03 
  -1  15  -1   19.29    1.07 
   1  15   1   18.16    1.19 
  -1 -15   1   19.19    1.05 
   1  15   1   19.91    1.00 
  -1  15  -1   21.32    1.28 
   2  15  -1   -0.19    0.27 
   2  15  -1    0.06    0.36 
  -2  15   1    0.06    0.33 
   2 -15  -1    0.00    0.22 
  -2  15  -1   -0.17    0.32 
   2  15   1    0.06    0.26 
   3  15  -1   27.95    1.24 
  -3  15   1   28.83    1.45 
   3 -15   1   27.21    1.46 
  -3  15   1   28.26    1.45 
   3  15  -1   27.69    1.52 
   3 -15   1   29.48    1.27 
   3  15   1   27.90    1.22 
  -3  15  -1   28.87    1.45 
   3 -15  -1   29.27    1.33 
  -3  15  -1   29.54    1.45 
   3  15   1   24.93    1.71 
  -4  15   1   11.30    0.79 
  -4  15   1   11.37    0.84 
   4 -15   1   10.51    0.66 
   4  15  -1   10.88    0.65 
   4  15  -1   10.63    0.77 
   4 -15   1   11.22    0.77 
   4  15   1   10.60    0.63 
  -4  15  -1   11.20    0.78 
   4  15   1    8.73    1.02 
   4 -15  -1   10.76    0.66 
  -4  15  -1    9.84    0.80 
   5 -15   1   11.19    0.73 
   5  15  -1   11.36    0.68 
   5  15  -1   11.69    0.80 
  -5  15   1   11.52    0.87 
  -5  15   1   10.29    0.81 
   5 -15   1   12.78    0.80 
  -5  15  -1   12.12    0.82 
   5  15   1   10.15    0.88 
   5  15   1   11.70    0.65 
   5 -15  -1   13.37    0.75 
  -5  15  -1   11.25    0.91 
  -6  15   1    6.53    0.83 
   6  15  -1    9.27    0.58 
   6  15  -1    8.90    0.69 
   6 -15   1    7.92    0.67 
  -6  15   1    6.56    0.67 
   6  15   1    7.09    0.52 
   6  15   1    7.98    0.73 
  -6  15  -1    7.05    0.67 
  -6  15  -1    6.31    0.74 
   6 -15  -1    8.41    0.83 
  -7  15   1    1.93    0.62 
   7  15  -1    1.25    0.40 
   7 -15   1    1.45    0.52 
   7  15  -1    1.03    0.31 
  -7  15   1    0.49    0.42 
   7  15   1    0.84    0.32 
  -7  15  -1    0.64    0.46 
  -7  15  -1    1.53    0.59 
   8  15  -1    0.43    0.36 
  -8  15   1    0.45    0.45 
  -8  15   1    0.76    0.44 
   8  15  -1    0.23    0.43 
  -8  15   1   -0.79    0.61 
   8 -15   1   -0.38    0.43 
   8 -15   1    1.06    0.40 
   8  15   1    0.04    0.40 
  -8  15  -1    0.31    0.44 
   8 -15  -1   -0.01    0.47 
  -8  15  -1   -0.14    0.59 
   9 -15   1    3.33    0.70 
   9  15  -1    2.41    0.48 
  -9  15   1    2.40    0.69 
  -9  15   1    2.62    0.91 
  -9  15  -1    3.45    0.71 
  -9  15  -1    3.68    0.62 
   9  15   1    2.04    0.46 
  -9  15  -1    2.76    0.67 
   9 -15  -1    4.13    0.74 
 -10  15   1    6.26    0.77 
  10  15  -1    5.28    0.76 
 -10  15   1    4.85    0.72 
  10 -15   1    5.39    0.72 
 -10  15   1    6.88    1.10 
 -10  15   1    4.63    0.91 
  10 -15   1    6.33    0.83 
 -10  15  -1    5.46    0.73 
  10  15   1    6.82    0.62 
  10 -15  -1    5.06    0.88 
 -10  15  -1    4.99    1.10 
 -10  15  -1    6.40    0.83 
 -10  15  -1    6.25    0.86 
 -11  15   1    2.86    0.62 
 -11  15   1    2.67    0.64 
 -11  15   1    2.99    0.69 
  11 -15   1    3.08    0.55 
  11  15  -1    2.80    0.58 
 -11  15  -1    2.75    0.84 
  11  15   1    3.17    0.58 
  11 -15  -1    2.10    0.71 
 -11  15  -1    1.67    0.58 
 -11  15  -1    1.86    0.66 
 -11  15  -1    4.59    0.85 
  12  15  -1   -0.57    0.66 
 -12  15   1    2.93    0.97 
 -12  15   1    2.38    0.69 
 -12  15   1    0.40    0.64 
 -12  15   1    0.82    0.62 
  12 -15   1    0.31    0.58 
 -12  15  -1   -0.07    1.09 
 -12  15  -1    1.08    0.68 
 -12  15  -1    0.79    0.64 
 -12  15  -1    0.95    0.60 
  12  15   1    0.49    0.61 
 -13  15   1    2.80    0.69 
  13  15   1    2.79    0.83 
 -13  15  -1    2.82    1.08 
 -13  15  -1    2.87    0.72 
   0  16   1   36.53    1.64 
   0 -16   1   33.45    1.87 
   0  16  -1   38.15    1.66 
   1 -16   1    6.62    0.58 
   1  16  -1    5.23    0.53 
   1  16  -1    5.92    0.65 
  -1  16   1    4.21    0.58 
   1  16   1    5.11    0.54 
  -1  16  -1    5.07    0.57 
   1  16   1    5.89    0.62 
  -2  16   1   21.07    1.21 
  -2  16   1   23.66    1.49 
   2 -16   1   23.15    1.23 
   2  16  -1   23.05    1.24 
   2  16  -1   21.49    1.11 
   2  16   1   21.65    1.08 
   2  16   1   22.36    1.23 
  -2  16  -1   22.48    1.25 
  -2  16  -1   22.69    1.23 
   3 -16   1   11.47    0.70 
   3  16  -1   10.47    0.69 
   3  16  -1   12.47    0.85 
   3 -16   1   12.83    0.83 
  -3  16   1   12.47    0.89 
  -3  16   1   12.46    0.90 
   3  16   1   10.64    0.80 
  -3  16  -1   11.86    0.85 
   3  16   1   11.79    0.69 
  -3  16  -1   12.13    0.85 
   3 -16  -1   11.50    0.70 
  -4  16   1    8.67    0.75 
   4  16  -1    6.14    0.53 
   4  16  -1    6.78    0.68 
   4 -16   1    7.56    0.66 
   4 -16   1    7.74    0.56 
  -4  16   1    7.72    0.81 
   4  16   1    6.65    0.66 
   4  16   1    7.73    0.57 
  -4  16  -1    7.71    0.70 
  -4  16  -1    5.13    0.86 
   4 -16  -1    7.65    0.58 
   5  16  -1    1.34    0.31 
  -5  16   1    0.27    0.57 
   5  16  -1    0.86    0.42 
  -5  16   1    0.70    0.47 
   5 -16   1    1.44    0.37 
   5  16   1    1.55    0.31 
  -5  16  -1    1.00    0.52 
   5  16   1    1.14    0.40 
  -5  16  -1    0.99    0.45 
   5 -16  -1    2.14    0.47 
  -6  16   1   11.57    1.01 
   6  16  -1   12.32    0.89 
   6  16  -1   11.41    0.76 
   6 -16   1   15.12    0.94 
  -6  16   1   14.36    1.12 
   6  16   1   12.29    0.89 
  -6  16  -1   12.78    0.98 
   6  16   1   12.64    0.71 
  -6  16  -1   12.89    0.91 
   7  16  -1   35.00    1.67 
   7 -16   1   34.19    1.71 
   7  16  -1   36.39    1.48 
  -7  16   1   33.52    1.71 
  -7  16   1   34.32    1.82 
   7 -16   1   34.01    1.57 
  -7  16  -1   33.86    1.68 
   7 -16  -1   35.73    1.59 
   7  16   1   33.80    1.39 
  -7  16  -1   32.64    1.87 
   7  16   1   35.07    1.64 
   8  16  -1    7.66    0.75 
   8 -16   1    6.13    0.69 
  -8  16   1    5.71    0.74 
   8  16  -1    7.38    0.62 
  -8  16   1    4.94    0.75 
   8 -16   1    6.54    0.72 
  -8  16   1    6.65    0.67 
   8 -16  -1    7.07    0.75 
  -8  16  -1    5.57    0.97 
   8  16   1    6.09    0.72 
  -8  16  -1    5.76    0.68 
   8  16   1    5.15    0.59 
  -8  16  -1    6.66    0.82 
  -9  16   1   10.28    0.89 
  -9  16   1   10.24    1.13 
   9 -16   1    8.37    0.87 
   9 -16   1    8.57    0.82 
   9  16  -1   11.04    1.10 
   9  16  -1   11.06    0.75 
  -9  16   1   10.43    0.86 
   9  16   1    8.79    0.82 
  -9  16  -1    9.32    0.80 
  -9  16  -1   10.14    1.14 
  -9  16  -1   12.50    0.94 
   9  16   1   10.98    0.72 
   9 -16  -1   10.05    0.90 
 -10  16   1   13.80    1.02 
  10  16  -1   13.80    0.87 
  10  16  -1   13.04    1.17 
 -10  16   1   13.28    0.98 
  10 -16   1   12.09    0.99 
 -10  16   1   12.14    1.14 
 -10  16   1   13.24    1.36 
  10 -16   1   13.88    1.03 
  10  16   1   15.88    0.85 
 -10  16  -1   12.08    0.99 
  10  16   1   14.52    1.31 
 -10  16  -1   12.00    1.31 
 -10  16  -1   14.32    1.12 
  10 -16  -1   16.36    1.12 
  11  16  -1    8.04    0.95 
 -11  16   1    8.50    0.87 
 -11  16   1    6.74    1.38 
  11  16   1    6.08    1.07 
  11  16   1    8.25    0.77 
 -11  16  -1   10.00    0.92 
 -11  16  -1    6.54    1.10 
 -11  16  -1    9.52    1.04 
 -11  16  -1    7.28    1.11 
  12  16  -1    2.68    0.76 
 -12  16   1    3.76    0.77 
 -12  16   1    5.38    1.07 
 -12  16   1    3.71    1.08 
 -12  16   1    3.25    0.85 
  12  16   1    4.65    0.81 
 -12  16  -1    2.80    0.68 
  12  16   1    5.17    1.00 
 -12  16  -1    4.13    0.74 
 -12  16  -1    5.39    1.11 
 -12  16  -1    1.63    1.13 
   0  17  -1   -0.38    0.37 
   0  17   1   -0.49    0.39 
   0 -17   1    0.04    0.32 
   1  17  -1    4.80    0.56 
   1 -17   1    4.84    0.58 
   1  17   1    5.30    1.05 
   1  17   1    6.00    0.57 
  -1  17  -1    5.41    0.60 
  -2  17   1    0.19    0.44 
   2 -17   1    0.34    0.32 
   2  17   1    0.03    0.36 
   2  17   1    0.35    0.62 
  -2  17  -1    0.22    0.45 
   3 -17   1    1.54    0.37 
  -3  17   1    1.36    0.51 
   3  17  -1    1.36    0.94 
   3  17  -1    0.68    0.37 
   3 -17  -1    1.49    0.33 
   3  17   1    1.40    0.76 
  -3  17  -1    1.08    0.57 
   3  17   1    1.12    0.37 
   4  17  -1   18.65    1.46 
   4  17  -1   19.48    1.02 
   4 -17   1   20.32    1.17 
  -4  17   1   20.00    1.29 
  -4  17  -1   20.29    1.22 
   4  17   1   20.53    1.00 
  -5  17   1    4.83    0.82 
   5 -17   1    4.07    0.57 
   5  17  -1    3.19    0.58 
   5 -17   1    3.39    0.54 
  -5  17   1    3.16    0.70 
   5  17  -1    3.59    0.49 
  -5  17  -1    5.18    0.76 
   5  17   1    3.01    0.97 
   5  17   1    4.04    0.54 
   6  17  -1    0.90    0.51 
   6 -17   1    1.21    0.41 
  -6  17   1   -0.43    0.69 
   6 -17   1    1.08    0.40 
   6  17  -1    0.80    0.36 
  -6  17   1    1.85    0.63 
   6 -17  -1    1.50    0.45 
   6  17   1    1.05    0.54 
   6  17   1    1.24    0.36 
  -6  17  -1    2.00    0.62 
  -7  17   1    4.36    0.95 
   7  17  -1    5.87    0.80 
  -7  17   1    6.59    0.96 
   7 -17   1    4.59    0.65 
   7  17  -1    4.23    0.61 
  -7  17  -1    4.13    0.72 
   7 -17  -1    5.26    0.70 
   7  17   1    4.74    0.73 
   7  17   1    3.70    0.55 
   8  17  -1    5.05    0.85 
   8  17  -1    5.68    0.68 
  -8  17   1    3.46    0.86 
   8 -17   1    5.72    0.75 
   8 -17   1    5.07    0.70 
   8  17   1    3.98    0.78 
  -8  17  -1    4.47    0.86 
   8 -17  -1    4.51    0.79 
   9 -17   1   16.22    1.13 
   9 -17   1   16.66    1.08 
  -9  17   1   18.42    1.16 
   9  17  -1   17.93    0.97 
  -9  17   1   16.66    1.40 
   9  17  -1   16.78    1.16 
   9  17   1   17.14    1.12 
   9  17   1   16.05    0.93 
   9 -17  -1   15.95    1.12 
  -9  17  -1   17.80    1.38 
  -9  17  -1   15.14    1.12 
 -10  17   1   -0.01    0.83 
  10  17  -1    0.30    0.68 
  10  17  -1    1.46    0.54 
 -10  17   1    0.67    0.95 
 -10  17   1    1.03    0.58 
  10 -17   1    0.74    0.60 
  10 -17  -1    2.57    0.90 
 -10  17  -1    1.30    0.60 
 -10  17  -1    0.95    0.94 
  10  17   1    1.92    0.67 
  10  17   1    0.41    0.55 
 -10  17  -1    2.44    0.80 
  11  17  -1    9.33    1.13 
 -11  17   1   12.28    1.39 
  11 -17   1   11.01    1.10 
 -11  17   1    8.86    1.57 
 -11  17   1   13.32    1.08 
 -11  17   1   13.51    1.25 
  11  17  -1   11.44    0.97 
 -11  17  -1   13.24    1.00 
 -11  17  -1   12.55    1.57 
  11  17   1   14.59    0.97 
  11  17   1   15.68    1.16 
 -11  17  -1   13.24    1.24 
 -11  17  -1   10.22    1.31 
 -12  17   1    3.35    0.85 
  12  17  -1    5.26    1.14 
  12  17  -1    7.79    1.21 
 -12  17   1    4.18    1.18 
 -12  17  -1    6.18    0.92 
  12  17   1    5.68    1.01 
 -12  17  -1    3.61    0.95 
 -12  17  -1    5.87    1.25 
   0  18   1   -0.44    0.45 
   0  18  -1    0.03    0.44 
   1  18  -1    6.78    0.79 
  -1  18   1    5.95    0.71 
   1  18  -1    6.83    0.65 
  -1  18  -1    5.89    1.18 
   1  18   1    6.15    0.67 
   1  18   1    5.53    0.74 
   2  18  -1    2.83    0.56 
  -2  18   1    4.25    0.61 
   2 -18   1    3.07    0.59 
  -2  18   1    4.17    0.71 
   2  18  -1    4.39    0.58 
  -2  18  -1    3.01    0.66 
  -2  18  -1    3.77    0.76 
   2  18   1    3.51    0.70 
   2  18   1    3.19    0.50 
  -3  18   1    1.23    0.54 
   3  18  -1    1.14    0.52 
   3  18  -1    0.66    0.40 
  -3  18   1    0.49    0.53 
   3 -18   1    0.86    0.40 
   3  18   1    0.45    0.41 
   3  18   1    0.83    0.53 
  -3  18  -1    1.39    0.52 
  -3  18  -1    0.92    0.53 
   4  18  -1    2.65    0.53 
   4 -18   1    3.92    0.56 
   4  18  -1    3.82    0.56 
   4 -18   1    4.46    0.62 
  -4  18   1    4.18    0.60 
   4  18   1    3.21    0.56 
  -4  18  -1    3.83    0.60 
  -4  18  -1    3.61    0.63 
   4  18   1    4.00    0.76 
   5  18  -1    2.65    0.56 
   5 -18   1    3.06    0.62 
   5  18  -1    2.59    0.55 
  -5  18   1    3.89    0.83 
  -5  18   1    4.82    0.89 
   5 -18   1    3.38    0.45 
   5 -18  -1    3.20    0.59 
   5  18   1    3.10    0.59 
   5  18   1    3.32    0.45 
  -5  18  -1    4.79    0.87 
  -5  18  -1    1.70    0.60 
  -6  18   1    4.69    0.86 
   6  18  -1    3.76    0.58 
   6 -18   1    5.11    0.71 
  -6  18   1    4.66    0.86 
   6 -18   1    4.93    0.68 
   6  18   1    5.86    0.84 
  -6  18  -1    6.04    0.97 
   6 -18  -1    4.61    0.67 
   6  18   1    4.40    0.81 
   7  18  -1   22.09    1.32 
   7  18  -1   20.52    1.06 
  -7  18   1   20.35    1.29 
   7 -18   1   20.44    1.15 
  -7  18   1   21.31    1.44 
   7 -18   1   21.57    1.30 
  -7  18  -1   21.42    1.47 
  -7  18  -1   21.84    1.31 
   7  18   1   21.83    1.29 
   7 -18  -1   20.50    1.15 
   7  18   1   19.44    1.05 
   8  18  -1    0.42    0.69 
  -8  18   1    1.20    0.70 
   8 -18   1   -0.23    0.58 
   8 -18   1    0.32    0.53 
  -8  18   1   -0.52    0.87 
   8  18  -1    0.74    0.49 
  -8  18  -1    1.61    0.73 
   8  18   1    0.64    0.65 
  -8  18  -1    0.23    0.93 
   8  18   1    0.00    0.45 
   8 -18  -1    0.40    0.61 
   9 -18   1    0.59    0.99 
   9 -18   1   -0.52    0.61 
  -9  18   1    1.23    0.95 
  -9  18   1    0.62    0.76 
   9  18  -1    1.03    0.73 
  -9  18   1    0.56    0.61 
   9  18  -1    0.11    0.56 
  -9  18  -1    1.02    0.82 
  -9  18  -1    0.12    0.96 
   9 -18  -1    1.39    0.71 
   9  18   1    1.87    0.69 
   9  18   1   -0.34    0.49 
  -9  18  -1    0.31    0.56 
 -10  18   1    2.54    1.05 
  10  18  -1    3.56    0.82 
 -10  18   1    2.93    0.97 
 -10  18   1    3.09    0.66 
  10  18  -1    5.41    0.89 
 -10  18   1    4.20    0.87 
  10  18   1    4.02    0.83 
 -10  18  -1    5.29    0.95 
 -10  18  -1    5.00    0.79 
 -10  18  -1    4.17    1.23 
  10  18   1    3.79    0.59 
  11  18  -1    1.57    0.89 
 -11  18   1    3.03    1.29 
 -11  18   1    2.76    1.09 
 -11  18   1    2.51    1.18 
 -11  18   1    2.44    0.72 
 -11  18  -1    1.98    1.05 
 -11  18  -1    2.49    1.21 
   0  19  -1   -0.46    0.51 
   0  19   1    0.50    0.53 
   0  19  -1   -0.40    0.58 
   0  19   1    0.56    0.58 
   1  19  -1    1.55    0.60 
  -1  19   1   -0.32    0.58 
  -1  19  -1    0.51    0.59 
   1  19   1    0.01    0.49 
   1  19   1    1.56    0.58 
  -1  19  -1   -0.45    0.54 
  -2  19   1    1.45    0.62 
  -2  19   1    1.00    0.61 
   2  19  -1    1.64    0.49 
   2  19  -1    2.58    0.61 
   2  19   1    1.80    0.50 
  -2  19  -1    0.77    0.62 
  -2  19  -1    0.48    0.60 
  -3  19   1    0.50    0.63 
   3  19  -1    1.60    0.62 
  -3  19   1    0.17    0.62 
   3  19  -1    0.37    0.46 
  -3  19  -1    0.31    0.63 
   3  19   1    0.41    0.47 
   3  19   1    1.20    0.58 
  -3  19  -1    0.55    0.62 
   4  19  -1    4.79    0.72 
  -4  19   1    6.86    0.91 
  -4  19   1    4.33    0.96 
   4  19  -1    4.91    0.64 
   4 -19   1    3.95    0.73 
   4  19   1    4.64    0.88 
  -4  19  -1    5.73    0.92 
  -4  19  -1    5.02    0.71 
   4  19   1    4.74    0.65 
   4 -19  -1    4.54    0.65 
   5  19  -1    1.88    0.52 
  -5  19   1    1.12    0.78 
   5  19  -1    1.56    0.67 
   5 -19   1    1.21    0.47 
  -5  19   1    1.45    0.66 
  -5  19  -1    2.36    0.74 
   5  19   1   -0.20    0.71 
  -5  19  -1    0.63    0.67 
   5  19   1    1.67    0.48 
   5 -19  -1    1.15    0.47 
   6 -19   1    1.51    0.52 
   6  19  -1    2.49    0.55 
  -6  19   1    0.62    0.69 
   6 -19   1    1.59    0.54 
  -6  19   1    1.29    0.87 
  -6  19  -1    1.61    0.73 
   6  19   1    1.79    0.68 
   6 -19  -1    1.71    0.52 
  -6  19  -1    1.57    0.88 
   7  19  -1    6.08    1.07 
  -7  19   1    6.11    1.05 
   7 -19   1    6.24    0.89 
   7 -19   1    5.17    0.64 
   7  19  -1    3.85    0.70 
   7 -19  -1    5.39    0.83 
  -7  19  -1    7.54    1.24 
   8  19  -1    3.86    0.74 
   8 -19   1    3.60    1.01 
  -8  19   1    5.41    1.11 
  -8  19   1    3.07    0.83 
   8  19  -1    4.68    0.83 
  -8  19  -1    3.82    1.06 
   8  19   1    4.79    0.78 
   8 -19  -1    4.60    0.91 
  -8  19  -1    5.66    1.19 
   8  19   1    6.03    1.07 
  -9  19   1    6.45    1.22 
  -9  19   1    5.52    0.93 
   9  19  -1    4.74    1.08 
  -9  19   1    4.60    0.86 
   9  19  -1    3.29    0.87 
  -9  19  -1    6.80    1.38 
   9  19   1    4.65    0.86 
   9  19   1    5.18    0.84 
  -9  19  -1    6.20    0.84 
  -9  19  -1    6.96    1.54 
  10  19  -1   -0.17    0.92 
 -10  19   1   -1.02    1.12 
 -10  19   1    1.19    1.33 
  10  19  -1    0.28    0.72 
 -10  19   1    1.65    1.08 
 -10  19   1    1.01    1.01 
 -10  19  -1    1.53    0.71 
  10  19   1    1.14    0.64 
 -10  19  -1    1.25    1.21 
 -10  19  -1    2.98    1.09 
   0  20  -1    1.39    0.71 
   0  20   1    1.14    0.60 
   0  20  -1   -0.53    0.59 
   0  20   1    0.23    0.67 
   1  20  -1    3.40    0.61 
  -1  20   1    5.12    0.99 
  -1  20   1    3.90    0.85 
   1  20  -1    4.52    0.74 
   1  20   1    3.57    0.68 
  -1  20  -1    4.51    0.75 
  -1  20  -1    3.92    0.82 
  -2  20   1    5.03    1.07 
  -2  20   1    5.78    0.91 
   2  20  -1    5.56    1.04 
   2  20  -1    4.69    0.77 
   2  20   1    6.11    0.96 
  -2  20  -1    4.90    0.88 
  -2  20  -1    6.50    1.11 
   2  20   1    5.29    0.90 
  -3  20   1    6.84    1.06 
   3  20  -1    5.56    1.08 
  -3  20   1    7.38    0.99 
   3  20  -1    6.61    0.76 
   3  20   1    6.91    0.79 
  -3  20  -1    5.85    0.78 
  -3  20  -1    7.13    0.96 
   3  20   1    7.38    1.02 
   4  20  -1    2.71    0.75 
   4  20  -1    1.83    0.57 
  -4  20   1    2.99    0.79 
  -4  20  -1    1.04    0.76 
  -4  20  -1    3.42    0.77 
   4 -20  -1    1.73    0.50 
   4  20   1    1.59    0.56 
   4  20   1    3.05    0.74 
  -5  20   1   11.99    1.21 
   5  20  -1   12.29    1.08 
   5  20  -1   15.09    1.28 
  -5  20   1   13.57    1.28 
  -5  20  -1   16.13    1.28 
   5 -20  -1   12.07    0.95 
   5  20   1   12.97    0.93 
  -5  20  -1   14.57    1.22 
  -6  20   1    0.51    0.82 
   6 -20   1   -0.37    0.61 
   6  20  -1    1.36    0.69 
  -6  20   1   -0.72    0.95 
   6  20  -1    0.19    0.80 
   6  20   1    1.18    0.78 
  -6  20  -1    1.93    0.91 
   6 -20  -1    0.70    0.61 
  -6  20  -1    0.56    0.84 
   6  20   1    0.95    0.58 
   7  20  -1    3.26    0.86 
  -7  20   1    0.90    1.09 
  -7  20   1    3.31    0.87 
  -7  20  -1    2.05    1.05 
   7 -20  -1    1.64    0.69 
   7  20   1    1.31    0.59 
   7  20   1    2.69    0.84 
  -7  20  -1    0.49    0.88 
  -8  20   1    0.99    0.95 
  -8  20   1    2.47    1.24 
   8  20  -1    0.35    0.61 
   8  20   1   -0.26    0.61 
  -8  20  -1   -1.92    1.21 
  -8  20  -1    1.74    1.13 
   8  20   1    1.43    0.86 
   9  20  -1   -0.09    0.99 
  -9  20   1    1.86    1.05 
   9  20   1    1.92    0.96 
  -9  20  -1    1.29    1.13 
   0  21   1    0.83    0.80 
   0  21  -1    0.89    0.68 
   0  21  -1   -0.51    0.81 
   0  21   1    0.18    0.71 
  -1  21   1   16.97    1.23 
   1  21  -1   16.15    1.38 
   1  21  -1   17.83    1.14 
  -1  21   1   19.49    1.36 
  -1  21  -1   17.03    1.20 
   1  21   1   17.30    1.36 
   1  21   1   15.09    1.15 
  -1  21  -1   18.08    1.39 
   2  21  -1    2.86    0.83 
  -2  21   1    2.97    0.81 
   2  21  -1    3.16    0.65 
  -2  21   1    3.11    0.86 
  -2  21  -1    1.98    0.76 
   2  21   1    3.45    0.70 
   2  21   1    3.23    0.84 
  -2  21  -1    1.71    0.90 
  -3  21   1   14.21    1.24 
   3  21  -1   13.76    1.34 
  -3  21   1   14.24    1.30 
   3  21  -1   12.24    0.97 
   3  21   1   12.21    1.35 
  -3  21  -1   11.77    1.19 
   4  21  -1   -0.04    0.87 
  -4  21   1    1.62    0.93 
   4  21  -1   -0.21    0.65 
  -4  21   1   -0.22    0.89 
   4  21   1    0.06    0.69 
  -4  21  -1   -0.06    0.89 
   4  21   1    0.42    0.85 
   5  21  -1    3.32    0.68 
   5  21  -1    3.75    0.95 
  -5  21   1    2.11    0.92 
  -5  21   1    1.42    1.09 
   5  21   1    2.03    0.68 
   5 -21  -1    1.71    0.62 
  -5  21  -1    5.90    1.32 
  -5  21  -1    3.77    1.06 
   5  21   1    3.17    0.90 
   6  21  -1    1.11    0.68 
  -6  21   1    0.40    0.96 
  -6  21   1    3.54    1.53 
   6  21  -1    1.22    0.96 
  -6  21  -1    1.09    1.12 
   6 -21  -1    1.07    0.83 
   6  21   1    0.71    0.70 
   6  21   1    0.98    0.93 
  -7  21   1    2.51    1.17 
   7  21  -1    1.99    0.74 
  -7  21   1    0.88    1.05 
   7  21   1    1.41    0.99 
   7  21   1    0.96    0.71 
  -7  21  -1    3.34    1.07 
   0  22  -1    3.80    0.84 
   0  22   1    3.43    0.88 
  -1  22   1    2.95    1.57 
   1  22  -1    0.15    0.79 
  -1  22   1    1.03    0.90 
   1  22   1    2.33    1.49 
   1  22   1    0.09    0.81 
  -1  22  -1   -0.18    0.85 
  -1  22  -1   -0.95    1.53 
   2  22  -1    7.58    1.05 
  -2  22   1    6.75    1.23 
   2  22   1    8.85    1.06 
  -2  22  -1    6.75    1.19 
  -2  22  -1    4.97    1.58 
   3  22  -1    1.04    0.78 
  -3  22  -1    0.20    0.94 
   3  22   1   -0.33    0.77 
   4  22  -1    0.26    0.78 
  -4  22   1   -0.20    1.07 
   4  22   1    0.47    0.77 
   5  22  -1    1.25    0.79 
  -5  22  -1    3.84    1.19 
   5  22   1    2.51    0.79 
   0  23  -1   -0.91    0.95 
   0  23   1    0.70    1.00 
   1  23  -1    1.85    0.94 
   1  23   1    3.14    0.98 
  -2  23   1    2.90    1.11 
   2  23   1    2.11    0.95 
  -2  23  -1    0.31    1.05 
   0   0  -2  131.52    4.20 
   0   0   2  132.87    4.16 
   1   0  -2    0.43    0.12 
  -1   0  -2    0.46    0.10 
   1   0   2    0.46    0.10 
   1   0   2    0.50    0.07 
  -1   0   2    0.52    0.10 
  -1   0   2    0.43    0.11 
  -2   0  -2   12.10    0.48 
  -2   0  -2   11.87    0.45 
   2   0   2   11.81    0.46 
  -2   0   2   11.86    0.51 
   2   0   2   11.95    0.44 
  -2   0   2   11.79    0.50 
   2   0  -2   12.13    0.51 
  -3   0  -2  109.63    3.69 
  -3   0   2  121.62    3.77 
  -3   0   2  117.07    3.64 
  -3   0  -2  118.47    3.68 
   3   0   2  112.20    3.67 
   3   0  -2  115.21    3.68 
  -4   0  -2  615.32   20.54 
   4   0  -2  645.85   20.47 
  -4   0  -2  726.94   20.55 
  -4   0   2  743.03   20.69 
   4   0   2  628.95   20.52 
  -5   0  -2    1.21    0.17 
   5   0   2    0.81    0.15 
   5   0  -2    1.03    0.12 
  -5   0  -2    0.76    0.16 
  -5   0   2    0.84    0.15 
  -6   0  -2    2.92    0.27 
   6   0   2    1.96    0.26 
   6   0  -2    2.66    0.20 
   7   0  -2   58.10    2.31 
   7   0  -2   59.46    2.02 
  -7   0   2   60.36    2.28 
   7   0   2   57.65    2.19 
   8   0  -2   53.53    2.27 
   8   0  -2   57.73    1.97 
   8   0   2   55.83    2.16 
  -8   0  -2   57.13    2.18 
  -8   0   2   57.11    2.26 
   9   0   2    0.69    0.25 
  -9   0   2    0.46    0.23 
   9   0  -2    0.50    0.15 
   9   0  -2    0.67    0.27 
  -9   0  -2    0.49    0.22 
  10   0   2  105.07    3.78 
  10   0  -2  105.44    3.49 
 -10   0   2  106.02    3.91 
  10   0  -2  100.12    3.89 
 -10   0  -2  105.66    3.80 
  11   0   2    3.88    0.50 
  11   0  -2    4.29    0.36 
  11   0  -2    3.92    0.55 
 -11   0  -2    4.36    0.48 
 -11   0   2    4.24    0.49 
 -12   0  -2    9.71    0.71 
 -12   0   2    8.94    0.73 
  12   0  -2    8.53    0.81 
  12   0   2    9.57    0.74 
  12   0  -2    8.97    0.53 
 -13   0  -2   30.95    1.56 
  13   0  -2   28.78    1.23 
 -13   0   2   30.66    1.65 
  13   0  -2   30.01    1.63 
  13   0   2   31.94    1.55 
 -14   0   2   47.18    2.30 
  14   0   2   48.62    2.17 
  14   0  -2   48.28    1.82 
  14   0  -2   47.18    2.30 
 -14   0  -2   48.78    2.22 
  15   0  -2   29.61    1.73 
 -15   0  -2   30.06    1.64 
 -15   0   2   29.67    1.69 
  15   0   2   31.78    1.63 
  16   0  -2    0.45    0.76 
  16   0   2    1.33    0.65 
 -16   0  -2    0.70    0.43 
 -16   0   2    0.16    0.45 
  17   0  -2    9.44    1.39 
 -17   0   2    7.28    0.80 
 -17   0  -2    5.72    0.71 
  17   0   2    8.44    1.22 
   0  -1   2   -0.12    0.03 
   0   1   2   -0.11    0.04 
   0   1  -2   -0.07    0.04 
   0  -1   2   -0.08    0.04 
   1   1  -2  120.55    3.75 
   1  -1   2  114.09    3.68 
  -1   1   2  124.95    3.71 
  -1   1   2  113.78    3.75 
   1  -1   2  121.78    3.74 
   1  -1  -2  115.20    3.75 
  -1  -1   2  123.86    3.71 
  -1  -1   2  119.49    3.74 
  -1   1  -2  116.81    3.73 
  -1   1  -2  118.43    3.69 
   2  -1   2    4.44    0.24 
  -2   1   2    4.57    0.27 
   2  -1   2    4.32    0.24 
  -2  -1  -2    4.47    0.21 
  -2  -1  -2    4.31    0.21 
  -2   1   2    4.51    0.26 
   2   1  -2    4.38    0.25 
  -2   1  -2    4.34    0.21 
  -2  -1   2    4.52    0.24 
   2  -1  -2    4.16    0.26 
  -2   1  -2    4.33    0.26 
  -2  -1   2    4.82    0.26 
  -2   1  -2    4.36    0.22 
   2   1   2    4.36    0.20 
   3  -1   2  221.96    6.59 
  -3  -1  -2  214.32    6.63 
   3  -1   2  209.27    6.66 
  -3   1   2  210.79    6.64 
  -3   1   2  230.41    6.75 
  -3  -1  -2  202.06    6.62 
   3   1  -2  215.27    6.63 
  -3   1   2  202.57    6.58 
  -3   1  -2  207.65    6.68 
   3   1   2  205.95    6.61 
  -3  -1   2  223.38    6.73 
  -3   1  -2  225.61    6.65 
   3  -1  -2  213.24    6.67 
  -3  -1   2  206.03    6.56 
  -4   1   2    9.11    0.40 
   4  -1   2    8.96    0.47 
  -4   1   2    9.02    0.37 
   4   1  -2    9.59    0.42 
   4  -1   2    9.48    0.37 
  -4  -1  -2    9.34    0.45 
  -4   1   2    8.57    0.55 
  -4  -1   2    9.23    0.57 
   4  -1  -2    9.20    0.44 
  -4   1  -2    9.52    0.45 
   4   1   2    8.49    0.44 
  -4   1  -2    8.85    0.49 
   5   1  -2   51.07    1.70 
  -5   1   2   51.94    1.91 
   5  -1   2   49.60    1.84 
  -5  -1   2   52.29    1.90 
   5  -1  -2   49.08    1.93 
  -5   1  -2   49.07    1.87 
   5   1   2   49.68    1.80 
  -5   1  -2   53.41    1.84 
   5  -1  -2   50.15    1.76 
   6  -1   2   81.61    2.90 
   6   1  -2   84.17    2.72 
  -6  -1  -2   88.02    2.90 
   6   1   2   81.44    2.87 
   6  -1  -2   81.49    3.02 
  -6   1  -2   79.46    2.94 
  -6   1  -2   85.40    2.90 
   6  -1  -2   85.17    2.78 
   7   1  -2   -0.02    0.09 
  -7   1   2   -0.30    0.19 
   7  -1   2    0.01    0.16 
  -7  -1  -2   -0.13    0.24 
   7  -1  -2    0.10    0.11 
  -7  -1   2   -0.01    0.21 
   7   1   2    0.16    0.15 
  -7   1  -2   -0.09    0.20 
   7  -1  -2   -0.04    0.18 
  -7   1  -2    0.05    0.15 
  -8   1   2   22.13    1.12 
   8   1  -2   22.37    1.14 
  -8  -1  -2   21.89    1.06 
   8  -1   2   22.65    1.09 
   8   1  -2   21.41    0.87 
  -8  -1   2   22.39    1.11 
   8  -1  -2   21.98    0.92 
   8  -1  -2   21.34    1.15 
  -8   1  -2   22.31    1.07 
   8   1   2   22.49    1.13 
  -9   1   2    7.33    0.58 
  -9  -1  -2    7.79    0.54 
   9  -1   2    7.47    0.56 
   9   1  -2    7.28    0.58 
   9   1  -2    7.20    0.40 
  -9  -1   2    7.60    0.58 
   9   1   2    7.99    0.56 
   9  -1  -2    6.76    0.58 
  -9   1  -2    6.95    0.53 
   9  -1  -2    7.26    0.43 
  10   1  -2    3.95    0.51 
  10  -1   2    5.89    0.51 
  10   1  -2    4.91    0.35 
 -10   1   2    5.32    0.52 
 -10  -1  -2    4.14    0.45 
  10  -1  -2    4.66    0.53 
  10   1   2    4.98    0.49 
 -10  -1   2    4.98    0.48 
  10  -1  -2    4.70    0.35 
 -10   1  -2    5.87    0.49 
 -11  -1  -2   50.95    2.15 
  11   1  -2   50.07    1.83 
 -11   1   2   49.15    2.23 
  11  -1   2   50.09    2.13 
  11   1  -2   49.63    2.24 
 -11   1  -2   50.18    2.16 
  11  -1  -2   51.84    1.88 
  11  -1  -2   50.96    2.26 
 -11  -1   2   50.88    2.23 
  11   1   2   50.80    2.12 
 -12   1   2   24.38    1.39 
  12  -1   2   24.19    1.30 
  12   1  -2   22.88    1.37 
  12   1  -2   24.39    1.02 
 -12  -1  -2   25.10    1.31 
  12   1   2   26.13    1.31 
  12  -1  -2   24.60    1.06 
  12  -1  -2   24.20    1.38 
 -12  -1   2   24.22    1.37 
 -12   1  -2   24.69    1.32 
 -13   1   2   21.14    1.28 
  13   1  -2   20.05    0.91 
  13   1  -2   20.60    1.29 
  13  -1   2   19.70    1.20 
 -13  -1  -2   20.95    1.20 
 -13   1  -2   19.84    1.17 
  13  -1  -2   21.48    1.30 
 -13  -1   2   21.55    1.29 
  13  -1  -2   19.34    0.94 
  14  -1   2    5.17    0.73 
  14   1  -2    4.31    0.80 
 -14   1   2    4.15    0.55 
 -14  -1  -2    4.54    0.55 
 -14   1  -2    5.19    0.59 
 -14  -1   2    4.41    0.60 
  14  -1  -2    3.76    0.79 
  14   1   2    5.40    0.73 
  15   1  -2    7.40    0.57 
 -15  -1  -2    5.38    0.64 
  15   1  -2    6.33    0.93 
 -15   1   2    6.72    0.70 
  15  -1   2    7.50    0.86 
 -15  -1   2    7.50    0.74 
 -15   1  -2    5.12    0.69 
  15   1   2    7.75    0.84 
  15  -1  -2    6.20    0.93 
  16   1  -2    0.51    0.74 
  16  -1   2    1.72    0.66 
 -16   1   2    0.75    0.44 
 -16  -1  -2    0.02    0.45 
 -16  -1   2    0.82    0.50 
  16  -1  -2    0.68    0.83 
 -16   1  -2    0.45    0.50 
  16   1   2    0.69    0.65 
 -17  -1  -2    2.76    0.54 
 -17   1   2    2.00    0.52 
  17   1  -2    2.89    0.90 
  17  -1   2    3.47    0.87 
 -17  -1   2    1.92    0.51 
 -17   1  -2    3.63    0.69 
  17  -1  -2    3.79    1.02 
  17   1   2    3.36    0.80 
   0   2  -2    0.58    0.10 
   0  -2  -2    0.54    0.08 
   0  -2   2    0.62    0.10 
   1   2  -2  132.44    4.27 
   1  -2   2  135.04    4.27 
  -1   2   2  131.81    4.28 
   1  -2   2  136.54    4.22 
  -1   2  -2  137.92    4.28 
  -1  -2   2  136.93    4.26 
  -1   2  -2  139.14    4.23 
   1  -2  -2  132.02    4.27 
  -1  -2   2  139.88    4.21 
   2   2  -2  810.19   27.39 
  -2   2   2  978.99   27.47 
   2  -2   2  792.56   27.39 
  -2   2  -2  878.21   27.40 
  -2  -2   2 1000.00   27.44 
   2  -2  -2  952.80   27.50 
  -3   2   2   -0.06    0.06 
  -3  -2  -2    0.01    0.07 
  -3   2   2   -0.03    0.11 
   3  -2   2    0.08    0.08 
  -3   2   2    0.08    0.07 
   3  -2   2    0.00    0.06 
   3   2  -2    0.01    0.06 
  -3   2  -2   -0.04    0.09 
  -3  -2   2   -0.05    0.05 
  -3  -2   2   -0.07    0.10 
   3  -2  -2    0.04    0.09 
  -3   2  -2   -0.06    0.06 
  -3   2  -2    0.07    0.10 
   3  -2  -2   -0.02    0.07 
   3   2   2    0.02    0.05 
  -4   2   2   18.66    0.89 
  -4  -2  -2   18.40    0.73 
  -4   2   2   17.06    0.66 
  -4   2   2   17.61    0.71 
   4  -2   2   17.33    0.76 
   4  -2   2   17.86    0.68 
   4   2  -2   17.58    0.68 
  -4  -2   2   18.03    0.87 
   4  -2  -2   17.79    0.74 
  -4   2  -2   17.54    0.73 
  -4   2  -2   16.86    0.79 
   4  -2  -2   16.26    0.82 
   4   2   2   16.16    0.70 
  -5  -2  -2   29.40    1.13 
   5  -2   2   29.22    1.18 
  -5   2   2   28.35    1.03 
  -5   2   2   30.31    1.23 
   5  -2   2   29.88    1.04 
   5   2  -2   28.87    1.04 
  -5   2   2   28.49    1.00 
   5   2   2   28.03    1.12 
   5  -2  -2   29.39    1.27 
  -5   2  -2   29.10    1.17 
  -5   2  -2   28.57    1.22 
   5  -2  -2   27.89    1.10 
  -5  -2   2   28.70    1.20 
   6  -2   2   29.12    1.25 
   6   2  -2   30.62    1.07 
   6  -2   2   30.81    1.07 
  -6  -2  -2   30.65    1.21 
  -6   2   2   27.90    1.41 
  -6   2  -2   28.86    1.29 
   6   2   2   28.42    1.20 
   6  -2  -2   28.77    1.33 
   6  -2  -2   30.25    1.16 
  -6   2  -2   30.29    1.23 
  -7  -2  -2   14.77    0.75 
   7   2  -2   15.57    0.62 
   7  -2   2   15.01    0.61 
  -7   2   2   15.49    0.83 
   7  -2   2   14.50    0.79 
  -7   2  -2   13.43    0.85 
   7   2   2   14.02    0.74 
   7  -2  -2   15.19    0.69 
   7  -2  -2   14.51    0.85 
  -7   2  -2   14.22    0.82 
  -7  -2   2   15.51    0.82 
  -8   2   2  197.24    6.47 
   8   2  -2  192.15    6.04 
   8  -2   2  193.06    6.36 
  -8  -2  -2  198.74    6.33 
   8  -2   2  184.31    5.99 
   8  -2  -2  188.00    6.49 
  -8  -2   2  189.06    6.41 
   8   2   2  192.54    6.30 
  -8   2  -2  196.32    6.36 
   8  -2  -2  200.37    6.17 
  -8   2  -2  182.93    6.43 
  -9  -2  -2   10.12    0.62 
  -9   2   2   10.27    0.69 
   9  -2   2   10.04    0.46 
   9  -2   2    9.42    0.66 
   9   2  -2    8.30    0.68 
   9   2  -2    9.74    0.48 
  -9  -2   2    9.31    0.65 
   9   2   2    9.89    0.64 
  -9   2  -2   10.70    0.66 
   9  -2  -2    9.91    0.53 
   9  -2  -2    8.39    0.66 
  10  -2   2   37.69    1.36 
  10  -2   2   38.44    1.71 
 -10  -2  -2   38.40    1.69 
  10   2  -2   38.17    1.78 
 -10   2   2   37.90    1.78 
  10   2  -2   36.54    1.41 
  10  -2  -2   38.81    1.48 
 -10   2  -2   39.91    1.73 
  10   2   2   39.21    1.67 
  10  -2  -2   37.39    1.78 
 -11  -2  -2    8.47    0.64 
  11   2  -2    7.61    0.72 
  11   2  -2    7.74    0.46 
  11  -2   2    9.12    0.69 
  11  -2   2    8.29    0.44 
 -11   2   2    9.21    0.71 
  11  -2  -2    7.97    0.86 
 -11   2  -2    8.32    0.66 
  11   2   2    8.30    0.66 
 -11  -2   2    7.88    0.65 
  12   2  -2   22.82    1.63 
 -12  -2  -2   23.51    1.27 
  12  -2   2   24.31    0.96 
 -12   2   2   24.91    1.41 
  12   2  -2   23.30    1.00 
  12  -2  -2   23.15    1.36 
 -12  -2   2   24.91    1.37 
  12   2   2   25.05    1.29 
 -12   2  -2   25.77    1.33 
  13   2  -2    3.69    0.53 
  13  -2   2    3.76    0.62 
  13  -2   2    3.40    0.34 
 -13  -2  -2    3.51    0.51 
 -13   2   2    3.61    0.53 
 -13  -2   2    2.72    0.48 
  13   2   2    3.05    0.57 
 -13   2  -2    3.24    0.50 
 -14  -2  -2   21.60    1.25 
  14   2  -2   22.77    1.44 
 -14   2   2   22.98    1.37 
  14  -2   2   23.96    0.95 
  14   2  -2   21.51    1.00 
  14  -2   2   22.15    1.38 
  14   2   2   22.71    1.30 
 -14   2  -2   24.04    1.33 
  14  -2  -2   21.08    1.37 
 -14  -2   2   21.45    1.35 
 -15   2   2    9.59    0.81 
  15   2  -2    9.19    1.26 
 -15  -2  -2    8.85    0.74 
  15   2  -2    6.87    0.60 
  15  -2   2    9.40    1.03 
  15  -2  -2    8.93    1.04 
 -15  -2   2    8.51    0.83 
 -15   2  -2    7.06    0.74 
  15   2   2    9.10    1.59 
  16  -2   2   12.30    1.11 
 -16  -2  -2   11.24    0.88 
  16   2  -2   11.64    0.73 
  16   2  -2   12.87    1.21 
 -16   2   2   10.66    0.91 
 -16   2  -2   10.34    0.87 
 -16  -2   2   10.69    0.88 
  16   2   2   12.54    1.09 
  16  -2  -2   10.35    1.24 
  17  -2   2    2.77    0.84 
 -17   2   2    1.71    0.55 
  17   2  -2    1.36    0.94 
 -17  -2  -2    1.82    0.51 
 -17   2  -2    0.92    0.53 
  17   2   2    2.66    0.82 
  17  -2  -2    3.41    1.15 
 -17  -2   2    0.82    0.47 
   0  -3   2   -0.04    0.07 
   0  -3  -2   -0.11    0.05 
   0   3   2   -0.14    0.06 
   0   3  -2   -0.09    0.05 
   1  -3   2  101.72    3.19 
   1   3  -2  100.66    3.24 
   1  -3   2  102.40    3.25 
  -1   3   2   99.61    3.24 
  -1  -3   2   95.92    3.22 
  -1   3  -2  102.86    3.21 
  -1   3  -2   98.26    3.25 
   1  -3  -2   98.86    3.23 
  -1  -3   2  105.64    3.16 
  -2   3   2  202.43    6.40 
   2  -3   2  207.88    6.40 
  -2   3   2  200.76    6.48 
   2   3  -2  203.57    6.40 
   2  -3   2  207.83    6.42 
  -2   3  -2  212.12    6.43 
  -2  -3   2  209.29    6.39 
  -2  -3   2  205.21    6.37 
  -2   3  -2  208.62    6.43 
   2  -3  -2  196.68    6.46 
  -3  -3  -2   64.17    2.01 
  -3   3   2   61.47    2.09 
  -3   3   2   58.19    2.16 
  -3   3   2   62.29    2.09 
   3  -3   2   60.70    2.05 
   3   3  -2   61.10    2.03 
   3  -3   2   59.00    2.07 
  -3   3   2   61.83    2.04 
  -3  -3   2   61.72    2.08 
  -3  -3   2   60.00    1.97 
  -3   3  -2   62.21    2.05 
   3  -3  -2   59.71    2.16 
  -3   3  -2   60.17    2.01 
  -3   3  -2   58.81    2.12 
  -4  -3  -2   26.94    1.11 
  -4   3   2   27.64    1.11 
   4  -3   2   27.19    1.09 
   4   3  -2   27.89    1.00 
  -4   3   2   27.40    1.06 
   4  -3   2   27.59    1.03 
  -4   3   2   27.74    1.01 
  -4   3  -2   27.46    1.05 
  -4  -3   2   27.01    0.91 
  -4   3  -2   27.77    1.00 
  -4   3  -2   26.46    1.14 
  -4  -3   2   27.90    1.09 
   4  -3  -2   25.88    1.15 
   5   3  -2  148.34    4.74 
   5  -3   2  148.82    4.92 
  -5   3   2  156.16    4.82 
  -5  -3  -2  157.82    4.86 
  -5   3   2  145.77    4.74 
  -5   3   2  154.08    4.98 
   5  -3   2  152.44    4.78 
  -5   3  -2  150.48    5.00 
   5  -3  -2  146.79    5.02 
  -5  -3   2  150.56    4.94 
   5   3   2  147.37    4.82 
   6  -3   2   19.15    0.91 
  -6   3   2   19.01    0.93 
  -6  -3  -2   18.50    0.84 
   6   3  -2   18.58    0.73 
  -6   3   2   18.66    0.73 
  -6   3   2   18.06    0.70 
   6  -3   2   18.70    0.76 
  -6   3  -2   20.24    0.88 
   6   3   2   18.18    0.83 
  -6   3  -2   18.01    0.94 
   6  -3  -2   18.05    0.95 
  -6  -3   2   18.25    0.89 
   7  -3   2   19.28    0.77 
   7   3  -2   18.75    0.74 
  -7   3   2   19.10    0.96 
  -7  -3  -2   18.28    0.87 
   7  -3   2   18.02    0.92 
   7   3   2   18.74    0.87 
  -7   3  -2   17.65    0.96 
   7  -3  -2   18.36    0.99 
   8  -3   2    1.44    0.18 
  -8   3   2    1.71    0.31 
   8   3  -2    1.35    0.17 
   8  -3   2    1.70    0.29 
  -8  -3  -2    1.33    0.27 
  -8   3  -2    1.57    0.32 
   8  -3  -2    1.66    0.33 
   8   3   2    1.60    0.29 
  -8  -3   2    1.31    0.24 
  -8   3  -2    2.11    0.35 
   9  -3   2    7.44    0.58 
  -9  -3  -2    7.53    0.54 
   9   3  -2    7.32    0.40 
   9  -3   2    7.49    0.41 
  -9   3   2    7.00    0.56 
  -9   3  -2    7.95    0.58 
   9  -3  -2    7.01    0.62 
   9   3   2    8.46    0.57 
  -9  -3   2    8.01    0.59 
  -9   3  -2    6.65    0.60 
  10   3  -2   37.06    1.76 
 -10   3   2   36.47    1.76 
  10   3  -2   36.50    1.39 
  10  -3   2   39.09    1.71 
 -10  -3  -2   39.45    1.69 
  10  -3   2   38.40    1.40 
  10  -3  -2   37.00    1.78 
  10   3   2   38.62    1.65 
 -10   3  -2   37.74    1.70 
 -10  -3   2   37.52    1.74 
  11   3  -2    4.77    0.36 
  11  -3   2    5.49    0.57 
 -11   3   2    5.91    0.57 
  11   3  -2    6.45    0.60 
 -11  -3  -2    5.74    0.51 
  11  -3   2    5.59    0.37 
 -11   3  -2    5.09    0.53 
 -11  -3   2    6.01    0.55 
  11   3   2    6.18    0.55 
  11  -3  -2    5.04    0.61 
  12  -3   2    4.51    0.33 
  12  -3   2    4.62    0.58 
  12   3  -2    4.14    0.36 
 -12  -3  -2    4.51    0.48 
 -12   3   2    4.83    0.59 
 -12  -3   2    4.65    0.54 
 -12   3  -2    4.40    0.52 
  12  -3  -2    5.20    0.63 
  12   3   2    3.73    0.56 
 -13   3   2    0.29    0.37 
  13  -3   2    0.57    0.22 
  13   3  -2   -0.12    0.45 
  13  -3   2    0.97    0.43 
 -13  -3  -2    0.89    0.34 
  13   3  -2    0.55    0.24 
  13   3   2   -0.23    0.39 
  13  -3  -2    0.50    0.45 
 -13   3  -2   -0.05    0.37 
 -13  -3   2    0.20    0.30 
 -14   3   2   -0.32    0.39 
  14  -3   2   -0.49    0.52 
  14   3  -2    0.50    0.62 
  14   3  -2   -0.13    0.29 
 -14  -3  -2    0.40    0.35 
  14   3   2    0.86    0.48 
 -14   3  -2    0.95    0.46 
 -14  -3   2    0.92    0.36 
  14  -3  -2    0.02    0.53 
  15   3  -2    3.55    0.50 
 -15   3   2    1.73    0.44 
 -15  -3  -2    4.05    0.55 
  15  -3   2    2.00    0.62 
  15   3  -2    2.05    0.68 
  15  -3   2    3.32    0.43 
  15   3   2    2.61    0.57 
  15  -3  -2    2.70    0.77 
 -15  -3   2    2.65    0.49 
 -15   3  -2    2.74    0.53 
  16   3  -2    0.10    0.42 
 -16   3   2    0.36    0.47 
  16   3  -2    0.80    0.78 
 -16  -3  -2    0.94    0.46 
 -16  -3   2    1.76    0.46 
  16  -3  -2    1.85    0.78 
  16   3   2    2.24    0.69 
  17   3  -2    1.01    0.51 
 -17  -3  -2    1.19    0.44 
  17  -3   2    2.34    0.86 
 -17   3   2    1.78    0.59 
  17   3  -2   -0.12    0.97 
 -17   3  -2    2.02    0.58 
 -17  -3   2   -0.02    0.51 
  17   3   2    3.01    0.86 
   0   4  -2   98.63    3.25 
   0   4  -2   99.60    3.17 
   0   4   2   97.69    3.16 
   0  -4  -2  100.27    3.13 
   1  -4   2   -0.04    0.06 
  -1   4   2   -0.17    0.08 
   1  -4   2   -0.03    0.06 
   1   4  -2   -0.12    0.08 
  -1   4   2   -0.09    0.06 
  -1   4  -2   -0.05    0.08 
  -1   4  -2   -0.15    0.07 
   1   4   2   -0.01    0.06 
   1  -4  -2   -0.17    0.07 
  -1  -4   2   -0.10    0.07 
   2  -4   2  300.99    9.27 
  -2   4   2  291.36    9.35 
   2  -4   2  305.18    9.31 
   2   4  -2  301.51    9.28 
  -2   4   2  298.67    9.28 
  -2   4  -2  303.07    9.32 
  -2  -4   2  310.61    9.23 
  -2   4  -2  296.36    9.30 
  -2  -4   2  293.51    9.24 
   2  -4  -2  293.83    9.32 
   3  -4   2    4.11    0.29 
   3  -4   2    4.06    0.28 
   3   4  -2    3.83    0.26 
  -3   4   2    4.04    0.27 
  -3   4   2    4.08    0.33 
  -3  -4   2    3.85    0.24 
   3  -4  -2    3.91    0.31 
  -3   4  -2    4.02    0.31 
  -3   4  -2    4.00    0.28 
   4   4  -2    1.25    0.14 
  -4   4   2    1.05    0.22 
   4  -4   2    1.23    0.16 
  -4  -4  -2    1.18    0.14 
  -4   4   2    0.84    0.16 
   4  -4   2    1.14    0.18 
  -4   4   2    0.99    0.18 
  -4   4   2    1.29    0.15 
  -4   4  -2    1.27    0.15 
  -4  -4   2    1.36    0.12 
   4  -4  -2    0.97    0.18 
  -4   4  -2    0.98    0.18 
  -4  -4   2    1.37    0.16 
  -4   4  -2    1.44    0.19 
  -5  -4  -2   67.22    2.25 
  -5   4   2   65.75    2.19 
   5   4  -2   64.11    2.17 
  -5   4   2   64.93    2.25 
  -5   4   2   63.47    2.34 
  -5   4   2   60.88    2.43 
   5  -4   2   65.58    2.22 
   5  -4   2   64.71    2.32 
   5  -4  -2   65.55    2.25 
   5  -4  -2   62.81    2.40 
  -5   4  -2   66.96    2.28 
  -5  -4   2   63.90    2.33 
  -5   4  -2   64.98    2.17 
  -5   4  -2   63.85    2.40 
  -6   4   2   40.08    1.41 
  -6   4   2   40.28    1.63 
  -6   4   2   39.58    1.46 
   6  -4   2   39.50    1.60 
   6  -4   2   39.88    1.46 
  -6  -4  -2   38.97    1.54 
   6   4  -2   39.80    1.42 
  -6   4  -2   39.44    1.69 
  -6   4  -2   41.23    1.57 
  -6  -4   2   39.75    1.59 
   6  -4  -2   39.14    1.67 
   7  -4   2    3.54    0.35 
  -7   4   2    3.34    0.24 
   7  -4   2    3.63    0.28 
  -7   4   2    2.98    0.34 
  -7   4   2    3.31    0.22 
  -7  -4  -2    3.22    0.28 
   7   4  -2    3.17    0.23 
  -7  -4   2    3.22    0.32 
   7   4   2    3.17    0.31 
   7  -4  -2    3.68    0.37 
  -7   4  -2    3.67    0.34 
  -7   4  -2    2.78    0.34 
  -8  -4  -2  166.22    5.44 
  -8   4   2  163.01    5.61 
   8  -4   2  160.37    5.25 
   8  -4   2  163.95    5.52 
   8   4  -2  165.22    5.21 
   8   4   2  164.44    5.42 
  -8  -4   2  163.24    5.53 
  -8   4  -2  167.86    5.53 
   8  -4  -2  162.88    5.65 
  -8   4  -2  161.06    5.66 
  -9  -4  -2    1.56    0.27 
  -9   4   2    1.25    0.27 
   9  -4   2    1.81    0.34 
   9  -4   2    1.54    0.20 
   9   4  -2    0.97    0.18 
   9  -4  -2    1.30    0.27 
   9   4   2    1.45    0.31 
  -9   4  -2    1.50    0.32 
  -9  -4   2    0.95    0.24 
  -9   4  -2    0.99    0.27 
  10  -4   2   42.88    1.59 
  10   4  -2   42.87    1.56 
 -10  -4  -2   41.09    1.80 
  10  -4   2   43.75    1.88 
 -10   4   2   42.33    1.95 
  10   4   2   43.04    1.79 
  10  -4  -2   42.01    1.94 
 -10   4  -2   39.56    1.94 
 -10  -4   2   44.11    1.94 
 -10   4  -2   43.58    1.88 
  11  -4   2    4.27    0.61 
  11   4  -2    3.04    0.59 
  11  -4   2    4.34    0.35 
 -11  -4  -2    4.30    0.46 
  11   4  -2    4.42    0.35 
 -11   4   2    4.10    0.54 
  11  -4  -2    4.27    0.59 
 -11   4  -2    4.41    0.51 
 -11  -4   2    4.82    0.48 
  11   4   2    4.58    0.52 
  12   4  -2    2.76    0.87 
  12  -4   2    3.54    0.57 
  12  -4   2    2.19    0.31 
 -12  -4  -2    2.80    0.40 
 -12   4   2    3.35    0.57 
  12   4  -2    2.09    0.32 
  12  -4  -2    3.32    0.48 
 -12  -4   2    2.45    0.44 
 -12   4  -2    3.05    0.48 
  12   4   2    3.09    0.50 
  13  -4   2    4.80    0.86 
  13  -4   2    5.44    0.45 
  13   4  -2    3.95    0.71 
 -13  -4  -2    5.91    0.55 
 -13   4   2    5.38    0.60 
  13   4  -2    4.73    0.42 
 -13   4  -2    5.62    0.61 
  13  -4  -2    4.39    0.76 
 -13  -4   2    4.59    0.54 
  13   4   2    6.04    0.64 
  14  -4   2   15.33    0.77 
  14   4  -2   12.87    0.73 
 -14   4   2   13.00    1.00 
  14  -4   2   15.20    1.05 
 -14  -4  -2   13.42    0.92 
  14  -4  -2   13.30    1.10 
 -14  -4   2   13.30    0.97 
 -14   4  -2   13.59    0.94 
  14   4   2   15.31    1.03 
  15   4  -2    6.49    0.96 
  15  -4   2    9.06    0.93 
 -15   4   2    7.61    0.78 
  15   4  -2    5.65    0.55 
 -15  -4  -2    6.77    0.64 
 -15  -4   2    6.47    0.70 
  15   4   2    7.30    0.90 
  15  -4  -2    7.58    1.03 
 -15   4  -2    5.61    0.70 
 -16   4   2    3.16    0.50 
 -16  -4  -2    3.06    0.53 
  16   4  -2    3.82    0.61 
  16   4  -2    2.79    0.81 
 -16  -4   2    3.13    0.60 
  16  -4  -2    3.16    0.82 
 -16   4  -2    2.57    0.54 
  16   4   2    3.76    0.71 
 -17   4   2    1.08    0.52 
  17   4  -2    2.48    1.01 
  17  -4   2   -0.26    0.91 
 -17  -4  -2    1.22    0.43 
  17   4  -2    1.16    0.54 
 -17   4  -2    0.84    0.58 
   0  -5  -2   -0.06    0.07 
   0   5  -2   -0.08    0.06 
   0   5   2   -0.17    0.07 
   0  -5   2    0.03    0.07 
   0   5   2   -0.03    0.06 
   0   5  -2    0.04    0.07 
  -1   5   2   23.23    0.98 
  -1  -5  -2   26.30    0.85 
   1   5  -2   23.81    0.99 
   1  -5   2   25.90    0.95 
   1  -5   2   24.18    1.00 
  -1   5   2   23.53    0.97 
   1  -5  -2   23.99    0.94 
  -1  -5   2   23.82    0.97 
   1   5   2   26.21    0.88 
  -1   5  -2   25.02    0.97 
   2  -5   2   74.24    2.47 
   2   5  -2   72.29    2.49 
  -2   5   2   72.37    2.55 
  -2   5   2   72.59    2.50 
   2  -5   2   72.82    2.51 
  -2   5  -2   74.00    2.52 
   2  -5  -2   72.22    2.51 
  -2   5  -2   77.30    2.54 
  -2  -5   2   74.28    2.46 
   3  -5   2   56.12    1.97 
   3  -5   2   58.26    1.99 
  -3   5   2   56.85    1.97 
  -3   5   2   53.58    2.06 
   3   5  -2   55.87    1.95 
  -3  -5   2   55.60    1.89 
  -3   5  -2   56.96    1.99 
  -3  -5   2   54.88    1.92 
   3  -5  -2   53.88    2.02 
  -3   5  -2   56.41    2.04 
   4  -5   2    1.99    0.21 
   4   5  -2    2.10    0.20 
   4  -5   2    1.93    0.21 
  -4   5   2    1.55    0.24 
  -4   5   2    1.95    0.19 
   4  -5  -2    1.49    0.24 
  -4   5  -2    2.37    0.21 
  -4  -5   2    2.16    0.20 
   4  -5  -2    1.93    0.22 
  -4   5  -2    1.49    0.23 
  -4  -5   2    2.16    0.16 
  -5   5   2   17.94    0.88 
   5   5  -2   18.53    0.77 
  -5  -5  -2   15.60    0.83 
  -5   5   2   18.75    0.79 
  -5   5   2   18.88    0.84 
  -5   5   2   17.18    0.94 
   5  -5   2   17.36    0.85 
   5  -5   2   18.94    0.82 
  -5   5  -2   18.21    0.81 
  -5  -5   2   18.01    0.83 
  -5   5  -2   19.09    0.79 
   5  -5  -2   17.06    0.90 
   5  -5  -2   18.06    0.83 
  -5   5  -2   18.44    0.94 
  -6   5   2   11.40    0.66 
   6   5  -2   11.19    0.54 
  -6   5   2   11.61    0.74 
   6  -5   2   11.47    0.59 
  -6   5   2   11.25    0.58 
   6  -5   2   11.94    0.65 
  -6  -5  -2   11.15    0.58 
  -6   5   2   11.64    0.56 
  -6  -5   2   11.04    0.61 
  -6   5  -2   10.45    0.69 
  -6   5  -2   11.65    0.53 
  -6   5  -2   11.06    0.61 
   6  -5  -2   10.92    0.67 
   6  -5  -2   11.05    0.59 
  -7   5   2   14.99    0.82 
   7  -5   2   14.31    0.80 
  -7  -5  -2   14.36    0.73 
   7  -5   2   14.77    0.69 
   7   5  -2   13.76    0.64 
  -7   5   2   13.92    0.65 
  -7   5   2   14.65    0.64 
  -7  -5   2   13.36    0.75 
  -7   5  -2   13.52    0.86 
   7  -5  -2   14.72    0.72 
  -7   5  -2   14.48    0.77 
   7  -5  -2   13.84    0.83 
  -8   5   2   48.49    2.06 
  -8  -5  -2   47.72    1.90 
   8  -5   2   50.33    1.82 
  -8   5   2   49.27    1.67 
  -8   5   2   50.03    1.70 
   8   5  -2   49.00    1.75 
   8  -5   2   48.33    1.98 
  -8  -5   2   48.45    1.98 
  -8   5  -2   46.93    2.09 
   8  -5  -2   48.32    2.06 
  -8   5  -2   52.18    2.00 
   8   5   2   48.95    1.89 
   9   5  -2   40.20    1.47 
   9  -5   2   40.09    1.52 
  -9  -5  -2   39.49    1.66 
  -9   5   2   38.63    1.79 
   9  -5   2   40.13    1.73 
  -9   5  -2   39.06    1.84 
   9   5   2   39.89    1.64 
   9  -5  -2   38.95    1.81 
  -9   5  -2   40.99    1.75 
  -9  -5   2   38.11    1.71 
  10   5  -2    0.35    0.16 
  10  -5   2   -0.04    0.16 
 -10  -5  -2    0.51    0.22 
 -10   5   2    0.17    0.29 
  10  -5   2   -0.13    0.26 
 -10  -5   2    0.52    0.25 
  10   5   2    0.06    0.27 
 -10   5  -2    0.66    0.33 
  10  -5  -2   -0.27    0.37 
 -10   5  -2   -0.46    0.33 
  11  -5   2   16.93    0.82 
 -11   5   2   16.95    1.08 
  11  -5   2   16.89    1.01 
 -11  -5  -2   16.44    0.96 
  11   5  -2   17.16    0.78 
 -11  -5   2   17.18    1.02 
  11  -5  -2   16.87    1.07 
 -11   5  -2   17.93    1.03 
  11   5   2   16.69    0.96 
 -12   5   2    3.15    0.56 
  12  -5   2    4.89    0.61 
  12   5  -2    4.65    0.83 
  12  -5   2    3.96    0.37 
  12   5  -2    3.37    0.38 
 -12  -5  -2    4.27    0.46 
 -12   5  -2    3.79    0.51 
 -12  -5   2    3.67    0.49 
  12   5   2    3.91    0.57 
  12  -5  -2    5.53    1.00 
  13   5  -2    1.88    0.31 
  13   5  -2    2.43    0.54 
  13  -5   2    2.95    0.65 
  13  -5   2    2.00    0.38 
 -13   5   2    2.06    0.50 
 -13  -5  -2    1.95    0.35 
 -13   5  -2    1.24    0.43 
  13  -5  -2    2.37    0.56 
  13   5   2    2.38    0.44 
 -13  -5   2    1.76    0.34 
 -14  -5  -2   20.36    1.17 
  14  -5   2   22.07    0.99 
  14  -5   2   21.15    1.27 
  14   5  -2   17.08    0.93 
 -14   5   2   20.51    1.31 
 -14  -5   2   19.85    1.21 
 -14   5  -2   20.07    1.22 
  14  -5  -2   19.68    1.33 
  15  -5   2    7.85    0.95 
  15   5  -2    5.96    0.57 
 -15   5   2    7.19    0.80 
 -15  -5  -2    7.46    0.67 
  15   5  -2    6.54    1.00 
 -15   5  -2    6.00    0.75 
  15  -5  -2    5.67    1.09 
 -15  -5   2    6.58    0.70 
  15   5   2    8.85    0.90 
 -16  -5  -2    0.27    0.42 
  16   5  -2    1.75    0.84 
  16   5  -2   -0.01    0.44 
 -16   5   2    0.44    0.58 
  16  -5   2    1.38    0.72 
 -16   5  -2    0.14    0.50 
  16  -5  -2    1.38    1.17 
 -16  -5   2    0.85    0.46 
  17   5  -2    1.73    0.61 
  17   5  -2   -0.39    1.00 
 -17   5   2    1.20    0.68 
 -17  -5  -2    1.08    0.45 
 -17  -5   2    0.65    0.50 
 -17   5  -2    1.94    0.54 
   0   6   2   14.76    0.65 
   0  -6  -2   15.18    0.60 
   0   6   2   14.39    0.68 
   0   6  -2   15.17    0.65 
   0  -6   2   15.01    0.69 
   0   6  -2   14.14    0.70 
   1   6  -2   22.67    0.97 
   1  -6   2   23.28    0.91 
  -1   6   2   22.29    0.95 
  -1  -6  -2   24.82    0.83 
  -1   6   2   22.36    0.96 
   1  -6   2   23.06    0.97 
  -1  -6   2   22.00    0.94 
   1   6   2   23.42    0.86 
   1  -6  -2   23.21    0.91 
   1   6   2   23.18    0.95 
  -1   6  -2   21.82    0.97 
  -1   6  -2   22.99    0.94 
   2  -6   2   23.57    0.93 
   2   6  -2   22.77    0.97 
  -2   6   2   23.61    0.98 
  -2   6   2   22.69    1.00 
   2  -6   2   22.78    0.98 
  -2  -6   2   23.24    0.94 
   2  -6  -2   22.35    0.95 
  -2   6  -2   22.92    0.99 
   2   6   2   21.87    0.92 
   2   6   2   22.92    0.81 
   3  -6   2    7.80    0.47 
  -3   6   2    8.06    0.47 
  -3   6   2    7.45    0.50 
   3   6  -2    7.37    0.44 
   3  -6   2    7.59    0.43 
  -3   6  -2    7.74    0.47 
  -3  -6   2    7.93    0.41 
   3  -6  -2    7.79    0.48 
  -3   6  -2    7.58    0.49 
   3  -6  -2    8.09    0.48 
   4  -6   2   58.97    2.12 
   4  -6   2   58.41    2.11 
  -4   6   2   58.97    2.10 
  -4   6   2   57.92    2.25 
   4   6  -2   58.43    2.07 
   4  -6  -2   56.89    2.18 
  -4   6  -2   59.60    2.23 
   4  -6  -2   58.16    2.12 
  -4   6  -2   61.36    2.12 
  -4  -6   2   57.06    1.98 
  -5   6   2    2.11    0.24 
  -5   6   2    2.66    0.26 
   5  -6   2    2.59    0.26 
   5   6  -2    2.34    0.22 
  -5   6   2    2.18    0.31 
  -5   6   2    2.14    0.27 
   5  -6   2    2.35    0.25 
  -5   6  -2    2.73    0.25 
  -5  -6   2    1.73    0.21 
   5  -6  -2    2.64    0.30 
   5  -6  -2    2.07    0.25 
  -5   6  -2    2.60    0.24 
  -5   6  -2    2.35    0.28 
   6  -6   2   19.63    0.95 
  -6   6   2   19.07    1.05 
  -6   6   2   18.67    0.94 
  -6   6   2   19.10    0.90 
  -6  -6  -2   19.98    0.88 
   6   6  -2   20.27    0.86 
  -6   6   2   20.53    0.88 
   6  -6   2   21.04    0.92 
  -6   6  -2   20.17    0.86 
   6  -6  -2   18.73    0.90 
  -6   6  -2   19.12    1.02 
   6  -6  -2   19.47    1.00 
  -6   6  -2   20.03    1.06 
  -6  -6   2   19.83    0.92 
   7  -6   2   12.36    0.63 
  -7   6   2   11.82    0.72 
   7   6  -2   11.59    0.58 
  -7   6   2   10.67    0.77 
  -7  -6  -2   11.55    0.63 
  -7   6   2   11.87    0.58 
  -7   6   2   11.66    0.61 
   7  -6   2   11.17    0.68 
   7  -6  -2   11.95    0.65 
  -7  -6   2   10.99    0.66 
   7  -6  -2   11.37    0.72 
  -7   6  -2   12.27    0.69 
  -7   6  -2   12.05    0.56 
  -7   6  -2   11.60    0.78 
  -8  -6  -2    0.87    0.18 
  -8   6   2    0.92    0.27 
   8  -6   2    1.12    0.27 
   8   6  -2    0.95    0.19 
   8  -6   2    1.26    0.22 
  -8   6   2    0.75    0.18 
  -8   6   2    0.75    0.17 
   8  -6  -2    1.05    0.25 
  -8   6  -2    0.73    0.28 
  -8  -6   2    0.78    0.19 
  -8   6  -2    1.32    0.28 
   9  -6   2   -0.11    0.24 
   9  -6   2    0.34    0.16 
  -9  -6  -2    0.17    0.18 
  -9   6   2   -0.01    0.30 
   9   6  -2    0.38    0.15 
   9   6   2    0.25    0.24 
  -9   6  -2    0.22    0.28 
  -9  -6   2    0.08    0.19 
  -9   6  -2   -0.09    0.29 
 -10  -6  -2    0.62    0.22 
  10  -6   2    0.61    0.32 
  10   6  -2    0.56    0.18 
 -10   6   2    0.49    0.33 
  10  -6   2    0.50    0.18 
 -10   6  -2    0.29    0.33 
  10   6   2    0.95    0.18 
  10   6   2    0.31    0.26 
  10  -6  -2    0.79    0.32 
 -10  -6   2    0.20    0.22 
 -10   6  -2    0.60    0.32 
  11  -6   2    1.64    0.29 
  11   6  -2    1.76    0.26 
  11  -6   2    1.62    0.35 
 -11   6   2    1.67    0.36 
 -11  -6  -2    1.53    0.30 
 -11   6  -2    1.87    0.37 
  11   6   2    1.86    0.35 
 -11   6  -2    1.32    0.38 
 -11  -6   2    2.15    0.36 
  11  -6  -2    1.52    0.46 
  12   6  -2    2.10    0.34 
  12  -6   2    1.82    0.30 
 -12   6   2    1.54    0.39 
  12  -6   2    2.96    0.59 
 -12  -6  -2    2.36    0.39 
 -12   6  -2    1.69    0.38 
  12  -6  -2    2.17    0.50 
 -12  -6   2    1.57    0.32 
  12   6   2    1.39    0.37 
  13   6  -2    1.18    0.29 
 -13  -6  -2    1.15    0.31 
  13  -6   2    1.79    0.31 
  13  -6   2    2.23    0.46 
 -13   6   2    0.59    0.43 
  13   6  -2    1.77    0.52 
  13  -6  -2    1.12    0.52 
 -13   6  -2    0.47    0.43 
  13   6   2    1.88    0.44 
 -13  -6   2    1.37    0.31 
  14  -6   2   24.07    1.42 
  14   6  -2   21.52    1.04 
  14  -6   2   22.98    1.11 
 -14   6   2   22.59    1.42 
 -14  -6  -2   22.66    1.28 
  14   6  -2   25.05    2.07 
 -14   6  -2   19.96    1.29 
  14   6   2   21.74    1.49 
  14  -6  -2   22.18    1.42 
 -14  -6   2   23.32    1.35 
  15   6  -2    5.41    1.00 
 -15  -6  -2    5.88    0.60 
  15   6  -2    4.71    0.58 
 -15   6   2    6.23    0.75 
  15  -6  -2    6.15    1.10 
 -15   6  -2    5.82    0.72 
  15   6   2    6.66    0.90 
 -15  -6   2    6.43    0.65 
  16  -6   2    0.40    0.82 
 -16  -6  -2    0.39    0.37 
  16   6  -2    2.18    1.22 
  16   6  -2    1.27    0.46 
 -16   6   2    0.75    0.50 
  16   6   2   -0.01    0.75 
 -16   6  -2    0.20    0.52 
 -16  -6   2   -0.27    0.39 
  17   6  -2    2.18    1.05 
 -17  -6  -2    2.43    0.62 
 -17   6   2    0.33    1.18 
 -17  -6   2    2.51    0.48 
 -17   6  -2    2.23    0.65 
   0   7   2    0.15    0.09 
   0   7   2   -0.07    0.10 
   0  -7  -2    0.03    0.07 
   0   7  -2   -0.05    0.09 
   0  -7   2    0.07    0.10 
   0   7  -2    0.18    0.10 
   1   7  -2   14.20    0.62 
   1  -7   2   13.78    0.70 
   1  -7   2   13.98    0.64 
  -1  -7  -2   14.42    0.56 
  -1   7   2   13.67    0.69 
   1   7  -2   13.14    0.69 
  -1   7   2   13.22    0.68 
   1   7   2   13.13    0.66 
  -1  -7   2   13.69    0.68 
  -1   7  -2   14.36    0.68 
   1   7   2   14.06    0.60 
   1  -7  -2   14.05    0.62 
  -1   7  -2   13.24    0.70 
  -2   7   2   25.18    1.07 
   2  -7   2   25.46    1.07 
   2   7  -2   24.62    1.07 
   2  -7   2   25.20    1.01 
  -2   7   2   23.76    1.09 
  -2   7  -2   24.56    1.08 
   2   7   2   24.17    1.02 
  -2   7  -2   25.11    1.08 
   2   7   2   25.74    0.91 
  -2  -7   2   24.36    1.02 
   2  -7  -2   24.14    1.02 
  -3   7   2   12.95    0.72 
  -3   7   2   13.30    0.68 
   3  -7   2   13.56    0.65 
   3   7  -2   12.82    0.65 
   3  -7   2   13.14    0.68 
  -3  -7   2   12.86    0.62 
   3   7   2   12.44    0.62 
   3  -7  -2   12.51    0.66 
  -3   7  -2   13.12    0.69 
   3   7   2   13.42    0.52 
   3  -7  -2   13.06    0.68 
  -3   7  -2   12.27    0.71 
  -4   7   2    6.07    0.48 
   4  -7   2    6.73    0.42 
  -4   7   2    6.23    0.42 
   4   7  -2    6.21    0.40 
   4  -7   2    6.21    0.43 
   4  -7  -2    6.78    0.44 
  -4  -7   2    6.25    0.35 
   4   7   2    6.55    0.38 
   4  -7  -2    6.38    0.45 
  -4   7  -2    6.37    0.48 
  -4   7  -2    5.62    0.41 
   5   7  -2   24.29    1.04 
  -5   7   2   24.39    1.07 
  -5   7   2   24.48    1.22 
   5  -7   2   24.79    1.08 
   5  -7   2   24.62    1.09 
  -5   7  -2   24.64    1.07 
  -5  -7   2   24.76    1.04 
   5  -7  -2   24.80    1.11 
   5   7   2   24.96    0.98 
   5  -7  -2   23.45    1.14 
   6   7  -2    3.25    0.28 
  -6   7   2    2.66    0.31 
   6  -7   2    3.06    0.29 
   6  -7   2    3.47    0.31 
  -6   7   2    2.66    0.36 
  -6   7   2    2.66    0.28 
  -6   7   2    3.44    0.34 
  -6   7  -2    2.69    0.33 
   6  -7  -2    3.66    0.36 
  -6   7  -2    2.74    0.36 
   6  -7  -2    3.13    0.30 
   6   7   2    3.34    0.24 
  -6   7  -2    3.83    0.30 
  -6  -7   2    3.22    0.29 
   7  -7   2   25.55    1.13 
  -7   7   2   25.38    1.11 
   7   7  -2   25.32    1.07 
  -7   7   2   23.84    1.31 
   7  -7   2   25.42    1.18 
  -7   7   2   24.64    1.07 
  -7  -7  -2   25.88    1.11 
  -7   7   2   24.91    1.22 
   7   7   2   24.45    0.98 
  -7  -7   2   24.19    1.14 
   7  -7  -2   24.85    1.23 
  -7   7  -2   26.26    1.16 
  -7   7  -2   26.75    1.07 
  -7   7  -2   25.54    1.33 
   7  -7  -2   25.34    1.14 
  -8   7   2   15.02    0.72 
  -8   7   2   14.17    0.85 
  -8  -7  -2   13.67    0.74 
   8  -7   2   14.66    0.76 
  -8   7   2   13.97    0.68 
  -8   7   2   13.75    0.92 
   8   7  -2   14.07    0.69 
   8  -7   2   13.90    0.82 
  -8   7  -2   14.01    0.64 
  -8  -7   2   13.35    0.77 
  -8   7  -2   13.63    0.92 
  -8   7  -2   14.27    0.64 
   8  -7  -2   14.58    0.87 
   8  -7  -2   13.75    0.76 
   8   7   2   13.39    0.61 
  -8   7  -2   14.88    0.81 
  -9   7   2    4.70    0.35 
   9   7  -2    3.94    0.35 
   9  -7   2    4.22    0.49 
  -9   7   2    4.92    0.32 
  -9  -7  -2    4.57    0.40 
   9  -7   2    4.97    0.39 
  -9   7   2    4.43    0.50 
  -9   7  -2    3.64    0.55 
   9  -7  -2    5.03    0.53 
  -9   7  -2    5.16    0.49 
  -9  -7   2    4.08    0.40 
   9   7   2    4.94    0.30 
  10  -7   2    0.25    0.30 
 -10  -7  -2    0.49    0.20 
 -10   7   2    0.24    0.36 
  10  -7   2    0.82    0.22 
  10   7  -2    0.39    0.20 
  10  -7  -2    0.51    0.32 
  10   7   2    0.80    0.28 
 -10   7  -2    0.96    0.39 
 -10   7  -2    0.37    0.33 
 -10  -7   2    0.51    0.22 
  10   7   2    0.70    0.17 
  11  -7   2   65.43    2.62 
 -11   7   2   62.33    2.74 
 -11  -7  -2   65.94    2.55 
  11  -7   2   64.49    2.40 
  11   7  -2   66.21    2.33 
 -11   7  -2   60.71    2.80 
  11  -7  -2   63.36    2.73 
 -11   7  -2   63.21    2.65 
  11   7   2   63.03    2.16 
  11   7   2   63.03    2.50 
 -11  -7   2   65.14    2.64 
 -12  -7  -2    2.50    0.37 
 -12   7   2    2.19    0.60 
  12  -7   2    3.24    0.59 
  12  -7   2    2.34    0.38 
  12   7  -2    2.37    0.38 
 -12   7  -2    2.75    0.53 
 -12  -7   2    2.95    0.41 
  12   7   2    2.84    0.54 
 -12   7  -2    1.75    0.47 
  12   7   2    2.63    0.28 
 -13  -7  -2    3.20    0.43 
  13  -7   2    5.05    0.83 
  13   7  -2    3.80    0.45 
 -13   7   2    4.01    0.59 
  13  -7   2    3.63    0.50 
  13   7  -2    3.77    0.78 
 -13   7  -2    3.51    0.58 
  13  -7  -2    4.77    0.80 
  13   7   2    3.35    0.65 
 -13  -7   2    2.74    0.45 
  14  -7   2    3.56    0.80 
 -14   7   2    3.32    0.62 
 -14  -7  -2    3.61    0.46 
  14   7  -2    2.81    0.42 
 -14  -7   2    3.21    0.49 
  14   7   2    3.34    0.58 
  14  -7  -2    4.64    0.93 
 -14   7  -2    3.37    0.61 
 -15  -7  -2    1.36    0.40 
 -15   7   2    1.17    0.50 
  15   7  -2    2.73    0.73 
  15   7  -2    0.48    0.42 
  15  -7   2    1.47    0.67 
 -15   7  -2    1.33    0.59 
  15   7   2    0.18    0.61 
  15  -7  -2    1.28    0.73 
  16   7  -2    7.29    0.77 
 -16   7   2    8.62    0.94 
  16   7  -2    7.72    1.26 
 -16  -7  -2    9.42    0.78 
  16  -7   2   10.85    1.40 
 -16   7  -2    9.46    0.87 
  16   7   2    5.47    1.56 
 -16  -7   2    8.83    0.76 
   0   8  -2  354.32   11.28 
   0   8   2  354.16   11.24 
   0  -8  -2  375.54   11.07 
   0   8   2  361.42   11.16 
   0  -8   2  349.05   11.23 
   0   8  -2  356.79   11.15 
  -1   8   2   49.77    1.88 
   1   8  -2   50.58    1.79 
   1   8  -2   49.73    1.92 
   1  -8   2   50.76    1.80 
   1  -8   2   49.51    1.90 
  -1   8   2   49.78    1.90 
  -1  -8   2   50.90    1.89 
  -1   8  -2   51.15    1.87 
   1  -8  -2   51.27    1.79 
  -1   8  -2   49.21    1.93 
   1   8   2   51.20    1.77 
   1   8   2   50.25    1.88 
   2   8  -2   12.25    0.66 
   2  -8   2   11.87    0.66 
   2  -8   2   11.88    0.60 
  -2   8   2   11.56    0.67 
  -2   8   2   11.11    0.64 
  -2   8  -2   11.48    0.66 
   2  -8  -2   11.41    0.59 
  -2   8  -2   11.81    0.66 
   2   8   2   11.26    0.60 
  -2  -8   2   11.66    0.62 
   2   8   2   13.39    0.55 
   3  -8   2   99.63    3.40 
  -3   8   2   99.14    3.48 
   3   8  -2   99.75    3.38 
  -3   8   2   96.46    3.38 
   3  -8   2   97.35    3.32 
   3  -8  -2   98.47    3.41 
  -3  -8   2   96.29    3.29 
   3   8   2   99.23    3.14 
   3   8   2   97.81    3.31 
  -3   8  -2   98.60    3.46 
  -3   8  -2   96.47    3.40 
   3  -8  -2   97.70    3.36 
   4   8  -2   34.64    1.41 
  -4   8   2   33.61    1.53 
   4  -8   2   34.76    1.44 
   4  -8   2   33.95    1.39 
  -4   8   2   34.81    1.43 
  -4   8  -2   35.27    1.45 
  -4   8  -2   34.94    1.53 
   4  -8  -2   36.09    1.47 
  -4  -8   2   33.76    1.31 
   4   8   2   35.16    1.35 
   4  -8  -2   34.63    1.45 
   5   8  -2   18.70    0.86 
  -5   8   2   17.90    0.88 
   5  -8   2   19.32    0.91 
   5  -8   2   17.83    0.87 
  -5   8   2   17.26    0.99 
   5  -8  -2   17.61    0.90 
  -5   8  -2   18.02    0.99 
   5   8   2   17.51    0.79 
  -5   8  -2   17.83    0.88 
   5  -8  -2   17.22    0.90 
   6  -8   2    0.16    0.19 
   6  -8   2    0.39    0.15 
   6   8  -2    0.17    0.15 
  -6   8   2    0.23    0.26 
  -6   8   2    0.57    0.23 
  -6   8   2    0.20    0.15 
  -6   8  -2    0.21    0.16 
  -6   8  -2    0.32    0.21 
  -6  -8   2    0.29    0.14 
   6  -8  -2    0.51    0.19 
  -6   8  -2    0.58    0.23 
   6  -8  -2    0.20    0.15 
   6   8   2    0.25    0.13 
  -7   8   2    5.03    0.54 
  -7   8   2    5.97    0.46 
   7  -8   2    6.00    0.46 
   7   8  -2    6.72    0.45 
  -7   8   2    6.10    0.50 
   7  -8   2    6.27    0.49 
  -7   8   2    6.00    0.43 
  -7  -8   2    5.39    0.42 
   7   8   2    6.71    0.39 
   7  -8  -2    6.67    0.48 
  -7   8  -2    6.40    0.42 
  -7   8  -2    5.09    0.53 
  -7   8  -2    6.47    0.47 
   7  -8  -2    5.64    0.53 
  -8   8   2   30.86    1.30 
   8  -8   2   30.51    1.40 
   8  -8   2   29.75    1.33 
   8   8  -2   31.51    1.27 
  -8   8   2   30.04    1.45 
  -8   8   2   31.09    1.27 
  -8   8   2   27.56    1.53 
   8   8   2   30.84    1.17 
  -8   8  -2   29.73    1.39 
  -8  -8   2   29.68    1.35 
  -8   8  -2   28.92    1.54 
   8  -8  -2   29.72    1.43 
  -8   8  -2   31.60    1.24 
  -9   8   2   17.73    1.05 
  -9   8   2   17.30    1.12 
  -9  -8  -2   18.37    0.94 
  -9   8   2   19.28    0.84 
   9  -8   2   18.59    0.95 
   9  -8   2   16.83    1.30 
  -9   8   2   19.36    0.88 
   9   8  -2   18.66    0.88 
  -9   8  -2   18.76    0.78 
   9   8   2   18.68    0.79 
  -9   8  -2   18.92    1.16 
  -9   8  -2   19.88    0.78 
   9  -8  -2   17.16    1.05 
  -9  -8   2   16.55    0.95 
  -9   8  -2   17.48    1.01 
  10  -8   2    5.88    0.55 
 -10  -8  -2    5.71    0.45 
  10  -8   2    5.06    0.45 
 -10   8   2    5.09    0.55 
 -10   8   2    4.77    0.34 
 -10   8   2    5.74    0.38 
  10   8  -2    5.07    0.41 
  10   8   2    5.55    0.36 
 -10   8  -2    4.31    0.61 
 -10  -8   2    4.92    0.46 
 -10   8  -2    5.14    0.52 
  10   8   2    5.99    0.50 
  11  -8   2    5.45    0.50 
 -11  -8  -2    5.23    0.46 
  11   8  -2    6.71    0.47 
  11  -8   2    5.12    0.72 
 -11   8   2    5.64    0.62 
 -11   8  -2    4.98    0.70 
  11   8   2    6.14    0.39 
  11   8   2    5.31    0.56 
 -11  -8   2    6.42    0.56 
 -11   8  -2    6.37    0.62 
  12  -8   2    8.86    0.80 
  12   8  -2    8.83    0.62 
 -12   8   2    9.28    0.76 
 -12  -8  -2    9.87    0.68 
  12  -8   2    9.47    0.67 
  12  -8  -2    9.81    0.86 
 -12  -8   2    9.24    0.72 
  12   8   2    9.52    0.74 
 -12   8  -2    8.23    0.91 
 -12   8  -2   10.64    0.80 
  12   8   2    9.84    0.54 
 -13  -8  -2   15.61    0.97 
  13  -8   2   14.27    1.06 
 -13   8   2   15.90    1.12 
  13   8  -2   15.94    0.86 
  13  -8   2   16.46    0.93 
  13  -8  -2   17.58    1.14 
 -13  -8   2   15.59    1.01 
  13   8   2   16.08    1.01 
 -13   8  -2   15.28    1.02 
  13   8   2   15.23    0.73 
  14  -8   2   32.47    1.71 
 -14   8   2   31.33    1.79 
  14   8  -2   28.03    2.34 
  14   8  -2   32.96    1.44 
 -14  -8  -2   33.11    1.63 
  14  -8   2   35.50    1.53 
  14  -8  -2   33.32    1.78 
  14   8   2   32.05    1.28 
 -14  -8   2   32.36    1.70 
  14   8   2   33.51    1.63 
 -14   8  -2   31.87    1.69 
 -15  -8  -2   23.66    1.34 
  15   8  -2   22.42    1.17 
  15  -8   2   24.25    1.49 
  15   8  -2   22.86    1.52 
 -15   8   2   21.58    1.46 
  15  -8   2   25.50    1.24 
  15  -8  -2   23.64    1.58 
 -15   8  -2   22.98    1.42 
 -15  -8   2   23.33    1.37 
  15   8   2   23.72    1.39 
  16   8  -2    2.23    1.02 
 -16   8   2    2.11    0.61 
  16   8  -2    2.31    0.56 
 -16  -8  -2    3.04    0.51 
 -16   8  -2    2.29    0.62 
  16   8   2    2.31    0.89 
   0   9  -2   -0.09    0.11 
   0   9  -2    0.01    0.13 
   0  -9   2    0.02    0.12 
   0   9   2    0.02    0.12 
   0   9   2    0.14    0.13 
   0  -9  -2    0.03    0.09 
   1   9  -2   26.03    1.06 
   1   9  -2   25.61    1.17 
   1  -9   2   25.75    1.16 
  -1   9   2   25.28    1.15 
  -1   9   2   25.05    1.13 
   1  -9   2   27.37    1.07 
  -1  -9   2   24.63    1.12 
   1   9   2   25.63    1.14 
   1   9   2   26.48    1.05 
   1  -9  -2   26.49    1.04 
  -1   9  -2   26.74    1.13 
  -1   9  -2   25.39    1.18 
   2  -9   2   31.66    1.26 
   2   9  -2   30.65    1.34 
   2   9  -2   32.27    1.22 
  -2   9   2   31.56    1.37 
   2  -9   2   30.39    1.34 
  -2  -9   2   30.53    1.29 
   2   9   2   30.52    1.30 
   2   9   2   32.58    1.18 
  -2   9  -2   31.18    1.35 
   2  -9  -2   32.30    1.26 
  -2   9  -2   31.85    1.37 
  -3   9   2   15.01    0.79 
   3  -9   2   15.17    0.74 
   3   9  -2   15.24    0.79 
  -3   9   2   15.73    0.86 
   3  -9   2   14.95    0.80 
   3   9   2   14.16    0.74 
  -3   9  -2   14.24    0.79 
   3  -9  -2   14.93    0.75 
  -3   9  -2   14.74    0.83 
  -3  -9   2   15.16    0.74 
   3   9   2   15.37    0.63 
   4   9  -2   27.73    1.22 
   4  -9   2   27.08    1.23 
  -4   9   2   26.50    1.22 
  -4   9   2   28.28    1.34 
   4  -9   2   28.36    1.20 
   4   9   2   27.78    1.00 
  -4  -9   2   28.32    1.13 
   4  -9  -2   26.79    1.24 
   4  -9  -2   26.97    1.21 
   4   9   2   26.89    1.15 
  -4   9  -2   26.54    1.30 
  -4   9  -2   28.48    1.26 
   5  -9   2    4.56    0.41 
   5   9  -2    4.36    0.37 
  -5   9   2    4.12    0.36 
   5  -9   2    4.31    0.37 
  -5   9   2    4.58    0.44 
   5  -9  -2    4.40    0.40 
  -5   9  -2    4.19    0.38 
  -5   9  -2    4.27    0.44 
   5   9   2    4.79    0.35 
   5  -9  -2    4.88    0.41 
   6  -9   2   21.17    1.03 
   6   9  -2   20.68    0.98 
   6  -9   2   21.83    1.02 
  -6   9   2   19.98    1.00 
  -6   9   2   20.77    1.16 
   6  -9  -2   20.53    1.05 
   6   9   2   21.95    0.94 
  -6   9  -2   20.58    1.00 
  -6   9  -2   20.28    1.16 
   6  -9  -2   20.88    1.06 
   7  -9   2    4.53    0.41 
  -7   9   2    3.25    0.48 
  -7   9   2    4.92    0.45 
  -7   9   2    3.64    0.42 
   7   9  -2    4.56    0.38 
  -7   9   2    4.41    0.39 
   7  -9   2    4.43    0.43 
  -7   9  -2    4.04    0.50 
   7  -9  -2    4.38    0.40 
  -7   9  -2    4.44    0.37 
  -7   9  -2    3.60    0.41 
   7  -9  -2    4.88    0.46 
   7   9   2    4.39    0.35 
  -7  -9   2    4.18    0.35 
   8   9  -2    6.08    0.45 
   8  -9   2    6.04    0.57 
  -8   9   2    5.62    0.61 
   8  -9   2    6.06    0.50 
  -8   9   2    5.51    0.44 
  -8   9   2    6.22    0.55 
  -8   9   2    6.51    0.51 
  -8   9  -2    5.69    0.61 
   8   9   2    6.45    0.42 
  -8   9  -2    4.68    0.51 
   8  -9  -2    6.38    0.61 
  -8  -9   2    6.42    0.46 
  -8   9  -2    6.10    0.46 
  -9   9   2    5.34    0.66 
   9  -9   2    5.60    0.55 
  -9   9   2    6.13    0.43 
   9  -9   2    6.01    0.50 
  -9   9   2    6.53    0.56 
   9   9  -2    5.19    0.44 
  -9   9   2    5.66    0.48 
  -9   9  -2    6.84    0.65 
  -9   9  -2    5.55    0.42 
   9  -9  -2    5.49    0.60 
   9   9   2    5.94    0.40 
  -9  -9   2    6.53    0.48 
  -9   9  -2    6.02    0.42 
  -9   9  -2    5.89    0.55 
 -10   9   2   30.40    1.25 
  10  -9   2   29.43    1.37 
 -10   9   2   29.00    1.55 
 -10   9   2   32.63    1.24 
  10   9  -2   29.27    1.30 
  10  -9   2   31.82    1.49 
 -10  -9   2   31.08    1.45 
 -10   9  -2   26.68    1.88 
 -10   9  -2   29.71    1.50 
  10   9   2   29.86    1.21 
 -11   9   2    1.82    0.44 
  11   9  -2    1.95    0.38 
  11  -9   2    2.17    0.41 
 -11   9  -2    3.68    0.69 
  11   9   2    2.57    0.34 
 -11   9  -2    1.81    0.41 
 -11  -9   2    2.92    0.36 
  12   9  -2    0.85    0.32 
 -12  -9  -2   -0.24    0.26 
 -12   9   2    0.46    0.41 
  12  -9   2    0.24    0.31 
  12  -9   2   -0.05    0.47 
  12   9   2    0.28    0.26 
 -12   9  -2    0.01    0.42 
  12  -9  -2    0.34    0.54 
 -12  -9   2    0.59    0.29 
 -12   9  -2    0.05    0.63 
  12   9   2    0.32    0.41 
 -13  -9  -2    5.01    0.51 
 -13   9   2    3.78    0.67 
  13   9  -2    3.60    0.55 
  13   9   2    4.97    0.70 
 -13  -9   2    4.24    0.50 
 -13   9  -2    4.26    0.93 
  13   9   2    3.92    0.46 
  13  -9  -2    4.00    0.89 
 -13   9  -2    4.22    0.65 
 -14   9   2    0.24    0.52 
 -14  -9  -2    0.27    0.30 
  14  -9   2    1.38    0.48 
  14   9  -2    0.87    0.83 
  14   9  -2    0.66    0.44 
  14  -9   2    0.15    0.67 
  14   9   2    0.63    0.34 
 -14  -9   2    0.50    0.33 
 -14   9  -2    0.95    0.53 
  14   9   2    1.33    0.59 
  14  -9  -2    1.46    0.70 
  15  -9   2    0.57    0.84 
 -15   9   2    0.91    0.57 
  15   9  -2    1.07    0.80 
  15  -9   2    1.21    0.48 
  15   9  -2    0.81    0.53 
 -15  -9  -2    0.18    0.36 
  15   9   2    1.41    0.67 
 -15  -9   2    0.41    0.37 
 -15   9  -2    0.89    0.57 
 -16   9   2    1.47    0.58 
  16   9  -2    2.91    1.12 
 -16  -9  -2    1.50    0.46 
  16   9  -2    1.24    0.62 
  16   9   2    2.68    0.55 
 -16  -9   2    1.43    0.45 
  16   9   2    1.59    0.83 
 -16   9  -2    1.99    0.64 
   0  10  -2   12.50    0.67 
   0 -10   2   12.69    0.71 
   0  10   2   12.07    0.70 
   0  10  -2   11.28    0.70 
   0 -10  -2   13.52    0.60 
   0  10   2   12.13    0.65 
  -1  10   2  139.50    4.77 
   1  10  -2  144.41    4.63 
  -1  10   2  141.08    4.74 
   1 -10   2  135.50    4.75 
   1  10  -2  139.40    4.80 
  -1 -10   2  136.90    4.72 
   1  10   2  139.98    4.75 
  -1  10  -2  143.18    4.73 
   1 -10  -2  147.20    4.60 
  -1  10  -2  138.22    4.81 
   1  10   2  146.08    4.62 
   2  10  -2   34.84    1.35 
   2 -10   2   33.53    1.48 
   2 -10   2   34.40    1.38 
  -2  10   2   35.65    1.50 
   2  10  -2   34.78    1.50 
  -2  10   2   34.07    1.49 
   2 -10  -2   35.32    1.38 
   2  10   2   34.94    1.46 
  -2  10  -2   35.13    1.52 
   2  10   2   35.86    1.32 
  -2  10  -2   36.01    1.50 
  -2 -10   2   33.48    1.42 
   3 -10   2    2.94    0.31 
  -3  10   2    2.52    0.32 
   3 -10   2    3.27    0.28 
   3  10  -2    2.91    0.26 
   3  10  -2    2.98    0.31 
  -3  10   2    3.00    0.38 
   3  10   2    2.33    0.31 
   3 -10  -2    2.59    0.31 
   3  10   2    2.90    0.25 
  -3 -10   2    2.70    0.27 
  -3  10  -2    2.14    0.32 
  -3  10  -2    2.81    0.33 
  -4  10   2    0.56    0.22 
   4 -10   2    0.49    0.16 
   4  10  -2    0.20    0.18 
   4 -10   2    0.42    0.17 
  -4  10   2    0.65    0.19 
  -4  10  -2    0.20    0.21 
  -4  10  -2    0.19    0.19 
   4 -10  -2    0.14    0.17 
  -4 -10   2    0.73    0.16 
   4  10   2    0.54    0.14 
   4  10   2    0.48    0.17 
   4 -10  -2    0.37    0.17 
   5  10  -2    0.82    0.21 
   5 -10   2    0.53    0.21 
  -5  10   2    0.24    0.24 
  -5  10   2    0.36    0.19 
   5 -10   2    0.81    0.20 
  -5  10  -2    0.81    0.21 
   5 -10  -2    0.33    0.17 
   5 -10  -2    0.68    0.23 
   5  10   2    0.62    0.19 
  -5  10  -2    0.66    0.26 
  -6  10   2    4.74    0.43 
   6 -10   2    4.80    0.44 
  -6  10   2    4.91    0.53 
   6  10  -2    4.42    0.40 
   6 -10   2    5.04    0.43 
   6  10   2    5.09    0.41 
  -6  10  -2    4.17    0.39 
   6 -10  -2    5.54    0.48 
   6 -10  -2    4.72    0.44 
  -6  10  -2    5.15    0.51 
  -7  10   2    5.93    0.62 
  -7  10   2    6.08    0.50 
   7 -10   2    5.78    0.48 
  -7  10   2    5.63    0.47 
   7  10  -2    6.43    0.47 
   7 -10   2    5.88    0.49 
  -7  10  -2    5.74    0.46 
   7 -10  -2    5.90    0.50 
  -7  10  -2    4.93    0.56 
  -7  10  -2    6.79    0.51 
   7 -10  -2    6.40    0.54 
   7  10   2    6.05    0.44 
  -8  10   2   23.63    1.39 
   8  10  -2   24.21    1.14 
   8 -10   2   23.84    1.18 
  -8  10   2   22.70    1.10 
  -8  10   2   23.88    1.25 
   8 -10   2   23.06    1.16 
  -8  10   2   24.12    1.16 
  -8  10  -2   23.76    1.17 
  -8  10  -2   24.65    1.11 
   8  10   2   24.44    1.06 
   8 -10  -2   23.11    1.22 
  -8  10  -2   23.04    1.35 
   9  10  -2   19.90    1.00 
  -9  10   2   19.28    1.16 
   9 -10   2   20.05    1.19 
  -9  10   2   20.70    0.98 
   9 -10   2   19.42    1.04 
  -9  10   2   22.09    1.04 
  -9  10   2   19.87    1.26 
  -9 -10   2   18.75    1.02 
  -9  10  -2   22.58    1.00 
   9  10   2   20.85    0.94 
  -9  10  -2   20.90    1.30 
  -9  10  -2   19.21    1.08 
  -9  10  -2   20.65    1.02 
  10 -10   2   14.86    1.10 
  10  10  -2   15.19    0.87 
 -10  10   2   16.79    0.85 
  10 -10   2   15.84    0.94 
 -10  10   2   16.95    1.04 
 -10  10   2   14.83    1.09 
 -10  10   2   16.65    0.81 
 -10  10  -2   15.92    1.13 
 -10 -10   2   16.03    0.92 
 -10  10  -2   15.03    0.74 
 -10  10  -2   16.72    0.75 
  10  10   2   16.57    0.80 
 -10  10  -2   16.28    0.99 
  11 -10   2    4.45    0.63 
 -11  10   2    5.99    0.62 
 -11  10   2    4.86    0.41 
 -11  10   2    5.25    0.46 
  11  10  -2    4.96    0.50 
  11 -10   2    5.22    0.54 
  11  10   2    4.74    0.46 
 -11  10  -2    4.73    0.60 
  11  10   2    5.46    0.59 
 -11 -10   2    4.49    0.45 
 -11  10  -2    4.49    0.78 
 -12  10   2   19.92    1.33 
  12 -10   2   22.03    1.13 
  12 -10   2   20.70    1.20 
  12  10  -2   22.28    1.08 
  12  10   2   21.27    0.97 
 -12 -10   2   20.07    1.15 
 -12  10  -2   19.31    1.37 
  12  10   2   20.17    1.13 
 -12  10  -2   20.44    1.21 
  12 -10  -2   19.64    1.28 
  13 -10   2    4.22    0.73 
  13  10  -2    2.96    0.58 
 -13  10   2    4.82    0.65 
  13 -10   2    3.25    0.61 
  13  10   2    2.17    0.48 
 -13  10  -2    4.36    0.97 
 -13  10  -2    2.79    0.61 
 -13 -10   2    3.24    0.44 
  13 -10  -2    3.74    0.67 
  13  10   2    3.23    0.54 
  14  10  -2   11.58    0.82 
  14 -10   2    9.60    1.05 
 -14  10   2    9.25    0.92 
  14  10   2   10.47    0.69 
  14 -10  -2   12.10    1.20 
  14  10   2    8.99    0.97 
 -14 -10   2   10.13    0.78 
 -14  10  -2    9.96    0.89 
 -15  10   2    3.24    0.62 
  15 -10   2    3.30    0.58 
  15  10   2    3.24    0.72 
 -15 -10   2    2.67    0.49 
  15  10   2    2.53    0.48 
 -15  10  -2    4.71    0.78 
   0  11  -2   -0.08    0.16 
   0  11   2    0.23    0.18 
   0 -11  -2    0.02    0.12 
   0 -11   2    0.18    0.15 
   0  11   2   -0.24    0.17 
   0  11  -2   -0.03    0.19 
   1 -11   2   15.33    0.84 
  -1  11   2   15.30    0.83 
  -1  11   2   15.04    0.81 
   1  11  -2   15.05    0.84 
   1  11  -2   14.14    0.73 
   1  11   2   14.61    0.74 
  -1  11  -2   14.58    0.80 
   1 -11  -2   14.99    0.70 
   1  11   2   15.17    0.83 
  -1  11  -2   14.81    0.84 
  -1 -11   2   14.77    0.80 
  -2  11   2    7.06    0.53 
   2 -11   2    7.19    0.53 
   2 -11   2    8.26    0.49 
   2  11  -2    7.89    0.47 
   2  11  -2    7.87    0.56 
  -2  11   2    7.04    0.54 
  -2  11  -2    7.75    0.57 
   2  11   2    7.60    0.46 
  -2 -11   2    7.67    0.51 
   2  11   2    7.07    0.52 
  -2  11  -2    7.24    0.55 
   2 -11  -2    8.26    0.47 
   3  11  -2   17.30    0.93 
  -3  11   2   17.20    0.96 
  -3  11   2   16.82    0.93 
   3 -11   2   17.66    0.94 
   3 -11   2   17.70    0.84 
   3  11  -2   17.42    0.79 
  -3  11  -2   15.69    0.90 
   3 -11  -2   18.31    0.86 
   3  11   2   17.31    0.88 
  -3  11  -2   16.55    0.93 
   3  11   2   17.07    0.75 
  -3 -11   2   17.20    0.85 
   4 -11   2    9.17    0.63 
  -4  11   2    9.64    0.70 
  -4  11   2    8.63    0.60 
   4 -11   2   10.66    0.59 
   4  11  -2    9.89    0.64 
   4  11   2    9.06    0.59 
   4  11   2    9.69    0.49 
  -4  11  -2    9.31    0.65 
   4 -11  -2    9.31    0.59 
  -4 -11   2    9.87    0.56 
  -4  11  -2    8.86    0.65 
  -5  11   2   32.72    1.47 
   5 -11   2   33.69    1.41 
   5 -11   2   31.04    1.46 
   5  11  -2   33.26    1.45 
  -5  11   2   30.87    1.57 
   5  11   2   33.00    1.20 
   5 -11  -2   32.07    1.41 
  -5  11  -2   30.98    1.57 
   5  11   2   32.24    1.39 
  -5  11  -2   32.75    1.48 
   6  11  -2    0.62    0.23 
   6 -11   2    0.96    0.22 
  -6  11   2    0.66    0.32 
   6 -11   2    0.68    0.24 
  -6  11  -2    0.80    0.25 
  -6  11  -2    0.76    0.31 
   6 -11  -2    0.60    0.26 
   6  11   2    0.76    0.22 
   7 -11   2   28.98    1.35 
   7 -11   2   27.55    1.35 
  -7  11   2   26.41    1.51 
  -7  11   2   27.66    1.40 
  -7  11   2   29.40    1.34 
   7  11  -2   28.43    1.32 
  -7  11  -2   29.16    1.35 
  -7  11  -2   29.82    1.36 
   7  11   2   29.91    1.27 
  -7  11  -2   28.97    1.54 
  -8  11   2    2.03    0.32 
  -8  11   2    2.22    0.44 
   8 -11   2    2.19    0.38 
  -8  11   2    2.75    0.44 
  -8  11   2    2.02    0.37 
   8  11  -2    2.12    0.39 
  -8  11  -2    3.33    0.44 
  -8  11  -2    2.05    0.48 
   8  11   2    2.62    0.36 
  -8  11  -2    2.64    0.42 
   8 -11  -2    2.24    0.48 
  -9  11   2    0.30    0.28 
   9  11  -2    0.27    0.28 
  -9  11   2    0.79    0.37 
  -9  11   2    0.92    0.38 
   9 -11   2    0.48    0.28 
  -9  11   2    0.18    0.55 
  -9  11  -2    1.05    0.36 
  -9  11  -2    0.12    0.47 
  -9  11  -2    0.34    0.30 
   9  11   2    0.63    0.26 
 -10  11   2    0.78    0.31 
  10  11  -2    0.57    0.32 
 -10  11   2    0.78    0.38 
 -10  11   2    0.68    0.48 
 -10  11   2    0.94    0.40 
  10  11   2    0.48    0.29 
 -10  11  -2    0.18    0.41 
 -10  11  -2    0.65    0.33 
 -10  11  -2    1.31    0.56 
 -10  11  -2    0.11    0.31 
  11 -11   2    0.48    0.47 
 -11  11   2    0.49    0.32 
 -11  11   2    0.80    0.46 
  11  11  -2    0.52    0.35 
 -11  11   2    0.26    0.38 
  11 -11   2    0.51    0.50 
 -11  11  -2    0.79    0.42 
  11  11   2    0.25    0.31 
 -11  11  -2    0.51    0.57 
  12 -11   2    0.08    0.51 
 -12  11   2    0.04    0.47 
  12  11  -2    0.65    0.42 
  12 -11   2    0.64    0.39 
 -12 -11   2    0.56    0.29 
  12  11   2    0.43    0.35 
 -12  11  -2    0.16    0.73 
 -12  11  -2    0.34    0.50 
  12 -11  -2    1.21    0.57 
  12  11   2    0.39    0.46 
 -13  11   2    1.78    0.56 
  13 -11   2    3.96    0.68 
  13 -11   2    3.45    0.67 
 -13  11  -2    3.51    0.68 
 -13 -11   2    2.41    0.41 
  13  11   2    4.06    0.77 
  13  11   2    2.33    0.44 
 -13  11  -2    1.30    0.76 
 -14  11   2   -0.45    0.53 
  14 -11   2    0.80    0.81 
  14 -11   2    0.72    0.51 
  14  11  -2    1.01    0.54 
  14  11   2    1.54    0.45 
 -14  11  -2    0.40    0.57 
 -14 -11   2    0.14    0.33 
  14  11   2    1.25    0.67 
 -15  11   2    3.44    0.76 
  15 -11   2    3.76    0.67 
  15  11  -2    6.13    1.31 
  15  11   2    4.48    0.82 
 -15  11  -2    3.39    0.64 
  15  11   2    2.46    0.54 
 -15 -11   2    3.87    0.63 
   0 -12  -2    0.40    0.14 
   0  12  -2    0.35    0.22 
   0  12   2    0.23    0.29 
   0  12   2    0.47    0.20 
   0 -12   2    0.09    0.20 
   1  12  -2   31.76    1.49 
   1  12  -2   32.88    1.36 
  -1  12   2   32.79    1.45 
  -1  12   2   32.52    1.48 
   1 -12   2   33.01    1.48 
   1 -12  -2   33.16    1.30 
   1  12   2   33.11    1.37 
  -1 -12   2   32.40    1.44 
  -1  12  -2   32.56    1.45 
  -1  12  -2   32.54    1.51 
   1  12   2   33.37    1.48 
   2 -12   2   10.47    0.58 
  -2  12   2    9.30    0.65 
  -2  12   2    8.91    0.64 
   2 -12   2   10.34    0.68 
   2  12  -2   10.30    0.68 
   2  12  -2    9.58    0.56 
  -2  12  -2    9.40    0.66 
   2  12   2    9.43    0.55 
   2 -12  -2   10.14    0.56 
  -2 -12   2    9.38    0.61 
  -2  12  -2   10.27    0.68 
   2  12   2    9.69    0.64 
   3 -12   2    0.49    0.19 
   3 -12   2    0.46    0.18 
   3  12  -2    0.54    0.23 
  -3  12   2    0.29    0.26 
  -3  12   2    0.50    0.22 
   3 -12  -2    0.36    0.19 
  -3  12  -2    0.00    0.24 
   3  12   2    0.59    0.17 
   3  12   2    0.53    0.21 
   4  12  -2    2.95    0.41 
   4 -12   2    3.10    0.34 
  -4  12   2    2.77    0.38 
   4 -12   2    3.44    0.39 
  -4  12   2    2.80    0.46 
  -4 -12   2    3.08    0.32 
   4 -12  -2    3.61    0.36 
   4  12   2    2.87    0.37 
  -4  12  -2    2.38    0.37 
  -4  12  -2    2.11    0.40 
   4  12   2    2.54    0.27 
   5 -12   2    0.18    0.21 
   5  12  -2    0.07    0.24 
   5 -12   2    0.34    0.22 
  -5  12   2   -0.08    0.31 
   5  12   2   -0.22    0.24 
  -5  12  -2   -0.38    0.34 
   5  12   2    0.03    0.17 
   5 -12  -2    0.07    0.24 
  -5  12  -2    0.04    0.26 
   6  12  -2   13.77    0.83 
   6 -12   2   14.29    0.88 
  -6  12   2   14.05    0.85 
   6 -12   2   13.63    0.82 
  -6  12   2   14.02    0.96 
   6  12   2   14.11    0.79 
  -6  12  -2   12.73    0.93 
   6  12   2   15.11    0.65 
  -6  12  -2   14.42    0.87 
   6 -12  -2   14.08    0.89 
  -7  12   2    4.91    0.65 
   7 -12   2    4.72    0.50 
   7  12  -2    5.63    0.50 
   7 -12   2    5.99    0.61 
  -7  12   2    5.68    0.52 
  -7  12  -2    5.31    0.62 
   7 -12  -2    6.03    0.55 
   7  12   2    6.09    0.49 
   7  12   2    5.28    0.40 
  -7  12  -2    5.49    0.52 
   8  12  -2    4.26    0.49 
  -8  12   2    5.06    0.53 
  -8  12   2    4.26    0.54 
   8 -12   2    4.69    0.49 
  -8  12   2    3.98    0.47 
  -8  12   2    3.97    0.68 
   8 -12  -2    4.53    0.58 
  -8  12  -2    4.69    0.50 
  -8  12  -2    5.52    0.53 
   8  12   2    5.29    0.48 
   9  12  -2   -0.16    0.32 
   9 -12   2   -0.16    0.29 
  -9  12   2    0.23    0.48 
  -9  12   2    0.15    0.41 
  -9  12   2   -0.18    0.32 
  -9  12   2    0.29    0.38 
  -9  12  -2   -0.01    0.52 
  -9  12  -2    0.32    0.39 
  -9  12  -2    0.57    0.36 
   9  12   2    0.45    0.31 
  10  12  -2    1.08    0.35 
 -10  12   2    0.43    0.46 
 -10  12   2    1.34    0.44 
  10 -12   2    1.10    0.36 
 -10  12   2    1.52    0.35 
 -10  12  -2    0.89    0.37 
 -10  12  -2    1.30    0.39 
 -10  12  -2    0.71    0.60 
  10  12   2    0.69    0.33 
 -10  12  -2    1.36    0.44 
  11 -12   2    0.44    0.39 
 -11  12   2    0.57    0.37 
  11  12  -2    0.57    0.40 
  11 -12   2    0.56    0.50 
 -11  12   2    1.03    0.48 
 -11  12   2    0.03    0.43 
 -11  12  -2   -0.13    0.35 
 -11  12  -2    0.25    0.37 
 -11  12  -2    0.24    0.47 
 -11  12  -2    0.51    0.63 
  11 -12  -2   -0.30    0.52 
  11  12   2    0.47    0.34 
  12 -12   2    6.32    0.89 
 -12  12   2    5.14    0.72 
  12  12  -2    4.91    0.68 
 -12  12   2    4.96    0.59 
 -12  12   2    5.83    0.53 
  12 -12   2    5.94    0.74 
  12  12   2    5.59    0.61 
 -12  12  -2    4.98    0.70 
  12  12   2    6.06    0.75 
 -12  12  -2    6.40    1.10 
  12 -12  -2    5.56    0.93 
  13  12  -2    1.16    0.54 
  13 -12   2    1.74    0.52 
 -13  12   2    0.69    0.60 
  13 -12   2    1.12    0.74 
 -13  12  -2    0.03    0.57 
  13  12   2    0.81    0.45 
  13  12   2    0.75    0.59 
 -13  12  -2   -0.12    0.83 
  13 -12  -2    0.35    0.77 
  14 -12   2    1.18    0.55 
  14  12  -2   -0.90    0.77 
 -14  12   2    0.01    0.59 
  14  12   2    1.39    0.51 
 -14  12  -2    1.43    0.97 
 -14  12  -2    0.78    0.63 
  14  12   2    0.43    0.68 
  15  12  -2    1.72    0.76 
  15  12  -2    3.55    1.04 
  15 -12   2    0.18    0.70 
 -15  12  -2    1.67    0.70 
  15  12   2    1.50    0.97 
   0  13  -2   -0.07    0.24 
   0  13   2    0.21    0.23 
   0  13  -2   -0.16    0.21 
   0  13   2    0.17    0.23 
   0 -13   2    0.51    0.20 
   1  13  -2    1.07    0.23 
  -1  13   2    0.59    0.25 
   1  13  -2    0.92    0.25 
  -1  13   2    0.36    0.24 
   1 -13   2    0.31    0.21 
  -1  13  -2    0.72    0.25 
  -1 -13   2    0.83    0.21 
   1  13   2    0.96    0.23 
  -1  13  -2    0.46    0.28 
   1  13   2    0.31    0.24 
   1 -13  -2    0.63    0.17 
   2  13  -2   17.83    0.91 
  -2  13   2   19.22    1.05 
   2  13  -2   18.31    1.03 
  -2  13   2   18.42    1.04 
   2 -13   2   20.35    0.92 
   2 -13   2   18.71    1.03 
   2 -13  -2   19.41    0.89 
  -2 -13   2   19.73    0.98 
   2  13   2   19.33    0.90 
  -2  13  -2   18.64    1.05 
   2  13   2   19.12    1.02 
  -2  13  -2   19.15    1.05 
  -3  13   2    3.25    0.44 
   3 -13   2    4.00    0.35 
   3 -13   2    4.00    0.42 
  -3  13   2    3.89    0.48 
   3  13  -2    3.98    0.43 
   3  13  -2    3.74    0.39 
  -3  13  -2    2.71    0.41 
   3  13   2    3.79    0.41 
   3  13   2    3.29    0.33 
  -3 -13   2    3.84    0.37 
  -3  13  -2    2.84    0.45 
   3 -13  -2    4.01    0.38 
  -4  13   2    0.48    0.27 
   4 -13   2    0.73    0.21 
  -4  13   2    0.04    0.32 
   4 -13   2    0.42    0.21 
   4  13  -2   -0.01    0.26 
   4  13   2    0.27    0.19 
  -4  13  -2    0.02    0.29 
   4 -13  -2    0.60    0.25 
  -4  13  -2    0.23    0.29 
   4  13   2    0.22    0.27 
   5 -13   2   29.42    1.45 
   5  13  -2   29.20    1.43 
  -5  13   2   29.49    1.54 
   5 -13   2   31.21    1.39 
  -5  13   2   29.63    1.45 
   5  13  -2   31.43    1.26 
  -5  13  -2   29.55    1.54 
  -5  13  -2   29.83    1.46 
   5 -13  -2   31.33    1.36 
   5  13   2   29.66    1.19 
   5  13   2   30.48    1.38 
   6  13  -2   40.83    1.78 
  -6  13   2   39.46    1.95 
   6 -13   2   39.15    1.80 
   6 -13   2   40.36    1.71 
  -6  13   2   40.81    1.79 
   6  13   2   39.56    1.71 
  -6  13  -2   39.77    1.96 
   6 -13  -2   40.71    1.73 
  -6  13  -2   40.32    1.79 
   6  13   2   40.30    1.49 
   7  13  -2   23.00    1.15 
  -7  13   2   20.96    1.28 
  -7  13   2   21.92    1.15 
   7 -13   2   18.79    1.29 
   7  13   2   22.46    1.11 
   7  13   2   23.83    0.92 
  -7  13  -2   17.66    1.78 
   7 -13  -2   20.10    1.12 
  -7  13  -2   22.67    1.16 
  -8  13   2   16.86    1.19 
  -8  13   2   16.31    0.96 
  -8  13   2   15.93    0.99 
   8  13  -2   16.18    0.96 
   8 -13   2   16.82    1.02 
  -8  13  -2   15.96    1.18 
   8  13   2   15.77    0.91 
  -8  13  -2   17.20    0.96 
   8  13   2   16.41    0.75 
  -8  13  -2   15.92    0.95 
   9  13  -2    4.18    0.58 
  -9  13   2    6.16    0.81 
   9 -13   2    5.76    0.59 
  -9  13   2    5.64    0.69 
  -9  13   2    4.87    0.57 
  -9  13   2    6.13    0.64 
  -9  13  -2    6.88    0.62 
   9  13   2    5.94    0.58 
   9 -13  -2    4.95    0.67 
  -9  13  -2    5.51    0.80 
  -9  13  -2    6.19    0.60 
 -10  13   2    1.07    0.59 
 -10  13   2    0.96    0.49 
  10  13  -2    0.85    0.41 
 -10  13   2    0.12    0.52 
 -10  13   2    0.88    0.40 
 -10  13  -2    0.91    0.51 
  10  13   2    0.35    0.37 
 -10  13  -2    1.43    0.69 
  10 -13  -2    0.68    0.49 
 -10  13  -2    1.36    0.43 
 -10  13  -2    0.17    0.44 
 -11  13   2    1.38    0.44 
 -11  13   2    1.08    0.50 
  11 -13   2   -0.06    0.42 
  11 -13   2    0.35    0.53 
 -11  13   2   -0.20    0.51 
 -11  13   2   -0.34    0.66 
  11  13  -2   -0.20    0.44 
 -11  13  -2    0.56    0.69 
 -11  13  -2    0.22    0.46 
 -11  13  -2   -0.12    0.42 
 -11  13  -2    0.61    0.52 
  11 -13  -2    0.38    0.60 
  11  13   2   -0.26    0.42 
 -12  13   2    6.44    0.82 
  12 -13   2    7.74    0.97 
  12 -13   2    8.21    0.82 
 -12  13   2    6.24    0.74 
 -12  13   2    7.45    0.68 
 -12  13  -2    8.22    1.19 
 -12  13  -2    6.63    0.80 
  12  13   2    7.87    0.72 
  12 -13  -2    7.32    1.03 
 -13  13   2    2.38    0.63 
  13 -13   2    3.77    0.79 
  13  13   2    2.95    0.55 
 -13  13  -2    2.51    0.62 
 -13  13  -2    1.74    0.90 
  14  13  -2    2.39    0.69 
  14 -13   2    1.71    0.63 
 -14  13   2    2.24    0.62 
  14  13   2    2.65    0.75 
 -14  13  -2    2.82    1.03 
 -14  13  -2    0.87    0.62 
   0  14  -2   65.00    2.49 
   0 -14   2   62.74    2.53 
   0  14   2   64.92    2.59 
   0  14  -2   64.98    2.63 
   0  14   2   64.20    2.48 
   1  14  -2    0.44    0.24 
   1  14  -2    0.83    0.28 
  -1  14   2    0.51    0.26 
  -1  14   2    0.77    0.32 
   1 -14   2    1.07    0.25 
   1  14   2    0.95    0.28 
  -1  14  -2    0.33    0.29 
  -1 -14   2    1.12    0.24 
   1  14   2    1.02    0.25 
   1 -14  -2    1.04    0.20 
  -1  14  -2    0.66    0.28 
   2  14  -2    1.07    0.26 
   2 -14   2    1.18    0.25 
  -2  14   2    0.40    0.32 
  -2  14   2    0.45    0.29 
   2  14  -2    0.77    0.29 
   2  14   2    0.83    0.31 
  -2 -14   2    1.50    0.30 
  -2  14  -2    0.76    0.29 
   2  14   2    1.01    0.26 
  -2  14  -2    0.94    0.30 
   2 -14  -2    0.75    0.21 
   3 -14   2    8.46    0.63 
   3  14  -2    8.42    0.67 
  -3  14   2    8.49    0.69 
  -3  14   2    8.01    0.65 
   3  14  -2    8.32    0.56 
   3 -14   2    8.27    0.66 
  -3 -14   2    9.01    0.61 
   3  14   2    7.94    0.64 
  -3  14  -2    7.45    0.64 
   3  14   2    8.68    0.53 
  -3  14  -2    8.23    0.67 
   3 -14  -2    9.17    0.58 
  -4  14   2    6.18    0.57 
   4  14  -2    5.49    0.56 
   4  14  -2    6.51    0.49 
  -4  14   2    6.53    0.63 
   4 -14   2    5.84    0.49 
   4 -14   2    6.58    0.56 
  -4  14  -2    5.01    0.54 
   4  14   2    6.69    0.46 
   4  14   2    6.10    0.55 
   4 -14  -2    6.41    0.50 
  -4  14  -2    5.92    0.65 
   5 -14   2    2.47    0.39 
   5  14  -2    2.56    0.37 
  -5  14   2    1.53    0.40 
   5  14  -2    2.47    0.41 
  -5  14   2    2.23    0.39 
   5  14   2    2.37    0.47 
  -5  14  -2    2.25    0.48 
   5  14   2    1.72    0.32 
  -5  14  -2    1.78    0.42 
   6 -14   2   15.49    0.99 
   6  14  -2   17.59    0.84 
  -6  14   2   16.91    0.98 
   6 -14   2   16.62    0.92 
   6  14  -2   16.96    0.99 
  -6  14   2   16.70    1.08 
   6  14   2   16.91    0.78 
  -6  14  -2   13.22    1.53 
   6 -14  -2   16.18    0.92 
  -6  14  -2   16.19    0.98 
   6  14   2   15.58    0.91 
  -7  14   2    3.50    0.60 
   7 -14   2    4.18    0.50 
  -7  14   2    3.67    0.53 
   7  14  -2    4.28    0.55 
   7  14   2    3.51    0.41 
  -7  14  -2    3.39    0.68 
   7  14   2    2.76    0.52 
  -7  14  -2    3.09    0.56 
   8  14  -2   -0.99    0.62 
  -8  14   2   -0.38    0.39 
  -8  14   2    0.19    0.43 
  -8  14   2    0.48    0.55 
   8 -14   2    0.54    0.34 
  -8  14  -2    0.23    0.40 
   8  14   2   -0.06    0.36 
  -8  14  -2   -0.06    0.43 
  -8  14  -2   -0.10    0.52 
  -9  14   2    0.55    0.47 
   9  14  -2   -0.48    0.53 
  -9  14   2    0.32    0.42 
   9 -14   2    0.44    0.40 
  -9  14   2    0.03    0.65 
   9 -14  -2   -0.12    0.49 
   9  14   2    0.92    0.30 
  -9  14  -2    0.21    0.44 
  -9  14  -2   -0.47    0.64 
  -9  14  -2    0.77    0.47 
   9  14   2   -0.35    0.39 
  10 -14   2    8.24    0.75 
 -10  14   2    8.31    0.83 
  10  14  -2    7.78    0.79 
 -10  14   2    8.11    0.95 
 -10  14   2    8.62    0.71 
 -10  14   2    6.78    1.03 
  10 -14   2    9.45    0.80 
  10  14   2    7.47    0.70 
  10 -14  -2    7.32    0.85 
 -10  14  -2    8.09    0.75 
 -10  14  -2    8.17    1.05 
 -10  14  -2   10.23    0.77 
 -11  14   2    7.83    0.74 
  11 -14   2    8.60    0.91 
 -11  14   2    8.97    1.12 
 -11  14   2    7.97    0.87 
  11  14  -2    7.51    0.76 
 -11  14   2    5.80    0.78 
  11 -14   2    8.70    0.78 
  11 -14  -2    5.85    0.94 
 -11  14  -2    7.45    0.76 
 -11  14  -2    6.41    1.15 
 -11  14  -2    6.99    0.75 
 -11  14  -2    7.38    0.80 
  12 -14   2    1.07    0.69 
  12 -14   2    0.95    0.56 
 -12  14   2    0.34    0.60 
 -12  14   2    0.62    0.60 
  12  14  -2    0.90    0.59 
 -12  14   2    0.61    0.54 
  12 -14  -2    1.08    0.77 
 -12  14  -2   -0.06    0.90 
 -12  14  -2    0.54    0.50 
 -12  14  -2   -0.25    0.49 
 -12  14  -2   -0.36    0.59 
 -13  14   2    3.43    0.63 
  13 -14   2    3.99    0.63 
  13  14   2    4.75    0.84 
 -13  14  -2    3.78    0.71 
  13  14   2    5.30    1.07 
  14 -14   2   -0.66    0.70 
 -14  14  -2    3.17    1.16 
  14  14   2   -0.57    1.07 
  14  14   2    1.41    0.72 
 -14  14  -2   -0.12    0.68 
   0  15  -2   -0.50    0.31 
   0 -15   2   -0.06    0.26 
   0  15   2   -0.29    0.30 
   1 -15   2    0.15    0.27 
   1  15  -2    0.19    0.30 
  -1  15   2   -0.35    0.32 
   1  15  -2    0.34    0.33 
   1  15   2   -0.17    0.31 
  -1 -15   2    0.68    0.27 
   1  15   2    0.37    0.29 
   1 -15  -2    0.51    0.22 
  -1  15  -2    0.62    0.32 
  -1  15  -2    0.20    0.39 
  -2  15   2    0.05    0.36 
  -2  15   2   -0.36    0.32 
   2  15  -2   -0.24    0.26 
   2  15  -2   -0.13    0.33 
  -2  15  -2   -0.04    0.35 
   2  15   2   -0.36    0.28 
   2 -15  -2    0.03    0.23 
  -2  15  -2   -0.21    0.35 
   2  15   2    0.11    0.32 
   3  15  -2    0.82    0.33 
   3 -15   2    0.97    0.25 
   3 -15   2    0.82    0.28 
   3  15  -2    0.72    0.25 
  -3  15   2    0.67    0.34 
  -3  15   2    0.96    0.40 
  -3  15  -2    0.22    0.35 
   3 -15  -2    1.25    0.26 
  -3 -15   2    0.98    0.26 
  -3  15  -2    1.46    0.37 
   3  15   2    1.06    0.28 
   3  15   2    0.54    0.39 
   4 -15   2   19.28    0.95 
  -4  15   2   18.92    1.14 
   4  15  -2   19.25    1.08 
   4 -15   2   17.84    1.04 
   4  15  -2   16.23    0.90 
  -4  15   2   17.86    1.07 
  -4  15  -2   16.88    1.04 
  -4  15  -2   17.28    1.11 
   4  15   2   16.91    1.24 
   4  15   2   17.82    0.87 
   4 -15  -2   18.55    0.93 
   5  15  -2    8.93    0.61 
   5 -15   2    9.54    0.75 
  -5  15   2    8.75    0.69 
  -5  15   2    8.03    0.75 
   5 -15   2    7.59    0.60 
   5  15  -2    7.83    0.71 
   5  15   2    8.90    0.57 
  -5  15  -2    8.80    0.71 
   5  15   2    7.59    0.72 
   5 -15  -2    8.95    0.63 
  -6  15   2   26.83    1.36 
   6  15  -2   26.40    1.37 
  -6  15   2   22.23    1.91 
   6  15  -2   26.40    1.15 
   6 -15   2   26.69    1.36 
  -6  15  -2   26.36    1.37 
   6  15   2   25.17    1.09 
  -6  15  -2   26.87    1.50 
   6  15   2   22.95    1.34 
   6 -15  -2   28.46    1.35 
  -7  15   2    1.11    0.42 
   7 -15   2    1.05    0.37 
   7  15  -2    1.09    0.34 
  -7  15   2    0.41    0.59 
   7 -15   2    0.92    0.35 
   7  15  -2    0.29    0.42 
  -7  15  -2    1.53    0.48 
   7  15   2    1.27    0.27 
  -7  15  -2    0.79    0.58 
   8 -15   2   10.50    0.76 
  -8  15   2    9.59    0.76 
  -8  15   2    8.95    0.78 
   8 -15   2    8.80    0.73 
  -8  15   2    8.50    0.97 
   8  15  -2    9.94    0.82 
  -8  15  -2    9.33    0.73 
  -8  15  -2    7.03    0.94 
   8  15   2    9.24    0.73 
   8 -15  -2   10.58    0.80 
   8  15   2    8.44    0.60 
  -9  15   2   11.40    0.87 
   9 -15   2   11.97    0.86 
  -9  15   2    9.50    1.12 
  -9  15   2   10.40    1.13 
   9 -15   2   11.60    0.88 
   9  15  -2    9.35    0.85 
  -9  15   2    8.42    0.77 
  -9  15  -2   12.47    0.90 
   9 -15  -2   10.81    1.01 
   9  15   2   11.92    0.67 
  -9  15  -2   11.05    1.07 
  -9  15  -2   10.44    0.82 
   9  15   2    9.67    0.79 
  10 -15   2    9.54    0.89 
 -10  15   2    7.38    1.19 
 -10  15   2    8.22    1.02 
 -10  15   2   10.05    0.86 
 -10  15   2    8.31    1.18 
  10 -15   2    9.68    0.84 
 -10  15  -2   10.53    0.88 
  10  15   2   10.82    0.66 
 -10  15  -2   10.34    1.15 
  10  15   2    8.35    0.77 
 -10  15  -2   10.19    0.82 
  10 -15  -2    8.72    0.95 
 -11  15   2    4.99    0.83 
 -11  15   2    7.11    1.00 
 -11  15   2    4.33    0.86 
  11 -15   2    4.84    0.94 
  11 -15   2    6.64    0.80 
  11  15  -2    4.06    0.80 
 -11  15   2    5.35    0.79 
 -11  15  -2    4.49    0.91 
  11  15   2    6.55    0.63 
  11  15   2    6.51    0.79 
 -11  15  -2    6.09    0.80 
 -11  15  -2    5.82    1.26 
 -11  15  -2    6.76    0.86 
  11 -15  -2    4.51    0.72 
  12 -15   2    1.30    0.59 
  12  15  -2    2.73    0.87 
 -12  15   2    2.03    0.65 
 -12  15   2    2.20    0.60 
 -12  15   2    3.21    0.73 
 -12  15  -2    2.90    0.65 
 -12  15  -2    1.70    0.59 
 -12  15  -2    2.50    0.66 
 -12  15  -2    2.55    1.03 
  13 -15   2    0.39    0.65 
 -13  15   2   -0.67    0.87 
 -13  15   2   -0.59    0.65 
  13  15  -2    1.99    0.80 
 -13  15  -2    0.66    1.30 
  13  15   2    0.27    0.71 
 -13  15  -2    1.78    0.66 
   0  16   2   35.34    1.63 
   0 -16   2   35.75    1.67 
   0  16  -2   35.61    1.63 
   1  16  -2   16.06    0.87 
  -1  16   2   13.79    0.90 
   1 -16   2   15.36    0.91 
  -1  16  -2   14.85    0.92 
   1  16   2   14.41    0.93 
   1  16   2   14.60    0.85 
   2  16  -2    1.43    0.39 
  -2  16   2    0.84    0.39 
   2 -16  -2    0.71    0.26 
  -2  16  -2    0.18    0.40 
  -3  16   2   26.52    1.55 
   3  16  -2   23.79    1.31 
   3  16  -2   22.13    1.12 
  -3  16   2   24.50    1.32 
   3 -16   2   23.24    1.27 
  -3  16  -2   24.61    1.33 
   3  16   2   24.22    1.14 
  -3  16  -2   24.85    1.32 
   3 -16  -2   24.68    1.12 
   3  16   2   22.87    1.25 
   4  16  -2   13.32    0.76 
   4  16  -2   12.63    0.89 
   4 -16   2   14.66    0.90 
   4 -16   2   14.57    0.94 
  -4  16   2   13.93    1.00 
   4  16   2   12.04    0.85 
   4  16   2   13.79    0.75 
  -4  16  -2   12.40    0.99 
  -4  16  -2   11.93    0.90 
   4 -16  -2   15.40    0.81 
   5 -16   2   11.41    0.83 
   5  16  -2    9.18    0.82 
   5  16  -2   10.01    0.71 
   5  16   2   10.80    0.63 
  -5  16  -2   10.01    0.87 
  -5  16  -2   11.31    0.83 
   5 -16  -2   11.45    0.74 
   5  16   2    9.77    0.77 
   6 -16   2   16.59    0.97 
   6 -16   2   18.54    1.09 
   6  16  -2   19.81    0.94 
  -6  16   2   17.37    1.16 
   6  16  -2   16.65    1.08 
  -6  16  -2   15.53    1.06 
   6  16   2   14.70    0.97 
   6  16   2   17.75    0.86 
  -6  16  -2   19.67    1.22 
   7 -16   2    0.68    0.41 
  -7  16   2    0.05    0.64 
   7  16  -2    0.83    0.36 
   7  16  -2    0.33    0.48 
   7 -16   2    0.66    0.38 
  -7  16  -2   -0.14    0.51 
   7  16   2   -0.09    0.45 
   7 -16  -2    0.83    0.45 
  -7  16  -2    0.64    0.63 
   8  16  -2    6.87    0.91 
  -8  16   2    7.51    1.01 
   8  16  -2    7.98    0.65 
  -8  16   2    8.61    0.93 
   8 -16   2    7.95    0.79 
   8 -16   2    8.00    0.74 
  -8  16   2    7.18    0.73 
  -8  16  -2    6.21    0.98 
  -8  16  -2    8.89    0.85 
   8 -16  -2    8.91    0.85 
   8  16   2    5.79    0.73 
   8  16   2    5.98    0.56 
  -8  16  -2    7.22    0.70 
   9 -16   2    4.09    0.77 
   9  16  -2    3.14    0.91 
  -9  16   2    3.73    0.68 
  -9  16   2    5.10    0.71 
   9 -16   2    4.14    0.71 
   9  16  -2    4.15    0.65 
  -9  16   2    3.31    0.83 
  -9  16   2    3.03    0.56 
  -9  16  -2    4.40    0.66 
   9  16   2    3.52    0.43 
  -9  16  -2    3.70    0.79 
   9 -16  -2    4.81    0.84 
  -9  16  -2    4.92    0.91 
   9  16   2    3.42    0.71 
 -10  16   2   12.56    0.99 
  10 -16   2   13.16    1.03 
 -10  16   2   16.32    1.10 
  10 -16   2   13.44    1.02 
 -10  16   2   13.55    1.19 
  10  16   2   12.28    1.31 
 -10  16  -2   14.42    1.01 
  10 -16  -2   15.06    1.11 
 -10  16  -2   15.60    1.82 
 -10  16  -2   14.94    1.34 
  11  16  -2   -0.07    0.66 
 -11  16   2    1.10    0.83 
 -11  16   2    0.96    0.73 
  11 -16   2    0.99    0.57 
 -11  16   2    1.28    1.02 
 -11  16   2    0.86    0.62 
 -11  16  -2    0.17    0.59 
  11  16   2    0.61    0.71 
 -11  16  -2    2.20    0.78 
 -11  16  -2    1.64    1.03 
 -12  16   2    6.36    1.19 
 -12  16   2    6.97    1.09 
  12  16  -2    5.03    1.08 
 -12  16   2    6.21    0.87 
  12 -16   2    5.58    0.95 
  12  16   2    6.22    0.99 
 -12  16  -2    5.02    0.79 
 -12  16  -2    4.70    1.27 
 -12  16  -2    7.41    0.88 
   0  17   2   -0.63    0.39 
   0 -17   2    0.14    0.32 
   0  17  -2   -0.54    0.37 
  -1  17   2    3.41    0.58 
   1  17  -2    2.14    0.48 
  -1  17  -2    2.34    0.45 
  -1 -17   2    2.95    0.49 
   1  17   2    2.60    0.52 
   2  17  -2    5.58    0.58 
  -2  17   2    7.40    0.72 
   2  17  -2    6.54    0.97 
  -2  17  -2    5.66    1.14 
   2  17   2    6.03    0.58 
   2 -17  -2    6.82    0.52 
  -3  17   2    4.43    0.88 
   3  17  -2    4.85    0.53 
   3  17  -2    6.17    0.88 
  -3  17   2    6.08    0.72 
   3 -17  -2    5.57    0.51 
  -3  17  -2    5.08    0.66 
   3  17   2    4.66    0.53 
  -4  17   2   27.52    2.12 
   4  17  -2   30.40    1.63 
  -4  17   2   30.33    1.70 
   4 -17   2   32.10    1.57 
   4  17  -2   29.59    1.37 
   4  17   2   32.59    2.17 
   4  17   2   30.89    1.35 
   4 -17  -2   31.90    1.43 
  -4  17  -2   30.42    1.62 
   5  17  -2    2.24    0.48 
  -5  17   2    2.48    0.58 
   5 -17   2    2.40    0.53 
  -5  17  -2    1.03    0.59 
   5  17   2    2.11    0.47 
   5  17   2    2.70    0.84 
   6 -17   2    1.38    0.41 
  -6  17   2    2.52    0.69 
   6 -17   2    1.82    0.42 
   6  17  -2    1.52    0.40 
   6  17  -2    2.09    0.52 
  -6  17  -2    1.41    0.60 
   6  17   2    2.32    0.47 
   6  17   2    1.66    0.55 
   6 -17  -2    2.17    0.46 
   7  17  -2    2.01    0.55 
   7 -17   2    1.96    0.46 
  -7  17   2    2.06    0.55 
  -7  17   2    2.48    0.78 
   7  17   2    2.99    0.55 
   7  17   2    1.11    0.52 
   8  17  -2    5.30    0.90 
  -8  17   2    6.49    0.85 
  -8  17   2    8.49    1.12 
   8 -17   2    8.24    0.77 
   8 -17   2    8.19    0.82 
   8 -17  -2    6.73    0.84 
   8  17   2    6.12    0.62 
   8  17   2    6.72    0.84 
  -8  17  -2    8.48    1.13 
  -9  17   2    7.93    1.22 
   9  17  -2    8.73    0.79 
  -9  17   2    9.93    0.83 
   9 -17   2    9.11    0.89 
  -9  17   2    9.59    1.11 
   9  17  -2    6.26    0.93 
  -9  17   2    6.31    1.09 
   9 -17   2    8.70    0.86 
  -9  17  -2    6.37    1.23 
   9 -17  -2    8.80    0.97 
  -9  17  -2    7.73    0.80 
  10 -17   2   13.40    1.06 
 -10  17   2   11.85    1.30 
 -10  17   2   14.06    1.06 
 -10  17   2   12.35    1.43 
  10  17  -2   12.15    1.38 
 -10  17  -2   13.98    1.21 
  10  17   2   12.38    1.10 
  10 -17  -2   16.46    1.26 
 -10  17  -2   12.87    1.01 
 -10  17  -2   15.17    1.46 
 -11  17   2    1.89    0.67 
  11 -17   2    1.11    0.64 
 -11  17   2    1.71    0.97 
  11  17  -2    1.46    0.77 
 -11  17   2    0.28    1.13 
 -11  17   2    1.64    1.01 
 -11  17  -2    0.85    1.12 
  11  17   2    1.47    0.75 
 -11  17  -2    0.70    0.88 
 -11  17  -2    2.63    0.84 
 -11  17  -2    0.40    0.67 
 -12  17   2    2.67    0.96 
 -12  17   2   -1.45    1.02 
  12  17  -2    0.94    0.92 
  12 -17   2    0.18    0.75 
  12  17   2    2.21    1.14 
 -12  17  -2    0.54    0.94 
   0 -18   2    3.88    0.57 
   0  18   2    4.30    0.65 
   1  18  -2   -0.52    0.41 
   1 -18   2    0.12    0.36 
  -1  18   2    0.50    0.49 
   1  18  -2   -0.43    0.57 
   1  18   2   -0.73    0.49 
  -1 -18   2    0.25    0.37 
  -1  18  -2    0.12    0.44 
   1  18   2   -0.13    0.43 
   2 -18   2    0.74    0.37 
   2  18  -2    0.04    0.41 
  -2  18   2   -0.07    0.50 
   2  18  -2    0.41    0.55 
   2  18   2    0.18    0.42 
  -2  18  -2   -0.07    0.52 
  -2  18  -2    0.66    0.54 
   2  18   2   -0.19    0.49 
  -3  18   2    3.97    0.74 
   3  18  -2    4.26    0.58 
  -3  18   2    4.23    0.91 
   3  18  -2    3.77    0.78 
   3 -18   2    5.41    0.64 
   3 -18  -2    3.60    0.61 
   3  18   2    4.02    0.60 
  -3  18  -2    3.30    0.73 
  -3  18  -2    3.69    0.57 
   3  18   2    4.96    0.59 
   4  18  -2   30.42    1.40 
  -4  18   2   31.44    1.66 
   4 -18   2   31.81    1.59 
   4  18  -2   32.47    1.65 
  -4  18   2   29.94    1.59 
   4  18   2   32.19    1.68 
  -4  18  -2   29.91    1.62 
   4  18   2   31.27    1.40 
  -4  18  -2   30.79    1.66 
   5  18  -2   -0.40    0.57 
   5 -18   2    0.37    0.46 
  -5  18   2   -0.43    0.63 
   5 -18   2   -0.14    0.42 
   5  18  -2   -0.20    0.39 
   5  18   2    0.26    0.54 
   5 -18  -2   -0.29    0.43 
  -5  18  -2   -0.43    0.58 
   5  18   2   -0.51    0.40 
  -5  18  -2    0.75    0.65 
  -6  18   2   24.51    1.38 
   6 -18   2   23.11    1.21 
   6  18  -2   22.28    1.12 
   6 -18   2   23.56    1.31 
   6  18  -2   22.24    1.39 
  -6  18   2   21.30    1.43 
   6 -18  -2   23.52    1.20 
   6  18   2   22.46    1.30 
  -6  18  -2   22.90    1.33 
  -6  18  -2   25.66    1.50 
   6  18   2   22.08    1.08 
  -7  18   2   -0.70    0.64 
  -7  18   2    1.00    0.77 
   7 -18   2    0.04    0.51 
   7  18  -2   -0.41    0.63 
   7  18  -2    0.47    0.50 
   7  18   2    0.26    0.42 
   7 -18  -2    0.39    0.55 
  -7  18  -2   -0.13    0.80 
   7  18   2    0.51    0.59 
  -7  18  -2    1.18    0.67 
  -8  18   2    6.22    0.97 
   8 -18   2    5.54    0.84 
   8  18  -2    7.90    0.82 
   8  18  -2    6.39    1.03 
  -8  18   2   10.01    1.27 
   8 -18   2    7.23    0.87 
  -8  18  -2    6.10    0.90 
   8 -18  -2    8.42    0.93 
  -8  18  -2    8.81    1.12 
   8  18   2    7.35    0.73 
   8  18   2    6.49    0.96 
   9  18  -2    2.77    0.75 
  -9  18   2    4.17    0.91 
  -9  18   2    2.01    0.76 
   9  18  -2    4.77    1.02 
  -9  18   2    2.68    0.60 
   9 -18   2    2.87    0.60 
  -9  18  -2    2.52    0.97 
   9  18   2    1.92    0.72 
  -9  18  -2    1.72    0.63 
   9 -18  -2    3.42    0.75 
  -9  18  -2    4.35    0.90 
 -10  18   2    0.83    1.17 
 -10  18   2    0.67    0.63 
  10  18  -2   -1.03    0.78 
  10 -18   2    0.25    0.65 
 -10  18   2    1.34    0.82 
 -10  18  -2    0.44    0.68 
 -10  18  -2    0.99    1.23 
 -10  18  -2    0.07    1.10 
  10  18   2    0.81    0.77 
 -11  18   2    1.56    1.27 
  11  18  -2    0.50    0.90 
 -11  18   2    0.55    1.14 
 -11  18  -2   -0.33    0.68 
 -11  18  -2   -0.87    1.03 
 -11  18  -2    0.06    1.22 
   0  19   2    0.82    0.53 
   0  19   2   -0.85    0.57 
   0  19  -2   -0.22    0.59 
  -1  19   2    1.41    0.57 
  -1  19   2    2.36    0.59 
   1  19  -2    1.73    0.50 
   1 -19   2    1.41    0.43 
   1  19  -2    1.53    0.61 
  -1  19  -2    1.73    0.55 
  -1  19  -2    2.08    0.63 
   1  19   2    2.51    0.51 
   1  19   2    1.64    0.57 
  -2  19   2   14.37    1.09 
   2  19  -2   15.16    0.96 
   2 -19   2   15.69    1.06 
  -2  19   2   15.38    1.09 
   2  19  -2   14.16    1.10 
   2  19   2   15.35    1.05 
  -2  19  -2   15.26    1.03 
  -2  19  -2   13.12    1.11 
   2  19   2   15.15    0.95 
  -3  19   2    5.91    0.90 
   3  19  -2    5.76    0.92 
  -3  19   2    4.25    0.86 
   3 -19   2    5.56    0.69 
   3  19  -2    4.25    0.85 
  -3  19  -2    4.07    0.81 
   3  19   2    3.60    0.64 
  -3  19  -2    4.71    1.01 
   3  19   2    4.03    0.65 
   4 -19   2   17.17    1.13 
  -4  19   2   17.76    1.28 
  -4  19   2   17.45    1.25 
   4  19  -2   17.49    1.24 
   4  19   2   17.20    1.20 
   4 -19  -2   17.45    1.01 
  -4  19  -2   18.45    1.20 
  -4  19  -2   16.74    1.20 
   4  19   2   17.58    1.02 
  -5  19   2   -0.01    0.74 
   5  19  -2    1.79    0.66 
   5 -19   2    0.96    0.47 
  -5  19   2    1.96    0.64 
   5  19   2    0.86    0.79 
   5 -19  -2    1.31    0.48 
  -5  19  -2    1.54    0.70 
   5  19   2    0.69    0.49 
  -6  19   2    0.33    0.71 
   6 -19   2   -0.20    0.52 
   6 -19   2    0.10    0.50 
   6  19  -2   -0.25    0.69 
  -6  19   2    0.32    0.81 
   6  19  -2   -0.33    0.85 
   6  19   2    1.05    0.68 
   6 -19  -2   -0.35    0.53 
  -6  19  -2    0.99    0.72 
   6  19   2    0.59    0.51 
  -6  19  -2    0.18    0.80 
   7  19  -2   -0.26    0.51 
   7 -19   2    0.27    0.59 
  -7  19   2    0.79    0.92 
   7 -19   2    0.62    0.57 
   7  19  -2    0.74    0.73 
  -7  19   2    1.73    0.75 
  -7  19  -2    0.53    0.99 
   7  19   2   -0.57    0.71 
  -7  19  -2    1.11    0.79 
   7 -19  -2    0.56    0.61 
   7  19   2    0.13    0.49 
   8  19  -2   -1.22    0.78 
  -8  19   2    1.02    1.10 
  -8  19   2   -0.57    0.79 
   8 -19   2   -0.06    0.62 
  -8  19  -2   -1.32    0.97 
   8  19   2   -0.57    0.74 
   9 -19   2    1.42    0.67 
  -9  19   2    3.18    1.07 
   9  19  -2    0.20    0.74 
  -9  19   2    0.31    1.20 
  -9  19   2    1.78    0.64 
  -9  19  -2    3.66    1.09 
  -9  19  -2    0.58    1.12 
  -9  19  -2    0.18    0.63 
   9  19   2    3.12    0.83 
 -10  19   2    1.33    0.99 
 -10  19   2    1.60    1.19 
 -10  19   2    1.13    1.18 
  10  19  -2    2.61    0.75 
  10  19  -2    2.19    0.95 
 -10  19   2    0.00    1.17 
  10 -19   2    0.66    0.77 
 -10  19  -2    3.50    1.09 
 -10  19  -2    1.08    1.28 
  10  19   2    2.03    0.91 
 -10  19  -2    2.38    0.74 
   0  20   2    6.66    1.15 
   0  20  -2    5.50    1.11 
   0  20  -2    6.00    0.79 
   0  20   2    5.98    0.95 
  -1  20   2    4.14    0.89 
  -1  20   2    5.37    0.74 
   1  20  -2    3.84    0.73 
   1  20  -2    4.57    0.67 
   1  20   2    6.34    0.93 
  -1  20  -2    5.97    1.04 
   1  20   2    5.12    0.74 
  -1  20  -2    3.69    0.70 
   2 -20   2    0.86    0.52 
   2  20  -2    0.68    0.73 
  -2  20   2    1.09    0.70 
  -2  20   2    2.04    0.71 
   2  20  -2    1.56    0.57 
  -2  20  -2    0.55    0.64 
   2  20   2    1.39    0.59 
  -2  20  -2    1.10    0.72 
   2  20   2    2.04    0.69 
  -3  20   2    0.77    0.74 
  -3  20   2    2.26    0.75 
   3 -20   2    0.54    0.51 
   3  20  -2    1.32    0.56 
   3  20  -2    0.17    0.72 
   3  20   2    1.12    0.71 
  -3  20  -2    1.44    0.68 
   3  20   2    1.54    0.57 
  -3  20  -2    1.60    0.74 
  -4  20   2   -0.53    0.82 
  -4  20   2    0.42    0.74 
   4 -20   2    0.66    0.52 
   4  20  -2    1.67    0.55 
   4  20  -2    0.54    0.75 
   4  20   2    0.92    0.73 
   4  20   2    0.14    0.56 
  -4  20  -2    0.66    0.81 
  -4  20  -2    2.12    0.79 
   4 -20  -2    0.96    0.51 
  -5  20   2    0.73    0.92 
   5  20  -2   -0.08    0.55 
   5  20  -2   -1.19    0.77 
  -5  20   2    0.67    0.80 
   5 -20   2   -0.17    0.57 
  -5  20  -2    1.13    0.80 
   5  20   2    0.31    0.55 
   5 -20  -2    0.89    0.53 
  -5  20  -2   -0.64    0.79 
  -6  20   2   29.60    1.69 
   6  20  -2   29.22    1.69 
   6 -20   2   25.35    1.57 
  -6  20   2   31.40    1.79 
   6  20  -2   30.54    1.39 
  -6  20  -2   29.74    1.72 
   6 -20  -2   24.66    1.38 
   6  20   2   31.07    1.64 
   6  20   2   27.33    1.36 
  -7  20   2    1.57    0.88 
  -7  20   2    4.88    1.07 
   7  20  -2    2.87    0.61 
   7  20  -2    1.76    1.09 
  -7  20  -2    4.17    0.96 
   7  20   2    1.30    0.60 
  -8  20   2    5.88    1.20 
   8  20  -2    3.39    0.93 
  -8  20   2    3.53    0.93 
   8 -20   2    3.09    0.73 
  -8  20  -2    4.53    1.14 
  -8  20  -2    2.74    1.24 
   0  21  -2   -1.13    0.80 
   0  21   2    1.20    0.81 
   0  21   2   -0.28    0.73 
  -1  21   2    0.38    0.77 
   1  21  -2    1.22    0.82 
   1  21  -2    0.43    0.67 
  -1  21   2    0.60    0.81 
  -1  21  -2    0.48    0.82 
  -1  21  -2    0.74    0.72 
   1  21   2    2.32    0.80 
   1  21   2    1.46    0.72 
   2  21  -2    2.68    0.67 
   2  21  -2    2.29    0.82 
   2  21   2    3.53    1.22 
  -2  21  -2    3.55    0.86 
  -2  21  -2    2.75    0.76 
   2  21   2    1.43    0.82 
  -3  21   2    5.56    1.19 
   3  21  -2    4.36    0.87 
   3  21  -2    3.84    0.85 
  -3  21   2    5.10    0.89 
   3  21   2    6.00    0.92 
  -3  21  -2    6.46    1.21 
   3  21   2    5.56    0.87 
  -3  21  -2    6.32    1.09 
  -4  21   2   14.12    1.35 
   4  21  -2   11.39    1.29 
   4  21  -2   10.58    0.96 
   4  21   2   12.89    1.26 
  -4  21  -2   13.21    1.27 
   4  21   2   10.53    0.96 
  -4  21  -2   12.27    1.33 
   5  21  -2    9.53    0.90 
   5  21  -2    7.97    1.32 
  -5  21   2    7.49    1.34 
  -5  21   2    8.27    1.34 
   5 -21   2    5.17    1.01 
   5  21   2    7.90    0.91 
  -5  21  -2    8.32    1.35 
   5 -21  -2    5.48    0.92 
   5  21   2    5.16    0.96 
  -6  21   2    2.15    0.98 
  -6  21   2    1.02    1.17 
   6  21  -2    0.33    0.69 
   6 -21   2    0.70    0.71 
   6  21  -2   -1.29    0.95 
  -6  21  -2    1.15    0.99 
  -6  21  -2    1.74    1.12 
   6 -21  -2    0.83    0.68 
   6  21   2   -0.22    0.94 
   6  21   2    1.48    0.70 
  -7  21   2    2.15    1.03 
   7  21  -2    3.58    0.72 
   7  21   2    6.52    1.35 
   7  21   2    3.88    0.74 
  -7  21  -2    1.96    1.27 
   0  22  -2   24.86    1.56 
   0  22   2   30.96    1.64 
   1  22  -2    3.68    0.83 
   1  22   2    3.21    0.85 
   2  22  -2    4.21    0.82 
  -2  22   2    6.27    1.28 
  -2  22  -2    7.52    1.18 
   2  22   2    5.74    1.08 
   3  22  -2    5.19    1.01 
  -3  22   2    4.31    1.06 
   3  22   2    6.69    1.04 
  -3  22  -2    4.37    0.98 
   4  22  -2   -0.36    0.78 
  -4  22   2   -1.27    1.15 
  -4  22  -2    0.58    1.04 
  -5  22   2    3.05    1.21 
   5  22   2   -0.19    0.81 
  -5  22  -2    3.01    1.16 
   0  23   2    1.57    1.04 
   0  23  -2    0.13    0.95 
   1  23  -2    8.08    1.28 
  -1  23  -2    6.73    1.09 
   0   0  -3    0.05    0.07 
   0   0   3    0.03    0.07 
   0   0   3    0.08    0.05 
  -1   0  -3    0.01    0.05 
   1   0  -3    0.04    0.06 
   1   0   3   -0.08    0.05 
  -1   0   3    0.08    0.07 
   2   0  -3   -0.53    0.06 
  -2   0   3   -0.33    0.10 
  -2   0   3   -0.47    0.06 
   2   0   3   -0.50    0.05 
  -2   0  -3   -0.53    0.05 
  -2   0  -3   -0.51    0.06 
  -2   0  -3   -0.48    0.06 
  -3   0   3    0.00    0.12 
  -3   0  -3   -0.03    0.06 
  -3   0  -3   -0.17    0.08 
   3   0   3   -0.04    0.05 
   3   0   3   -0.02    0.05 
   4   0  -3   -0.17    0.08 
  -4   0  -3   -0.17    0.10 
  -4   0   3   -0.11    0.06 
   4   0   3   -0.07    0.05 
  -4   0   3   -0.12    0.14 
  -4   0  -3   -0.05    0.08 
   4   0   3   -0.12    0.07 
   5   0   3   -0.03    0.09 
  -5   0   3   -0.05    0.05 
  -5   0   3   -0.19    0.17 
  -5   0  -3   -0.15    0.12 
   5   0  -3   -0.02    0.09 
  -5   0  -3   -0.15    0.10 
  -6   0  -3   -0.21    0.13 
   6   0  -3   -0.04    0.11 
  -6   0  -3   -0.03    0.15 
  -6   0   3    0.25    0.15 
   6   0   3   -0.06    0.11 
   7   0  -3   -0.25    0.12 
   7   0   3   -0.18    0.15 
  -7   0   3   -0.03    0.19 
  -7   0  -3   -0.01    0.16 
   8   0  -3   -0.06    0.13 
   8   0  -3   -0.20    0.23 
  -8   0   3    0.06    0.21 
   8   0   3   -0.01    0.17 
  -8   0  -3    0.17    0.21 
  -9   0  -3   -0.06    0.22 
   9   0  -3    0.29    0.15 
   9   0   3    0.12    0.21 
   9   0  -3   -0.09    0.23 
  -9   0   3    0.40    0.24 
 -10   0   3    0.45    0.25 
 -10   0  -3   -0.36    0.27 
  10   0  -3   -0.33    0.31 
  10   0   3   -0.01    0.24 
  12   0  -3    0.23    0.42 
 -12   0   3    0.48    0.35 
 -12   0  -3   -0.29    0.29 
  12   0   3    0.33    0.32 
  12   0  -3    0.41    0.25 
  13   0  -3   -0.47    0.27 
 -13   0  -3   -0.07    0.34 
  13   0   3    0.20    0.45 
 -13   0   3    0.08    0.35 
  13   0  -3   -0.06    0.53 
  14   0  -3   -0.11    0.54 
  14   0   3   -0.20    0.44 
  14   0  -3    0.29    0.33 
 -14   0   3    0.06    0.36 
 -14   0  -3    0.36    0.37 
  15   0  -3   -0.27    0.70 
 -15   0  -3   -0.30    0.39 
 -15   0   3    0.26    0.40 
  15   0   3    0.48    0.56 
  15   0  -3    0.28    0.39 
  16   0  -3    0.54    0.78 
 -16   0  -3    0.00    0.44 
  16   0   3   -0.35    0.66 
 -16   0   3    0.74    0.48 
 -17   0  -3   -0.36    0.51 
 -17   0   3    0.79    0.54 
  17   0  -3    0.61    0.96 
  17   0   3    2.09    0.79 
   0  -1  -3    0.00    0.06 
   0  -1   3    0.01    0.06 
   0   1   3    0.07    0.06 
   0   1  -3   -0.07    0.06 
  -1   1   3   -0.25    0.08 
   1  -1   3   -0.34    0.06 
   1   1  -3   -0.36    0.05 
  -1   1   3   -0.35    0.07 
  -1  -1   3   -0.24    0.07 
   1   1   3   -0.24    0.07 
  -1   1  -3   -0.28    0.06 
   1  -1  -3   -0.44    0.06 
  -1  -1   3   -0.35    0.07 
  -1   1  -3   -0.36    0.07 
   2  -1   3   30.90    1.10 
  -2   1   3   30.06    1.10 
   2   1  -3   29.52    1.12 
  -2   1   3   28.20    1.12 
   2  -1   3   30.08    1.03 
  -2  -1   3   30.89    1.10 
   2   1   3   28.58    1.04 
  -2   1  -3   30.60    1.06 
  -2  -1   3   29.31    1.10 
  -2   1  -3   28.52    1.06 
   2  -1  -3   29.07    1.13 
  -3   1   3  550.10   15.24 
   3  -1   3  461.37   15.08 
  -3  -1  -3  510.38   15.06 
  -3  -1  -3  448.72   15.05 
   3   1  -3  481.87   15.15 
   3  -1   3  482.44   15.09 
  -3   1   3  504.05   15.17 
   3  -1  -3  505.86   15.19 
  -3   1  -3  535.51   15.08 
  -3  -1   3  527.20   15.21 
  -3  -1   3  466.47   15.10 
  -3   1  -3  457.89   15.12 
  -3   1  -3  487.59   15.02 
  -4   1   3  246.72    7.66 
  -4  -1  -3  231.99    7.64 
   4  -1   3  251.20    7.60 
  -4   1   3  261.57    7.81 
   4   1  -3  247.12    7.68 
  -4  -1  -3  247.96    7.64 
   4  -1   3  238.61    7.66 
   4  -1  -3  247.56    7.72 
  -4  -1   3  255.64    7.82 
  -4  -1   3  245.03    7.58 
   4   1   3  235.39    7.61 
  -4   1  -3  252.37    7.66 
  -4   1  -3  235.90    7.71 
   5   1  -3  203.31    6.33 
  -5   1   3  192.54    6.19 
  -5  -1  -3  206.26    6.34 
   5  -1   3  194.97    6.35 
  -5   1   3  204.71    6.25 
   5  -1   3  202.44    6.21 
  -5   1   3  202.69    6.49 
  -5  -1  -3  191.43    6.34 
   5   1   3  190.74    6.30 
  -5  -1   3  207.30    6.49 
  -5   1  -3  207.80    6.36 
  -5   1  -3  193.60    6.41 
   5  -1  -3  207.59    6.37 
  -6  -1  -3  225.23    7.03 
  -6   1   3  223.47    7.19 
   6   1  -3  223.29    6.97 
   6  -1   3  223.86    6.83 
   6  -1   3  216.92    7.04 
   6  -1  -3  206.77    7.21 
  -6   1  -3  234.35    7.07 
  -6  -1   3  223.03    7.18 
  -6   1  -3  213.97    7.11 
   6   1   3  215.57    7.00 
   6  -1  -3  224.80    7.01 
   7  -1   3    9.55    0.58 
  -7  -1  -3    9.01    0.63 
   7   1  -3   10.10    0.52 
  -7   1   3   10.14    0.64 
  -7   1  -3   10.62    0.60 
   7   1   3    9.71    0.56 
   7  -1  -3   10.08    0.53 
  -7   1  -3    9.23    0.62 
   7  -1  -3   10.43    0.69 
  -7  -1   3   10.18    0.63 
  -8  -1  -3    3.10    0.31 
  -8   1   3    2.61    0.34 
   8  -1   3    2.65    0.31 
   8   1  -3    2.78    0.25 
   8  -1   3    2.66    0.18 
   8  -1  -3    2.64    0.38 
  -8   1  -3    2.69    0.34 
   8  -1  -3    2.23    0.26 
   8   1   3    2.43    0.31 
  -8   1  -3    3.18    0.33 
  -8  -1   3    2.81    0.35 
  -9   1   3    2.01    0.34 
   9   1  -3    1.76    0.32 
  -9  -1  -3    2.18    0.31 
   9  -1   3    1.94    0.33 
  -9   1  -3    1.76    0.31 
   9  -1  -3    1.79    0.37 
   9  -1  -3    1.91    0.25 
  -9  -1   3    1.59    0.31 
   9   1   3    1.93    0.32 
 -10  -1  -3    7.26    0.56 
  10  -1   3    7.23    0.57 
 -10   1   3    7.20    0.60 
  10   1  -3    7.10    0.45 
  10   1  -3    5.71    0.64 
  10  -1  -3    7.04    0.46 
 -10   1  -3    7.40    0.57 
  10  -1  -3    7.20    0.65 
 -10  -1   3    8.31    0.66 
  10   1   3    7.76    0.57 
  11  -1   3    0.57    0.12 
 -11  -1  -3    0.35    0.29 
  11   1  -3    0.75    0.20 
  11  -1   3    1.18    0.30 
 -11   1   3    0.57    0.32 
  11   1  -3    0.35    0.35 
 -11  -1   3    1.29    0.32 
 -11   1  -3    0.80    0.28 
  11   1   3    0.58    0.29 
 -12  -1  -3    6.93    0.58 
  12  -1   3    6.51    0.63 
  12   1  -3    5.67    0.46 
  12  -1   3    6.69    0.36 
 -12   1   3    5.39    0.63 
  12   1  -3    6.55    0.71 
 -12   1  -3    6.50    0.59 
  12  -1  -3    6.13    0.49 
  12  -1  -3    5.62    0.70 
 -12  -1   3    5.86    0.61 
  12   1   3    7.27    0.63 
 -13   1   3   16.89    1.11 
  13   1  -3   14.86    1.14 
 -13  -1  -3   15.64    0.97 
  13  -1   3   16.27    0.99 
  13  -1   3   16.20    0.67 
  13   1  -3   15.22    0.82 
 -13   1  -3   16.35    0.99 
  13  -1  -3   16.28    1.64 
  13   1   3   15.33    1.03 
 -13  -1   3   14.28    1.03 
  13  -1  -3   16.69    0.84 
  14   1  -3    1.21    0.34 
  14   1  -3    2.54    0.64 
 -14  -1  -3    0.99    0.38 
  14  -1   3    1.84    0.46 
 -14   1   3    1.31    0.38 
  14   1   3    2.93    0.64 
  14  -1  -3    2.59    0.60 
 -14  -1   3    1.84    0.36 
 -14   1  -3    1.91    0.45 
 -15   1   3    0.98    0.45 
  15   1  -3   -0.35    0.71 
  15  -1   3    0.63    0.55 
  15   1  -3    0.45    0.38 
 -15  -1  -3    0.29    0.37 
  15  -1  -3    1.19    0.68 
 -15  -1   3    0.31    0.45 
 -15   1  -3    0.93    0.41 
  16  -1   3    1.45    0.70 
  16   1  -3    1.94    0.85 
 -16  -1  -3    0.98    0.44 
  16   1  -3    1.36    0.48 
 -16   1   3    1.67    0.55 
  16  -1  -3    0.77    0.76 
  16   1   3    1.25    0.64 
 -16   1  -3    0.94    0.47 
 -16  -1   3    0.22    0.43 
 -17   1   3    8.25    0.85 
  17   1  -3    6.85    1.42 
 -17  -1  -3    8.44    0.74 
  17   1   3    8.90    1.21 
 -17   1  -3    7.18    0.79 
 -17  -1   3    8.12    0.91 
   0   2  -3   54.01    1.88 
   0  -2   3   55.78    1.88 
   0   2   3   54.43    1.86 
  -1   2   3    1.30    0.18 
   1   2  -3    1.13    0.15 
   1  -2   3    1.15    0.15 
  -1  -2   3    1.06    0.15 
  -1   2  -3    1.24    0.14 
  -1  -2   3    1.05    0.11 
  -1   2  -3    1.12    0.15 
   1  -2  -3    1.33    0.15 
   2  -2   3  194.72    6.08 
   2  -2   3  200.40    6.15 
  -2   2   3  196.14    6.13 
  -2   2   3  193.68    6.18 
   2   2  -3  192.06    6.16 
  -2   2  -3  199.84    6.01 
  -2  -2   3  195.96    6.13 
  -2   2  -3  193.51    6.14 
  -2  -2   3  199.60    6.12 
  -2   2  -3  191.85    6.11 
   2  -2  -3  196.14    6.18 
   3  -2   3   24.50    0.93 
   3   2  -3   24.74    0.95 
  -3   2   3   24.77    0.96 
  -3  -2  -3   24.01    0.86 
   3  -2   3   24.50    0.92 
  -3   2   3   24.04    0.97 
   3  -2  -3   23.68    0.97 
  -3   2  -3   24.06    0.87 
  -3  -2   3   23.49    0.89 
  -3   2  -3   23.23    0.89 
  -3  -2   3   23.99    0.95 
  -3   2  -3   23.26    0.95 
   4  -2   3   46.31    1.59 
   4  -2   3   45.07    1.62 
  -4  -2  -3   45.33    1.57 
   4   2  -3   46.08    1.62 
  -4   2   3   46.96    1.64 
  -4   2   3   47.41    1.71 
  -4   2   3   44.48    1.56 
  -4  -2   3   45.10    1.52 
   4   2   3   43.44    1.53 
   4  -2  -3   44.87    1.66 
  -4   2  -3   45.93    1.49 
  -4   2  -3   46.28    1.59 
  -4   2  -3   44.60    1.68 
  -5   2   3  140.32    4.47 
   5  -2   3  141.57    4.43 
  -5   2   3  141.60    4.65 
  -5  -2  -3  142.17    4.51 
  -5   2   3  134.47    4.39 
   5   2  -3  139.34    4.48 
   5  -2   3  137.42    4.53 
  -5   2  -3  149.83    4.53 
   5   2   3  135.24    4.44 
  -5  -2   3  138.16    4.62 
   5  -2  -3  138.73    4.71 
  -5   2  -3  134.03    4.59 
   5  -2  -3  139.28    4.54 
   6  -2   3    5.34    0.40 
  -6   2   3    5.95    0.30 
   6   2  -3    6.37    0.37 
  -6  -2  -3    6.29    0.39 
  -6   2   3    6.21    0.32 
  -6   2   3    5.49    0.43 
   6  -2   3    6.14    0.33 
  -6   2  -3    5.53    0.44 
   6   2   3    5.62    0.38 
  -6   2  -3    6.88    0.42 
  -6  -2   3    6.23    0.43 
   6  -2  -3    5.82    0.39 
   6  -2  -3    5.86    0.47 
   7  -2   3   70.33    2.36 
   7  -2   3   70.47    2.57 
  -7  -2  -3   71.94    2.57 
  -7   2   3   68.22    2.67 
   7   2  -3   73.15    2.44 
   7   2   3   71.29    2.51 
  -7   2  -3   72.12    2.56 
   7  -2  -3   73.30    2.52 
   7  -2  -3   70.18    2.73 
  -7  -2   3   70.61    2.66 
  -7   2  -3   70.65    2.66 
   8   2  -3   15.41    0.71 
  -8  -2  -3   16.00    0.81 
   8  -2   3   15.59    0.66 
   8  -2   3   15.00    0.83 
  -8   2   3   15.40    0.89 
  -8   2  -3   16.42    0.83 
   8  -2  -3   14.44    0.91 
  -8   2  -3   15.00    0.89 
   8  -2  -3   16.66    0.77 
   8   2   3   15.13    0.78 
  -8  -2   3   15.28    0.87 
   9  -2   3    2.53    0.23 
   9  -2   3    2.97    0.37 
  -9   2   3    2.23    0.38 
  -9  -2  -3    3.10    0.34 
   9   2  -3    2.30    0.27 
   9   2   3    2.42    0.35 
   9  -2  -3    3.29    0.33 
   9  -2  -3    3.19    0.53 
  -9   2  -3    3.40    0.40 
  -9  -2   3    2.72    0.35 
  -9   2  -3    2.64    0.38 
 -10  -2  -3    2.95    0.38 
  10  -2   3    3.70    0.42 
  10   2  -3    2.61    0.46 
  10  -2   3    3.10    0.24 
  10   2  -3    2.41    0.28 
 -10   2   3    3.04    0.42 
 -10   2  -3    2.79    0.38 
 -10  -2   3    2.90    0.40 
  10   2   3    3.45    0.40 
  10  -2  -3    2.33    0.46 
 -11  -2  -3    2.46    0.39 
  11   2  -3    3.57    0.32 
  11  -2   3    2.99    0.26 
 -11   2   3    3.02    0.45 
  11   2  -3    2.85    0.53 
  11  -2   3    3.62    0.46 
  11  -2  -3    3.68    0.36 
  11  -2  -3    2.90    0.53 
 -11   2  -3    3.53    0.45 
 -11  -2   3    2.80    0.42 
  11   2   3    3.06    0.45 
  12   2  -3   79.09    2.78 
  12  -2   3   80.74    2.64 
  12  -2   3   72.65    3.36 
 -12  -2  -3   81.20    3.07 
  12   2  -3   73.93    3.18 
 -12   2   3   79.52    3.27 
 -12   2  -3   79.66    3.09 
  12  -2  -3   78.44    3.23 
  12   2   3   81.68    3.02 
 -12  -2   3   75.35    3.19 
 -13   2   3    1.24    0.42 
  13  -2   3    0.89    0.40 
  13   2  -3    1.38    0.49 
  13  -2   3    0.98    0.20 
 -13  -2  -3    0.76    0.35 
  13   2  -3    0.83    0.28 
 -13   2  -3    1.17    0.34 
  13  -2  -3    1.53    0.47 
  13   2   3    1.72    0.40 
 -13  -2   3    1.02    0.40 
 -14   2   3    2.91    0.57 
  14  -2   3    2.05    1.01 
  14  -2   3    3.02    0.32 
  14   2  -3    1.76    0.59 
  14   2  -3    2.17    0.47 
 -14  -2  -3    2.46    0.46 
 -14  -2   3    2.71    0.50 
  14  -2  -3    2.31    0.54 
 -14   2  -3    1.86    0.40 
  15   2  -3    8.95    0.71 
 -15   2   3   10.21    0.89 
  15  -2   3   11.76    0.61 
 -15  -2  -3    8.66    0.75 
  15   2  -3    9.81    1.09 
 -15  -2   3   10.02    0.87 
 -15   2  -3    7.94    0.76 
  15   2   3   10.55    0.92 
  15  -2  -3    8.45    1.07 
  16   2  -3   11.51    1.24 
  16   2  -3    9.98    0.78 
 -16   2   3    9.21    0.88 
  16  -2   3   11.74    0.68 
  16  -2   3   13.41    1.12 
 -16  -2  -3   12.61    0.91 
 -16  -2   3   12.20    0.96 
  16   2   3   12.33    1.08 
  16  -2  -3   10.78    1.24 
 -16   2  -3   12.21    0.93 
 -17   2   3    0.53    0.50 
 -17  -2  -3    0.82    0.43 
  17   2  -3    0.80    0.95 
  17   2  -3    0.51    0.57 
 -17  -2   3    1.48    0.65 
  17   2   3    0.75    0.80 
 -17   2  -3    0.63    0.55 
   0   3  -3   -0.06    0.08 
   0  -3   3   -0.08    0.07 
   1   3  -3    1.62    0.18 
   1  -3   3    1.42    0.18 
   1  -3  -3    1.26    0.15 
  -1  -3   3    1.44    0.12 
  -1  -3   3    1.45    0.18 
  -1   3  -3    1.13    0.17 
  -2   3   3   95.27    3.20 
   2  -3   3   97.56    3.17 
   2  -3   3   97.36    3.11 
   2   3  -3   97.07    3.18 
  -2  -3   3   97.44    3.11 
  -2  -3   3   94.54    3.14 
  -2   3  -3   96.97    3.14 
  -2   3  -3   99.47    3.18 
   2  -3  -3   93.82    3.20 
   3  -3   3   23.12    0.91 
   3   3  -3   22.85    0.90 
  -3   3   3   21.76    0.93 
   3  -3   3   22.28    0.88 
  -3   3   3   22.04    0.88 
  -3   3  -3   21.79    0.81 
  -3  -3   3   22.46    0.85 
  -3   3  -3   23.16    0.89 
  -3  -3   3   22.01    0.89 
   3  -3  -3   20.86    0.96 
  -3   3  -3   21.59    0.92 
  -4  -3  -3    0.81    0.13 
  -4   3   3    1.17    0.19 
  -4   3   3    0.93    0.13 
  -4   3   3    0.64    0.15 
   4   3  -3    0.78    0.14 
   4  -3   3    0.78    0.13 
   4  -3   3    0.70    0.14 
  -4   3  -3    1.07    0.18 
  -4  -3   3    0.86    0.17 
  -4   3  -3    0.69    0.13 
  -4   3  -3    1.07    0.24 
   4  -3  -3    0.84    0.19 
  -4  -3   3    1.04    0.11 
   5   3  -3  205.95    6.47 
   5  -3   3  206.67    6.46 
  -5   3   3  198.20    6.42 
  -5   3   3  207.94    6.52 
  -5   3   3  211.94    6.66 
  -5  -3  -3  213.51    6.48 
   5  -3   3  203.25    6.54 
  -5  -3   3  204.40    6.61 
   5  -3  -3  204.84    6.55 
   5   3   3  196.95    6.41 
  -5   3  -3  199.99    6.63 
  -5   3  -3  210.31    6.34 
   5  -3  -3  198.18    6.70 
  -5   3  -3  218.99    6.54 
  -5  -3   3  196.91    6.30 
  -6   3   3    5.20    0.30 
   6  -3   3    5.13    0.32 
  -6   3   3    5.20    0.32 
  -6  -3  -3    4.99    0.35 
   6   3  -3    5.10    0.32 
  -6   3   3    5.36    0.40 
   6  -3   3    5.17    0.38 
   6   3   3    4.71    0.33 
   6  -3  -3    4.87    0.36 
  -6   3  -3    4.31    0.40 
  -6  -3   3    4.91    0.39 
  -6   3  -3    5.32    0.37 
   6  -3  -3    4.05    0.40 
  -7   3   3   14.65    0.61 
  -7  -3  -3   15.12    0.72 
  -7   3   3   14.70    0.81 
   7  -3   3   15.26    0.79 
  -7   3   3   14.31    0.58 
   7   3  -3   14.44    0.67 
   7  -3   3   14.26    0.65 
  -7   3  -3   13.80    0.82 
  -7   3  -3   15.45    0.76 
   7   3   3   14.71    0.72 
   7  -3  -3   14.06    0.71 
   7  -3  -3   14.02    0.84 
  -8  -3  -3    5.13    0.41 
   8  -3   3    5.83    0.46 
  -8   3   3    6.07    0.50 
   8   3  -3    5.71    0.36 
   8  -3   3    5.74    0.35 
  -8   3  -3    5.01    0.47 
  -8  -3   3    5.51    0.45 
   8  -3  -3    5.63    0.53 
   8   3   3    5.79    0.42 
   8  -3  -3    5.57    0.39 
  -8   3  -3    5.75    0.46 
   9  -3   3  104.53    3.52 
  -9  -3  -3  108.33    3.76 
  -9   3   3  104.99    3.95 
   9  -3   3  111.70    3.83 
   9   3  -3  107.87    3.58 
   9   3   3  107.68    3.72 
  -9  -3   3  108.90    3.93 
   9  -3  -3  105.11    3.98 
  -9   3  -3  106.49    3.81 
 -10   3   3   10.68    0.78 
  10  -3   3   11.07    0.55 
  10  -3   3   11.43    0.74 
 -10  -3  -3   10.62    0.68 
  10   3  -3   10.82    0.59 
 -10   3  -3   11.14    0.74 
 -10   3  -3   12.03    0.81 
  10   3   3   10.99    0.71 
 -10  -3   3   10.99    0.77 
  10  -3  -3   10.64    0.82 
  11  -3   3    5.30    0.37 
  11   3  -3    4.12    0.61 
 -11  -3  -3    5.88    0.51 
 -11   3   3    5.88    0.58 
  11  -3   3    6.52    0.56 
  11   3  -3    5.27    0.40 
 -11   3  -3    5.12    0.53 
  11   3   3    5.24    0.53 
  11  -3  -3    5.52    0.63 
 -11  -3   3    5.49    0.56 
  12  -3   3    0.36    0.37 
 -12   3   3    0.34    0.38 
  12  -3   3    0.55    0.18 
  12   3  -3    0.43    0.23 
  12   3  -3    0.20    0.39 
 -12  -3  -3    0.72    0.28 
  12   3   3    0.48    0.33 
 -12   3  -3    0.46    0.38 
 -12  -3   3    0.42    0.29 
  12  -3  -3    0.70    0.45 
  13  -3   3    1.07    0.43 
  13  -3   3    0.42    0.21 
  13   3  -3    0.09    0.46 
 -13   3   3    0.89    0.37 
  13   3  -3    0.21    0.27 
 -13  -3  -3    0.47    0.32 
 -13  -3   3    0.16    0.30 
 -13   3  -3    0.17    0.38 
  13   3   3    0.33    0.39 
  13  -3  -3   -0.06    0.45 
  14   3  -3    5.75    0.82 
 -14  -3  -3    6.57    0.59 
 -14   3   3    6.45    0.71 
  14  -3   3    6.46    0.45 
  14   3  -3    5.35    0.52 
  14  -3   3    7.24    0.74 
  14  -3  -3    5.26    0.87 
 -14   3  -3    6.18    0.63 
 -14  -3   3    7.19    0.66 
  14   3   3    6.78    0.74 
 -15   3   3   11.78    0.94 
  15  -3   3   12.84    0.71 
  15  -3   3   14.95    1.07 
  15   3  -3   12.32    1.14 
 -15  -3  -3   13.72    0.92 
  15   3  -3   13.92    0.80 
 -15  -3   3   12.83    0.99 
  15   3   3   14.24    1.04 
  15  -3  -3   11.92    1.15 
 -15   3  -3   11.82    0.93 
  16   3  -3    4.08    0.68 
 -16   3   3    5.59    0.69 
  16  -3   3    6.44    0.99 
 -16  -3  -3    5.10    0.60 
 -16  -3   3    4.04    0.65 
  16  -3  -3    5.69    1.02 
 -16   3  -3    5.12    0.67 
  17   3  -3    2.80    0.57 
  17  -3   3    2.17    0.82 
  17   3  -3    1.41    0.98 
 -17  -3  -3    1.82    0.44 
 -17   3   3    1.96    0.61 
 -17   3  -3    2.40    0.59 
   0  -4  -3   22.16    0.82 
   0   4  -3   22.20    0.93 
   0  -4   3   23.18    0.93 
   0   4   3   21.99    0.84 
   1   4  -3  306.55    9.40 
   1  -4   3  301.54    9.39 
  -1   4   3  297.11    9.36 
  -1   4  -3  307.39    9.32 
   1  -4  -3  299.57    9.33 
  -1   4  -3  301.03    9.41 
  -1  -4   3  296.04    9.37 
   2  -4   3  513.62   15.65 
   2   4  -3  491.79   15.70 
   2  -4   3  519.28   15.72 
  -2   4   3  501.82   15.75 
  -2   4  -3  520.81   15.70 
   2  -4  -3  507.92   15.73 
  -2  -4   3  465.84   15.65 
  -2   4  -3  523.19   15.73 
  -2  -4   3  552.22   15.63 
  -3   4   3    1.79    0.23 
  -3   4   3    2.26    0.21 
   3   4  -3    2.19    0.20 
  -3   4   3    2.27    0.23 
   3  -4   3    2.27    0.21 
   3  -4   3    2.14    0.20 
  -3  -4   3    2.16    0.22 
  -3   4  -3    2.01    0.23 
  -3  -4   3    2.20    0.18 
  -3   4  -3    1.86    0.20 
   3  -4  -3    2.43    0.24 
   4  -4   3    0.29    0.09 
   4  -4   3    0.26    0.12 
  -4   4   3    0.16    0.13 
  -4   4   3    0.21    0.13 
   4  -4  -3    0.20    0.13 
  -4   4  -3    0.06    0.10 
  -4   4  -3    0.23    0.09 
  -4  -4   3    0.12    0.12 
  -4  -4   3    0.34    0.09 
  -4   4  -3    0.31    0.15 
  -5   4   3    0.70    0.14 
   5  -4   3    0.73    0.16 
   5   4  -3    1.02    0.15 
  -5   4   3    0.66    0.15 
   5  -4   3    0.61    0.15 
  -5  -4  -3    0.78    0.13 
  -5   4  -3    0.46    0.16 
   5  -4  -3    0.77    0.17 
  -6   4   3  110.02    3.66 
   6  -4   3  109.34    3.73 
  -6   4   3  110.65    3.58 
   6  -4   3  106.85    3.61 
   6   4  -3  111.89    3.62 
  -6   4   3  111.14    3.83 
  -6   4  -3  107.43    3.85 
  -6   4  -3  115.19    3.73 
   6  -4  -3  107.36    3.89 
   6   4   3  108.24    3.60 
  -6   4  -3  110.61    3.48 
   7   4  -3   26.85    1.07 
   7  -4   3   26.92    1.19 
  -7  -4  -3   26.96    1.13 
  -7   4   3   26.36    1.04 
  -7   4   3   26.79    1.27 
   7  -4   3   26.34    1.07 
  -7   4   3   26.12    1.00 
   7   4   3   26.13    1.09 
  -7   4  -3   26.53    1.28 
   7  -4  -3   25.99    1.29 
  -8  -4  -3   26.46    1.15 
  -8   4   3   25.33    1.27 
   8  -4   3   25.36    1.19 
   8   4  -3   26.86    1.07 
  -8   4   3   26.28    0.95 
   8  -4   3   26.30    1.06 
   8   4   3   25.75    1.12 
  -8   4  -3   24.81    1.27 
  -8   4  -3   26.72    1.19 
  -8  -4   3   24.73    1.21 
   8  -4  -3   23.22    1.25 
   9  -4   3   21.36    1.08 
  -9  -4  -3   21.31    1.02 
   9  -4   3   20.81    0.90 
   9   4  -3   21.61    0.92 
  -9   4   3   20.88    1.17 
  -9   4  -3   20.46    1.05 
   9   4   3   21.44    1.01 
   9  -4  -3   20.03    1.16 
  -9   4  -3   20.89    1.18 
  10   4  -3   14.90    0.74 
  10  -4   3   15.53    0.74 
 -10   4   3   16.15    1.00 
 -10  -4  -3   14.76    0.84 
  10  -4   3   15.69    0.91 
  10  -4  -3   15.41    1.01 
  10   4   3   16.01    0.86 
 -10  -4   3   15.40    0.93 
 -10   4  -3   14.68    0.88 
 -10   4  -3   14.04    0.95 
  11  -4   3    0.44    0.18 
 -11   4   3    0.64    0.35 
 -11  -4  -3    0.27    0.24 
  11  -4   3    0.63    0.30 
  11   4  -3    0.16    0.21 
  11  -4  -3    0.15    0.34 
 -11   4  -3    0.68    0.33 
 -11  -4   3    0.48    0.30 
  11   4   3   -0.05    0.29 
 -11   4  -3    0.15    0.34 
  12  -4   3   35.66    1.39 
 -12  -4  -3   35.00    1.63 
  12   4  -3   34.87    1.77 
 -12   4   3   35.08    1.81 
  12   4  -3   34.75    1.42 
  12  -4   3   34.05    1.64 
 -12  -4   3   35.30    1.76 
 -12   4  -3   35.62    1.69 
  12   4   3   34.68    1.59 
  12  -4  -3   34.27    1.85 
  13  -4   3    1.71    0.47 
  13   4  -3    2.27    0.51 
  13  -4   3    1.79    0.27 
 -13   4   3    1.88    0.43 
  13   4  -3    1.25    0.29 
 -13  -4  -3    1.46    0.32 
  13  -4  -3    1.00    0.47 
 -13  -4   3    1.66    0.43 
 -13   4  -3    1.44    0.42 
  14   4  -3    0.58    0.56 
  14  -4   3    1.69    0.31 
 -14  -4  -3    1.64    0.37 
  14  -4   3    2.05    0.50 
 -14   4   3    1.96    0.49 
  14   4  -3    1.56    0.36 
 -14   4  -3    1.40    0.42 
  14  -4  -3    1.05    0.56 
 -14  -4   3    0.99    0.37 
  15   4  -3    0.35    0.39 
  15   4  -3   -0.62    0.67 
 -15  -4  -3    1.50    0.53 
  15  -4   3    0.77    0.34 
  15  -4   3    0.73    0.62 
 -15   4   3    1.09    0.49 
  15  -4  -3    0.27    0.72 
 -15  -4   3    0.60    0.39 
 -15   4  -3    0.65    0.43 
  15   4   3    0.96    0.55 
  16  -4   3   45.23    2.19 
 -16  -4  -3   49.10    2.25 
  16   4  -3   48.53    1.92 
  16   4  -3   48.25    2.40 
 -16   4   3   46.08    2.43 
  16  -4   3   49.38    1.87 
  16  -4  -3   48.38    2.68 
 -16   4  -3   46.95    2.27 
  16   4   3   49.10    2.26 
 -16  -4   3   46.52    2.34 
  17  -4   3    2.30    0.85 
 -17  -4  -3    0.63    0.45 
  17   4  -3    1.09    1.05 
  17   4  -3    1.30    0.59 
 -17  -4   3    1.36    0.57 
 -17   4  -3    0.90    0.55 
  17   4   3    2.62    1.14 
   0   5  -3    0.08    0.07 
   0  -5  -3    0.05    0.06 
   0   5  -3   -0.03    0.08 
   0  -5   3   -0.05    0.07 
   0   5   3   -0.06    0.07 
   1   5  -3  186.11    5.95 
  -1   5   3  183.26    5.90 
   1  -5   3  186.68    5.94 
  -1   5  -3  186.79    5.96 
   1  -5  -3  184.00    5.86 
  -1  -5   3  187.25    5.91 
   1   5   3  187.51    5.76 
  -1   5  -3  185.88    5.87 
   2  -5   3   13.54    0.67 
   2   5  -3   13.67    0.66 
  -2   5   3   13.54    0.65 
  -2   5   3   12.81    0.67 
   2  -5   3   14.36    0.62 
  -2   5  -3   14.54    0.66 
   2  -5  -3   13.24    0.65 
  -2   5  -3   13.65    0.67 
  -2  -5   3   13.85    0.64 
   3   5  -3  187.15    5.95 
   3  -5   3  188.51    5.92 
  -3   5   3  183.38    6.06 
   3  -5   3  184.72    5.96 
  -3   5   3  182.38    5.93 
  -3   5  -3  188.48    5.98 
  -3  -5   3  186.47    5.88 
  -3  -5   3  190.53    5.89 
   3  -5  -3  184.79    6.02 
  -4   5   3   19.74    0.91 
   4  -5   3   20.03    0.87 
  -4   5   3   19.83    0.89 
  -4   5   3   20.28    0.86 
   4   5  -3   20.41    0.87 
  -4   5   3   17.89    0.95 
   4  -5   3   19.97    0.89 
  -4   5  -3   20.46    0.81 
  -4  -5   3   19.90    0.79 
  -4   5  -3   19.82    0.87 
  -4  -5   3   19.64    0.86 
   4  -5  -3   19.14    0.94 
   5   5  -3   41.66    1.51 
   5  -5   3   41.32    1.53 
  -5   5   3   41.25    1.51 
  -5   5   3   37.65    1.57 
  -5   5   3   39.03    1.56 
   5  -5   3   39.71    1.55 
  -5   5  -3   41.42    1.50 
   5  -5  -3   38.59    1.73 
  -5   5  -3   40.00    1.49 
  -5  -5   3   39.65    1.37 
  -5  -5   3   38.69    1.54 
  -6   5   3   22.46    0.92 
  -6   5   3   20.83    1.03 
   6  -5   3   21.77    0.94 
   6  -5   3   21.35    0.99 
   6   5  -3   22.12    0.92 
  -6  -5  -3   21.99    0.92 
  -6   5   3   20.80    0.95 
   6   5   3   21.40    0.87 
  -6   5  -3   21.43    0.87 
  -6   5  -3   22.38    0.96 
  -6  -5   3   19.80    0.97 
  -6   5  -3   20.39    1.07 
   6  -5  -3   20.74    1.07 
  -7   5   3    0.21    0.15 
   7   5  -3    0.42    0.13 
   7  -5   3    0.19    0.18 
  -7   5   3    0.91    0.25 
   7  -5   3    0.31    0.12 
  -7  -5  -3    0.27    0.14 
  -7   5   3    0.25    0.11 
  -7  -5   3    0.67    0.18 
   7   5   3    0.26    0.15 
   7  -5  -3    0.33    0.19 
  -7   5  -3    0.41    0.23 
  -7   5  -3    0.11    0.20 
  -8   5   3   18.17    0.76 
  -8  -5  -3   16.87    0.85 
   8  -5   3   18.06    0.83 
  -8   5   3   17.49    0.74 
   8   5  -3   18.16    0.81 
   8  -5   3   17.12    0.92 
  -8   5   3   17.27    0.98 
  -8   5  -3   18.01    0.90 
   8   5   3   17.51    0.83 
   8  -5  -3   16.76    0.99 
  -8  -5   3   16.57    0.93 
  -8   5  -3   16.67    1.00 
   9   5  -3   86.90    2.96 
   9  -5   3   87.12    2.98 
  -9   5   3   85.38    3.32 
  -9  -5  -3   86.52    3.10 
   9  -5   3   88.41    3.19 
  -9   5  -3   85.07    3.36 
   9   5   3   84.21    3.03 
   9  -5  -3   85.87    3.33 
  -9  -5   3   84.03    3.21 
  -9   5  -3   85.89    3.18 
 -10  -5  -3   34.22    1.51 
  10   5  -3   35.13    1.38 
  10  -5   3   35.50    1.58 
 -10   5   3   33.36    1.68 
  10  -5   3   34.22    1.39 
 -10   5  -3   36.71    1.61 
 -10   5  -3   32.91    1.72 
  10  -5  -3   32.44    2.00 
 -10  -5   3   34.83    1.64 
  10   5   3   35.01    1.49 
  11  -5   3    1.67    0.28 
  11   5  -3    1.32    0.25 
 -11   5   3    0.86    0.33 
 -11  -5  -3    1.18    0.33 
 -11   5  -3    1.23    0.37 
 -11   5  -3    1.29    0.35 
 -11  -5   3    1.14    0.30 
  11   5   3    1.67    0.34 
  11  -5  -3    0.49    0.37 
 -12  -5  -3    7.94    0.61 
  12  -5   3    8.64    0.53 
  12   5  -3    7.52    0.54 
 -12   5   3    7.34    0.71 
  12  -5   3    8.36    0.71 
 -12   5  -3    7.16    0.66 
  12  -5  -3    7.18    0.91 
  12   5   3    7.61    0.66 
 -12  -5   3    7.74    0.70 
  13  -5   3    6.80    0.50 
 -13   5   3    7.51    0.68 
 -13  -5  -3    6.36    0.58 
  13   5  -3    5.65    0.50 
  13  -5   3    7.27    0.71 
  13  -5  -3    6.58    0.84 
  13   5   3    6.63    0.66 
 -13  -5   3    7.44    0.69 
 -13   5  -3    5.45    0.64 
  14  -5   3    8.60    0.60 
  14   5  -3    6.93    0.87 
 -14   5   3    7.72    0.75 
 -14  -5  -3    7.61    0.65 
  14  -5   3    8.05    0.81 
 -14  -5   3    7.45    0.73 
  14  -5  -3    7.55    0.96 
 -14   5  -3    6.89    0.75 
  14   5   3    8.64    0.80 
 -15  -5  -3   -0.15    0.37 
 -15   5   3    0.70    0.47 
  15   5  -3   -0.58    0.72 
  15  -5   3    1.25    0.38 
  15   5  -3    0.11    0.40 
  15  -5   3   -0.32    0.58 
 -15   5  -3    1.44    0.53 
  15  -5  -3    1.56    0.81 
 -15  -5   3    0.25    0.39 
  15   5   3    1.20    0.58 
  16  -5   3    7.93    1.09 
  16   5  -3    9.63    1.24 
 -16   5   3    8.13    0.84 
 -16  -5  -3    7.44    0.69 
  16   5  -3    6.29    0.74 
  16   5   3    9.02    1.66 
 -16   5  -3    8.30    0.82 
  16  -5  -3    9.12    1.35 
 -16  -5   3    6.22    0.70 
  17   5  -3    3.28    0.66 
 -17  -5  -3    2.20    0.48 
  17   5  -3    2.09    1.08 
 -17   5   3    2.70    0.81 
 -17  -5   3    1.91    0.47 
 -17   5  -3    2.92    0.56 
   0  -6  -3    2.79    0.19 
   0   6  -3    2.77    0.23 
   0   6   3    2.45    0.21 
  -1   6   3   82.45    2.86 
  -1  -6  -3   88.64    2.68 
  -1   6   3   80.34    2.86 
   1   6  -3   83.53    2.91 
   1  -6  -3   81.49    2.79 
  -1  -6   3   85.96    2.88 
  -1   6  -3   85.83    2.84 
  -1   6  -3   86.07    2.93 
   1   6   3   84.81    2.73 
   2  -6   3   99.70    3.45 
  -2   6   3  103.23    3.45 
   2  -6   3  104.60    3.38 
   2   6  -3  103.67    3.47 
  -2   6   3  102.19    3.49 
  -2   6  -3  104.68    3.45 
   2  -6  -3   99.87    3.42 
  -2   6  -3  103.37    3.48 
  -2  -6   3  102.76    3.41 
  -3   6   3   13.46    0.75 
   3  -6   3   15.00    0.73 
   3  -6   3   15.04    0.69 
  -3   6   3   15.90    0.73 
   3   6  -3   14.17    0.71 
  -3   6  -3   14.84    0.73 
  -3  -6   3   14.60    0.65 
  -3   6  -3   15.04    0.76 
   3  -6  -3   14.29    0.73 
  -3  -6   3   14.57    0.67 
  -4   6   3   10.26    0.66 
   4  -6   3   11.48    0.59 
   4  -6   3   11.26    0.61 
   4   6  -3   10.69    0.58 
  -4   6   3   11.14    0.59 
   4  -6  -3   10.76    0.63 
  -4  -6   3   11.08    0.53 
  -4   6  -3   11.00    0.60 
  -4   6  -3   11.26    0.66 
   5  -6   3    2.26    0.25 
  -5   6   3    2.53    0.25 
  -5   6   3    2.00    0.25 
   5  -6   3    2.38    0.26 
   5   6  -3    2.24    0.23 
  -5   6   3    1.95    0.27 
  -5   6   3    1.75    0.30 
  -5   6  -3    2.39    0.25 
  -5   6  -3    2.78    0.26 
   5  -6  -3    1.98    0.29 
  -5  -6   3    2.21    0.18 
  -5  -6   3    2.11    0.23 
  -5   6  -3    2.20    0.33 
   6  -6   3    0.82    0.19 
   6   6  -3    1.02    0.18 
  -6   6   3    0.88    0.23 
  -6   6   3    0.81    0.16 
  -6   6   3    1.31    0.26 
  -6   6   3    0.75    0.18 
   6  -6   3    0.78    0.17 
  -6   6  -3    0.96    0.24 
  -6   6  -3    0.71    0.24 
  -6  -6   3    0.52    0.16 
  -6   6  -3    0.93    0.18 
   6  -6  -3    0.66    0.21 
  -7   6   3   15.34    0.72 
   7   6  -3   15.52    0.74 
  -7   6   3   14.15    0.83 
   7  -6   3   14.67    0.79 
   7  -6   3   16.07    0.77 
  -7   6   3   15.61    0.76 
  -7  -6  -3   15.28    0.74 
  -7   6  -3   15.90    0.68 
   7  -6  -3   13.56    0.84 
  -7  -6   3   14.21    0.79 
   7   6   3   14.43    0.69 
  -7   6  -3   14.36    0.92 
  -7   6  -3   15.03    0.78 
   8  -6   3  119.62    4.17 
  -8   6   3  121.19    3.93 
  -8   6   3  121.64    4.00 
   8   6  -3  122.08    4.00 
   8  -6   3  122.09    4.03 
  -8   6   3  118.46    4.30 
  -8  -6  -3  117.75    4.05 
   8   6   3  116.86    3.99 
  -8   6  -3  114.46    4.35 
  -8  -6   3  116.99    4.17 
   8  -6  -3  117.25    4.31 
  -8   6  -3  123.62    4.19 
   9  -6   3    0.91    0.17 
   9   6  -3    1.02    0.19 
  -9  -6  -3    0.89    0.26 
  -9   6   3    0.70    0.30 
   9  -6   3    0.68    0.27 
  -9   6   3    0.58    0.17 
  -9   6   3    0.77    0.16 
   9   6   3    0.84    0.22 
  -9  -6   3    1.11    0.24 
  -9   6  -3    0.68    0.29 
   9  -6  -3    0.70    0.34 
  -9   6  -3    0.94    0.29 
  10   6  -3   14.14    0.72 
  10  -6   3   14.58    0.73 
 -10  -6  -3   13.70    0.79 
  10  -6   3   12.57    1.02 
 -10   6   3   13.18    0.89 
  10   6   3   13.63    0.77 
  10  -6  -3   12.68    0.92 
 -10   6  -3   14.62    0.98 
 -10   6  -3   13.67    0.86 
 -10  -6   3   13.00    0.83 
  11  -6   3   39.07    1.58 
  11   6  -3   39.28    1.56 
 -11   6   3   37.36    1.90 
 -11  -6  -3   39.49    1.71 
  11  -6   3   40.45    1.79 
 -11   6  -3   36.36    1.91 
  11   6   3   40.47    1.67 
 -11  -6   3   38.08    1.81 
 -11   6  -3   41.51    1.82 
  11  -6  -3   37.52    1.88 
  12   6  -3   20.74    0.98 
 -12  -6  -3   19.93    1.09 
 -12   6   3   21.66    1.31 
  12  -6   3   21.86    1.23 
  12  -6   3   19.42    0.98 
 -12  -6   3   20.14    1.20 
  12   6   3   20.09    1.08 
 -12   6  -3   18.01    1.32 
  12  -6  -3   21.14    1.28 
 -12   6  -3   19.93    1.16 
  13   6  -3    4.34    0.77 
  13   6  -3    4.07    0.50 
  13  -6   3    5.57    0.47 
  13  -6   3    6.34    0.71 
 -13  -6  -3    5.46    0.52 
 -13   6   3    5.73    0.66 
 -13   6  -3    4.38    0.63 
  13  -6  -3    5.53    0.81 
  13   6   3    4.82    0.63 
 -13  -6   3    5.83    0.59 
 -14  -6  -3    0.12    0.31 
  14   6  -3    1.71    0.64 
  14  -6   3    0.03    0.51 
 -14   6   3    0.73    0.46 
  14  -6   3    0.62    0.33 
  14   6  -3    0.08    0.37 
 -14   6  -3    1.03    0.50 
  14   6   3    1.02    0.49 
 -14  -6   3    1.11    0.35 
  14  -6  -3    0.93    0.61 
 -15   6   3    0.67    0.46 
  15   6  -3    0.04    0.72 
  15   6  -3    0.40    0.43 
  15  -6   3    0.57    0.62 
 -15  -6  -3    0.41    0.33 
  15  -6   3    1.19    0.42 
 -15   6  -3    0.24    0.53 
  15  -6  -3    0.33    0.76 
 -15  -6   3    0.77    0.38 
 -16   6   3   26.32    1.69 
 -16  -6  -3   28.94    1.51 
  16  -6   3   32.66    1.37 
  16   6  -3   26.57    1.31 
  16   6  -3   23.77    1.72 
  16  -6   3   27.13    1.60 
 -16   6  -3   27.63    1.60 
 -16  -6   3   24.96    1.54 
  16   6   3   31.04    1.59 
   0  -7  -3    0.05    0.08 
   0   7   3    0.15    0.10 
   0   7   3    0.13    0.10 
   0  -7   3   -0.02    0.09 
   0   7  -3    0.12    0.09 
   0   7  -3   -0.09    0.11 
  -1   7   3    7.95    0.47 
   1   7  -3    8.52    0.45 
  -1  -7  -3    9.39    0.38 
  -1   7   3    8.04    0.48 
   1  -7   3    8.30    0.51 
   1   7  -3    7.36    0.49 
  -1   7  -3    7.17    0.49 
   1  -7  -3    7.98    0.44 
  -1   7  -3    8.71    0.49 
   1   7   3    8.53    0.42 
  -1  -7   3    7.99    0.49 
   1   7   3    7.82    0.48 
   2  -7   3   54.15    1.90 
   2  -7   3   53.43    1.99 
   2   7  -3   52.68    1.98 
  -2   7   3   52.08    1.96 
  -2   7   3   52.18    2.00 
  -2   7  -3   54.21    2.01 
  -2   7  -3   54.38    1.98 
  -2  -7   3   54.06    1.94 
   2  -7  -3   51.62    1.92 
   3  -7   3   54.16    1.94 
  -3   7   3   52.36    2.07 
  -3   7   3   53.93    1.99 
   3   7  -3   52.36    1.98 
   3  -7   3   54.76    2.01 
  -3  -7   3   53.61    1.92 
   3  -7  -3   52.79    1.99 
  -3   7  -3   54.02    2.04 
  -3   7  -3   52.61    2.01 
  -4   7   3   27.20    1.27 
   4  -7   3   27.85    1.19 
  -4   7   3   26.77    1.16 
   4  -7   3   26.66    1.14 
   4   7  -3   27.62    1.16 
   4  -7  -3   26.58    1.20 
  -4   7  -3   27.58    1.19 
  -4  -7   3   26.99    1.08 
  -4  -7   3   27.27    1.10 
   5   7  -3    1.33    0.21 
   5  -7   3    1.48    0.22 
   5  -7   3    1.97    0.24 
  -5   7   3    1.75    0.23 
  -5   7   3    1.27    0.28 
  -5   7   3    1.59    0.26 
  -5  -7   3    1.86    0.20 
  -5   7  -3    1.23    0.24 
   5  -7  -3    1.55    0.27 
  -5   7  -3    2.05    0.24 
  -5  -7   3    1.83    0.17 
   6   7  -3    0.22    0.14 
  -6   7   3    0.30    0.20 
  -6   7   3    0.27    0.23 
   6  -7   3    0.39    0.19 
   6  -7   3    0.38    0.13 
  -6   7   3    0.23    0.15 
  -6   7  -3    0.72    0.22 
  -6   7  -3    0.25    0.20 
  -6  -7   3    0.58    0.17 
  -6   7  -3    0.57    0.16 
   6  -7  -3    0.27    0.19 
   7  -7   3    5.45    0.44 
   7  -7   3    5.14    0.40 
  -7   7   3    4.90    0.51 
   7   7  -3    5.00    0.38 
  -7   7   3    6.20    0.42 
  -7   7   3    5.01    0.37 
  -7   7   3    6.03    0.49 
  -7   7  -3    5.68    0.44 
  -7   7  -3    5.13    0.36 
  -7   7  -3    5.36    0.55 
   7  -7  -3    6.26    0.53 
  -7  -7   3    5.19    0.41 
  -8   7   3   33.13    1.33 
   8   7  -3   33.56    1.37 
  -8  -7  -3   33.32    1.39 
   8  -7   3   34.31    1.41 
   8  -7   3   33.16    1.48 
  -8   7   3   33.12    1.37 
  -8   7   3   32.82    1.56 
  -8   7  -3   34.00    1.26 
   8   7   3   33.07    1.33 
   8  -7  -3   33.21    1.57 
  -8   7  -3   32.55    1.65 
  -8   7  -3   33.70    1.46 
  -8  -7   3   32.35    1.46 
  -9  -7  -3   16.06    0.85 
   9   7  -3   17.19    0.83 
   9  -7   3   17.19    0.95 
  -9   7   3   16.72    0.78 
   9  -7   3   17.68    0.86 
  -9   7   3   17.13    0.76 
  -9   7   3   16.35    1.00 
   9   7   3   16.41    0.83 
  -9   7  -3   15.93    1.03 
  -9  -7   3   16.75    0.93 
   9  -7  -3   14.27    1.30 
  -9   7  -3   15.83    0.92 
 -10   7   3   57.93    1.96 
  10  -7   3   56.59    2.17 
 -10  -7  -3   56.29    2.23 
  10  -7   3   56.62    2.32 
 -10   7   3   58.89    2.51 
  10   7  -3   57.34    2.14 
  10   7   3   54.14    1.93 
 -10   7  -3   55.52    2.52 
 -10   7  -3   57.64    2.35 
 -10  -7   3   54.54    2.32 
  10  -7  -3   60.44    2.76 
  10   7   3   56.63    2.17 
 -11  -7  -3    1.07    0.24 
  11   7  -3    1.06    0.25 
  11  -7   3    1.16    0.34 
  11  -7   3    0.94    0.25 
 -11   7   3    0.97    0.40 
  11   7   3    0.96    0.32 
 -11  -7   3    0.66    0.25 
 -11   7  -3    0.93    0.42 
 -11   7  -3    1.39    0.39 
  12  -7   3    2.66    0.58 
  12   7  -3    2.37    0.41 
 -12  -7  -3    2.62    0.37 
  12  -7   3    2.16    0.37 
 -12   7   3    2.99    0.56 
 -12   7  -3    2.87    0.52 
 -12  -7   3    2.53    0.42 
 -12   7  -3    2.86    0.55 
  12  -7  -3    3.95    0.69 
  12   7   3    2.42    0.53 
  13  -7   3    0.55    0.48 
 -13  -7  -3    0.45    0.27 
  13  -7   3    0.00    0.31 
 -13   7   3    0.91    0.45 
  13   7  -3   -0.25    0.34 
 -13   7  -3    0.17    0.44 
 -13  -7   3    0.02    0.30 
  13   7   3    0.34    0.43 
  13  -7  -3    0.72    0.60 
  14   7  -3    1.09    0.41 
  14  -7   3    1.47    0.60 
 -14   7   3    0.68    0.49 
  14  -7   3    1.72    0.37 
  14   7  -3    1.79    0.64 
 -14  -7  -3    1.43    0.34 
 -14  -7   3    0.97    0.38 
  14  -7  -3    1.62    0.67 
  14   7   3    1.82    0.52 
 -14   7  -3    1.23    0.48 
 -15   7   3    3.10    0.60 
  15   7  -3    2.31    0.48 
 -15  -7  -3    2.48    0.47 
  15  -7   3    4.43    0.97 
  15   7  -3    3.30    0.78 
  15  -7  -3    2.61    0.78 
  15   7   3    4.51    0.85 
 -15   7  -3    2.54    0.71 
 -15  -7   3    3.33    0.50 
  16   7  -3    7.68    1.30 
  16  -7   3    8.54    1.31 
 -16  -7  -3    5.63    0.60 
  16   7  -3    6.97    0.79 
 -16   7   3    8.41    0.84 
 -16   7  -3    6.13    0.81 
 -16  -7   3    5.23    0.67 
  16   7   3    8.61    1.07 
   0   8   3    7.26    0.44 
   0  -8  -3    7.71    0.38 
   0   8  -3    7.62    0.45 
   0  -8   3    6.72    0.46 
   0   8   3    6.71    0.45 
   0   8  -3    5.92    0.46 
   1   8  -3   25.65    1.03 
  -1  -8  -3   27.30    0.94 
  -1   8   3   24.87    1.10 
  -1   8   3   25.21    1.11 
   1   8  -3   24.45    1.13 
   1  -8   3   25.77    1.13 
  -1  -8   3   25.25    1.11 
   1  -8  -3   25.44    1.02 
  -1   8  -3   24.90    1.08 
   1   8   3   25.37    1.10 
   1   8   3   25.33    1.00 
  -1   8  -3   25.68    1.16 
   2  -8   3   12.36    0.68 
   2  -8   3   13.13    0.68 
   2   8  -3   12.71    0.69 
  -2   8   3   12.26    0.72 
  -2   8   3   11.93    0.69 
   2  -8  -3   12.03    0.62 
  -2  -8   3   12.51    0.65 
  -2   8  -3   12.85    0.69 
  -2   8  -3   11.88    0.68 
   2   8   3   12.69    0.54 
   2   8   3   12.07    0.64 
   3  -8   3    0.90    0.21 
   3   8  -3    0.88    0.21 
   3  -8   3    0.75    0.15 
  -3   8   3    0.76    0.20 
  -3   8   3    0.72    0.16 
   3   8   3    0.75    0.13 
  -3   8  -3    0.80    0.18 
   3   8   3    0.95    0.18 
  -3   8  -3    0.69    0.18 
   3  -8  -3    0.47    0.16 
  -3  -8   3    0.72    0.16 
   4   8  -3   38.33    1.56 
   4  -8   3   38.80    1.52 
  -4   8   3   38.65    1.84 
   4  -8   3   39.46    1.58 
  -4   8   3   39.95    1.57 
  -4  -8   3   38.72    1.46 
  -4   8  -3   38.05    1.58 
   4   8   3   37.08    1.47 
  -4   8  -3   37.56    1.64 
   4  -8  -3   37.73    1.58 
   5   8  -3    1.49    0.23 
   5  -8   3    1.41    0.24 
  -5   8   3    1.58    0.30 
  -5   8   3    1.42    0.24 
   5  -8   3    1.27    0.23 
  -5   8  -3    1.14    0.25 
  -5  -8   3    1.25    0.20 
  -5  -8   3    1.30    0.18 
   5  -8  -3    1.27    0.28 
  -5   8  -3    1.50    0.25 
  -6   8   3    3.63    0.38 
   6  -8   3    3.92    0.35 
  -6   8   3    3.29    0.46 
  -6   8   3    3.68    0.40 
   6   8  -3    3.97    0.35 
   6  -8   3    3.53    0.35 
  -6   8   3    3.77    0.35 
  -6   8  -3    4.75    0.37 
  -6   8  -3    3.50    0.43 
   6  -8  -3    4.24    0.41 
  -6   8  -3    4.46    0.37 
   6   8   3    4.58    0.31 
  -6  -8   3    4.03    0.34 
  -7   8   3   12.33    0.74 
   7   8  -3   12.33    0.68 
  -7   8   3   11.94    0.76 
   7  -8   3   12.73    0.76 
   7  -8   3   12.36    0.72 
  -7   8   3   10.98    0.81 
  -7   8   3   12.44    0.68 
  -7   8  -3   12.27    0.71 
  -7  -8   3   11.45    0.68 
  -7   8  -3   12.17    0.85 
   7   8   3   12.86    0.60 
   7  -8  -3   13.17    0.80 
  -7   8  -3   13.30    0.68 
  -8   8   3    9.92    0.62 
  -8   8   3    9.16    0.70 
   8   8  -3    9.95    0.59 
  -8   8   3    9.82    0.58 
   8  -8   3    9.72    0.66 
   8  -8   3   10.20    0.64 
  -8  -8   3    9.52    0.63 
   8  -8  -3   10.87    0.75 
  -8   8  -3    9.75    0.64 
  -8   8  -3    9.72    0.76 
  -8   8  -3   10.23    0.56 
   8   8   3    9.99    0.50 
   9  -8   3    3.27    0.34 
   9   8  -3    2.23    0.33 
  -9   8   3    2.80    0.30 
  -9   8   3    2.98    0.44 
   9  -8   3    2.31    0.45 
  -9   8   3    2.51    0.36 
  -9   8  -3    2.77    0.27 
  -9  -8   3    2.99    0.34 
   9  -8  -3    3.73    0.50 
   9   8   3    3.19    0.36 
  -9   8  -3    2.00    0.36 
   9   8   3    2.58    0.28 
  -9   8  -3    2.51    0.42 
  10   8  -3   17.37    0.86 
  10  -8   3   17.01    0.95 
 -10   8   3   15.85    0.73 
 -10  -8  -3   16.83    0.90 
 -10   8   3   15.00    1.01 
 -10   8   3   16.73    0.78 
  10  -8   3   15.78    0.88 
  10   8   3   15.80    0.85 
 -10   8  -3   16.37    0.97 
 -10  -8   3   15.41    0.93 
 -10   8  -3   16.15    1.07 
  10   8   3   16.80    0.71 
 -11  -8  -3   13.42    0.81 
  11  -8   3   14.66    1.21 
  11  -8   3   13.29    0.78 
  11   8  -3   12.15    0.74 
 -11   8   3   10.91    0.89 
 -11   8  -3   13.42    0.89 
  11   8   3   13.54    0.62 
 -11  -8   3   13.51    0.86 
  11   8   3   12.19    0.77 
 -11   8  -3   12.86    0.98 
 -12  -8  -3    5.17    0.49 
  12  -8   3    5.97    0.66 
  12  -8   3    4.66    0.49 
 -12   8   3    4.36    0.59 
  12   8  -3    5.65    0.52 
  12   8   3    5.03    0.58 
 -12  -8   3    5.12    0.54 
 -12   8  -3    4.61    0.79 
  12   8   3    6.54    0.41 
 -12   8  -3    5.77    0.61 
  13  -8   3   -0.25    0.34 
 -13   8   3    0.87    0.45 
 -13  -8  -3   -0.08    0.27 
  13  -8   3    0.56    0.54 
  13   8  -3    0.41    0.37 
  13  -8  -3    0.27    0.63 
 -13   8  -3    0.40    0.49 
 -13   8  -3    1.04    0.66 
  13   8   3    0.20    0.25 
 -13  -8   3    0.56    0.35 
  13   8   3   -0.14    0.44 
 -14  -8  -3    8.55    0.66 
  14   8  -3    9.83    1.08 
  14   8  -3    8.01    0.73 
  14  -8   3    8.72    0.72 
  14  -8   3    7.90    0.93 
 -14   8   3    8.66    0.85 
 -14   8  -3    9.19    0.82 
  14  -8  -3   10.62    1.07 
 -14  -8   3    7.98    0.73 
  14   8   3    8.13    0.85 
  15   8  -3    0.08    0.50 
  15  -8   3    1.26    0.51 
  15   8  -3    1.81    0.80 
  15  -8   3    1.16    0.67 
 -15   8   3    0.67    0.54 
 -15  -8  -3    0.58    0.32 
 -15   8  -3    0.97    0.54 
 -15  -8   3    0.24    0.36 
  15  -8  -3    0.20    0.93 
 -16   8   3    1.69    0.59 
  16   8  -3    1.53    0.97 
  16   8   3    2.34    0.77 
 -16   8  -3    1.38    0.58 
 -16  -8   3    1.27    0.73 
   0   9  -3    0.11    0.13 
   0  -9  -3    0.15    0.10 
   0   9  -3    0.02    0.15 
   0   9   3    0.16    0.14 
   0  -9   3    0.11    0.13 
  -1  -9  -3    3.80    0.23 
   1  -9   3    2.86    0.31 
  -1   9   3    3.37    0.30 
   1   9  -3    3.76    0.30 
   1   9  -3    3.07    0.32 
  -1   9   3    3.27    0.32 
   1   9   3    3.13    0.29 
  -1   9  -3    2.79    0.31 
  -1  -9   3    3.10    0.30 
  -1   9  -3    2.73    0.29 
   1  -9  -3    3.97    0.27 
   1   9   3    3.12    0.27 
   2  -9   3   38.06    1.57 
  -2   9   3   36.44    1.55 
   2   9  -3   37.28    1.42 
   2  -9   3   39.89    1.48 
  -2   9   3   36.70    1.56 
   2   9  -3   37.42    1.58 
   2   9   3   37.92    1.37 
   2  -9  -3   37.00    1.45 
  -2   9  -3   38.63    1.56 
  -2  -9   3   37.61    1.51 
   2   9   3   36.93    1.51 
  -3   9   3   18.20    0.93 
  -3   9   3   17.85    0.97 
   3  -9   3   18.95    0.95 
   3  -9   3   19.18    0.87 
   3   9  -3   18.46    0.93 
  -3   9  -3   18.06    0.95 
   3   9   3   19.22    0.75 
  -3  -9   3   18.46    0.87 
  -3   9  -3   19.37    0.97 
   3   9   3   18.10    0.87 
   3  -9  -3   18.95    0.89 
   4  -9   3    6.15    0.43 
  -4   9   3    6.34    0.46 
  -4   9   3    6.05    0.52 
   4   9  -3    6.44    0.45 
   4  -9   3    6.23    0.48 
  -4  -9   3    6.40    0.41 
   4   9   3    6.43    0.41 
  -4   9  -3    5.58    0.48 
  -4   9  -3    6.07    0.47 
   4  -9  -3    6.16    0.45 
   5   9  -3    5.37    0.44 
  -5   9   3    5.77    0.43 
  -5   9   3    5.60    0.52 
   5  -9   3    5.98    0.43 
   5  -9   3    5.96    0.47 
  -5   9  -3    5.42    0.49 
   5  -9  -3    5.45    0.46 
  -5  -9   3    5.42    0.36 
   5   9   3    5.55    0.39 
  -5   9  -3    5.51    0.43 
  -6   9   3   95.01    3.52 
   6  -9   3   95.74    3.44 
  -6   9   3   97.17    3.41 
  -6   9   3   94.47    3.66 
   6  -9   3   98.25    3.42 
  -6   9   3   96.33    3.49 
   6   9  -3   95.83    3.40 
  -6   9  -3   95.37    3.38 
   6  -9  -3   98.21    3.53 
  -6   9  -3   98.29    3.43 
   6   9   3   95.12    3.28 
   7  -9   3    7.24    0.53 
   7   9  -3    6.38    0.50 
  -7   9   3    6.74    0.50 
  -7   9   3    6.99    0.54 
   7  -9   3    7.30    0.53 
  -7   9   3    7.21    0.55 
  -7   9   3    6.95    0.64 
   7  -9  -3    8.06    0.59 
   7   9   3    7.54    0.45 
  -7   9  -3    7.85    0.51 
  -7   9  -3    7.85    0.67 
  -7  -9   3    7.36    0.50 
  -7   9  -3    7.18    0.52 
  -8   9   3   55.87    2.06 
   8   9  -3   53.56    2.07 
   8  -9   3   52.98    2.12 
  -8   9   3   51.48    2.38 
   8  -9   3   45.88    2.59 
  -8   9   3   55.58    2.13 
  -8   9   3   52.76    2.25 
   8  -9  -3   49.22    2.73 
   8   9   3   51.96    1.92 
  -8  -9   3   53.87    2.11 
  -8   9  -3   52.48    2.38 
  -8   9  -3   55.19    2.16 
  -8   9  -3   55.62    2.03 
  -9   9   3   28.18    1.25 
  -9   9   3   28.04    1.21 
  -9   9   3   26.73    1.42 
   9  -9   3   28.60    1.31 
   9  -9   3   28.08    1.34 
   9   9  -3   28.43    1.26 
  -9   9  -3   28.33    1.15 
  -9   9  -3   27.59    1.34 
   9  -9  -3   27.13    1.45 
  -9   9  -3   25.68    1.51 
   9   9   3   28.42    1.13 
  -9   9  -3   27.00    1.12 
  -9  -9   3   28.14    1.34 
  10  -9   3   20.80    1.05 
  10   9  -3   20.43    1.01 
 -10   9   3   19.43    1.20 
  10  -9   3   20.80    1.11 
 -10   9   3   19.55    0.96 
 -10   9   3   21.32    0.93 
  10   9   3   19.72    0.97 
 -10   9  -3   16.36    1.64 
  10   9   3   20.74    0.89 
 -10  -9   3   21.25    1.12 
 -10   9  -3   19.26    1.11 
  11  -9   3   14.57    0.96 
 -11   9   3   15.70    0.71 
  11  -9   3   15.68    0.88 
  11   9  -3   16.12    0.85 
 -11   9   3   13.95    1.04 
 -11   9   3   15.91    0.69 
  11   9   3   14.46    0.74 
 -11  -9   3   15.82    0.93 
 -11   9  -3   13.89    0.94 
  11   9   3   15.95    0.86 
 -11   9  -3   14.61    1.10 
  12  -9   3    1.53    0.49 
 -12   9   3    2.05    0.48 
  12  -9   3    2.37    0.38 
  12   9  -3    2.94    0.48 
  12   9   3    2.59    0.37 
 -12  -9   3    2.30    0.36 
 -12   9  -3    1.48    0.61 
  12   9   3    2.93    0.56 
 -12   9  -3    2.15    0.47 
  13  -9   3    0.10    0.37 
  13   9  -3    0.93    0.41 
 -13   9   3    1.19    0.52 
  13  -9   3    0.20    0.53 
 -13  -9   3    0.40    0.32 
  13  -9  -3    0.56    0.62 
 -13   9  -3    0.08    0.52 
  13   9   3    0.44    0.46 
  13   9   3   -0.02    0.30 
 -13   9  -3    0.15    0.63 
  14   9  -3    0.36    0.48 
  14  -9   3    0.44    0.67 
  14  -9   3    0.17    0.52 
 -14   9   3    0.04    0.52 
  14  -9  -3    1.00    0.72 
  14   9   3    0.76    0.54 
 -14   9  -3   -0.16    0.56 
  14   9   3    0.16    0.33 
 -14  -9   3   -0.27    0.31 
  15   9  -3    0.13    0.56 
 -15   9   3   -0.13    0.55 
  15   9  -3    0.28    0.87 
  15  -9   3   -0.29    0.85 
 -15   9  -3   -0.06    0.60 
  15   9   3    0.50    0.66 
 -15  -9   3    0.88    0.42 
  16  -9   3   15.99    1.08 
 -16   9  -3   14.16    1.10 
 -16  -9   3   13.30    1.02 
  16   9   3   16.87    1.23 
   0  10  -3   11.28    0.71 
   0  10  -3   12.39    0.66 
   0 -10  -3   12.67    0.57 
   0  10   3   12.33    0.70 
   0 -10   3   12.05    0.70 
   0  10   3   11.96    0.65 
   1  10  -3    1.34    0.27 
   1  10  -3    1.27    0.25 
  -1  10   3    1.16    0.25 
   1 -10   3    1.34    0.26 
  -1  10   3    1.09    0.24 
  -1  10  -3    1.17    0.23 
   1 -10  -3    1.30    0.20 
  -1 -10   3    1.42    0.22 
  -1  10  -3    1.35    0.23 
   1  10   3    1.21    0.20 
   1  10   3    1.16    0.21 
   2 -10   3   16.94    0.90 
  -2  10   3   16.87    0.89 
   2 -10   3   17.23    0.80 
   2  10  -3   16.38    0.90 
  -2  10   3   16.58    0.88 
   2  10  -3   17.30    0.79 
  -2 -10   3   17.35    0.86 
   2  10   3   17.18    0.86 
  -2  10  -3   17.40    0.92 
  -2  10  -3   16.76    0.88 
   2  10   3   17.03    0.75 
   2 -10  -3   17.26    0.80 
   3 -10   3   57.17    2.12 
   3  10  -3   57.34    2.24 
  -3  10   3   57.82    2.23 
   3 -10   3   56.38    2.23 
  -3  10   3   58.19    2.30 
   3  10   3   56.00    2.15 
  -3  10  -3   57.28    2.27 
   3 -10  -3   58.57    2.15 
  -3  10  -3   57.61    2.27 
  -3 -10   3   57.60    2.14 
   3  10   3   57.90    1.97 
   4 -10   3   50.42    2.01 
   4  10  -3   51.67    2.02 
  -4  10   3   50.26    2.01 
  -4  10   3   49.37    2.11 
   4 -10   3   51.56    1.93 
   4  10   3   48.55    1.91 
  -4  10  -3   50.32    2.04 
   4 -10  -3   49.29    1.95 
  -4 -10   3   49.40    1.88 
   4  10   3   50.44    1.71 
  -4  10  -3   49.92    2.09 
   5 -10   3    7.43    0.50 
  -5  10   3    6.30    0.56 
   5  10  -3    6.38    0.50 
   5 -10   3    7.05    0.53 
  -5  10   3    6.26    0.51 
  -5  10  -3    5.91    0.54 
  -5 -10   3    6.93    0.42 
   5 -10  -3    7.79    0.52 
   5  10   3    5.83    0.44 
  -5  10  -3    6.46    0.50 
   6 -10   3   19.36    0.94 
   6  10  -3   18.63    0.96 
  -6  10   3   18.50    0.96 
   6 -10   3   19.23    1.00 
  -6  10   3   17.94    1.10 
  -6  10  -3   19.78    0.99 
  -6  10  -3   18.38    1.10 
   6  10   3   19.07    0.89 
   6 -10  -3   18.24    0.98 
   7 -10   3   22.16    1.14 
   7  10  -3   21.95    1.08 
  -7  10   3   21.75    1.26 
   7 -10   3   22.51    1.13 
  -7  10   3   21.86    1.17 
  -7  10   3   22.26    1.14 
  -7  10   3   21.95    1.09 
  -7  10  -3   24.13    1.10 
   7  10   3   22.04    0.99 
  -7  10  -3   21.73    1.27 
  -7  10  -3   22.07    1.07 
   7 -10  -3   23.10    1.19 
  -8  10   3    3.70    0.39 
   8 -10   3    2.93    0.46 
  -8  10   3    3.63    0.49 
  -8  10   3    2.65    0.54 
  -8  10   3    2.97    0.46 
   8 -10   3    3.76    0.41 
   8  10  -3    2.46    0.38 
  -8  10  -3    2.72    0.56 
   8 -10  -3    2.67    0.49 
  -8  10  -3    4.11    0.41 
  -8 -10   3    3.86    0.36 
  -8  10  -3    3.21    0.46 
   9 -10   3    8.91    0.65 
   9 -10   3    8.62    0.67 
   9  10  -3    8.92    0.62 
  -9  10   3    8.24    0.71 
  -9  10   3    8.78    0.79 
  -9  10   3    8.64    0.57 
  -9  10   3    9.43    0.65 
  -9  10  -3    8.77    0.56 
   9  10   3    9.82    0.56 
   9 -10  -3    8.43    0.75 
  -9  10  -3    8.37    0.67 
  -9  10  -3    8.24    0.78 
  -9 -10   3    9.11    0.60 
 -10  10   3    6.90    0.69 
  10 -10   3    7.23    0.60 
  10  10  -3    8.42    0.60 
 -10  10   3    5.97    0.59 
  10 -10   3    7.77    0.70 
 -10  10   3    8.14    0.52 
  10  10   3    8.74    0.54 
 -10 -10   3    7.83    0.58 
 -10  10  -3    7.66    0.48 
  10  10   3    7.77    0.63 
 -10  10  -3    8.09    0.81 
 -10  10  -3    6.74    0.46 
 -10  10  -3    6.84    0.66 
  11 -10   3   18.63    1.05 
  11  10  -3   20.55    1.05 
  11 -10   3   20.18    1.14 
 -11  10   3   20.79    0.90 
 -11  10   3   19.22    0.91 
 -11  10   3   20.14    1.25 
  11  10   3   17.64    0.98 
 -11  10  -3   19.05    1.27 
  11  10   3   19.64    0.92 
 -11  10  -3   20.09    1.15 
 -11 -10   3   19.31    1.10 
 -12  10   3    2.12    0.54 
  12  10  -3    1.72    0.43 
  12 -10   3    1.48    0.37 
 -12 -10   3    2.08    0.37 
  12 -10  -3    1.83    0.57 
 -12  10  -3    1.98    0.63 
 -12  10  -3    2.69    0.49 
  12  10   3    1.64    0.42 
  12  10   3    2.46    0.43 
 -13  10   3    0.94    0.50 
  13 -10   3   -0.03    0.49 
  13 -10   3    1.39    0.57 
  13  10  -3    1.40    0.46 
 -13  10  -3   -0.33    0.71 
  13 -10  -3    0.07    0.64 
  13  10   3   -0.11    0.34 
  13  10   3    0.40    0.50 
 -13 -10   3    0.43    0.30 
 -13  10  -3    0.69    0.51 
  14 -10   3   18.07    1.06 
 -14  10   3   14.79    1.12 
  14 -10   3   16.27    1.22 
  14  10  -3   17.77    1.04 
 -14  10  -3   16.78    1.42 
  14  10   3   16.24    1.05 
  14 -10  -3   15.77    1.32 
  14  10   3   14.50    0.85 
 -14  10  -3   15.84    1.11 
 -14 -10   3   15.29    1.02 
 -15  10   3    5.35    0.77 
  15  10  -3    3.14    0.95 
  15  10  -3    3.61    0.65 
  15  10   3    3.46    0.60 
  15  10   3    3.47    0.73 
 -15 -10   3    3.31    0.51 
 -15  10  -3    3.26    0.65 
   0  11   3    0.04    0.18 
   0 -11  -3    0.12    0.12 
   0  11  -3    0.02    0.20 
   0  11  -3   -0.23    0.16 
   0  11   3    0.15    0.18 
  -1  11   3   10.36    0.62 
   1  11  -3    9.63    0.58 
   1 -11   3    9.38    0.63 
   1  11  -3    9.57    0.64 
  -1  11   3    9.89    0.62 
  -1  11  -3    9.62    0.65 
   1 -11  -3   10.83    0.54 
  -1  11  -3   10.02    0.63 
  -1 -11   3   10.12    0.62 
   1  11   3   10.30    0.57 
   1  11   3    9.87    0.63 
   2  11  -3   16.20    0.90 
   2 -11   3   16.45    0.79 
   2 -11   3   15.96    0.89 
   2  11  -3   16.37    0.77 
  -2  11   3   15.88    0.88 
  -2  11   3   16.38    0.89 
  -2  11  -3   15.65    0.86 
   2  11   3   15.92    0.73 
   2 -11  -3   16.08    0.77 
  -2  11  -3   15.41    0.89 
  -2 -11   3   14.92    0.83 
   2  11   3   16.04    0.85 
   3 -11   3    1.90    0.30 
   3 -11   3    1.84    0.25 
  -3  11   3    2.17    0.32 
   3  11  -3    1.49    0.25 
   3  11  -3    1.57    0.30 
  -3  11   3    1.52    0.26 
   3  11   3    1.66    0.29 
   3 -11  -3    1.36    0.28 
   3  11   3    1.63    0.22 
  -3  11  -3    1.50    0.31 
  -3 -11   3    1.52    0.25 
  -3  11  -3    2.02    0.30 
  -4  11   3   57.57    2.25 
   4  11  -3   56.59    2.25 
  -4  11   3   54.82    2.34 
   4 -11   3   56.49    2.14 
   4 -11   3   56.90    2.26 
   4  11   3   56.77    1.94 
  -4 -11   3   56.94    2.12 
  -4  11  -3   56.33    2.34 
  -4  11  -3   55.59    2.27 
   4  11   3   58.03    2.19 
   4 -11  -3   55.79    2.17 
   5 -11   3   25.64    1.25 
   5  11  -3   25.03    1.23 
  -5  11   3   24.25    1.20 
  -5  11   3   23.71    1.33 
   5 -11   3   25.59    1.18 
   5  11   3   25.64    0.97 
  -5  11  -3   25.47    1.24 
   5 -11  -3   26.02    1.21 
  -5 -11   3   26.06    1.10 
   5  11   3   26.33    1.16 
  -5  11  -3   24.95    1.34 
   6 -11   3    1.81    0.34 
  -6  11   3    1.96    0.44 
   6 -11   3    2.03    0.32 
   6  11  -3    1.67    0.29 
  -6  11   3    1.61    0.26 
  -6  11  -3    1.98    0.36 
   6  11   3    2.06    0.33 
  -6  11  -3    1.68    0.33 
  -7  11   3    8.44    0.75 
   7  11  -3    8.05    0.60 
   7 -11   3    6.98    0.59 
  -7  11   3    7.99    0.64 
   7 -11   3    8.18    0.59 
  -7  11   3    7.44    0.60 
  -7  11   3    7.80    0.59 
  -7  11  -3    7.42    0.55 
   7  11   3    8.95    0.55 
   7 -11  -3    7.74    0.95 
  -7  11  -3    7.91    0.70 
  -7  11  -3    8.68    0.63 
  -8  11   3    8.87    0.81 
  -8  11   3   10.95    0.78 
   8  11  -3   10.04    0.69 
   8 -11   3    9.90    0.71 
  -8  11   3   10.14    0.67 
  -8  11   3    8.92    0.72 
  -8  11  -3    9.79    0.84 
  -8  11  -3   10.57    0.70 
  -8  11  -3   11.67    0.70 
   8  11   3   10.61    0.63 
   8 -11  -3   11.14    0.80 
  -9  11   3   40.82    2.03 
  -9  11   3   42.63    2.22 
   9 -11   3   42.70    1.90 
  -9  11   3   44.73    1.89 
   9  11  -3   43.74    1.87 
  -9  11   3   44.23    1.82 
   9 -11  -3   50.35    2.48 
  -9  11  -3   43.94    1.95 
  -9  11  -3   46.23    1.81 
   9  11   3   44.04    1.75 
  -9  11  -3   44.79    2.19 
 -10  11   3    6.80    0.66 
  10 -11   3    5.79    0.64 
 -10  11   3    5.40    0.60 
 -10  11   3    5.39    0.48 
  10 -11   3    6.01    0.55 
  10  11  -3    6.03    0.55 
 -10  11  -3    4.89    0.48 
 -10  11  -3    6.08    0.51 
  10  11   3    6.11    0.49 
 -10  11  -3    5.47    0.79 
 -10  11  -3    5.03    0.62 
 -11  11   3   10.60    0.84 
  11  11  -3   11.63    0.78 
 -11  11   3   11.50    0.66 
 -11  11   3   10.45    0.71 
  11 -11   3   11.42    0.87 
  11  11   3   11.23    0.73 
 -11 -11   3   10.37    0.73 
  11  11   3   11.27    0.66 
 -11  11  -3   10.60    0.82 
 -11  11  -3    9.58    1.03 
 -12  11   3    1.23    0.47 
  12 -11   3    1.49    0.54 
  12  11  -3    1.81    0.44 
  12 -11   3    2.84    0.56 
  12 -11  -3    0.70    0.63 
 -12  11  -3    2.07    0.75 
 -12  11  -3    1.85    0.53 
 -12 -11   3    2.25    0.37 
  12  11   3    1.34    0.38 
  12  11   3    1.57    0.48 
  13 -11   3    2.61    0.67 
 -13  11   3    2.91    0.55 
  13 -11   3    2.66    0.47 
  13  11  -3    3.58    0.71 
  13 -11  -3    3.45    0.74 
 -13  11  -3    1.19    0.76 
  13  11   3    3.27    0.72 
 -13 -11   3    2.61    0.41 
 -13  11  -3    3.40    0.64 
  13  11   3    2.56    0.54 
  14  11  -3   11.58    0.96 
  14 -11   3   12.17    1.22 
  14 -11   3   13.82    0.98 
 -14  11   3   10.67    1.00 
 -14  11  -3   10.56    0.97 
  14  11   3   10.12    0.78 
 -14  11  -3   12.77    1.36 
  14  11   3   12.09    0.96 
 -14 -11   3   10.55    0.80 
  15  11  -3    8.50    1.46 
 -15  11   3    8.84    0.96 
  15  11   3    9.90    0.80 
 -15  11  -3    9.45    0.95 
  15  11   3    9.89    1.06 
   0 -12  -3  197.35    6.06 
   0  12   3  190.28    6.36 
   0  12  -3  191.57    6.24 
   0  12  -3  182.11    6.39 
   0 -12   3  185.76    6.32 
   0  12   3  189.98    6.24 
   1  12  -3    3.13    0.42 
  -1  12   3    3.49    0.37 
   1  12  -3    3.65    0.36 
   1 -12   3    4.03    0.41 
  -1  12   3    4.33    0.43 
  -1  12  -3    3.15    0.42 
  -1 -12   3    3.93    0.39 
  -1  12  -3    3.89    0.39 
   1 -12  -3    4.40    0.33 
   1  12   3    4.79    0.41 
   1  12   3    4.09    0.36 
   2  12  -3    5.78    0.43 
   2  12  -3    5.30    0.50 
   2 -12   3    6.09    0.51 
  -2  12   3    6.35    0.52 
  -2  12   3    6.02    0.50 
   2  12   3    5.96    0.48 
   2  12   3    6.20    0.42 
  -2  12  -3    5.47    0.50 
  -2 -12   3    5.13    0.44 
   2 -12  -3    5.91    0.41 
  -2  12  -3    5.31    0.49 
   3  12  -3    6.85    0.45 
   3  12  -3    6.39    0.52 
  -3  12   3    6.37    0.55 
   3 -12   3    6.42    0.51 
   3 -12   3    6.93    0.47 
  -3  12   3    6.04    0.51 
  -3 -12   3    6.61    0.47 
  -3  12  -3    7.05    0.54 
   3  12   3    6.64    0.51 
   3  12   3    5.83    0.39 
  -3  12  -3    5.40    0.51 
   3 -12  -3    6.01    0.45 
  -4  12   3   21.51    1.17 
   4  12  -3   21.24    1.11 
   4  12  -3   22.20    0.97 
   4 -12   3   20.77    1.11 
   4 -12   3   21.72    1.02 
  -4  12   3   20.50    1.10 
  -4 -12   3   21.31    1.00 
   4 -12  -3   22.50    1.05 
   4  12   3   22.38    0.90 
  -4  12  -3   20.62    1.11 
  -4  12  -3   20.19    1.16 
   4  12   3   20.86    1.06 
  -5  12   3    1.11    0.35 
   5 -12   3    1.25    0.27 
  -5  12   3    1.40    0.31 
   5  12  -3    1.60    0.30 
   5 -12   3    1.58    0.31 
   5  12   3    1.22    0.27 
  -5  12  -3    0.91    0.35 
   5  12   3    1.43    0.21 
  -5  12  -3    1.25    0.27 
  -5 -12   3    1.51    0.25 
   6 -12   3    2.79    0.41 
  -6  12   3    2.42    0.41 
   6 -12   3    3.19    0.41 
  -6  12   3    1.89    0.38 
   6  12  -3    2.72    0.40 
  -6  12  -3    2.73    0.42 
  -6  12  -3    2.52    0.48 
   6  12   3    2.96    0.29 
   6  12   3    2.54    0.41 
   6 -12  -3    3.35    0.47 
  -7  12   3    2.57    0.50 
  -7  12   3    2.78    0.42 
   7  12  -3    2.35    0.44 
   7 -12   3    2.17    0.40 
   7 -12  -3    2.44    0.38 
   7  12   3    2.46    0.40 
  -7  12  -3    2.52    0.39 
  -7  12  -3    2.55    0.47 
  -8  12   3   64.56    2.59 
   8  12  -3   61.93    2.51 
  -8  12   3   65.05    2.51 
  -8  12   3   60.07    2.64 
  -8  12   3   59.41    3.14 
   8 -12   3   62.60    2.55 
   8 -12  -3   65.36    2.59 
  -8  12  -3   63.57    2.53 
   8  12   3   63.49    2.40 
  -8  12  -3   67.71    2.53 
  -8  12  -3   63.46    3.00 
  -9  12   3    7.47    0.72 
  -9  12   3    7.62    0.69 
  -9  12   3    7.11    0.59 
   9  12  -3    7.01    0.59 
  -9  12   3    7.03    0.79 
   9 -12   3    7.31    0.77 
  -9  12  -3    7.17    0.62 
   9  12   3    7.84    0.57 
  -9  12  -3    6.18    0.78 
  -9  12  -3    6.86    0.65 
 -10  12   3   19.15    1.19 
  10 -12   3   19.23    1.12 
  10  12  -3   21.79    1.09 
 -10  12   3   19.68    1.01 
  10 -12   3   16.95    1.19 
 -10  12   3   21.52    1.11 
 -10  12  -3   19.86    1.35 
  10  12   3   19.88    1.00 
  10 -12  -3   21.02    1.21 
 -10  12  -3   21.42    1.00 
 -10  12  -3   20.70    1.15 
 -10  12  -3   20.10    0.97 
  11 -12   3    0.27    0.37 
 -11  12   3    1.20    0.47 
  11 -12   3    0.86    0.48 
  11  12  -3    0.42    0.42 
 -11  12   3    0.38    0.46 
 -11  12   3    0.61    0.38 
  11 -12  -3    1.38    0.55 
  11  12   3    0.17    0.37 
 -11  12  -3    0.77    0.36 
 -11  12  -3    0.18    0.35 
 -11  12  -3    0.05    0.46 
 -11  12  -3   -0.18    0.67 
  12 -12   3    1.89    0.57 
 -12  12   3    1.80    0.57 
 -12  12   3    1.76    0.44 
  12 -12   3    1.88    0.43 
 -12  12   3    2.79    0.53 
  12 -12  -3    1.56    0.64 
 -12  12  -3    1.92    0.75 
 -12  12  -3    1.18    0.56 
  12  12   3    1.15    0.41 
 -13  12   3    2.47    0.61 
  13 -12   3    2.71    0.73 
  13 -12   3    2.52    0.52 
 -13  12  -3    2.15    0.58 
 -13  12  -3    1.01    0.95 
  13  12   3    2.95    0.61 
  14  12  -3   23.09    1.31 
 -14  12   3   20.84    1.37 
  14 -12   3   22.80    1.26 
 -14  12  -3   16.81    1.74 
 -14  12  -3   19.66    1.29 
  14  12   3   19.62    1.10 
  15 -12   3    5.67    0.97 
  15  12  -3    7.36    1.12 
  15  12   3    5.91    0.84 
   0  13  -3   -0.27    0.23 
   0  13   3   -0.11    0.24 
   0  13  -3    0.20    0.21 
   0 -13   3   -0.16    0.20 
   0 -13  -3   -0.03    0.16 
   1  13  -3   34.57    1.47 
  -1  13   3   35.06    1.57 
   1 -13   3   34.33    1.58 
  -1  13   3   34.93    1.55 
   1  13  -3   33.74    1.61 
  -1  13  -3   33.52    1.61 
   1 -13  -3   35.98    1.37 
   1  13   3   34.78    1.45 
  -1  13  -3   35.77    1.56 
  -1 -13   3   34.23    1.55 
   1  13   3   34.82    1.57 
   2 -13   3    0.27    0.20 
  -2  13   3    0.50    0.30 
  -2  13   3    0.27    0.26 
   2  13  -3    0.52    0.27 
  -2 -13   3    0.36    0.20 
   2 -13  -3    0.48    0.19 
  -2  13  -3    0.39    0.27 
   2  13   3    0.46    0.22 
   2  13   3    0.29    0.24 
  -2  13  -3    0.28    0.26 
  -3  13   3    2.96    0.44 
   3  13  -3    3.70    0.45 
   3 -13   3    4.51    0.38 
  -3  13   3    2.82    0.45 
   3 -13   3    4.18    0.43 
  -3  13  -3    3.38    0.45 
   3  13   3    4.47    0.35 
   3 -13  -3    4.46    0.39 
  -3  13  -3    3.41    0.46 
  -3 -13   3    4.01    0.40 
   3  13   3    3.14    0.42 
   4 -13   3    0.34    0.38 
  -4  13   3   -0.06    0.33 
   4  13  -3    0.58    0.20 
  -4  13   3   -0.22    0.26 
   4 -13   3    0.49    0.21 
   4  13  -3    0.18    0.28 
  -4 -13   3    0.17    0.21 
   4 -13  -3    0.46    0.23 
  -4  13  -3    0.13    0.31 
   4  13   3    0.31    0.26 
   4  13   3    0.43    0.19 
  -4  13  -3   -0.09    0.28 
  -5  13   3   13.15    0.91 
   5 -13   3   12.81    0.85 
   5 -13   3   12.00    0.72 
  -5  13   3   13.02    0.81 
   5  13  -3   11.83    0.80 
  -5 -13   3   12.54    0.69 
   5  13   3   12.93    0.75 
   5 -13  -3   12.71    0.76 
   5  13   3   13.30    0.62 
  -5  13  -3   12.52    0.81 
  -5  13  -3   10.56    0.84 
   6 -13   3    0.43    0.24 
   6 -13   3    0.53    0.27 
  -6  13   3    0.31    0.43 
  -6  13   3    0.38    0.31 
   6 -13  -3    0.42    0.31 
   6  13   3    0.26    0.20 
  -6  13  -3    0.07    0.32 
  -6  13  -3   -0.27    0.42 
   6  13   3    0.65    0.30 
  -7  13   3    9.13    0.67 
  -7  13   3   10.03    0.84 
   7  13  -3    9.07    0.68 
   7  13   3    9.93    0.64 
   7 -13  -3   10.56    0.72 
  -7  13  -3    8.91    0.70 
  -7  13  -3   10.38    1.01 
  -8  13   3   13.55    0.93 
  -8  13   3   11.90    0.80 
  -8  13   3   13.55    0.90 
   8  13  -3   12.29    0.81 
   8 -13   3   11.54    0.82 
  -8  13   3   12.65    1.01 
   8  13   3   12.44    0.78 
  -8  13  -3   13.17    0.82 
  -8  13  -3   14.31    1.03 
  -8  13  -3   12.98    0.83 
  -9  13   3    0.83    0.55 
   9  13  -3    0.33    0.37 
  -9  13   3    1.09    0.49 
  -9  13   3    0.20    0.42 
  -9  13   3   -0.07    0.39 
   9 -13   3    0.70    0.34 
  -9  13  -3    0.37    0.44 
  -9  13  -3    0.85    0.41 
   9  13   3    0.60    0.35 
  -9  13  -3   -0.48    0.63 
   9 -13  -3   -0.19    0.44 
  10 -13   3    1.45    0.40 
 -10  13   3    2.59    0.42 
 -10  13   3    1.49    0.63 
  10  13  -3    1.78    0.43 
  10 -13   3    2.32    0.48 
 -10  13   3    1.93    0.54 
 -10  13   3    1.51    0.48 
  10 -13  -3    2.12    0.54 
 -10  13  -3    1.84    0.48 
  10  13   3    2.19    0.41 
 -10  13  -3    1.77    0.62 
 -10  13  -3    1.64    0.44 
  11 -13   3    1.94    0.54 
 -11  13   3    0.90    0.44 
  11  13  -3    2.32    0.82 
 -11  13   3    1.28    0.54 
  11 -13   3    0.86    0.42 
 -11  13   3    1.05    0.51 
 -11  13  -3    0.96    0.56 
 -11  13  -3    1.41    0.71 
  11  13   3    1.69    0.47 
 -11  13  -3    1.36    0.45 
 -11  13  -3    1.22    0.42 
  11 -13  -3    0.53    0.59 
  12  13  -3    1.10    0.58 
  12 -13   3    0.80    0.49 
  12 -13   3    0.50    0.64 
 -12  13   3    0.68    0.47 
  12 -13  -3   -0.60    0.69 
  12  13   3    0.07    0.45 
 -12  13  -3    1.52    0.54 
 -12  13  -3    0.54    0.82 
  13  13  -3    0.97    0.66 
 -13  13   3    1.73    0.63 
 -13  13  -3    1.25    1.07 
  13  13   3    0.65    0.52 
 -13  13  -3    1.11    0.62 
 -14  13   3    2.33    0.64 
 -14  13  -3    2.87    0.70 
 -14  13  -3    3.00    1.21 
  14  13   3    4.04    0.81 
   0  14   3   90.48    3.31 
   0  14   3   92.99    3.44 
   0 -14   3   91.64    3.41 
   0  14  -3   91.57    3.32 
   0  14  -3   89.09    3.47 
   1 -14   3    2.02    0.43 
  -1  14   3    1.34    0.30 
   1  14  -3    1.30    0.31 
  -1  14   3    1.31    0.32 
   1  14  -3    1.64    0.34 
   1  14   3    1.67    0.32 
   1 -14  -3    1.49    0.22 
   1  14   3    1.55    0.31 
  -1 -14   3    1.82    0.30 
  -1  14  -3    1.20    0.29 
  -2  14   3   31.37    1.50 
   2 -14   3   29.77    1.45 
  -2  14   3   30.00    1.49 
   2  14  -3   30.10    1.51 
   2  14  -3   30.57    1.35 
   2 -14  -3   33.09    1.30 
   2  14   3   31.48    1.47 
  -2  14  -3   31.73    1.49 
   2  14   3   30.30    1.30 
  -2 -14   3   30.21    1.41 
  -2  14  -3   29.31    1.51 
   3  14  -3    8.72    0.67 
  -3  14   3    7.22    0.64 
   3  14  -3    7.07    0.58 
  -3  14   3    8.75    0.70 
   3 -14   3    8.14    0.62 
   3 -14   3    7.65    0.60 
  -3  14  -3    7.42    0.64 
   3  14   3    7.75    0.63 
  -3 -14   3    8.72    0.59 
  -3  14  -3    7.38    0.67 
   3 -14  -3    9.24    0.57 
   3  14   3    7.23    0.51 
   4  14  -3   46.49    2.04 
  -4  14   3   41.69    2.19 
   4 -14   3   46.61    1.86 
   4 -14   3   43.27    2.10 
   4  14  -3   47.86    1.82 
  -4  14   3   44.94    2.07 
   4  14   3   47.22    1.74 
   4  14   3   47.63    1.96 
  -4  14  -3   47.61    2.11 
  -4  14  -3   44.57    2.02 
   4 -14  -3   48.64    1.87 
  -4 -14   3   44.32    1.86 
   5 -14   3   50.39    2.02 
   5  14  -3   48.94    2.19 
   5 -14   3   44.90    2.29 
   5  14  -3   50.57    1.91 
  -5  14   3   49.70    2.27 
  -5  14  -3   50.45    2.18 
  -5  14  -3   49.89    2.27 
   5 -14  -3   50.86    2.03 
   5  14   3   51.59    2.09 
   5  14   3   50.57    1.82 
  -6  14   3   41.59    2.05 
   6 -14   3   43.24    1.90 
   6 -14   3   41.89    1.92 
   6  14  -3   40.19    2.09 
   6 -14  -3   43.02    1.81 
  -6  14  -3   44.24    1.95 
   6  14   3   44.73    1.86 
  -6  14  -3   41.61    2.29 
   7 -14   3    8.05    0.70 
  -7  14   3    8.89    0.89 
   7  14   3    9.65    0.68 
   7 -14  -3   10.79    1.06 
  -7  14  -3   10.02    0.86 
  -7  14  -3    9.19    0.75 
  -8  14   3   11.37    0.99 
  -8  14   3   15.77    0.97 
  -8  14   3   13.54    0.95 
   8  14  -3   11.02    0.92 
   8 -14   3   13.54    0.91 
  -8  14   3   12.74    1.06 
  -8  14  -3   12.94    0.84 
  -8  14  -3   15.77    1.07 
  -8  14  -3   13.89    0.91 
   8  14   3   14.49    0.85 
  -9  14   3    2.77    0.61 
  -9  14   3    2.33    0.45 
  -9  14   3    3.28    0.58 
  -9  14   3    3.23    0.60 
   9 -14   3    2.77    0.57 
   9 -14  -3    3.54    0.51 
  -9  14  -3    3.25    0.68 
   9  14   3    1.83    0.45 
  -9  14  -3    3.05    0.58 
  -9  14  -3    1.88    0.64 
 -10  14   3   20.95    1.35 
  10  14  -3   22.85    1.21 
  10 -14   3   21.23    1.24 
 -10  14   3   23.68    1.17 
 -10  14   3   20.90    1.48 
  10 -14   3   23.10    1.23 
 -10  14   3   24.56    1.32 
 -10  14  -3   21.23    1.24 
  10  14   3   20.67    1.18 
  10 -14  -3   20.75    1.27 
 -10  14  -3   23.47    1.18 
 -10  14  -3   19.84    1.45 
  11 -14   3    1.09    0.60 
 -11  14   3    1.54    0.55 
  11  14  -3    0.93    0.55 
  11 -14   3    1.41    0.49 
 -11  14  -3    1.07    0.82 
 -11  14  -3    0.40    0.52 
  11 -14  -3    1.38    0.66 
 -11  14  -3    1.19    0.58 
 -11  14  -3    0.21    0.54 
 -12  14   3    1.94    0.56 
 -12  14   3    1.56    0.65 
  12 -14   3    2.18    0.58 
 -12  14   3    0.99    0.57 
  12 -14   3    2.10    0.79 
 -12  14  -3    0.19    0.58 
  12 -14  -3    0.87    0.78 
  12  14   3    1.31    0.59 
 -12  14  -3    0.73    1.04 
 -12  14  -3    1.33    0.47 
 -13  14   3    1.21    0.67 
 -13  14   3    1.28    0.52 
  13  14  -3    1.81    1.21 
  13  14   3    1.70    0.62 
 -13  14  -3    3.88    1.15 
 -13  14  -3    3.00    0.67 
   0  15   3   -0.27    0.32 
   0  15   3   -0.06    0.31 
   0 -15   3    0.14    0.26 
   0  15  -3   -0.35    0.28 
  -1  15   3   14.88    0.88 
   1  15  -3   13.69    0.92 
   1 -15   3   14.20    1.03 
   1  15  -3   14.65    0.83 
   1  15   3   15.28    0.92 
  -1  15  -3   14.45    1.11 
   1 -15  -3   15.45    0.74 
  -1  15  -3   14.37    0.87 
  -1 -15   3   15.20    0.88 
   1  15   3   13.01    0.80 
  -2  15   3    0.79    0.34 
   2  15  -3    1.00    0.27 
   2  15  -3    0.43    0.35 
   2 -15   3    0.37    0.35 
  -2  15   3    0.93    0.38 
   2 -15  -3    1.59    0.33 
  -2 -15   3    1.12    0.28 
  -2  15  -3    0.88    0.35 
   2  15   3    1.07    0.35 
  -2  15  -3    1.34    0.33 
   2  15   3    1.10    0.29 
  -3  15   3    9.45    0.73 
   3  15  -3    9.37    0.71 
  -3  15   3    8.21    0.69 
   3 -15   3    8.14    0.66 
   3  15  -3    8.72    0.60 
  -3  15  -3    7.68    0.67 
  -3 -15   3    8.97    0.64 
   3  15   3    8.34    0.68 
   3 -15  -3    9.59    0.58 
  -3  15  -3    8.71    0.73 
   3  15   3    8.57    0.57 
  -4  15   3   14.67    0.91 
  -4  15   3   12.72    0.95 
   4 -15   3   14.01    0.80 
   4 -15   3   14.06    0.91 
   4  15  -3   15.11    0.97 
   4  15  -3   13.36    0.79 
   4  15   3   13.77    0.91 
  -4  15  -3   13.34    0.92 
   4 -15  -3   14.06    0.80 
   4  15   3   13.88    0.74 
  -4  15  -3   15.23    0.96 
  -4 -15   3   13.38    0.79 
   5 -15   3    8.00    0.68 
  -5  15   3    9.40    0.78 
   5  15  -3    9.99    0.63 
  -5  15   3    8.27    0.67 
   5  15  -3    7.94    0.70 
  -5  15  -3    8.84    0.79 
  -5  15  -3    8.63    0.72 
   5  15   3    9.01    0.68 
   5  15   3    9.12    0.54 
  -6  15   3   34.35    1.64 
   6  15  -3   32.87    1.41 
   6 -15   3   34.47    1.67 
   6  15  -3   31.69    1.63 
   6  15   3   35.14    1.60 
   6 -15  -3   35.26    1.56 
  -6  15  -3   32.08    1.75 
   6  15   3   34.21    1.34 
  -6  15  -3   32.60    1.63 
   7 -15   3    7.73    0.70 
  -7  15   3    8.65    0.72 
   7  15  -3    7.29    0.71 
  -7  15   3    6.83    0.86 
   7  15  -3    8.96    0.63 
   7 -15   3    7.82    0.65 
  -7  15  -3    9.18    0.79 
   7  15   3    8.30    0.71 
  -7  15  -3    8.98    0.84 
  -8  15   3    2.42    0.69 
   8 -15   3    2.64    0.46 
  -8  15   3    1.84    0.47 
  -8  15   3    1.77    0.56 
   8  15  -3    1.46    0.46 
   8 -15   3    2.80    0.59 
  -8  15  -3    2.09    0.44 
   8  15   3    2.02    0.45 
   8 -15  -3    1.94    0.47 
  -8  15  -3    1.95    0.64 
  -9  15   3    1.42    0.73 
   9 -15   3    0.71    0.42 
   9  15  -3    1.05    0.52 
  -9  15   3   -0.15    0.62 
  -9  15   3    1.40    0.50 
   9 -15   3    1.90    0.49 
  -9  15  -3    1.96    0.48 
   9 -15  -3    0.30    0.55 
  -9  15  -3    1.19    0.57 
  -9  15  -3    1.21    0.73 
  10 -15   3    1.85    0.49 
 -10  15   3   -0.22    0.90 
 -10  15   3    1.05    0.51 
  10  15  -3    1.99    0.55 
  10 -15   3    1.22    0.56 
 -10  15   3    2.09    0.54 
 -10  15   3    1.17    0.73 
 -10  15  -3    1.16    0.55 
  10  15   3    0.46    0.49 
 -10  15  -3   -0.35    0.79 
 -10  15  -3    1.01    0.57 
  10 -15  -3    0.45    0.62 
 -11  15   3    1.16    0.72 
  11 -15   3    1.68    0.67 
 -11  15   3    0.82    0.60 
  11 -15   3    0.30    0.54 
  11  15  -3    0.88    1.23 
 -11  15   3   -0.08    0.56 
  11  15   3   -0.27    0.55 
 -11  15  -3   -0.59    0.60 
  11 -15  -3   -0.50    0.72 
 -11  15  -3   -0.86    0.63 
 -11  15  -3    0.73    0.89 
 -11  15  -3    0.24    0.59 
 -12  15   3    1.80    0.60 
 -12  15   3    1.15    0.76 
 -12  15   3    1.74    0.65 
  12 -15   3    1.40    0.60 
  12  15  -3    2.91    0.76 
 -12  15  -3    1.93    0.67 
 -12  15  -3    2.43    0.62 
 -12  15  -3   -0.24    0.99 
  12  15   3    0.56    0.63 
  13  15  -3    6.88    1.18 
 -13  15   3    6.77    1.36 
  13 -15   3    7.48    1.05 
 -13  15   3    6.29    0.88 
  13  15   3    6.02    0.96 
 -13  15  -3    5.44    1.19 
 -13  15  -3    5.82    0.91 
   0  16   3    4.84    0.55 
   0 -16   3    5.67    0.55 
   0  16  -3    5.74    0.55 
   1 -16   3    2.66    0.41 
  -1  16   3    2.24    0.42 
   1  16  -3    2.39    0.40 
  -1  16  -3    2.44    0.41 
  -1 -16   3    3.09    0.56 
   1  16   3    2.12    0.44 
   1 -16  -3    2.32    0.36 
   1  16   3    1.76    0.36 
   2 -16   3    3.22    0.48 
   2  16  -3    1.91    0.34 
   2  16  -3    2.52    0.46 
  -2  16   3    2.14    0.44 
   2  16   3    2.47    0.40 
   2 -16  -3    1.99    0.37 
  -2  16  -3    3.25    0.54 
   2  16   3    1.76    0.42 
  -2 -16   3    2.90    0.44 
  -2  16  -3    2.05    0.40 
   3  16  -3   20.11    1.20 
  -3  16   3   23.04    1.24 
   3 -16   3   22.07    1.22 
   3  16  -3   20.52    1.04 
  -3 -16   3   20.51    1.10 
   3  16   3   20.77    1.04 
   3  16   3   21.92    1.18 
   3 -16  -3   20.49    1.06 
  -3  16  -3   23.63    1.38 
   4 -16   3   88.61    3.46 
  -4  16   3   87.46    3.54 
   4  16  -3   88.01    3.50 
   4  16  -3   86.88    3.20 
   4  16   3   88.02    3.13 
   4  16   3   89.24    3.43 
  -4  16  -3   88.49    3.56 
   4 -16  -3   91.25    3.24 
  -4  16  -3   95.86    3.85 
   5 -16   3    5.47    0.61 
   5  16  -3    5.41    0.57 
   5  16  -3    4.18    0.57 
   5 -16  -3    5.64    0.57 
   5  16   3    5.46    0.65 
  -5  16  -3    4.09    0.70 
   5  16   3    4.81    0.46 
  -5  16  -3    5.66    0.68 
   6 -16   3   22.34    1.17 
  -6  16   3   24.69    1.45 
   6 -16   3   24.28    1.33 
   6  16  -3   23.22    1.33 
   6  16  -3   24.35    1.14 
   6  16   3   24.31    1.04 
  -6  16  -3   24.96    1.34 
  -6  16  -3   22.93    1.43 
   6  16   3   23.14    1.27 
   7  16  -3   19.58    0.97 
   7  16  -3   19.20    1.42 
  -7  16   3   18.55    1.29 
   7 -16   3   17.86    1.12 
   7 -16   3   16.98    1.01 
  -7  16  -3   17.11    1.13 
   7  16   3   19.51    0.90 
  -7  16  -3   20.85    1.33 
   7 -16  -3   18.27    1.07 
   7  16   3   17.05    1.07 
   8 -16   3   10.70    0.87 
   8 -16   3    9.98    0.77 
   8  16  -3    7.71    1.02 
   8  16  -3   11.03    0.75 
  -8  16   3    9.96    1.05 
  -8  16   3   11.97    0.93 
   8  16   3    8.42    0.83 
  -8  16  -3   10.97    1.10 
  -8  16  -3   12.19    0.98 
   8 -16  -3   10.56    0.88 
  -8  16  -3    9.54    0.78 
   9  16  -3    0.48    0.56 
  -9  16   3    0.13    0.70 
   9 -16   3    1.11    0.54 
  -9  16   3    0.96    0.52 
   9 -16   3   -0.03    0.48 
  -9  16   3   -0.71    0.74 
  -9  16  -3   -0.25    0.82 
  -9  16  -3    0.76    0.51 
   9 -16  -3   -0.89    0.58 
  -9  16  -3    0.33    0.65 
   9  16   3   -0.37    0.52 
  10  16  -3    7.28    0.88 
 -10  16   3    6.06    1.19 
 -10  16   3    7.97    0.85 
  10 -16   3    5.35    0.87 
  10 -16   3    7.74    0.88 
 -10  16   3    7.98    0.79 
 -10  16   3    6.39    1.14 
 -10  16  -3    6.08    1.21 
  10  16   3    5.21    1.12 
  10 -16  -3    6.46    1.03 
 -10  16  -3    6.64    0.79 
 -11  16   3    6.65    0.86 
 -11  16   3    5.00    0.92 
  11  16  -3    5.81    1.00 
  11 -16   3    4.98    0.91 
 -11  16  -3    5.09    1.02 
 -11  16  -3    5.03    0.83 
 -11  16  -3    3.25    1.03 
 -11  16  -3    5.64    0.96 
  11  16   3    5.22    0.99 
 -12  16   3    3.50    0.70 
 -12  16   3    4.67    1.08 
 -12  16  -3    3.83    0.69 
 -12  16  -3    5.25    1.14 
 -12  16  -3    6.31    0.97 
 -12  16  -3    3.95    0.78 
  12  16   3    5.07    1.01 
   0  17  -3   -0.30    0.38 
   0 -17   3    0.34    0.33 
   0  17   3   -0.36    0.41 
  -1  17   3    2.97    0.60 
   1  17  -3    2.68    0.50 
   1 -17   3    2.31    0.50 
  -1  17  -3    1.98    0.73 
   1  17   3    0.71    0.49 
  -1 -17   3    1.53    0.34 
   2  17  -3    4.21    0.50 
   2 -17   3    3.93    0.56 
  -2  17   3    5.32    0.70 
   2  17  -3    4.25    0.70 
   2 -17  -3    4.44    0.46 
  -2  17  -3    4.31    0.60 
   2  17   3    3.76    0.54 
  -2 -17   3    4.54    0.54 
   2  17   3    4.56    0.75 
   3 -17   3    5.57    0.59 
   3  17  -3    4.16    0.71 
   3  17  -3    4.67    0.51 
  -3  17   3    4.87    0.73 
  -3  17   3    5.42    0.66 
  -3  17  -3    3.86    0.64 
   3  17   3    4.01    0.54 
   3 -17  -3    5.18    0.50 
  -3 -17   3    3.84    0.51 
   3  17   3    4.24    0.81 
   4 -17   3    7.86    0.74 
   4  17  -3    7.85    0.60 
  -4  17   3    6.51    1.40 
   4  17  -3    7.14    0.82 
  -4  17   3    8.46    0.81 
   4  17   3    8.02    0.90 
   4 -17  -3    8.93    0.64 
   4  17   3    9.43    0.63 
  -4  17  -3    8.04    0.81 
  -5  17   3   21.09    1.21 
  -5  17   3   21.56    1.32 
   5 -17   3   20.09    1.06 
   5  17  -3   20.34    1.05 
   5 -17   3   19.45    1.19 
   5  17  -3   19.68    1.23 
   5  17   3   20.63    1.33 
   5  17   3   21.49    1.01 
  -5  17  -3   21.18    1.31 
  -6  17   3    4.74    0.77 
   6 -17   3    6.15    0.70 
   6  17  -3    4.46    0.57 
   6  17  -3    6.18    0.65 
  -6  17   3    4.81    0.92 
   6 -17   3    5.08    0.65 
  -6  17  -3    5.15    0.87 
   6 -17  -3    5.66    0.68 
   6  17   3    4.09    0.70 
   6  17   3    4.61    0.53 
  -7  17   3   -0.36    0.73 
  -7  17   3   -0.36    0.56 
   7 -17   3    0.70    0.45 
   7  17  -3   -0.25    0.55 
   7 -17  -3    0.99    0.52 
   7  17   3   -0.22    0.51 
  -7  17  -3    1.37    0.68 
   8  17  -3    1.00    0.52 
  -8  17   3    0.77    0.73 
   8 -17   3    0.62    0.51 
  -8  17   3    0.77    0.48 
   8 -17   3    0.03    0.51 
  -8  17  -3    0.76    0.51 
   8 -17  -3    1.57    0.62 
   8  17   3    0.11    0.57 
  -9  17   3    1.41    0.65 
   9  17  -3    2.06    0.52 
  -9  17   3    1.74    0.88 
   9 -17   3    1.72    0.59 
   9  17  -3    0.95    0.65 
  -9  17   3    0.77    0.80 
   9 -17   3    2.04    0.58 
  -9  17   3    2.24    0.58 
   9 -17  -3    2.37    0.68 
  -9  17  -3    2.33    0.88 
  -9  17  -3    1.99    0.56 
  10  17  -3   10.91    1.11 
  10  17  -3   13.26    0.93 
 -10  17   3    8.67    1.37 
 -10  17   3    8.57    1.37 
 -10  17   3    8.34    1.21 
  10 -17   3   11.58    1.02 
 -10  17  -3   12.31    0.97 
  10  17   3   11.38    1.03 
  10 -17  -3   10.58    1.42 
 -10  17  -3   11.73    1.39 
 -10  17  -3   12.66    1.21 
 -11  17   3    2.49    1.00 
  11 -17   3    4.89    1.00 
 -11  17   3    4.53    0.86 
  11  17  -3    6.30    1.19 
 -11  17  -3    3.02    1.13 
 -11  17  -3    2.84    1.11 
  11  17   3    3.80    0.79 
 -11  17  -3    1.92    0.93 
 -11  17  -3    4.22    0.71 
   0 -18   3    1.69    0.38 
   0  18   3    1.55    0.50 
   0  18  -3    1.42    0.48 
  -1  18   3    3.67    0.59 
   1  18  -3    1.59    0.68 
   1 -18   3    3.55    0.59 
   1  18  -3    2.02    0.53 
   1  18   3    2.78    0.60 
  -1 -18   3    3.26    0.55 
  -1  18  -3    2.88    0.53 
  -1  18  -3    2.38    0.60 
   1  18   3    2.39    0.52 
  -2  18   3    9.53    0.82 
   2 -18   3    9.09    0.75 
  -2  18   3    8.65    0.82 
   2  18  -3    6.47    0.86 
   2 -18  -3    8.00    0.59 
   2  18   3    7.11    0.78 
   2  18   3    6.80    0.68 
  -2 -18   3    8.37    0.68 
  -2  18  -3    9.33    0.86 
  -2  18  -3    6.57    0.77 
   3  18  -3   -0.44    0.48 
  -3  18   3    0.14    0.53 
   3  18  -3   -0.83    0.53 
   3 -18   3    0.31    0.43 
  -3  18  -3   -0.31    0.51 
   3  18   3   -0.35    0.51 
  -3  18  -3    0.05    0.56 
   3 -18  -3    0.11    0.35 
   4 -18   3    1.91    0.44 
  -4  18   3   -0.07    0.66 
  -4  18   3    0.59    0.52 
   4  18  -3    0.05    0.56 
   4  18  -3    1.11    0.46 
   4  18   3    1.62    0.69 
   4  18   3    1.11    0.41 
  -4  18  -3    0.97    0.63 
  -4  18  -3    1.26    0.56 
   5  18  -3    1.05    0.54 
  -5  18   3    1.52    0.58 
   5 -18   3    1.45    0.46 
   5  18  -3    0.89    0.58 
  -5  18   3    0.95    0.69 
  -5  18  -3    0.03    0.64 
   5  18   3    0.65    0.55 
   5 -18  -3    0.92    0.43 
   5  18   3    1.56    0.41 
  -5  18  -3    1.18    0.60 
   6  18  -3    2.21    0.66 
   6 -18   3    2.18    0.50 
  -6  18   3    2.00    0.63 
  -6  18   3    1.95    0.71 
   6 -18  -3    2.24    0.50 
   6  18   3    2.30    0.58 
  -6  18  -3    2.15    0.70 
   7 -18   3    3.96    0.80 
   7  18  -3    3.84    0.57 
  -7  18   3    1.82    0.65 
   7 -18   3    3.06    0.53 
   7  18  -3    2.47    0.64 
  -7  18   3    3.92    0.85 
   7  18   3    3.58    0.70 
   7 -18  -3    4.24    0.80 
  -7  18  -3    5.25    1.04 
   7  18   3    3.02    0.46 
  -7  18  -3    3.15    0.78 
   8 -18   3   10.30    0.94 
  -8  18   3   10.18    1.07 
   8 -18   3   13.14    1.08 
   8  18  -3   15.55    0.95 
   8  18  -3   11.55    1.09 
  -8  18   3   15.02    1.34 
   8  18   3   11.73    1.05 
  -8  18  -3   14.51    1.35 
  -8  18  -3   14.60    1.26 
   8 -18  -3   12.50    1.04 
   9  18  -3    2.46    0.78 
   9 -18   3    3.36    0.66 
  -9  18   3    1.20    0.96 
  -9  18   3    1.04    0.92 
  -9  18  -3    3.71    0.89 
  -9  18  -3    2.12    0.66 
  -9  18  -3    1.43    0.97 
   9 -18  -3    3.11    0.75 
 -10  18   3    2.26    0.86 
  10 -18   3    1.60    0.69 
  10  18  -3    1.21    0.84 
 -10  18   3    2.29    1.13 
 -10  18   3    1.04    1.05 
  10  18  -3    1.62    0.61 
 -10  18  -3    3.43    0.77 
 -10  18  -3    1.89    1.64 
 -10  18  -3    2.03    1.10 
 -11  18   3    2.09    1.17 
 -11  18  -3    0.78    1.04 
   0  19   3   -0.85    0.55 
   0  19  -3   -0.75    0.59 
   0  19  -3   -0.34    0.52 
   0  19   3    0.60    0.58 
   0 -19   3   -0.22    0.42 
   1  19  -3    0.30    0.59 
  -1  19   3    1.16    0.59 
   1 -19   3    0.35    0.44 
  -1  19   3    0.05    0.58 
   1  19  -3    1.24    0.50 
  -1  19  -3   -0.06    0.57 
  -1 -19   3    0.49    0.42 
   1  19   3    0.59    0.54 
   1  19   3   -0.30    0.58 
  -1  19  -3    0.24    0.58 
   2  19  -3    2.04    0.66 
   2  19  -3    2.24    0.49 
  -2  19   3    4.38    0.87 
  -2  19   3    2.57    0.63 
   2  19   3    2.74    0.53 
   2  19   3    2.53    0.59 
  -2  19  -3    3.19    0.64 
  -2  19  -3    2.70    0.63 
   3  19  -3   -0.53    0.62 
  -3  19   3   -0.25    0.66 
  -3  19   3   -0.77    0.61 
   3 -19   3    0.82    0.47 
   3  19  -3    0.34    0.48 
  -3  19  -3   -0.61    0.63 
   3  19   3   -0.22    0.50 
   3  19   3    0.65    0.59 
  -3  19  -3   -0.06    0.64 
  -4  19   3   -0.20    0.73 
  -4  19   3    1.30    0.64 
   4  19  -3   -0.79    0.64 
   4  19  -3    0.04    0.47 
  -4  19  -3    0.42    0.67 
   4  19   3   -0.66    0.61 
  -4  19  -3    0.10    0.67 
   4  19   3   -0.09    0.49 
   4 -19  -3   -0.14    0.43 
  -5  19   3   27.46    1.60 
   5  19  -3   26.75    1.57 
  -5  19   3   28.61    1.54 
   5 -19   3   27.99    1.53 
   5  19  -3   26.24    1.27 
   5 -19  -3   22.81    1.25 
  -5  19  -3   28.01    1.56 
   5  19   3   25.57    1.61 
  -5  19  -3   26.98    1.55 
   5  19   3   27.09    1.26 
   6  19  -3   -0.30    0.68 
  -6  19   3    0.32    0.85 
   6  19  -3    0.12    0.49 
  -6  19   3   -0.76    0.71 
   6  19   3   -0.03    0.66 
   6 -19  -3   -0.09    0.52 
  -6  19  -3    0.55    0.87 
   6  19   3    0.00    0.49 
  -6  19  -3   -0.32    0.79 
   7 -19   3    0.87    0.60 
  -7  19   3    1.20    0.91 
  -7  19   3    2.02    0.78 
   7 -19   3    0.94    0.60 
   7  19  -3    0.57    0.74 
   7  19  -3    0.71    0.51 
  -7  19  -3    2.65    0.98 
  -7  19  -3    1.50    0.85 
   7 -19  -3    1.54    0.60 
   7  19   3    0.33    0.69 
   8 -19   3    3.44    0.67 
  -8  19   3    1.47    0.80 
   8  19  -3    3.32    0.80 
  -8  19   3    6.11    1.35 
  -8  19  -3    2.23    0.95 
   8  19   3    1.69    0.76 
  -8  19  -3    3.64    1.00 
  -9  19   3    1.57    0.68 
   9 -19   3    2.05    0.70 
   9  19  -3    1.91    0.70 
  -9  19   3   -0.59    1.04 
  -9  19   3   -0.01    1.06 
  -9  19   3    0.95    0.96 
  -9  19  -3   -1.33    1.10 
  -9  19  -3    0.95    0.64 
   9  19   3    0.28    0.83 
   0  20  -3   -0.12    0.58 
   0  20  -3    0.38    0.67 
   0  20   3    0.24    0.66 
   0  20   3    0.46    0.65 
  -1  20   3   20.35    1.37 
  -1  20   3   23.50    1.36 
   1 -20   3   22.87    1.30 
   1  20  -3   22.25    1.22 
   1  20  -3   21.10    1.32 
  -1  20  -3   21.65    1.40 
   1  20   3   22.97    1.26 
  -1  20  -3   20.49    1.27 
   1  20   3   20.12    1.35 
  -2  20   3    4.33    0.76 
   2  20  -3    3.45    0.71 
  -2  20   3    4.34    0.74 
   2 -20   3    3.84    0.58 
   2  20  -3    3.48    0.74 
  -2  20  -3    4.15    0.74 
   2  20   3    4.25    0.64 
  -2  20  -3    3.87    0.75 
   2  20   3    2.78    0.70 
   3  20  -3    6.38    0.76 
   3 -20   3    4.92    0.78 
   3  20  -3    5.80    1.03 
  -3  20   3    5.65    0.83 
  -3  20  -3    5.84    1.11 
   3  20   3    4.61    0.79 
   3  20   3    5.44    0.76 
  -3  20  -3    5.31    0.96 
   4 -20   3    6.41    0.85 
  -4  20   3    7.37    1.08 
   4  20  -3    8.04    1.06 
  -4  20   3    8.22    1.11 
   4  20  -3    7.13    0.76 
   4 -20  -3    6.17    0.75 
   4  20   3    6.21    0.80 
  -4  20  -3    6.22    1.05 
  -4  20  -3    6.05    1.13 
   4  20   3    5.89    1.02 
  -5  20   3    8.98    1.15 
  -5  20   3    9.83    1.25 
   5  20  -3    7.93    0.77 
   5  20  -3    7.07    1.11 
   5 -20   3    6.73    0.90 
  -5  20  -3    6.59    1.15 
   5  20   3    6.51    0.80 
  -5  20  -3    8.06    1.23 
   5  20   3    5.73    1.08 
   5 -20  -3    6.23    0.80 
   6  20  -3    1.59    0.79 
   6 -20   3    1.95    0.64 
  -6  20   3    0.55    0.97 
   6  20   3   -0.28    0.57 
   6  20   3    0.88    0.77 
  -6  20  -3    1.48    0.92 
   6 -20  -3   -0.43    0.60 
  -6  20  -3    1.28    1.00 
   7 -20   3   -0.58    0.65 
  -7  20   3    0.41    0.87 
   7  20  -3    0.56    0.60 
   7  20  -3    0.87    0.89 
  -7  20   3    1.84    1.02 
   7  20   3    0.94    0.85 
   7 -20  -3   -0.04    0.68 
  -7  20  -3    1.05    1.02 
  -7  20  -3    1.54    1.01 
  -8  20   3    0.79    0.95 
   8 -20   3    0.33    0.70 
  -8  20   3    1.44    1.19 
   8  20  -3    1.55    0.93 
  -8  20  -3    2.76    1.25 
   8  20   3   -1.26    0.90 
  -8  20  -3    2.27    1.10 
   0  21   3   -0.18    0.78 
   0  21  -3   -0.42    0.80 
   0  21   3    0.29    0.77 
   0  21  -3   -0.99    0.68 
   1  21  -3    3.03    0.82 
  -1  21   3    1.59    0.82 
   1 -21   3    2.20    0.60 
  -1  21   3    2.40    0.82 
   1  21  -3    2.98    0.72 
  -1  21  -3    2.73    0.75 
   1  21   3    1.10    0.82 
   1  21   3    2.96    1.18 
   2  21  -3    1.15    0.67 
  -2  21   3    0.03    0.87 
  -2  21   3    1.21    0.84 
   2  21  -3   -0.28    0.80 
   2 -21   3    0.09    0.60 
   2  21   3    1.13    0.82 
   2  21   3    0.92    0.70 
  -2  21  -3   -0.51    0.80 
  -2  21  -3    0.17    0.88 
   3 -21   3    1.69    0.62 
   3  21  -3    4.04    0.84 
  -3  21   3    3.51    0.86 
   3  21  -3    2.92    0.67 
   3  21   3    2.82    0.69 
  -3  21  -3    1.33    0.80 
  -3  21  -3    1.58    0.88 
   3  21   3    2.35    0.82 
  -4  21   3    4.54    0.94 
   4 -21   3    4.12    0.70 
   4  21  -3    3.56    0.87 
   4  21   3    5.58    0.90 
   4  21   3    4.33    0.87 
  -4  21  -3    3.59    0.97 
   4 -21  -3    3.38    0.61 
  -5  21   3    2.19    1.03 
   5  21  -3    1.65    0.68 
  -5  21   3    2.38    0.90 
   5 -21   3    0.82    0.65 
   5  21  -3    1.37    0.92 
   5  21   3    0.66    0.89 
  -5  21  -3    2.54    0.95 
  -5  21  -3    1.44    0.98 
   5 -21  -3    0.57    0.62 
   5  21   3    1.88    0.69 
   6  21  -3   21.90    1.73 
   6  21  -3   19.64    1.22 
   6 -21   3   18.37    1.34 
  -6  21   3   22.09    1.74 
  -6  21   3   22.56    1.60 
   6  21   3   21.64    1.25 
  -6  21  -3   25.79    1.73 
  -6  21  -3   25.04    1.72 
   6  21   3   21.87    1.55 
   7  21  -3    0.16    0.70 
  -7  21   3    0.88    1.03 
  -7  21   3    1.06    1.17 
   7  21   3    1.27    1.04 
  -7  21  -3    0.60    1.24 
  -7  21  -3    0.82    1.19 
   0  22   3   25.22    1.53 
   0  22  -3   24.41    1.42 
   1  22  -3    1.89    0.81 
  -1  22  -3    0.92    0.88 
   1  22   3    2.58    0.87 
   2  22  -3    0.15    0.78 
  -2  22   3   -0.47    0.96 
   2  22   3   -0.11    0.87 
  -2  22  -3    0.50    0.89 
  -3  22   3    1.16    1.06 
   3  22  -3   -0.91    0.77 
   3 -22   3   -0.04    0.72 
  -3  22  -3   -0.31    1.28 
  -4  22   3    1.06    1.16 
   4 -22   3   -0.30    1.22 
   4  22  -3   -0.36    0.79 
  -4  22  -3    0.47    1.01 
   4  22   3    0.32    0.79 
   5  22  -3    1.89    0.80 
  -5  22   3    0.55    1.23 
  -5  22  -3    0.87    1.13 
   5  22   3   -0.31    0.83 
   5 -22  -3    0.86    0.77 
   0  23  -3    0.60    1.02 
   0  23   3    3.56    1.08 
   0   0  -4  389.90   12.04 
   0   0   4  398.94   11.85 
   0   0   4  379.91   12.04 
   1   0  -4  372.23   11.54 
  -1   0  -4  364.98   11.49 
  -1   0   4  396.27   11.42 
  -1   0   4  354.42   11.53 
   1   0   4  374.60   11.51 
   2   0  -4  525.32   15.10 
  -2   0  -4  465.41   14.95 
  -2   0   4  486.53   15.06 
   2   0   4  474.73   14.99 
  -2   0  -4  422.67   14.87 
  -2   0   4  557.75   15.03 
  -3   0  -4    2.60    0.16 
  -3   0   4    2.60    0.22 
   3   0  -4    2.66    0.25 
  -3   0  -4    2.36    0.18 
   3   0   4    2.57    0.17 
  -3   0   4    2.72    0.23 
   3   0   4    2.55    0.21 
  -4   0   4  117.97    3.86 
  -4   0   4  118.94    3.77 
  -4   0  -4  115.39    3.67 
   4   0  -4  117.39    3.83 
   4   0   4  112.05    3.67 
  -4   0  -4  110.28    3.72 
   4   0   4  116.28    3.68 
   5   0   4   32.44    1.12 
  -5   0  -4   32.02    1.19 
   5   0  -4   32.35    1.28 
  -5   0   4   32.43    1.18 
  -5   0   4   31.50    1.33 
   5   0   4   31.75    1.19 
  -5   0  -4   30.31    1.24 
  -6   0   4  316.19    9.86 
   6   0  -4  306.90    9.70 
   6   0   4  311.78    9.47 
  -6   0  -4  325.61    9.67 
  -6   0   4  299.74    9.48 
   6   0   4  305.95    9.63 
  -6   0   4  299.23    9.45 
  -6   0  -4  301.48    9.71 
  -7   0  -4   30.10    1.31 
   7   0  -4   30.27    1.25 
  -7   0   4   29.99    1.38 
  -7   0  -4   31.31    1.26 
   7   0   4   30.85    1.25 
   8   0  -4   63.13    2.24 
   8   0   4   60.43    2.25 
  -8   0   4   59.91    2.43 
  -8   0  -4   61.03    2.27 
   9   0   4   39.83    1.61 
  -9   0  -4   40.45    1.64 
   9   0  -4   36.95    1.78 
  -9   0   4   37.71    1.76 
   9   0  -4   40.27    1.56 
  10   0   4    7.85    0.57 
  10   0  -4    8.66    0.53 
  10   0  -4    7.33    0.68 
 -10   0  -4    7.71    0.56 
 -10   0   4    7.03    0.60 
  11   0  -4  117.42    4.69 
  11   0   4  123.02    4.25 
 -11   0   4  115.73    4.49 
  11   0  -4  123.69    4.14 
 -11   0  -4  122.32    4.31 
 -12   0  -4   26.95    1.32 
  12   0  -4   25.91    1.18 
  12   0   4   27.22    1.31 
  12   0  -4   24.55    1.45 
 -12   0   4   25.55    1.46 
 -13   0  -4    2.71    0.45 
  13   0  -4    2.68    0.35 
  13   0  -4    2.80    0.57 
 -13   0   4    3.30    0.52 
  14   0  -4    0.29    0.36 
 -14   0  -4    0.16    0.36 
 -14   0   4    0.48    0.40 
  14   0  -4    1.00    0.64 
  15   0   4    6.77    0.83 
  15   0  -4    5.49    1.03 
  15   0  -4    7.04    0.67 
 -15   0  -4    5.49    0.62 
 -15   0   4    6.19    0.69 
  16   0  -4   30.23    1.84 
  16   0   4   34.06    1.68 
 -16   0  -4   31.02    1.63 
 -16   0   4   28.91    1.76 
  17   0   4    6.95    1.12 
 -17   0  -4    7.11    0.76 
   0  -1   4    0.04    0.06 
   0  -1   4   -0.05    0.07 
   0   1  -4    0.02    0.07 
   0   1   4    0.06    0.07 
  -1   1   4  106.53    3.60 
  -1   1   4  112.29    3.67 
   1  -1   4  113.37    3.65 
  -1  -1  -4  110.55    3.59 
   1   1  -4  108.79    3.66 
  -1  -1   4  111.03    3.66 
   1   1   4  110.85    3.62 
  -1   1  -4  112.79    3.64 
   1  -1  -4  113.11    3.67 
  -1  -1   4  117.31    3.55 
   2   1  -4  205.52    6.57 
  -2  -1  -4  189.95    6.35 
   2  -1   4  209.62    6.53 
  -2   1   4  217.08    6.54 
  -2   1   4  208.82    6.58 
  -2   1  -4  208.81    6.50 
   2  -1  -4  205.33    6.58 
  -2  -1   4  213.14    6.50 
   2   1   4  205.14    6.49 
  -2  -1   4  212.84    6.56 
  -2   1  -4  206.43    6.43 
   3  -1   4   77.17    2.54 
  -3  -1  -4   74.35    2.44 
  -3   1   4   79.79    2.61 
  -3  -1  -4   76.36    2.42 
  -3   1   4   75.43    2.60 
   3  -1   4   74.56    2.47 
   3   1  -4   77.44    2.62 
   3  -1  -4   79.20    2.64 
  -3  -1   4   75.32    2.56 
   3   1   4   72.20    2.40 
  -3   1  -4   77.11    2.43 
   3   1   4   76.17    2.49 
  -3   1  -4   74.69    2.51 
  -3  -1   4   77.25    2.59 
  -3   1  -4   74.21    2.47 
  -4  -1  -4   76.02    2.59 
   4   1  -4   81.18    2.71 
  -4  -1  -4   78.63    2.56 
   4  -1   4   80.79    2.62 
   4  -1   4   78.46    2.60 
  -4   1   4   81.49    2.76 
  -4   1   4   78.16    2.68 
   4   1   4   77.43    2.54 
   4  -1  -4   80.16    2.73 
  -4   1  -4   81.63    2.58 
  -4  -1   4   79.84    2.74 
  -4   1  -4   77.83    2.66 
  -4  -1   4   78.79    2.63 
   4   1   4   75.45    2.54 
  -5  -1  -4   71.27    2.36 
  -5   1   4   70.52    2.39 
   5  -1   4   72.04    2.34 
   5  -1   4   69.22    2.38 
  -5  -1  -4   66.19    2.38 
   5   1  -4   70.67    2.45 
   5  -1  -4   70.92    2.48 
   5   1   4   69.65    2.33 
  -5  -1   4   70.43    2.32 
  -5   1  -4   68.48    2.45 
  -5  -1   4   69.31    2.52 
  -5   1  -4   71.72    2.37 
   6   1  -4   17.68    0.83 
   6  -1   4   18.60    0.82 
  -6  -1  -4   18.48    0.80 
  -6   1   4   18.98    0.75 
  -6  -1  -4   16.96    0.81 
  -6   1   4   17.80    0.70 
   6  -1   4   18.59    0.74 
  -6   1   4   17.29    0.91 
  -6  -1   4   18.17    0.67 
  -6   1  -4   17.81    0.88 
   6  -1  -4   18.77    0.86 
   6   1   4   18.83    0.80 
  -6   1  -4   19.88    0.82 
  -6  -1   4   18.24    0.93 
  -7  -1  -4   38.57    1.48 
  -7   1   4   37.53    1.63 
   7  -1   4   38.64    1.34 
   7   1  -4   37.43    1.48 
   7  -1   4   37.76    1.49 
   7   1   4   38.17    1.46 
   7  -1  -4   38.83    1.51 
  -7   1  -4   38.25    1.49 
  -7   1  -4   36.76    1.56 
  -7  -1   4   36.95    1.61 
  -8  -1  -4   49.40    1.86 
  -8   1   4   47.55    2.02 
   8   1  -4   47.26    1.81 
   8  -1   4   48.50    1.86 
   8  -1   4   49.99    1.66 
   8  -1  -4   46.08    2.06 
  -8  -1   4   47.10    2.01 
   8  -1  -4   48.28    1.84 
   8   1   4   48.41    1.83 
  -8   1  -4   49.68    1.88 
  -8   1  -4   46.29    1.94 
  -9   1   4    2.09    0.34 
  -9  -1  -4    2.22    0.35 
   9  -1   4    1.60    0.18 
   9   1  -4    1.75    0.26 
   9  -1   4    1.82    0.31 
   9  -1  -4    1.75    0.28 
   9  -1  -4    1.57    0.35 
  -9   1  -4    1.62    0.34 
  -9   1  -4    2.05    0.32 
  -9  -1   4    1.90    0.37 
   9   1   4    2.24    0.30 
 -10   1   4   23.12    1.27 
  10  -1   4   23.86    1.15 
  10   1  -4   24.33    1.06 
  10   1  -4   22.01    1.29 
  10  -1   4   23.54    0.90 
 -10  -1  -4   25.16    1.17 
  10   1   4   24.70    1.15 
 -10  -1   4   21.85    1.24 
 -10   1  -4   24.93    1.18 
  10  -1  -4   22.80    1.06 
  10  -1  -4   21.32    1.29 
  11  -1   4    4.05    0.49 
  11   1  -4    4.46    0.41 
 -11   1   4    4.86    0.51 
 -11  -1  -4    3.54    0.45 
 -11   1  -4    4.03    0.46 
  11  -1  -4    4.51    0.41 
  11   1   4    4.13    0.48 
 -11  -1   4    4.78    0.50 
  11  -1  -4    3.86    0.57 
  12  -1   4    0.33    0.35 
  12  -1   4    0.27    0.15 
 -12  -1  -4    0.05    0.28 
 -12   1   4    0.56    0.37 
  12   1  -4    0.53    0.43 
  12   1  -4    0.26    0.27 
  12  -1  -4    0.19    0.27 
  12   1   4    0.15    0.31 
 -12  -1   4    0.07    0.29 
 -12   1  -4   -0.06    0.31 
  12  -1  -4   -0.03    0.39 
 -13  -1  -4    0.68    0.31 
  13   1  -4    0.58    0.60 
  13   1  -4    0.08    0.30 
  13  -1   4    1.12    0.38 
 -13   1   4   -0.08    0.38 
  13  -1   4    0.34    0.17 
  13   1   4    0.64    0.37 
  13  -1  -4   -0.35    0.55 
  13  -1  -4    0.53    0.32 
 -13  -1   4    0.58    0.36 
 -13   1  -4    0.19    0.33 
 -14   1   4    0.80    0.38 
  14   1  -4    0.05    0.36 
  14  -1   4    0.13    0.44 
  14   1  -4   -0.18    0.55 
  14  -1   4    0.36    0.21 
 -14  -1  -4   -0.02    0.35 
  14  -1  -4    0.74    0.38 
 -14  -1   4    0.43    0.37 
  14   1   4    0.82    0.46 
 -14   1  -4   -0.20    0.41 
  14  -1  -4   -0.03    0.57 
  15   1  -4    3.88    0.76 
  15  -1   4    4.97    0.77 
  15   1  -4    4.12    0.62 
 -15   1   4    4.44    0.65 
 -15  -1  -4    4.93    0.59 
  15  -1  -4    5.36    1.03 
 -15  -1   4    4.78    0.63 
  15   1   4    6.13    0.78 
  16   1  -4    2.55    0.91 
 -16   1   4    3.61    0.62 
  16  -1   4    4.59    0.90 
 -16  -1  -4    2.83    0.47 
  16   1   4    4.57    0.90 
  16  -1  -4    1.69    0.79 
 -16   1  -4    1.69    0.55 
 -16  -1   4    2.86    0.65 
 -17  -1  -4    6.60    0.70 
  17  -1   4    7.09    1.10 
 -17   1  -4    6.61    0.80 
  17   1   4    5.87    1.10 
   0   2   4   71.83    2.45 
   0  -2   4   70.14    2.45 
   0   2  -4   71.73    2.46 
   0  -2   4   72.23    2.24 
  -1   2   4   18.59    0.83 
   1  -2   4   19.59    0.83 
   1   2  -4   19.11    0.84 
  -1  -2   4   19.96    0.72 
  -1  -2   4   18.93    0.83 
  -1   2  -4   19.68    0.84 
   1   2   4   19.07    0.80 
  -1   2  -4   19.55    0.74 
   1  -2  -4   19.27    0.83 
   2  -2   4   47.90    1.69 
   2  -2   4   46.08    1.57 
  -2   2   4   45.59    1.71 
  -2   2   4   45.53    1.62 
   2   2  -4   46.56    1.71 
  -2   2  -4   46.89    1.60 
  -2  -2   4   45.92    1.68 
  -2   2  -4   46.85    1.67 
  -2  -2   4   48.08    1.62 
   2  -2  -4   47.09    1.71 
   3   2  -4   18.82    0.83 
   3  -2   4   19.25    0.80 
  -3   2   4   17.83    0.87 
  -3   2   4   18.02    0.83 
   3  -2   4   18.26    0.73 
   3  -2  -4   17.39    0.82 
  -3   2  -4   19.09    0.68 
  -3  -2   4   18.04    0.78 
  -3   2  -4   17.89    0.75 
  -3   2  -4   17.85    0.77 
  -3  -2   4   18.69    0.78 
   4  -2   4   22.53    0.90 
  -4  -2  -4   22.60    0.83 
  -4   2   4   21.85    0.94 
   4   2  -4   21.40    0.93 
  -4   2   4   21.08    0.95 
   4  -2   4   21.77    0.87 
  -4   2  -4   22.08    0.82 
  -4   2  -4   22.01    0.83 
   4   2   4   21.87    0.78 
  -4  -2   4   22.20    0.87 
  -4   2  -4   21.14    0.92 
   4  -2  -4   21.66    0.95 
  -4  -2   4   20.50    0.94 
   5  -2   4    8.54    0.45 
   5  -2   4    8.14    0.46 
   5   2  -4    8.46    0.48 
  -5   2   4    8.76    0.49 
  -5   2   4    8.29    0.52 
  -5   2   4    8.73    0.44 
  -5   2  -4    8.46    0.45 
   5  -2  -4    8.80    0.51 
  -5  -2   4    8.61    0.53 
   5   2   4    8.65    0.42 
  -5   2  -4    8.09    0.51 
  -5  -2   4    8.76    0.41 
  -6   2   4  390.82   12.53 
  -6  -2  -4  413.62   12.64 
  -6   2   4  417.25   12.89 
   6   2  -4  410.41   12.69 
   6  -2   4  408.19   12.59 
  -6   2   4  415.30   12.62 
   6  -2   4  405.74   12.69 
   6  -2  -4  411.96   12.75 
  -6  -2   4  423.76   12.87 
   6  -2  -4  395.25   12.93 
  -6  -2   4  387.77   12.43 
  -6   2  -4  422.53   12.69 
  -6   2  -4  403.78   12.80 
   6   2   4  405.38   12.59 
   7  -2   4   15.33    0.76 
  -7   2   4   15.33    0.60 
   7  -2   4   14.61    0.65 
  -7   2   4   14.76    0.62 
   7   2  -4   14.90    0.72 
   7  -2  -4   14.31    0.87 
  -7  -2   4   14.99    0.82 
  -7   2  -4   14.20    0.81 
   7   2   4   15.23    0.72 
   7  -2  -4   14.91    0.75 
  -7   2  -4   14.75    0.74 
   8  -2   4    2.29    0.30 
   8   2  -4    2.15    0.27 
  -8   2   4    2.44    0.41 
  -8  -2  -4    2.80    0.29 
   8  -2   4    2.58    0.22 
   8  -2  -4    2.61    0.29 
  -8   2  -4    3.12    0.32 
   8   2   4    2.75    0.30 
   8  -2  -4    1.85    0.36 
  -8   2  -4    1.86    0.34 
  -8  -2   4    3.17    0.34 
  -9  -2  -4    0.36    0.22 
   9  -2   4    0.85    0.21 
   9   2  -4    0.13    0.16 
  -9   2   4    0.97    0.30 
   9  -2   4    0.44    0.12 
  -9   2  -4    0.29    0.25 
   9   2   4    0.70    0.20 
  -9   2  -4    0.20    0.23 
  -9  -2   4    0.35    0.22 
   9  -2  -4    0.39    0.20 
   9  -2  -4    0.96    0.26 
  10  -2   4    5.21    0.34 
 -10   2   4    4.67    0.51 
 -10  -2  -4    4.85    0.43 
  10   2  -4    4.98    0.39 
  10  -2   4    5.27    0.47 
  10  -2  -4    6.03    0.45 
 -10  -2   4    5.30    0.51 
 -10   2  -4    5.31    0.52 
  10   2   4    5.04    0.47 
 -10   2  -4    5.74    0.48 
  11   2  -4   12.78    0.72 
 -11   2   4   13.31    0.92 
  11  -2   4   14.17    0.85 
  11   2  -4   12.29    1.37 
  11  -2   4   13.95    0.63 
 -11  -2  -4   13.12    0.81 
  11   2   4   13.57    0.82 
  11  -2  -4   13.73    0.75 
 -11  -2   4   13.21    0.89 
 -11   2  -4   13.42    0.82 
  11  -2  -4   13.09    0.95 
  12   2  -4   88.37    3.68 
  12  -2   4   92.91    3.08 
  12  -2   4   93.53    3.54 
 -12   2   4   90.53    3.72 
  12   2  -4   93.58    3.28 
 -12  -2  -4   91.17    3.45 
  12  -2  -4   94.58    3.32 
 -12   2  -4   94.49    3.52 
  12   2   4   93.39    3.40 
 -12  -2   4   92.34    3.70 
  12  -2  -4   93.80    3.74 
  13  -2   4    1.09    0.39 
 -13   2   4   -0.01    0.41 
 -13  -2  -4    0.25    0.31 
  13   2  -4    0.72    0.31 
  13  -2   4    0.57    0.19 
 -13   2  -4   -0.04    0.36 
  13   2   4    0.71    0.37 
  13  -2  -4    0.90    0.55 
 -13  -2   4    0.15    0.31 
  14   2  -4   18.23    0.96 
  14   2  -4   18.19    1.31 
 -14   2   4   17.34    1.18 
  14  -2   4   19.95    1.33 
  14  -2   4   18.91    0.82 
 -14  -2  -4   17.91    1.05 
 -14  -2   4   16.71    1.17 
  14   2   4   17.87    1.12 
 -14   2  -4   18.06    1.10 
  14  -2  -4   16.85    1.27 
  15  -2   4   10.00    0.55 
  15  -2   4    8.99    0.89 
  15   2  -4   10.42    0.74 
  15   2  -4    9.21    1.07 
 -15   2   4    8.31    0.85 
 -15  -2  -4    8.46    0.72 
 -15   2  -4    9.52    0.78 
 -15  -2   4    7.46    0.79 
  15  -2  -4    9.01    1.06 
  15   2   4    9.46    0.89 
 -16   2   4   39.74    2.12 
  16   2  -4   36.20    1.64 
  16  -2   4   35.66    2.20 
  16  -2   4   40.12    1.50 
  16   2  -4   39.05    2.13 
 -16  -2  -4   39.18    1.88 
 -16  -2   4   38.51    2.06 
  16  -2  -4   33.28    2.08 
  16   2   4   41.25    1.91 
 -16   2  -4   39.17    1.94 
  17  -2   4    2.65    0.83 
  17   2  -4    5.25    1.16 
  17   2  -4    3.77    0.63 
 -17  -2  -4    3.37    0.59 
  17   2   4    3.62    0.80 
 -17  -2   4    3.36    0.84 
 -17   2  -4    2.07    0.53 
   0  -3   4    0.01    0.07 
   0   3   4   -0.07    0.08 
   1   3  -4    0.58    0.16 
  -1   3   4    0.52    0.14 
   1  -3   4    0.69    0.16 
  -1  -3   4    0.50    0.09 
  -1   3  -4    0.61    0.12 
  -1   3  -4    0.37    0.13 
  -1  -3   4    0.61    0.16 
   2  -3   4   17.84    0.80 
   2   3  -4   18.52    0.82 
  -2   3   4   18.12    0.83 
   2  -3   4   18.64    0.73 
   2  -3  -4   16.41    0.79 
  -2  -3   4   18.69    0.79 
  -2   3  -4   18.12    0.80 
  -2   3  -4   17.57    0.74 
  -2  -3   4   17.59    0.71 
  -3   3   4    8.36    0.50 
   3   3  -4    8.51    0.49 
   3  -3   4    8.68    0.48 
   3  -3   4    8.22    0.42 
  -3  -3   4    8.61    0.45 
  -3   3  -4    8.04    0.37 
  -3   3  -4    7.90    0.46 
   3  -3  -4    7.80    0.50 
  -3  -3   4    8.07    0.45 
  -3   3  -4    8.58    0.46 
   3  -3  -4    7.98    0.48 
   4  -3   4   66.24    2.28 
   4   3  -4   66.05    2.31 
   4  -3   4   67.64    2.26 
  -4   3   4   64.62    2.33 
  -4   3   4   66.34    2.34 
  -4  -3   4   64.91    2.21 
  -4   3  -4   67.38    2.20 
  -4   3  -4   64.65    2.22 
  -4   3  -4   66.55    2.33 
   4  -3  -4   61.19    2.40 
  -4  -3   4   66.17    2.32 
   4  -3  -4   65.42    2.34 
  -5   3   4   23.44    1.01 
   5  -3   4   22.94    0.98 
  -5   3   4   23.33    0.94 
  -5  -3  -4   23.65    0.92 
   5  -3   4   24.17    0.98 
   5   3  -4   24.82    1.01 
   5  -3  -4   22.16    1.11 
  -5  -3   4   23.89    0.88 
  -5   3  -4   22.72    0.86 
  -5   3  -4   24.87    0.95 
   5  -3  -4   24.58    1.04 
  -5   3  -4   22.45    1.05 
  -5  -3   4   20.00    1.10 
  -6   3   4   12.66    0.73 
  -6  -3  -4   14.01    0.64 
  -6   3   4   13.16    0.65 
  -6   3   4   13.53    0.61 
   6  -3   4   13.25    0.64 
   6  -3   4   13.13    0.68 
   6   3  -4   13.41    0.67 
   6  -3  -4   13.21    0.80 
  -6  -3   4   12.96    0.72 
   6  -3  -4   13.49    0.71 
   6   3   4   13.14    0.60 
  -6  -3   4   12.93    0.51 
  -6   3  -4   13.42    0.76 
  -6   3  -4   14.03    0.66 
  -7   3   4  114.51    3.76 
  -7   3   4  115.08    4.07 
  -7  -3  -4  116.80    3.84 
  -7   3   4  111.06    3.68 
   7  -3   4  114.14    3.89 
   7   3  -4  117.15    3.84 
   7  -3   4  116.28    3.77 
   7  -3  -4  116.34    3.91 
  -7   3  -4  110.74    4.02 
  -7  -3   4  116.54    4.03 
  -7   3  -4  117.64    3.89 
   7  -3  -4  110.09    4.11 
   7   3   4  115.00    3.78 
  -8  -3  -4   18.83    0.87 
   8   3  -4   18.16    0.84 
   8  -3   4   17.95    0.91 
   8  -3   4   17.81    0.79 
  -8   3   4   16.92    0.98 
   8   3   4   17.87    0.84 
  -8   3  -4   19.08    0.90 
   8  -3  -4   17.80    0.87 
   8  -3  -4   16.60    1.00 
  -8   3  -4   16.58    0.97 
  -8  -3   4   16.61    0.95 
   9  -3   4    2.13    0.33 
  -9   3   4    1.75    0.33 
  -9  -3  -4    1.95    0.29 
   9   3  -4    1.36    0.25 
   9  -3   4    1.20    0.21 
   9  -3  -4    2.35    0.31 
  -9  -3   4    1.76    0.32 
   9   3   4    1.68    0.30 
   9  -3  -4    2.18    0.42 
  -9   3  -4    1.66    0.34 
  -9   3  -4    2.45    0.37 
 -10   3   4    0.17    0.30 
 -10  -3  -4    0.55    0.23 
  10  -3   4    0.41    0.15 
  10   3  -4    0.41    0.20 
  10  -3   4    0.94    0.26 
 -10   3  -4   -0.02    0.29 
 -10   3  -4    0.59    0.27 
  10   3   4    0.63    0.24 
  10  -3  -4    0.00    0.34 
 -10  -3   4    0.57    0.26 
  11  -3   4    5.58    0.40 
  11   3  -4    5.20    0.45 
 -11  -3  -4    5.57    0.49 
  11  -3   4    6.56    0.55 
 -11   3   4    5.20    0.57 
 -11  -3   4    4.91    0.53 
  11   3   4    6.54    0.54 
  11  -3  -4    5.65    0.65 
 -11   3  -4    5.96    0.55 
  12  -3   4   18.85    0.86 
  12  -3   4   21.04    1.12 
 -12  -3  -4   17.59    1.01 
  12   3  -4   18.55    0.93 
  12   3  -4   19.25    1.22 
 -12   3   4   18.28    1.20 
 -12   3  -4   19.13    1.10 
 -12  -3   4   19.75    1.19 
  12   3   4   19.63    1.04 
  12  -3  -4   20.87    1.29 
  13   3  -4    1.97    0.68 
 -13  -3  -4    1.76    0.39 
  13  -3   4    1.25    0.40 
  13  -3   4    1.52    0.31 
 -13   3   4    1.82    0.47 
  13   3  -4    1.62    0.33 
  13   3   4    2.13    0.40 
 -13  -3   4    2.55    0.46 
 -13   3  -4    1.48    0.40 
  13  -3  -4    1.43    0.54 
  14   3  -4    9.57    0.68 
  14  -3   4   10.13    0.58 
 -14   3   4    8.67    0.79 
  14  -3   4    9.70    0.84 
  14   3  -4    9.11    0.97 
 -14  -3  -4    9.71    0.72 
 -14  -3   4    8.03    0.78 
 -14   3  -4   11.08    0.79 
  14   3   4   10.11    0.94 
  15  -3   4    2.25    0.41 
  15  -3   4    2.16    0.57 
 -15  -3  -4    2.57    0.49 
 -15   3   4    1.93    0.60 
  15   3  -4    1.78    0.75 
  15   3   4    2.22    0.53 
 -15   3  -4    1.86    0.46 
 -15  -3   4    2.76    0.53 
  15  -3  -4    1.88    0.69 
 -16  -3  -4    0.99    0.44 
  16  -3   4    1.61    0.66 
 -16   3   4    0.59    0.50 
  16   3  -4    0.41    0.88 
  16   3  -4    0.34    0.50 
 -16  -3   4    0.44    0.44 
 -16   3  -4    0.69    0.51 
  16   3   4    1.13    0.64 
  16  -3  -4    0.80    0.95 
  17   3  -4   15.79    1.59 
 -17  -3  -4   15.07    1.03 
 -17   3   4   14.75    1.74 
  17  -3   4   17.62    0.91 
  17  -3   4   15.87    1.44 
  17   3  -4   13.62    1.02 
  17   3   4   15.91    1.61 
 -17  -3   4   13.29    1.23 
 -17   3  -4   16.17    1.12 
   0   4  -4   47.96    1.79 
   0  -4  -4   47.82    1.64 
   0  -4   4   50.22    1.79 
   1  -4   4   93.03    3.24 
   1   4  -4   97.93    3.27 
   1  -4  -4   92.37    3.17 
  -1  -4   4  100.92    3.24 
  -1  -4   4   99.97    3.08 
  -1   4  -4   95.12    3.14 
   2   4  -4    3.60    0.29 
  -2   4   4    3.27    0.29 
   2  -4   4    3.58    0.25 
   2  -4   4    3.70    0.29 
  -2  -4   4    3.49    0.28 
   2  -4  -4    3.35    0.28 
  -2  -4   4    3.51    0.23 
  -2   4  -4    3.59    0.29 
  -2   4  -4    3.72    0.28 
   3  -4   4    9.26    0.47 
   3  -4   4    9.43    0.52 
   3   4  -4    9.73    0.53 
  -3   4   4    9.19    0.55 
  -3   4  -4    8.83    0.50 
  -3  -4   4    9.63    0.49 
  -3  -4   4    8.74    0.46 
  -3   4  -4    8.90    0.51 
   3  -4  -4    8.06    0.52 
  -4   4   4   83.84    2.92 
   4  -4   4   84.79    2.87 
   4   4  -4   85.13    2.88 
   4  -4   4   83.42    2.82 
  -4   4   4   84.53    2.83 
  -4   4   4   81.50    2.89 
  -4   4  -4   83.74    2.75 
  -4   4  -4   85.67    2.84 
   4  -4  -4   81.58    2.98 
  -4  -4   4   83.38    2.86 
  -4   4  -4   82.95    2.92 
  -4  -4   4   83.66    2.78 
   5  -4   4   12.98    0.65 
   5   4  -4   13.53    0.67 
   5  -4   4   13.82    0.67 
  -5   4   4   12.32    0.67 
  -5   4   4   12.77    0.62 
   5  -4  -4   12.95    0.77 
  -5   4  -4   12.69    0.60 
  -5  -4   4   13.07    0.71 
  -5   4  -4   12.83    0.72 
  -5   4  -4   13.51    0.62 
  -5  -4   4   12.99    0.56 
   6  -4   4   93.46    3.19 
   6   4  -4   91.83    3.15 
  -6   4   4   92.20    3.18 
  -6   4   4   92.18    3.31 
  -6   4   4   93.50    3.09 
   6  -4   4   93.35    3.13 
  -6   4  -4   92.13    3.32 
  -6   4  -4   96.60    3.16 
   6  -4  -4   89.00    3.37 
  -6  -4   4   90.20    3.25 
  -6  -4   4   90.83    2.93 
  -6   4  -4   93.60    2.98 
  -7   4   4    0.40    0.22 
  -7   4   4    0.22    0.15 
  -7   4   4    0.43    0.12 
   7   4  -4    0.38    0.14 
   7  -4   4    0.43    0.18 
   7  -4   4    0.21    0.12 
  -7  -4  -4    0.35    0.16 
  -7   4  -4    0.40    0.20 
   7  -4  -4    0.29    0.19 
  -7  -4   4    0.43    0.22 
  -7   4  -4    0.35    0.22 
  -8  -4  -4    4.14    0.35 
   8  -4   4    4.84    0.34 
  -8   4   4    4.83    0.31 
   8  -4   4    4.26    0.38 
  -8   4   4    3.91    0.45 
   8   4  -4    4.44    0.36 
  -8   4   4    4.41    0.30 
  -8   4  -4    4.13    0.44 
   8   4   4    4.33    0.36 
   8  -4  -4    4.30    0.47 
  -8  -4   4    4.35    0.40 
  -8   4  -4    4.43    0.41 
   9  -4   4    2.65    0.36 
   9  -4   4    2.82    0.27 
  -9   4   4    2.57    0.43 
   9   4  -4    2.56    0.31 
  -9  -4  -4    2.55    0.32 
  -9  -4   4    2.59    0.34 
   9  -4  -4    2.73    0.42 
  -9   4  -4    3.06    0.41 
   9   4   4    2.66    0.32 
  -9   4  -4    3.41    0.46 
  10  -4   4    2.35    0.39 
  10   4  -4    1.68    0.30 
  10  -4   4    1.82    0.26 
 -10  -4  -4    2.00    0.31 
 -10   4   4    2.00    0.42 
 -10  -4   4    2.83    0.37 
 -10   4  -4    1.68    0.29 
 -10   4  -4    2.38    0.47 
  10   4   4    1.65    0.34 
  11   4  -4    2.25    0.36 
 -11  -4  -4    3.61    0.39 
  11  -4   4    2.98    0.32 
 -11   4   4    2.62    0.47 
  11  -4   4    3.57    0.48 
  11   4   4    2.71    0.42 
 -11   4  -4    3.02    0.45 
 -11   4  -4    2.32    0.50 
 -11  -4   4    3.41    0.42 
  11  -4  -4    3.10    0.59 
  12  -4   4   56.14    2.03 
  12  -4   4   54.55    2.28 
 -12  -4  -4   55.80    2.27 
 -12   4   4   54.12    2.51 
  12   4  -4   54.46    2.18 
 -12  -4   4   55.27    2.46 
  12  -4  -4   53.26    3.11 
 -12   4  -4   57.26    2.35 
  12   4   4   54.67    2.19 
  13  -4   4    2.51    0.45 
  13  -4   4    2.06    0.33 
  13   4  -4    2.00    0.61 
 -13  -4  -4    1.12    0.32 
 -13   4   4    1.30    0.38 
  13   4  -4    1.52    0.33 
  13  -4  -4    1.87    0.55 
 -13  -4   4    1.14    0.31 
 -13   4  -4    2.29    0.44 
  14  -4   4    9.00    0.60 
  14  -4   4    9.93    0.87 
  14   4  -4    7.68    0.66 
 -14  -4  -4    8.93    0.71 
  14   4  -4    9.67    1.03 
 -14   4   4   10.12    0.86 
 -14   4  -4    8.30    0.78 
 -14  -4   4    9.49    0.80 
  14   4   4    9.95    0.79 
  14  -4  -4    8.35    0.99 
 -15   4   4    9.81    0.89 
  15  -4   4   10.10    0.94 
  15  -4   4   10.50    0.63 
  15   4  -4    7.86    1.09 
 -15  -4  -4    9.29    0.75 
  15   4  -4   10.59    0.76 
  15  -4  -4    8.01    1.11 
 -15   4  -4   11.38    0.84 
  15   4   4    9.85    0.90 
 -15  -4   4    9.36    0.81 
 -16  -4  -4    6.60    0.63 
  16   4  -4    5.80    1.21 
  16  -4   4    7.08    0.69 
  16  -4   4    7.14    1.02 
 -16   4   4    6.79    0.80 
  16   4  -4    6.49    0.79 
 -16  -4   4    6.54    0.72 
  16  -4  -4    5.30    0.95 
 -16   4  -4    5.60    0.73 
  16   4   4    7.33    1.14 
  17  -4   4    2.43    0.86 
 -17   4   4   -0.78    0.63 
  17   4  -4    1.44    1.08 
 -17  -4  -4    0.76    0.45 
  17   4  -4    1.23    0.63 
 -17   4  -4   -0.54    0.55 
 -17  -4   4   -0.35    0.48 
  17   4   4    0.24    0.78 
   0   5   4   -0.19    0.08 
   0  -5  -4   -0.09    0.07 
   0   5  -4   -0.11    0.09 
   0  -5   4   -0.09    0.08 
   1  -5   4  132.57    4.36 
  -1   5   4  132.07    4.30 
   1   5  -4  134.10    4.39 
  -1   5  -4  131.97    4.39 
   1  -5  -4  129.73    4.27 
  -1   5  -4  134.90    4.27 
   2  -5   4   39.53    1.41 
   2  -5   4   38.51    1.49 
   2   5  -4   38.56    1.50 
  -2   5  -4   38.17    1.44 
   2  -5  -4   37.75    1.47 
  -2  -5   4   38.18    1.46 
  -2   5  -4   37.95    1.50 
  -3   5   4   15.25    0.75 
   3   5  -4   16.87    0.79 
  -3   5   4   16.55    0.82 
   3  -5   4   16.25    0.78 
   3  -5   4   16.01    0.72 
  -3  -5   4   15.99    0.70 
   3  -5  -4   15.88    0.80 
  -3   5  -4   16.28    0.78 
  -3  -5   4   16.94    0.74 
  -3   5  -4   15.68    0.78 
  -4   5   4  142.82    5.95 
   4  -5   4  172.73    5.51 
  -4   5   4  167.55    5.47 
   4   5  -4  174.34    5.52 
  -4   5   4  176.23    5.59 
   4  -5   4  171.62    5.46 
  -4   5  -4  174.61    5.37 
  -4  -5   4  168.68    5.46 
  -4   5  -4  175.18    5.51 
   4  -5  -4  167.99    5.62 
  -4  -5   4  168.40    5.40 
  -4   5  -4  173.87    5.58 
  -5   5   4  117.78    3.95 
  -5   5   4  115.28    4.06 
   5  -5   4  119.64    3.98 
   5  -5   4  120.39    3.99 
   5   5  -4  120.74    4.00 
  -5   5   4  119.49    4.06 
  -5  -5   4  118.19    3.84 
   5  -5  -4  115.11    4.14 
  -5   5  -4  122.22    3.96 
  -5  -5   4  115.98    4.00 
  -5   5  -4  118.78    4.12 
  -5   5  -4  129.83    4.08 
   6  -5   4   40.61    1.56 
  -6   5   4   40.27    1.60 
   6  -5   4   39.95    1.59 
  -6   5   4   38.98    1.66 
  -6   5   4   40.47    1.53 
   6   5  -4   41.59    1.58 
  -6   5  -4   40.67    1.72 
   6  -5  -4   38.84    1.73 
  -6  -5   4   38.84    1.37 
  -6  -5   4   39.78    1.62 
  -6   5  -4   41.54    1.55 
  -6   5  -4   40.57    1.48 
  -7   5   4   40.08    1.47 
   7  -5   4   40.20    1.59 
   7   5  -4   40.27    1.54 
  -7   5   4   39.74    1.54 
  -7   5   4   38.06    1.68 
  -7  -5  -4   39.82    1.50 
   7  -5   4   39.51    1.52 
  -7   5  -4   35.29    1.66 
  -7   5  -4   36.87    1.70 
   7  -5  -4   39.16    1.74 
  -7  -5   4   38.32    1.63 
   7   5   4   37.33    1.42 
   8  -5   4   60.31    2.19 
  -8  -5  -4   59.86    2.21 
  -8   5   4   60.74    2.16 
  -8   5   4   59.81    2.45 
  -8   5   4   59.98    2.09 
   8   5  -4   60.44    2.21 
   8  -5   4   61.05    2.30 
   8   5   4   60.09    2.14 
  -8   5  -4   61.11    2.29 
  -8   5  -4   60.38    2.48 
   8  -5  -4   57.63    2.45 
  -8  -5   4   58.48    2.35 
  -9   5   4   85.28    3.39 
  -9  -5  -4   88.37    3.08 
   9   5  -4   86.19    3.04 
  -9   5   4   85.12    2.93 
   9  -5   4   85.49    3.00 
   9  -5   4   87.15    3.17 
  -9   5   4   88.00    2.88 
   9  -5  -4   85.12    3.37 
  -9   5  -4   84.74    3.36 
   9   5   4   87.75    3.01 
  -9   5  -4   87.24    3.16 
  -9  -5   4   84.76    3.25 
 -10   5   4    3.36    0.59 
 -10  -5  -4    2.40    0.34 
  10  -5   4    3.27    0.43 
  10   5  -4    2.66    0.34 
  10  -5   4    2.62    0.31 
 -10  -5   4    3.03    0.39 
 -10   5  -4    2.57    0.44 
  10   5   4    2.78    0.37 
 -10   5  -4    2.82    0.53 
  10  -5  -4    2.36    0.47 
  11  -5   4   12.41    0.67 
 -11  -5  -4   12.00    0.74 
 -11   5   4   12.45    0.92 
  11   5  -4   12.91    0.72 
  11  -5   4   12.81    0.83 
 -11   5  -4   10.56    0.87 
 -11   5  -4   12.93    0.82 
  11  -5  -4   11.08    0.91 
 -11  -5   4   11.46    0.80 
  11   5   4   12.89    0.75 
 -12   5   4   10.84    0.85 
  12  -5   4   11.37    0.65 
  12  -5   4   11.74    0.82 
  12   5  -4    9.84    0.66 
 -12  -5  -4   12.10    0.75 
  12  -5  -4   11.75    0.95 
 -12   5  -4   11.38    0.81 
 -12   5  -4   10.61    0.90 
 -12  -5   4   11.26    0.81 
  12   5   4   11.54    0.74 
 -13   5   4    3.62    0.55 
 -13  -5  -4    2.90    0.41 
  13  -5   4    3.32    0.62 
  13  -5   4    2.68    0.39 
  13   5  -4    2.75    0.45 
  13   5  -4    2.33    0.87 
  13  -5  -4    2.62    0.62 
 -13  -5   4    2.99    0.49 
 -13   5  -4    3.11    0.54 
  13   5   4    3.47    0.56 
  14   5  -4    1.02    0.37 
  14  -5   4    1.05    0.31 
  14  -5   4    1.23    0.52 
 -14   5   4    1.33    0.44 
  14   5  -4    0.90    0.62 
 -14  -5  -4    0.77    0.32 
  14   5   4    0.92    0.45 
 -14  -5   4    1.34    0.42 
 -14   5  -4    1.70    0.45 
  14  -5  -4    1.56    0.69 
  15   5  -4    2.83    0.52 
 -15   5   4    2.35    0.55 
  15  -5   4    2.96    0.55 
  15   5  -4    3.47    0.76 
 -15  -5  -4    2.80    0.47 
  15  -5   4    4.32    0.83 
 -15  -5   4    3.22    0.56 
  15   5   4    4.13    0.76 
 -15   5  -4    2.22    0.51 
  15  -5  -4    3.73    0.88 
 -16   5   4    1.74    0.49 
  16  -5   4    3.12    0.67 
  16   5  -4    2.29    0.55 
  16   5  -4    1.74    0.92 
  16   5   4    3.09    0.66 
 -16  -5   4    1.95    0.44 
 -16   5  -4    2.44    0.59 
  17   5  -4    1.24    0.70 
  17   5  -4    1.41    1.11 
 -17   5  -4    1.61    0.64 
  17   5   4    0.25    0.78 
 -17  -5   4    1.85    0.55 
   0  -6  -4   68.31    2.26 
   0  -6   4   68.53    2.43 
   0   6   4   65.96    2.31 
   0   6  -4   70.22    2.33 
   1  -6   4    9.01    0.54 
  -1   6   4    8.66    0.49 
   1  -6  -4    8.96    0.46 
   1   6   4    8.42    0.40 
  -1  -6   4    8.64    0.51 
  -1   6  -4    8.53    0.53 
  -1   6  -4    8.93    0.49 
  -2   6   4   20.13    0.91 
  -2   6   4   19.54    0.93 
   2  -6   4   20.27    0.86 
   2   6  -4   20.13    0.94 
   2  -6   4   20.92    0.95 
  -2  -6   4   20.03    0.90 
  -2   6  -4   21.02    0.96 
  -2   6  -4   20.60    0.90 
   2  -6  -4   18.87    0.88 
   3   6  -4   95.53    3.34 
   3  -6   4   98.27    3.25 
  -3   6   4   95.53    3.40 
  -3   6   4   97.71    3.31 
   3  -6   4   98.47    3.34 
  -3   6  -4   97.66    3.34 
  -3  -6   4   96.48    3.20 
  -3   6  -4  100.22    3.37 
  -3  -6   4   96.71    3.26 
   3  -6  -4   95.88    3.35 
  -4   6   4    1.25    0.19 
   4  -6   4    1.70    0.20 
   4  -6   4    1.41    0.20 
  -4   6   4    1.28    0.24 
   4   6  -4    1.30    0.21 
  -4  -6   4    1.23    0.18 
  -4   6  -4    1.41    0.21 
  -4  -6   4    1.60    0.17 
   4  -6  -4    1.17    0.23 
  -4   6  -4    0.96    0.20 
   5   6  -4   36.51    1.43 
  -5   6   4   36.27    1.41 
  -5   6   4   34.94    1.47 
   5  -6   4   36.11    1.41 
   5  -6   4   36.12    1.44 
  -5   6   4   33.31    1.44 
  -5  -6   4   34.33    1.40 
  -5   6  -4   35.22    1.41 
  -5   6  -4   34.18    1.52 
   5  -6  -4   33.13    1.51 
  -5  -6   4   35.24    1.30 
  -5   6  -4   34.89    1.33 
   6  -6   4   62.68    2.28 
  -6   6   4   60.58    2.37 
  -6   6   4   62.96    2.24 
   6   6  -4   62.10    2.27 
  -6   6   4   62.52    2.33 
   6  -6   4   61.84    2.29 
   6  -6  -4   58.45    2.42 
  -6  -6   4   61.25    2.30 
  -6  -6   4   60.70    2.06 
  -6   6  -4   64.02    2.24 
  -6   6  -4   60.55    2.44 
  -6   6  -4   64.15    2.22 
   7  -6   4   46.53    1.83 
  -7   6   4   45.66    1.81 
   7   6  -4   46.74    1.79 
   7  -6   4   44.96    1.94 
  -7   6   4   46.00    1.73 
  -7   6   4   44.89    1.93 
  -7   6  -4   47.59    1.78 
  -7  -6   4   45.29    1.86 
  -7   6  -4   48.00    1.81 
  -7   6  -4   45.87    1.99 
   7  -6  -4   44.98    1.98 
   8  -6   4    0.56    0.23 
  -8   6   4    0.58    0.20 
  -8   6   4    1.32    0.35 
   8   6  -4    0.82    0.20 
   8  -6   4    0.75    0.19 
  -8  -6  -4    0.51    0.17 
  -8   6   4    0.91    0.18 
  -8  -6   4    1.01    0.28 
  -8   6  -4    0.85    0.29 
   8   6   4    0.96    0.18 
   8  -6  -4    0.75    0.28 
  -8   6  -4    0.62    0.29 
   9  -6   4    6.30    0.44 
  -9   6   4    5.45    0.55 
  -9  -6  -4    5.56    0.42 
   9  -6   4    5.00    0.47 
  -9   6   4    5.39    0.39 
   9   6  -4    5.72    0.44 
  -9   6   4    5.50    0.36 
   9  -6  -4    5.05    0.55 
  -9   6  -4    5.45    0.49 
  -9  -6   4    6.15    0.51 
  -9   6  -4    5.28    0.57 
   9   6   4    6.57    0.43 
 -10  -6  -4   20.06    1.01 
  10  -6   4   17.65    1.42 
  10  -6   4   21.75    0.99 
  10   6  -4   21.42    1.00 
 -10   6   4   19.63    1.16 
 -10   6  -4   21.66    1.10 
 -10   6  -4   21.35    1.25 
  10  -6  -4   19.84    1.19 
 -10  -6   4   19.75    1.11 
  10   6   4   20.43    0.98 
  11   6  -4    2.73    0.40 
  11  -6   4    3.27    0.35 
 -11  -6  -4    2.55    0.35 
  11  -6   4    2.45    0.48 
 -11   6   4    3.01    0.56 
 -11  -6   4    2.81    0.42 
 -11   6  -4    3.20    0.60 
  11   6   4    2.46    0.42 
 -11   6  -4    2.68    0.41 
  12  -6   4    4.44    0.43 
 -12   6   4    4.59    0.57 
 -12  -6  -4    3.83    0.45 
  12  -6   4    4.70    0.60 
  12   6  -4    4.34    0.47 
 -12   6  -4    3.59    0.55 
 -12   6  -4    3.73    0.75 
  12  -6  -4    3.61    0.69 
 -12  -6   4    3.88    0.50 
 -13  -6  -4    0.54    0.28 
  13   6  -4    0.29    0.35 
  13  -6   4    0.63    0.28 
 -13   6   4    1.07    0.45 
  13  -6   4    1.03    0.47 
  13   6   4    0.87    0.40 
 -13   6  -4    0.51    0.41 
  13  -6  -4    1.15    0.60 
 -13  -6   4    0.59    0.31 
 -14   6   4    3.73    0.63 
  14  -6   4    4.48    0.75 
  14   6  -4    4.76    0.94 
  14   6  -4    3.15    0.47 
  14  -6   4    3.43    0.49 
 -14  -6  -4    3.65    0.48 
  14  -6  -4    5.39    0.96 
 -14  -6   4    3.12    0.48 
  14   6   4    5.05    0.68 
 -14   6  -4    4.00    0.61 
  15  -6   4   -0.59    0.41 
  15   6  -4    0.67    0.74 
  15   6  -4    0.08    0.47 
 -15  -6  -4    0.29    0.36 
  15  -6   4    1.54    0.60 
 -15   6   4    0.38    0.49 
  15  -6  -4   -0.27    0.78 
 -15   6  -4   -0.12    0.49 
  15   6   4    1.00    0.96 
 -15  -6   4    0.37    0.37 
  16   6  -4    7.96    1.36 
  16  -6   4    8.75    1.11 
  16   6  -4    6.79    0.83 
 -16  -6  -4    7.14    0.65 
 -16   6   4    7.03    0.81 
  16   6   4    9.53    0.98 
 -16  -6   4    6.57    0.69 
   0  -7   4    0.00    0.10 
   0  -7  -4    0.03    0.08 
   0   7   4   -0.09    0.11 
   0   7  -4    0.05    0.11 
   0   7  -4    0.00    0.10 
  -1   7   4   55.55    2.12 
  -1  -7  -4   62.69    1.90 
  -1   7   4   56.92    2.09 
   1  -7   4   57.43    2.15 
   1   7  -4   57.36    2.17 
  -1   7  -4   57.52    2.18 
  -1   7  -4   58.24    2.08 
  -1  -7   4   58.42    2.14 
   1   7   4   58.02    1.97 
   1  -7  -4   57.33    2.02 
   2  -7   4    7.62    0.42 
  -2   7   4    6.70    0.46 
  -2   7   4    6.99    0.48 
   2   7  -4    6.96    0.47 
   2  -7   4    6.79    0.47 
  -2   7  -4    6.42    0.47 
  -2  -7   4    7.26    0.45 
   2  -7  -4    6.89    0.43 
  -2   7  -4    6.90    0.46 
   3  -7   4   14.12    0.76 
  -3   7   4   14.50    0.80 
   3   7  -4   14.45    0.76 
   3  -7   4   14.72    0.70 
  -3   7   4   13.94    0.73 
  -3   7  -4   14.89    0.76 
   3  -7  -4   14.39    0.74 
  -3  -7   4   14.61    0.71 
  -3   7  -4   13.86    0.76 
  -4   7   4   42.26    1.71 
  -4   7   4   41.74    1.64 
  -4   7   4   38.62    1.74 
   4  -7   4   42.93    1.61 
   4  -7   4   41.79    1.67 
   4   7  -4   40.73    1.65 
  -4  -7   4   41.46    1.56 
  -4   7  -4   41.67    1.72 
  -4   7  -4   42.96    1.68 
  -4  -7   4   42.88    1.56 
   4  -7  -4   39.30    1.68 
   5   7  -4    1.26    0.21 
  -5   7   4    1.25    0.22 
  -5   7   4    1.25    0.23 
   5  -7   4    0.96    0.21 
  -5   7   4    0.98    0.22 
  -5   7   4    1.03    0.20 
   5  -7  -4    0.81    0.21 
  -5  -7   4    1.19    0.22 
  -5   7  -4    1.09    0.21 
  -5   7  -4    1.07    0.19 
  -5   7  -4    1.29    0.25 
   6  -7   4    0.49    0.15 
  -6   7   4    0.96    0.24 
   6   7  -4    0.63    0.16 
  -6   7   4    0.49    0.18 
  -6   7   4    0.13    0.20 
   6  -7   4    0.70    0.18 
  -6   7  -4    0.61    0.16 
  -6  -7   4    0.55    0.10 
   6  -7  -4    0.62    0.22 
  -6  -7   4    0.53    0.18 
   7  -7   4    3.32    0.37 
  -7   7   4    3.07    0.39 
  -7   7   4    3.48    0.32 
   7  -7   4    3.65    0.35 
   7   7  -4    3.97    0.35 
  -7   7   4    3.00    0.36 
  -7   7  -4    3.45    0.31 
   7  -7  -4    2.70    0.41 
  -7   7  -4    3.06    0.45 
  -7  -7   4    2.93    0.33 
  -7   7  -4    2.74    0.35 
  -8   7   4   29.83    1.50 
  -8   7   4   31.94    1.30 
   8  -7   4   33.32    1.43 
   8  -7   4   31.33    1.36 
  -8   7   4   31.65    1.35 
   8   7  -4   32.10    1.36 
  -8   7  -4   32.26    1.22 
  -8  -7   4   31.06    1.43 
  -8   7  -4   31.24    1.58 
   8  -7  -4   30.28    1.54 
  -8   7  -4   31.51    1.40 
   9   7  -4   22.10    1.04 
   9  -7   4   22.17    1.11 
  -9   7   4   23.09    1.00 
  -9   7   4   19.96    1.17 
  -9   7   4   22.16    0.95 
   9  -7   4   22.05    1.03 
  -9   7  -4   21.94    1.10 
   9   7   4   20.21    0.94 
  -9  -7   4   21.42    1.11 
  -9   7  -4   22.04    1.28 
   9  -7  -4   17.44    1.35 
 -10   7   4   13.78    0.63 
  10  -7   4   14.13    0.78 
 -10  -7  -4   13.99    0.79 
  10   7  -4   13.98    0.77 
 -10   7   4   12.82    0.91 
  10  -7   4   13.36    0.85 
 -10   7   4   13.87    0.66 
 -10  -7   4   14.07    0.86 
  10   7   4   14.43    0.76 
 -10   7  -4   14.41    0.85 
 -10   7  -4   12.83    0.95 
 -11  -7  -4   12.37    0.74 
  11  -7   4   12.93    0.74 
  11  -7   4   12.07    0.81 
  11   7  -4   13.37    0.76 
 -11   7   4   11.57    0.89 
 -11   7  -4   10.43    0.94 
 -11  -7   4   11.81    0.82 
  11   7   4   12.16    0.73 
 -11   7  -4   12.80    0.84 
  12  -7   4    8.07    0.58 
 -12  -7  -4    7.62    0.57 
 -12   7   4    7.51    0.74 
  12   7  -4    7.54    0.60 
  12  -7   4    7.31    0.71 
  12   7   4    8.51    0.42 
  12   7   4    7.09    0.62 
 -12   7  -4    7.05    0.69 
 -12  -7   4    7.01    0.62 
  13  -7   4    4.25    0.51 
  13   7  -4    4.83    0.58 
 -13  -7  -4    4.69    0.47 
  13  -7   4    4.57    0.69 
 -13   7   4    5.63    0.65 
  13   7   4    5.18    0.64 
  13  -7  -4    6.70    0.88 
 -13   7  -4    4.99    0.84 
 -13   7  -4    4.13    0.62 
 -13  -7   4    5.29    0.53 
  14  -7   4    1.21    0.54 
 -14   7   4    2.48    0.52 
  14   7  -4    1.79    0.73 
  14  -7   4    2.39    0.49 
 -14  -7  -4    1.45    0.32 
  14   7  -4    0.74    0.43 
 -14   7  -4    1.57    0.50 
  14  -7  -4    1.18    0.70 
 -14  -7   4    1.80    0.38 
 -15   7   4   14.70    1.11 
 -15  -7  -4   14.10    0.92 
  15   7  -4   15.44    1.34 
  15  -7   4   14.52    1.12 
  15   7  -4   14.99    0.96 
  15  -7   4   15.28    0.93 
  15  -7  -4   17.36    1.39 
  15   7   4   17.20    1.06 
 -15   7  -4   13.14    1.02 
 -15  -7   4   14.90    1.09 
  16  -7   4    0.53    0.94 
  16   7  -4    1.68    0.60 
  16   7  -4    2.80    0.98 
 -16   7   4    1.37    0.55 
 -16  -7  -4    1.35    0.36 
 -16   7  -4    1.76    0.58 
   0  -8  -4  251.59    7.49 
   0   8   4  230.58    7.67 
   0   8   4  241.04    7.59 
   0   8  -4  232.28    7.75 
   0  -8   4  237.36    7.70 
   0   8  -4  246.26    7.60 
   1  -8   4   11.09    0.65 
  -1   8   4   10.96    0.62 
  -1  -8  -4   12.07    0.47 
  -1   8   4   10.68    0.59 
   1   8  -4   10.37    0.55 
   1   8  -4   10.44    0.63 
   1   8   4   10.71    0.60 
   1  -8  -4   11.05    0.54 
  -1   8  -4   10.62    0.60 
   1   8   4   10.48    0.52 
  -1   8  -4   10.06    0.66 
  -1  -8   4   10.79    0.63 
  -2   8   4   86.07    3.10 
  -2   8   4   86.09    3.12 
   2  -8   4   87.68    3.13 
   2   8  -4   87.36    3.15 
   2  -8   4   91.76    3.02 
   2  -8  -4   87.83    3.03 
  -2   8  -4   92.06    3.11 
  -2  -8   4   87.51    3.07 
  -2   8  -4   89.24    3.17 
  -3   8   4   88.20    3.23
[truncated: 1,014,422 more chars]
