# Supplementary material for: Manganese-catalysed benzylic C(sp3)–H amination for late-stage functionalization
Source: Springer Nature journal article supplement (doi:10.1038/s41557-018-0020-0), 2018-04-30
Supplement: 41557_2018_20_MOESM156_ESM.mol [file 41557_2018_20_MOESM156_ESM.mol]

nchem.17061288C-comp37.mol
  ChemDraw01291813372D

 28 30  0  0  1  0  0  0  0  0999 V2000
   -2.4965    1.6461    0.0000 C   0  0  0  0  0  0  0  0  0  0  0  0
   -2.4965    0.8208    0.0000 C   0  0  0  0  0  0  0  0  0  0  0  0
   -1.7818    0.4081    0.0000 C   0  0  0  0  0  0  0  0  0  0  0  0
   -1.0676    0.8208    0.0000 C   0  0  0  0  0  0  0  0  0  0  0  0
   -1.0676    1.6461    0.0000 C   0  0  0  0  0  0  0  0  0  0  0  0
   -1.7818    2.0582    0.0000 C   0  0  0  0  0  0  0  0  0  0  0  0
   -0.3529    0.4081    0.0000 C   0  0  0  0  0  0  0  0  0  0  0  0
    0.3618    1.6461    0.0000 C   0  0  0  0  0  0  0  0  0  0  0  0
   -0.3529    2.0582    0.0000 C   0  0  0  0  0  0  0  0  0  0  0  0
    1.0765    2.0582    0.0000 N   0  0  0  0  0  0  0  0  0  0  0  0
    1.0765    2.8835    0.0000 C   0  0  0  0  0  0  0  0  0  0  0  0
    0.3618    3.2962    0.0000 C   0  0  0  0  0  0  0  0  0  0  0  0
   -0.3529    2.8835    0.0000 C   0  0  0  0  0  0  0  0  0  0  0  0
    1.7912    1.6461    0.0000 C   0  0  0  0  0  0  0  0  0  0  0  0
   -1.0676    2.4708    0.0000 H   0  0  0  0  0  0  0  0  0  0  0  0
    1.0765    1.2334    0.0000 H   0  0  0  0  0  0  0  0  0  0  0  0
    0.3618    0.8208    0.0000 C   0  0  0  0  0  0  0  0  0  0  0  0
    1.7912    0.8208    0.0000 C   0  0  0  0  0  0  0  0  0  0  0  0
   -0.3529   -0.4172    0.0000 N   0  0  0  0  0  0  0  0  0  0  0  0
    0.3594   -0.8285    0.0000 S   0  0  0  0  0  0  0  0  0  0  0  0
    0.7707   -0.1162    0.0000 O   0  0  0  0  0  0  0  0  0  0  0  0
    1.0718   -1.2398    0.0000 O   0  0  0  0  0  0  0  0  0  0  0  0
   -0.0518   -1.5409    0.0000 O   0  0  0  0  0  0  0  0  0  0  0  0
    1.0718   -2.0623    0.0000 C   0  0  0  0  0  0  0  0  0  0  0  0
    1.7841   -2.4736    0.0000 C   0  0  0  0  0  0  0  0  0  0  0  0
    2.4965   -2.8849    0.0000 Cl  0  0  0  0  0  0  0  0  0  0  0  0
    2.4965   -2.0623    0.0000 Cl  0  0  0  0  0  0  0  0  0  0  0  0
    1.7841   -3.2962    0.0000 Cl  0  0  0  0  0  0  0  0  0  0  0  0
 14 18  1  0      
 25 26  1  0      
 25 27  1  0      
 25 28  1  0      
 24 25  1  0      
 22 24  1  0      
 20 21  2  0      
 20 22  1  0      
 20 23  2  0      
 19 20  1  0      
  7 19  1  1      
  1  2  2  0      
  2  3  1  0      
  3  4  2  0      
  4  5  1  0      
  5  6  2  0      
  6  1  1  0      
  8  9  1  0      
  9  5  1  0      
  8 10  1  0      
 10 11  1  0      
 11 12  1  0      
 12 13  1  0      
 13  9  1  0      
 10 14  1  0      
  9 15  1  6      
  8 16  1  1      
  8 17  1  0      
 17  7  1  0      
  4  7  1  0      
M  STY  1   1 SUP
M  SLB  1   1   1
M  SAL   1  1  18
M  SBL   1  1   1
M  SMT   1 M^e
M  SBV   1   1    0.0000    0.8253
M  STY  1   2 SUP
M  SLB  1   2   2
M  SAL   2 10  19  20  21  22  23  24  25  26  27  28
M  SBL   2  1  11
M  SMT   2 NHTces
M  SBV   2  11    0.0000    0.8253
M  END
